# Supplementary material for: The impact of physical activity on social anxiety among college students: an analysis of the chain mediation effect of family support and self-efficacy
Source: PeerJ journal article supplement (doi:10.7717/peerj.20511), 2026-01-05
Supplement: QuestionnaireChinese.pdf [file QuestionnaireChinese.pdf]

## 运动参与对大学生社交焦虑情况的影响

同学您好，感谢您在百忙之中参与此次调查。本次调查主要为了研究运动参与对大学生社交焦虑情况的影响。本问卷实行匿名制，所有数据只用于统计分析，题目选项无对错之分，请按自己的实际情况填写。占用您的宝贵时间，再次向您表示感谢。

性别 [单选题] \*

☐男

☐女

年龄 [单选题] \*

☐17 岁及以下

☐18-20

☐21-23

☐24-26

☐27-29

☐30-32

☐33 及以上

现阶段就读情况 [单选题] \*

☐专科在读

☐本科在读

☐硕士在读

☐博士在读

## 一、运动参与量表

采用梁德清等人编制的《体育活动等级量表(PARS-3)》。本量表从参加体育锻炼的强度，时间，频率 3 个方面来考虑运动量。

1、您进行体育运动的强度怎样? ( ) [单选题] \*

- A.轻微运动（如散步、做广播体操、打门球等）
- B.小强度的不太紧张的运动（如消遣娱乐性的打排球、乒乓球、慢跑、打太极拳等）
- C.中等强度较激烈持久的运动（如骑自行车跑步打乒乓球等）
- D.呼吸急促、出汗很多的大强度的，但不持久的运动（如打羽毛球、篮球、网球、足球等）
- E.呼吸急促，出汗很多的大强度的持久的运动（如赛跑、成套健美操练习、游泳等）

2、您在进行上述强度体育活动时，一次多少分钟? ( ) [单选题] \*

- A.10 分钟以下
- B.11 至 20 分钟
- C.21 至 30 分钟
- D.31 至 59 分钟
- E.60 分钟以上

3、您一个月进行几次上述体育活动? ( ) [单选题] \*

- A.一个月 1 次以下
- B.每周 3 至 5 次
- C.一个月 2 至 3 次
- D.大约每天 1 次
- E.每周 1 到 2 次

4、您喜欢什么项目的体育运动? ( )

[多选题] \*

- ☐A.散步、跑步
- ☐B.旅游、郊游
- ☐C.体育舞蹈
- ☐D.球类
- ☐E.跳绳
- ☐F.太极拳、养生术
- ☐G.健身器活动
- ☐H.游泳
- ☐I.其他

## 二、社交焦虑量表

采用 Leary 编制的交往焦虑量表(Interaction Anxiousness Scale, IAS),中文版由彭纯子等修订。请认真阅读下面的每个条目,并决定其陈述对你适用或其真实的程度。根据以下标准在相应的条目下面的空格中进行选择。

1.即使在非正式的聚会上,我也常感到紧张。[单选题] \*

- ☐a.一点也不相符
- ☐b.与我有一点相符
- ☐c.与我中等强度相符
- ☐d.与我非常相符
- ☐e.与我极其相符

2.与一群不认识的人在一起时，我通常感到不自在。 [单选题] \*

- ☐ a.一点也不相符
- ☐ b.与我有一点相符
- ☐ c.与我中等强度相符
- ☐ d.与我非常相符
- ☐ e.与我极其相符

3.在与一位异性交谈时我通常感到轻松。（R） [单选题] \*

- ☐ a.一点也不相符
- ☐ b.与我有一点相符
- ☐ c.与我中等强度相符
- ☐ d.与我非常相符
- ☐ e.与我极其相符

4.在必须同老师或上司谈话时，我感到紧张。 [单选题] \*

- ☐ a.一点也不相符
- ☐ b.与我有一点相符
- ☐ c.与我中等强度相符
- ☐ d.与我非常相符
- ☐ e.与我极其相符

5.聚会常会使我感到焦虑及不自在。 [单选题] \*

- ☐ a.一点也不相符
- ☐ b.与我有一点相符
- ☐ c.与我中等强度相符

☐d.与我非常相符

☐e.与我极其相符

6.与大多数人相比，我在社会交往中可能较少羞怯(R) [单选题] \*

☐a.一点也不相符

☐b.与我有一点相符

☐c.与我中等强度相符

☐d.与我非常相符

☐e.与我极其相符

7.在与我不太熟悉的同性谈话时，我常常感到紧张。 [单选题] \*

☐a.一点也不相符

☐b.与我有一点相符

☐c.与我中等强度相符

☐d.与我非常相符

☐e.与我极其相符

8.在求职面试时我会紧张的。 [单选题] \*

☐a.一点也不相符

☐b.与我有一点相符

☐c.与我中等强度相符

☐d.与我非常相符

☐e.与我极其相符

9 我希望自己在社交场合中信心更足一些。 [单选题] \*

- ☐a.一点也不相符
- ☐b.与我有一点相符
- ☐c.与我中等强度相符
- ☐d.与我非常相符
- ☐e.与我极其相符

10.在社交场合中，我很少感到焦虑。(R) [单选题] \*

- ☐a.一点也不相符
- ☐b.与我有一点相符
- ☐c.与我中等强度相符
- ☐d.与我非常相符
- ☐e.与我极其相符

11 一般而言，我是一个害羞的人。 [单选题] \*

- ☐a.一点也不相符
- ☐b.与我有一点相符
- ☐c.与我中等强度相符
- ☐d.与我非常相符
- ☐e.与我极其相符

12.在与一位迷人的异性交谈时我经常感到紧张。 [单选题] \*

- ☐a.一点也不相符
- ☐b.与我有一点相符
- ☐c.与我中等强度相符
- ☐d.与我非常相符

☐e.与我极其相符

13.给不太熟的人打电话时我通常觉得紧张。 [单选题] \*

☐a.一点也不相符

☐b.与我有一点相符

☐c.与我中等强度相符

☐d.与我非常相符

☐e.与我极其相符

14.我在与权威人士谈话时感到紧张。 [单选题] \*

☐a.一点也不相符

☐b.与我有一点相符

☐c.与我中等强度相符

☐d.与我非常相符

☐e.与我极其相符

15.即使处于一群和我相当不同的人群之中，通常我仍感到放松。(R) [单选题] \*

☐a.一点也不相符

☐b.与我有一点相符

☐c.与我中等强度相符

☐d.与我非常相符

☐e.与我极其相符

### 三、家庭支持量表

家庭支持自评量表（Family Support Scale,PSS-Fa）美国 Procidano 和 Heller 根据我国国情对家庭支持自评量表进行了修订。根据实际情况选择是或否。

1. 当我需要的时候，我的家庭会给我义不容辞的支持。 [单选题] \*

☐是

☐否

2. 我能得到家庭成员给我的好主意。 [单选题] \*

☐是

☐否

3. 我与家庭成员之间的亲密关系不如与其他人的关系好。 [单选题] \*

☐是

☐否

4. 我向家中最亲密的成员倾诉痛苦后，他(她)也感到同样痛苦。 [单选题] \*

☐是

☐否

5. 家庭成员乐于倾听我的想法。 [单选题] \*

☐是

☐否

6. 我的许多快乐都与家庭成员共同分享。 [单选题] \*

☐是



☐否

7. 我依赖家庭成员给我情绪(精神)支持。 [单选题] \*

☐是

☐否

8. 如果我感到沮丧，我能向某个家庭成员诉说，且以后不会被嘲笑。 [单选题] \*

☐是

☐否

9. 我与家庭成员之间所考虑的共同的事情能彼此公开交流。 [单选题] \*

☐是

☐否

10. 对我个人的需要，我的家庭成员反应敏感。 [单选题] \*

☐是

☐否

11. 家庭成员乐于帮我解决问题。 [单选题] \*

☐是

☐否

12. 我和许多家庭成员之间关系很好。 [单选题] \*

☐是

☐否

13. 当我向家庭成员倾诉时，使我感到不舒服。 [单选题] \*

☐是

☐否

14. 如果其他人和家庭成员之间的关系过于密切，我感到不舒服。 [单选题] \*

☐是

☐否

15. 我希望我的家庭与现在有所不同。 [单选题] \*

☐是

☐否

#### 四、自我效能理论量表

一般自我效能感量表(GSES)由 Schwarzer 等人编制，中文版由王才康等人（2001）翻译修订。请根据自我情况进行选择。

1.如果我尽力去做的话，我总是能够解决问题的 [单选题] \*

☐极不符合

☐不符合

☐不确定

☐符合

☐极符合

2.即使别人反对我，我仍有办法取得我所要的 [单选题] \*

- ☐ 极不符合
- ☐ 不符合
- ☐ 不确定
- ☐ 符合
- ☐ 极符合

3.对我来说，坚持理想和达成目标是轻而易举的 [单选题] \*

- ☐ 极不符合
- ☐ 不符合
- ☐ 不确定
- ☐ 符合
- ☐ 极符合

4.我自信能有效地应付任何突如其来的事情 [单选题] \*

- ☐ 极不符合
- ☐ 不符合
- ☐ 不确定
- ☐ 符合
- ☐ 极符合

5.以我的才智，我定能应付意料之外的情况 [单选题] \*

- ☐ 极不符合
- ☐ 不符合
- ☐ 不确定

- ☐符合
- ☐极符合

6.如果我付出必要的努力，我一定能解决大多数的难题 [单选题] \*

- ☐极不符合
- ☐不符合
- ☐不确定
- ☐符合
- ☐极符合

7.我能冷静地面对困难，因为我可信赖自己处理问题的能力 [单选题] \*

- ☐极不符合
- ☐不符合
- ☐不确定
- ☐符合
- ☐极符合

8.面对一个难题时，我通常能找到几个解决方法 [单选题] \*

- ☐极不符合
- ☐不符合
- ☐不确定
- ☐符合
- ☐极符合

9.有麻烦的时候，我通常能想到一些应付的方法 [单选题] \*

- ☐ 极不符合
- ☐ 不符合
- ☐ 不确定
- ☐ 符合
- ☐ 极符合

10.无论在我身上发生什么事，我都能应付自如 [单选题] \*

- ☐ 极不符合
- ☐ 不符合
- ☐ 不确定
- ☐ 符合
- ☐ 极符合
