# Supplementary material for: The impact of physical activity on social anxiety among college students: an analysis of the chain mediation effect of family support and self-efficacy
Source: PeerJ journal article supplement (doi:10.7717/peerj.20511), 2026-01-05
Supplement: raw_data.zip [file 273380731_按文本_运动参与对大学生社交焦虑情况的影响_399_399.xlsx]

## Sheet: Sheet1
序号	提交答卷时间	所用时间	来源	来源详情	总分	性别	年龄	现阶段就读情况	1、您进行体育运动的强度怎样? （ ）	2、您在进行上述强度体育活动时，一次多少分钟?（ ）	3、您一个月进行几次上述体育活动? （ ）	4、您喜欢什么项目的体育运动? （ ）	1.即使在非正式的聚会上，我也常感到紧张。	2.与一群不认识的人在一起时，我通常感到不自在。	3.在与一位异性交谈时我通常感到轻松。（R）	4.在必须同老师或上司谈话时，我感到紧张。	5.聚会常会使我感到焦虑及不自在。	6.与大多数人相比，我在社会交往中可能较少羞怯(R)	7.在与我不太熟悉的同性谈话时，我常常感到紧张。	8.在求职面试时我会紧张的。	9我希望自己在社交场合中信心更足一些。	10.在社交场合中，我很少感到焦虑。(R)	11一般而言，我是一个害羞的人。	12.在与一位迷人的异性交谈时我经常感到紧张。	13.给不太熟的人打电话时我通常觉得紧张。	14.我在与权威人士谈话时感到紧张。	15.即使处于一群和我相当不同的人群之中，通常我仍感到放松。(R)	1. 当我需要的时候，我的家庭会给我义不容辞的支持。	2. 我能得到家庭成员给我的好主意。	3. .我与家庭成员之间的亲密关系不如与其他人的关系好。	4. 我向家中最亲密的成员倾诉痛苦后，他(她)也感到同样痛苦。	5. 家庭成员乐于倾听我的想法。	6. 我的许多快乐都与家庭成员共同分享。	7. 我依赖家庭成员给我情绪(精神)支持。	8. 如果我感到沮丧，我能向某个家庭成员诉说，且以后不会被嘲笑。	9. 我与家庭成员之间所考虑的共同的事情能彼此公开交流。	10. 对我个人的需要，我的家庭成员反应敏感。	11. 家庭成员乐于帮我解决问题。	12. 我和许多家庭成员之间关系很好。	13. 当我向家庭成员倾诉时，使我感到不舒服。	14. 如果其他人和家庭成员之间的关系过于密切，我感到不舒服。	15. 我希望我的家庭与现在有所不同。	1.如果我尽力去做的话，我总是能够解决问题的	2.即使别人反对我，我仍有办法取得我所要的	3.对我来说，坚持理想和达成目标是轻而易举的	4.我自信能有效地应付任何突如其来的事情	5.以我的才智，我定能应付意料之外的情况	6.如果我付出必要的努力，我一定能解决大多数的难题	7.我能冷静地面对困难，因为我可信赖自己处理问题的能力
1	2024/6/28 18:54:19	254秒	微信	N/A	112	男	21-23	本科在读	B.小强度的不太紧张的运动（如消遣娱乐性的打排球、乒乓球、慢跑、打太极拳等）	E.60分钟以上	B.每周3至5次	A.散步、跑步┋B.旅游、郊游┋D.球类┋H.游泳	d.与我非常相符	e.与我极其相符	c.与我中等强度相符	d.与我非常相符	d.与我非常相符	c.与我中等强度相符	c.与我中等强度相符	d.与我非常相符	d.与我非常相符	c.与我中等强度相符	c.与我中等强度相符	d.与我非常相符	d.与我非常相符	d.与我非常相符	c.与我中等强度相符	是	是	否	是	是	是	是	是	是	否	是	是	否	否	是	符合	符合	符合	符合	不确定	符合	不确定
2	2024/6/28 19:03:04	1201秒	微信	N/A	103	女	24-26	硕士在读	D.呼吸急促、出汗很多的大强度的，但不持久的运动（如打羽毛球、篮球、网球、足球等）	E.60分钟以上	E.每周1到2次	G.健身器活动	a.一点也不相符	c.与我中等强度相符	b.与我有一点相符	c.与我中等强度相符	c.与我中等强度相符	b.与我有一点相符	a.一点也不相符	e.与我极其相符	e.与我极其相符	e.与我极其相符	b.与我有一点相符	a.一点也不相符	a.一点也不相符	b.与我有一点相符	a.一点也不相符	是	是	否	是	是	是	是	是	是	是	是	是	否	否	否	符合	符合	不确定	不确定	符合	符合	符合
3	2024/6/28 19:05:15	448秒	微信	N/A	86	男	33及以上	硕士在读	A.轻微运动（如散步、做广播体操、打门球等）	C.21至30分钟	C.一个月2至3次	A.散步、跑步┋B.旅游、郊游┋F.太极拳、养生术	a.一点也不相符	a.一点也不相符	b.与我有一点相符	b.与我有一点相符	a.一点也不相符	b.与我有一点相符	b.与我有一点相符	b.与我有一点相符	b.与我有一点相符	b.与我有一点相符	b.与我有一点相符	b.与我有一点相符	b.与我有一点相符	b.与我有一点相符	b.与我有一点相符	是	是	否	否	是	是	是	是	是	否	是	是	否	否	否	符合	符合	不符合	符合	不确定	不确定	符合
4	2024/6/28 19:12:50	307秒	微信	N/A	95	女	24-26	本科在读	A.轻微运动（如散步、做广播体操、打门球等）	A.10分钟以下	A.一个月1次以下	A.散步、跑步┋B.旅游、郊游	d.与我非常相符	e.与我极其相符	a.一点也不相符	d.与我非常相符	d.与我非常相符	e.与我极其相符	b.与我有一点相符	e.与我极其相符	e.与我极其相符	b.与我有一点相符	d.与我非常相符	e.与我极其相符	a.一点也不相符	d.与我非常相符	a.一点也不相符	否	否	是	是	否	否	否	否	否	否	否	否	是	否	是	不确定	不确定	不确定	极不符合	不确定	符合	不确定
5	2024/6/28 19:44:54	717秒	微信	N/A	92	女	24-26	硕士在读	B.小强度的不太紧张的运动（如消遣娱乐性的打排球、乒乓球、慢跑、打太极拳等）	E.60分钟以上	E.每周1到2次	D.球类	a.一点也不相符	b.与我有一点相符	b.与我有一点相符	c.与我中等强度相符	a.一点也不相符	b.与我有一点相符	a.一点也不相符	c.与我中等强度相符	d.与我非常相符	b.与我有一点相符	c.与我中等强度相符	d.与我非常相符	d.与我非常相符	d.与我非常相符	d.与我非常相符	是	是	否	否	是	是	是	是	是	否	是	是	否	否	是	不确定	符合	不确定	不符合	不符合	符合	不符合
6	2024/6/28 20:18:45	303秒	微信	N/A	89	女	24-26	硕士在读	C.中等强度较激烈持久的运动（如骑自行车跑步打乒乓球等）	D.31至59分钟	E.每周1到2次	A.散步、跑步┋B.旅游、郊游┋D.球类┋E.跳绳	a.一点也不相符	b.与我有一点相符	a.一点也不相符	b.与我有一点相符	a.一点也不相符	d.与我非常相符	a.一点也不相符	c.与我中等强度相符	b.与我有一点相符	a.一点也不相符	b.与我有一点相符	c.与我中等强度相符	a.一点也不相符	c.与我中等强度相符	b.与我有一点相符	是	是	否	否	是	是	是	是	是	否	是	是	否	否	否	符合	不确定	不符合	不确定	不确定	不确定	不确定
7	2024/6/28 21:05:28	140秒	微信	N/A	104	女	18-20	本科在读	B.小强度的不太紧张的运动（如消遣娱乐性的打排球、乒乓球、慢跑、打太极拳等）	B.11至20分钟	E.每周1到2次	A.散步、跑步	d.与我非常相符	e.与我极其相符	a.一点也不相符	d.与我非常相符	d.与我非常相符	c.与我中等强度相符	c.与我中等强度相符	c.与我中等强度相符	c.与我中等强度相符	a.一点也不相符	b.与我有一点相符	b.与我有一点相符	d.与我非常相符	d.与我非常相符	a.一点也不相符	否	否	否	是	否	否	否	否	否	是	是	否	是	否	否	符合	符合	不确定	不确定	不确定	符合	符合
8	2024/6/28 21:06:08	176秒	微信	N/A	84	男	18-20	本科在读	A.轻微运动（如散步、做广播体操、打门球等）	C.21至30分钟	A.一个月1次以下	A.散步、跑步	a.一点也不相符	b.与我有一点相符	b.与我有一点相符	b.与我有一点相符	a.一点也不相符	b.与我有一点相符	b.与我有一点相符	b.与我有一点相符	b.与我有一点相符	b.与我有一点相符	b.与我有一点相符	b.与我有一点相符	b.与我有一点相符	b.与我有一点相符	b.与我有一点相符	是	否	否	否	是	否	是	否	是	否	是	是	否	否	否	符合	符合	不确定	不确定	符合	符合	符合
9	2024/6/28 21:06:22	202秒	微信	N/A	104	女	18-20	本科在读	A.轻微运动（如散步、做广播体操、打门球等）	B.11至20分钟	C.一个月2至3次	D.球类	d.与我非常相符	d.与我非常相符	c.与我中等强度相符	d.与我非常相符	d.与我非常相符	a.一点也不相符	c.与我中等强度相符	c.与我中等强度相符	c.与我中等强度相符	a.一点也不相符	d.与我非常相符	c.与我中等强度相符	d.与我非常相符	d.与我非常相符	c.与我中等强度相符	是	是	否	否	是	否	否	是	是	否	是	是	否	是	否	符合	符合	不确定	不确定	不确定	符合	不确定
10	2024/6/28 21:07:37	313秒	手机提交	直接访问	97	女	21-23	本科在读	B.小强度的不太紧张的运动（如消遣娱乐性的打排球、乒乓球、慢跑、打太极拳等）	E.60分钟以上	E.每周1到2次	A.散步、跑步┋D.球类	b.与我有一点相符	c.与我中等强度相符	a.一点也不相符	d.与我非常相符	b.与我有一点相符	a.一点也不相符	b.与我有一点相符	d.与我非常相符	d.与我非常相符	c.与我中等强度相符	b.与我有一点相符	b.与我有一点相符	b.与我有一点相符	d.与我非常相符	a.一点也不相符	是	否	是	是	是	否	否	否	是	否	是	否	是	否	是	不确定	不确定	不符合	不符合	不符合	不确定	不符合
11	2024/6/28 21:09:23	201秒	微信	N/A	92	男	18-20	本科在读	B.小强度的不太紧张的运动（如消遣娱乐性的打排球、乒乓球、慢跑、打太极拳等）	E.60分钟以上	E.每周1到2次	D.球类	b.与我有一点相符	a.一点也不相符	b.与我有一点相符	b.与我有一点相符	a.一点也不相符	b.与我有一点相符	a.一点也不相符	b.与我有一点相符	c.与我中等强度相符	c.与我中等强度相符	a.一点也不相符	b.与我有一点相符	b.与我有一点相符	b.与我有一点相符	b.与我有一点相符	是	是	否	是	是	是	是	是	是	否	是	是	否	否	否	符合	符合	不确定	不确定	不确定	符合	符合
12	2024/6/28 21:09:55	186秒	微信	N/A	101	女	18-20	本科在读	B.小强度的不太紧张的运动（如消遣娱乐性的打排球、乒乓球、慢跑、打太极拳等）	C.21至30分钟	E.每周1到2次	A.散步、跑步┋B.旅游、郊游┋D.球类	b.与我有一点相符	d.与我非常相符	b.与我有一点相符	c.与我中等强度相符	b.与我有一点相符	a.一点也不相符	b.与我有一点相符	c.与我中等强度相符	c.与我中等强度相符	a.一点也不相符	b.与我有一点相符	c.与我中等强度相符	b.与我有一点相符	c.与我中等强度相符	b.与我有一点相符	是	是	否	否	是	是	是	是	是	是	是	是	否	否	否	符合	符合	不确定	不确定	不确定	符合	不确定
13	2024/6/28 21:15:00	207秒	微信	N/A	105	男	18-20	本科在读	D.呼吸急促、出汗很多的大强度的，但不持久的运动（如打羽毛球、篮球、网球、足球等）	E.60分钟以上	B.每周3至5次	A.散步、跑步┋D.球类┋H.游泳	b.与我有一点相符	b.与我有一点相符	b.与我有一点相符	d.与我非常相符	b.与我有一点相符	b.与我有一点相符	b.与我有一点相符	d.与我非常相符	d.与我非常相符	b.与我有一点相符	b.与我有一点相符	c.与我中等强度相符	c.与我中等强度相符	c.与我中等强度相符	b.与我有一点相符	是	是	否	是	是	是	是	是	是	是	是	是	否	否	否	符合	符合	不确定	符合	不确定	符合	符合
14	2024/6/28 21:15:43	258秒	微信	N/A	108	男	18-20	本科在读	C.中等强度较激烈持久的运动（如骑自行车跑步打乒乓球等）	D.31至59分钟	C.一个月2至3次	D.球类	b.与我有一点相符	b.与我有一点相符	b.与我有一点相符	b.与我有一点相符	c.与我中等强度相符	d.与我非常相符	c.与我中等强度相符	d.与我非常相符	e.与我极其相符	c.与我中等强度相符	d.与我非常相符	d.与我非常相符	c.与我中等强度相符	c.与我中等强度相符	b.与我有一点相符	是	是	是	是	是	是	是	是	是	是	是	是	是	是	是	符合	符合	不确定	符合	符合	符合	符合
15	2024/6/28 21:19:22	234秒	微信	N/A	95	男	18-20	本科在读	A.轻微运动（如散步、做广播体操、打门球等）	C.21至30分钟	B.每周3至5次	A.散步、跑步┋D.球类	b.与我有一点相符	b.与我有一点相符	b.与我有一点相符	c.与我中等强度相符	c.与我中等强度相符	c.与我中等强度相符	b.与我有一点相符	b.与我有一点相符	e.与我极其相符	d.与我非常相符	b.与我有一点相符	a.一点也不相符	b.与我有一点相符	c.与我中等强度相符	b.与我有一点相符	是	是	否	否	是	是	否	是	是	否	是	是	否	否	否	符合	符合	不确定	不确定	不确定	极符合	极符合
16	2024/6/28 21:23:03	293秒	微信	N/A	85	女	18-20	本科在读	B.小强度的不太紧张的运动（如消遣娱乐性的打排球、乒乓球、慢跑、打太极拳等）	D.31至59分钟	E.每周1到2次	A.散步、跑步┋B.旅游、郊游┋D.球类┋F.太极拳、养生术┋G.健身器活动┋H.游泳	a.一点也不相符	b.与我有一点相符	c.与我中等强度相符	b.与我有一点相符	b.与我有一点相符	d.与我非常相符	b.与我有一点相符	c.与我中等强度相符	b.与我有一点相符	d.与我非常相符	b.与我有一点相符	c.与我中等强度相符	b.与我有一点相符	c.与我中等强度相符	d.与我非常相符	是	是	否	否	是	是	是	是	是	否	是	是	否	否	否	符合	不确定	不确定	不确定	不确定	符合	不确定
17	2024/6/28 21:28:29	84秒	微信	N/A	81	男	18-20	本科在读	A.轻微运动（如散步、做广播体操、打门球等）	A.10分钟以下	B.每周3至5次	A.散步、跑步┋B.旅游、郊游	a.一点也不相符	b.与我有一点相符	d.与我非常相符	a.一点也不相符	c.与我中等强度相符	c.与我中等强度相符	c.与我中等强度相符	c.与我中等强度相符	c.与我中等强度相符	c.与我中等强度相符	a.一点也不相符	e.与我极其相符	d.与我非常相符	c.与我中等强度相符	c.与我中等强度相符	否	否	是	否	是	否	否	否	是	是	是	否	是	否	是	不确定	不确定	不确定	不确定	不确定	不确定	不确定
18	2024/6/28 21:38:24	213秒	手机提交	直接访问	104	女	18-20	本科在读	D.呼吸急促、出汗很多的大强度的，但不持久的运动（如打羽毛球、篮球、网球、足球等）	C.21至30分钟	C.一个月2至3次	A.散步、跑步┋D.球类	b.与我有一点相符	b.与我有一点相符	a.一点也不相符	b.与我有一点相符	c.与我中等强度相符	a.一点也不相符	b.与我有一点相符	b.与我有一点相符	e.与我极其相符	b.与我有一点相符	b.与我有一点相符	b.与我有一点相符	c.与我中等强度相符	d.与我非常相符	b.与我有一点相符	是	是	否	是	是	是	是	是	是	是	是	是	否	否	否	符合	符合	不确定	符合	不确定	符合	符合
19	2024/6/28 21:42:40	201秒	微信	N/A	101	男	18-20	本科在读	C.中等强度较激烈持久的运动（如骑自行车跑步打乒乓球等）	D.31至59分钟	D.大约每天1次	A.散步、跑步┋B.旅游、郊游┋D.球类┋E.跳绳	b.与我有一点相符	c.与我中等强度相符	c.与我中等强度相符	c.与我中等强度相符	a.一点也不相符	a.一点也不相符	a.一点也不相符	b.与我有一点相符	c.与我中等强度相符	c.与我中等强度相符	b.与我有一点相符	b.与我有一点相符	b.与我有一点相符	b.与我有一点相符	b.与我有一点相符	是	是	否	是	是	是	是	是	是	是	是	是	是	是	是	极符合	符合	不确定	不确定	不确定	符合	符合
20	2024/6/28 21:55:49	113秒	微信	N/A	94	女	18-20	本科在读	B.小强度的不太紧张的运动（如消遣娱乐性的打排球、乒乓球、慢跑、打太极拳等）	C.21至30分钟	C.一个月2至3次	A.散步、跑步┋B.旅游、郊游┋F.太极拳、养生术┋G.健身器活动	b.与我有一点相符	b.与我有一点相符	b.与我有一点相符	b.与我有一点相符	b.与我有一点相符	b.与我有一点相符	b.与我有一点相符	b.与我有一点相符	b.与我有一点相符	b.与我有一点相符	b.与我有一点相符	b.与我有一点相符	b.与我有一点相符	b.与我有一点相符	b.与我有一点相符	是	是	是	是	是	是	是	是	是	是	是	是	是	是	是	符合	符合	符合	不确定	不确定	不确定	不确定
21	2024/6/28 21:57:35	166秒	微信	N/A	86	男	18-20	本科在读	B.小强度的不太紧张的运动（如消遣娱乐性的打排球、乒乓球、慢跑、打太极拳等）	B.11至20分钟	B.每周3至5次	A.散步、跑步	c.与我中等强度相符	c.与我中等强度相符	c.与我中等强度相符	c.与我中等强度相符	c.与我中等强度相符	c.与我中等强度相符	c.与我中等强度相符	c.与我中等强度相符	c.与我中等强度相符	c.与我中等强度相符	c.与我中等强度相符	c.与我中等强度相符	c.与我中等强度相符	c.与我中等强度相符	c.与我中等强度相符	否	否	是	否	否	否	否	否	否	是	否	否	是	否	是	符合	不确定	不确定	不确定	不确定	不确定	不确定
22	2024/6/28 22:20:24	265秒	微信	N/A	109	男	18-20	本科在读	C.中等强度较激烈持久的运动（如骑自行车跑步打乒乓球等）	C.21至30分钟	E.每周1到2次	A.散步、跑步┋B.旅游、郊游┋D.球类	c.与我中等强度相符	d.与我非常相符	b.与我有一点相符	d.与我非常相符	c.与我中等强度相符	c.与我中等强度相符	d.与我非常相符	d.与我非常相符	e.与我极其相符	b.与我有一点相符	b.与我有一点相符	e.与我极其相符	c.与我中等强度相符	e.与我极其相符	c.与我中等强度相符	是	是	是	是	是	否	否	否	否	否	是	是	否	否	是	符合	不确定	不确定	不符合	不确定	符合	符合
23	2024/6/28 22:41:24	226秒	微信	N/A	98	男	18-20	本科在读	C.中等强度较激烈持久的运动（如骑自行车跑步打乒乓球等）	D.31至59分钟	D.大约每天1次	D.球类┋E.跳绳	b.与我有一点相符	b.与我有一点相符	d.与我非常相符	b.与我有一点相符	b.与我有一点相符	b.与我有一点相符	b.与我有一点相符	d.与我非常相符	d.与我非常相符	c.与我中等强度相符	c.与我中等强度相符	c.与我中等强度相符	b.与我有一点相符	b.与我有一点相符	b.与我有一点相符	是	是	是	否	是	是	是	是	是	是	是	是	是	是	是	符合	不确定	不确定	不确定	不确定	符合	不确定
24	2024/6/28 22:46:05	221秒	微信	N/A	98	男	18-20	本科在读	C.中等强度较激烈持久的运动（如骑自行车跑步打乒乓球等）	C.21至30分钟	E.每周1到2次	A.散步、跑步┋B.旅游、郊游┋F.太极拳、养生术	c.与我中等强度相符	c.与我中等强度相符	a.一点也不相符	b.与我有一点相符	c.与我中等强度相符	a.一点也不相符	b.与我有一点相符	b.与我有一点相符	c.与我中等强度相符	b.与我有一点相符	c.与我中等强度相符	c.与我中等强度相符	a.一点也不相符	b.与我有一点相符	b.与我有一点相符	是	是	否	否	是	否	是	是	是	是	是	是	是	是	是	不确定	不确定	不符合	不确定	不确定	不确定	不确定
25	2024/6/28 23:36:39	235秒	微信	N/A	90	男	24-26	硕士在读	D.呼吸急促、出汗很多的大强度的，但不持久的运动（如打羽毛球、篮球、网球、足球等）	E.60分钟以上	E.每周1到2次	A.散步、跑步┋F.太极拳、养生术	a.一点也不相符	b.与我有一点相符	d.与我非常相符	b.与我有一点相符	b.与我有一点相符	b.与我有一点相符	b.与我有一点相符	b.与我有一点相符	b.与我有一点相符	b.与我有一点相符	b.与我有一点相符	b.与我有一点相符	b.与我有一点相符	b.与我有一点相符	b.与我有一点相符	是	是	否	是	否	否	是	是	是	否	是	是	否	否	否	不确定	不确定	不确定	不确定	不确定	不确定	符合
26	2024/6/28 23:39:15	224秒	微信	N/A	105	女	24-26	硕士在读	D.呼吸急促、出汗很多的大强度的，但不持久的运动（如打羽毛球、篮球、网球、足球等）	E.60分钟以上	C.一个月2至3次	C.体育舞蹈┋D.球类	b.与我有一点相符	b.与我有一点相符	a.一点也不相符	d.与我非常相符	b.与我有一点相符	b.与我有一点相符	a.一点也不相符	d.与我非常相符	d.与我非常相符	a.一点也不相符	c.与我中等强度相符	c.与我中等强度相符	b.与我有一点相符	d.与我非常相符	e.与我极其相符	是	是	是	否	是	是	是	是	是	否	是	是	否	是	是	符合	不确定	符合	不确定	不确定	符合	符合
27	2024/6/28 23:41:21	187秒	微信	N/A	120	女	21-23	硕士在读	B.小强度的不太紧张的运动（如消遣娱乐性的打排球、乒乓球、慢跑、打太极拳等）	E.60分钟以上	E.每周1到2次	D.球类	d.与我非常相符	d.与我非常相符	b.与我有一点相符	d.与我非常相符	d.与我非常相符	e.与我极其相符	d.与我非常相符	e.与我极其相符	e.与我极其相符	a.一点也不相符	e.与我极其相符	d.与我非常相符	d.与我非常相符	d.与我非常相符	a.一点也不相符	是	是	否	是	是	是	是	是	是	是	是	是	否	否	是	符合	符合	不确定	不确定	不确定	符合	符合
28	2024/6/28 23:42:08	65秒	微信	N/A	104	男	18-20	本科在读	C.中等强度较激烈持久的运动（如骑自行车跑步打乒乓球等）	D.31至59分钟	A.一个月1次以下	A.散步、跑步┋C.体育舞蹈┋D.球类┋E.跳绳┋G.健身器活动┋H.游泳	a.一点也不相符	a.一点也不相符	a.一点也不相符	a.一点也不相符	a.一点也不相符	a.一点也不相符	a.一点也不相符	a.一点也不相符	a.一点也不相符	a.一点也不相符	a.一点也不相符	a.一点也不相符	a.一点也不相符	a.一点也不相符	a.一点也不相符	是	是	是	是	是	是	是	是	是	是	是	是	是	是	是	极符合	极符合	极符合	极符合	极符合	极符合	极符合
29	2024/6/28 23:42:21	162秒	微信	N/A	101	男	21-23	本科在读	D.呼吸急促、出汗很多的大强度的，但不持久的运动（如打羽毛球、篮球、网球、足球等）	E.60分钟以上	E.每周1到2次	A.散步、跑步┋B.旅游、郊游┋D.球类	a.一点也不相符	b.与我有一点相符	d.与我非常相符	c.与我中等强度相符	c.与我中等强度相符	b.与我有一点相符	a.一点也不相符	e.与我极其相符	e.与我极其相符	b.与我有一点相符	d.与我非常相符	d.与我非常相符	e.与我极其相符	e.与我极其相符	c.与我中等强度相符	是	是	否	否	否	否	否	否	是	否	是	是	是	否	否	符合	不确定	不确定	不符合	不确定	不确定	不确定
30	2024/6/28 23:42:24	128秒	微信	N/A	96	男	24-26	硕士在读	B.小强度的不太紧张的运动（如消遣娱乐性的打排球、乒乓球、慢跑、打太极拳等）	C.21至30分钟	C.一个月2至3次	B.旅游、郊游┋D.球类┋H.游泳┋I.其他	b.与我有一点相符	b.与我有一点相符	b.与我有一点相符	c.与我中等强度相符	d.与我非常相符	c.与我中等强度相符	c.与我中等强度相符	b.与我有一点相符	b.与我有一点相符	d.与我非常相符	d.与我非常相符	d.与我非常相符	b.与我有一点相符	b.与我有一点相符	a.一点也不相符	是	是	是	是	是	是	是	是	是	是	是	是	是	是	是	不确定	不确定	不确定	不确定	极不符合	不确定	符合
31	2024/6/28 23:42:26	318秒	微信	N/A	106	女	18-20	本科在读	A.轻微运动（如散步、做广播体操、打门球等）	B.11至20分钟	E.每周1到2次	F.太极拳、养生术┋I.其他	b.与我有一点相符	d.与我非常相符	a.一点也不相符	d.与我非常相符	d.与我非常相符	b.与我有一点相符	c.与我中等强度相符	d.与我非常相符	d.与我非常相符	c.与我中等强度相符	c.与我中等强度相符	b.与我有一点相符	c.与我中等强度相符	c.与我中等强度相符	b.与我有一点相符	是	是	否	否	是	是	是	是	是	否	是	是	否	否	否	符合	符合	符合	不确定	不确定	符合	符合
32	2024/6/28 23:42:33	433秒	微信	N/A	79	男	21-23	硕士在读	D.呼吸急促、出汗很多的大强度的，但不持久的运动（如打羽毛球、篮球、网球、足球等）	E.60分钟以上	D.大约每天1次	D.球类	a.一点也不相符	a.一点也不相符	a.一点也不相符	a.一点也不相符	a.一点也不相符	a.一点也不相符	a.一点也不相符	b.与我有一点相符	e.与我极其相符	e.与我极其相符	a.一点也不相符	a.一点也不相符	a.一点也不相符	b.与我有一点相符	e.与我极其相符	否	否	是	否	否	否	否	否	否	是	否	否	是	否	是	符合	符合	不确定	不符合	不符合	符合	符合
33	2024/6/28 23:42:52	148秒	微信	N/A	116	女	24-26	硕士在读	A.轻微运动（如散步、做广播体操、打门球等）	C.21至30分钟	C.一个月2至3次	A.散步、跑步	d.与我非常相符	b.与我有一点相符	b.与我有一点相符	b.与我有一点相符	b.与我有一点相符	b.与我有一点相符	b.与我有一点相符	c.与我中等强度相符	e.与我极其相符	c.与我中等强度相符	e.与我极其相符	b.与我有一点相符	b.与我有一点相符	b.与我有一点相符	c.与我中等强度相符	是	是	否	是	是	是	是	是	是	是	是	是	是	是	是	极符合	极符合	极符合	极符合	极符合	极符合	极符合
34	2024/6/28 23:42:52	128秒	微信	N/A	108	女	24-26	硕士在读	D.呼吸急促、出汗很多的大强度的，但不持久的运动（如打羽毛球、篮球、网球、足球等）	D.31至59分钟	D.大约每天1次	C.体育舞蹈	b.与我有一点相符	a.一点也不相符	b.与我有一点相符	d.与我非常相符	d.与我非常相符	c.与我中等强度相符	b.与我有一点相符	d.与我非常相符	d.与我非常相符	c.与我中等强度相符	d.与我非常相符	c.与我中等强度相符	c.与我中等强度相符	c.与我中等强度相符	c.与我中等强度相符	是	是	否	否	是	是	是	是	是	是	是	是	是	是	是	不符合	不确定	不确定	符合	符合	符合	符合
35	2024/6/28 23:43:29	127秒	微信	N/A	101	女	18-20	本科在读	A.轻微运动（如散步、做广播体操、打门球等）	C.21至30分钟	C.一个月2至3次	B.旅游、郊游┋C.体育舞蹈┋G.健身器活动┋H.游泳	a.一点也不相符	a.一点也不相符	c.与我中等强度相符	b.与我有一点相符	a.一点也不相符	a.一点也不相符	a.一点也不相符	b.与我有一点相符	a.一点也不相符	c.与我中等强度相符	a.一点也不相符	b.与我有一点相符	a.一点也不相符	b.与我有一点相符	b.与我有一点相符	是	是	否	是	是	是	是	是	是	是	是	是	是	是	是	极符合	极符合	极符合	极符合	极符合	极符合	极符合
36	2024/6/28 23:43:37	159秒	微信	N/A	98	男	21-23	本科在读	D.呼吸急促、出汗很多的大强度的，但不持久的运动（如打羽毛球、篮球、网球、足球等）	E.60分钟以上	D.大约每天1次	D.球类┋G.健身器活动	a.一点也不相符	c.与我中等强度相符	c.与我中等强度相符	b.与我有一点相符	a.一点也不相符	b.与我有一点相符	c.与我中等强度相符	b.与我有一点相符	e.与我极其相符	c.与我中等强度相符	a.一点也不相符	d.与我非常相符	c.与我中等强度相符	d.与我非常相符	b.与我有一点相符	是	否	否	否	是	否	否	否	是	否	是	是	否	是	是	符合	不确定	不符合	符合	不确定	符合	符合
37	2024/6/28 23:44:34	167秒	微信	N/A	101	女	18-20	本科在读	A.轻微运动（如散步、做广播体操、打门球等）	B.11至20分钟	C.一个月2至3次	I.其他	c.与我中等强度相符	c.与我中等强度相符	a.一点也不相符	c.与我中等强度相符	c.与我中等强度相符	a.一点也不相符	b.与我有一点相符	d.与我非常相符	d.与我非常相符	c.与我中等强度相符	b.与我有一点相符	b.与我有一点相符	d.与我非常相符	c.与我中等强度相符	b.与我有一点相符	是	是	否	否	是	是	是	是	是	是	是	是	否	否	否	符合	符合	不确定	不确定	不确定	不确定	符合
38	2024/6/28 23:44:56	292秒	微信	N/A	106	女	21-23	硕士在读	D.呼吸急促、出汗很多的大强度的，但不持久的运动（如打羽毛球、篮球、网球、足球等）	D.31至59分钟	C.一个月2至3次	A.散步、跑步┋B.旅游、郊游┋D.球类	b.与我有一点相符	e.与我极其相符	a.一点也不相符	d.与我非常相符	d.与我非常相符	c.与我中等强度相符	a.一点也不相符	d.与我非常相符	d.与我非常相符	b.与我有一点相符	a.一点也不相符	c.与我中等强度相符	b.与我有一点相符	d.与我非常相符	a.一点也不相符	是	是	否	否	是	是	是	是	是	是	是	是	否	否	否	符合	符合	不确定	不符合	不确定	符合	不确定
39	2024/6/28 23:45:14	109秒	微信	N/A	84	男	30-32	硕士在读	E.呼吸急促，出汗很多的大强度的持久的运动（如赛跑、成套健美操练习、游泳等）	E.60分钟以上	B.每周3至5次	G.健身器活动	b.与我有一点相符	b.与我有一点相符	b.与我有一点相符	b.与我有一点相符	d.与我非常相符	b.与我有一点相符	b.与我有一点相符	b.与我有一点相符	b.与我有一点相符	c.与我中等强度相符	c.与我中等强度相符	b.与我有一点相符	c.与我中等强度相符	b.与我有一点相符	b.与我有一点相符	是	否	是	否	否	否	是	是	是	是	是	是	是	是	是	不确定	不确定	极不符合	不符合	极不符合	极不符合	不符合
40	2024/6/28 23:45:17	139秒	微信	N/A	103	男	24-26	硕士在读	B.小强度的不太紧张的运动（如消遣娱乐性的打排球、乒乓球、慢跑、打太极拳等）	E.60分钟以上	E.每周1到2次	A.散步、跑步┋B.旅游、郊游┋F.太极拳、养生术┋G.健身器活动┋I.其他	e.与我极其相符	c.与我中等强度相符	c.与我中等强度相符	e.与我极其相符	d.与我非常相符	b.与我有一点相符	b.与我有一点相符	a.一点也不相符	a.一点也不相符	a.一点也不相符	e.与我极其相符	d.与我非常相符	b.与我有一点相符	c.与我中等强度相符	b.与我有一点相符	是	是	是	否	是	否	否	是	是	否	是	是	否	否	否	极不符合	不确定	不确定	符合	符合	符合	不符合
41	2024/6/28 23:45:53	64秒	微信	N/A	82	男	24-26	硕士在读	A.轻微运动（如散步、做广播体操、打门球等）	A.10分钟以下	A.一个月1次以下	A.散步、跑步┋E.跳绳	a.一点也不相符	d.与我非常相符	a.一点也不相符	b.与我有一点相符	b.与我有一点相符	b.与我有一点相符	b.与我有一点相符	c.与我中等强度相符	b.与我有一点相符	c.与我中等强度相符	b.与我有一点相符	b.与我有一点相符	c.与我中等强度相符	c.与我中等强度相符	c.与我中等强度相符	是	是	是	是	是	是	是	是	是	是	是	是	是	是	是	极不符合	不符合	符合	符合	不确定	极不符合	不符合
42	2024/6/28 23:45:55	104秒	微信	N/A	110	女	21-23	硕士在读	B.小强度的不太紧张的运动（如消遣娱乐性的打排球、乒乓球、慢跑、打太极拳等）	D.31至59分钟	E.每周1到2次	A.散步、跑步┋C.体育舞蹈┋G.健身器活动	b.与我有一点相符	c.与我中等强度相符	b.与我有一点相符	c.与我中等强度相符	c.与我中等强度相符	c.与我中等强度相符	c.与我中等强度相符	c.与我中等强度相符	c.与我中等强度相符	c.与我中等强度相符	c.与我中等强度相符	c.与我中等强度相符	c.与我中等强度相符	c.与我中等强度相符	c.与我中等强度相符	是	是	是	是	是	是	是	是	是	是	是	是	是	是	是	符合	符合	不确定	符合	符合	符合	符合
43	2024/6/28 23:46:58	126秒	微信	N/A	107	女	18-20	本科在读	D.呼吸急促、出汗很多的大强度的，但不持久的运动（如打羽毛球、篮球、网球、足球等）	C.21至30分钟	E.每周1到2次	A.散步、跑步┋D.球类	b.与我有一点相符	c.与我中等强度相符	c.与我中等强度相符	c.与我中等强度相符	c.与我中等强度相符	b.与我有一点相符	b.与我有一点相符	c.与我中等强度相符	d.与我非常相符	c.与我中等强度相符	c.与我中等强度相符	c.与我中等强度相符	a.一点也不相符	d.与我非常相符	c.与我中等强度相符	是	是	否	否	是	是	是	是	是	是	是	是	否	是	否	符合	符合	符合	符合	符合	符合	符合
44	2024/6/28 23:47:14	403秒	微信	N/A	98	女	21-23	本科在读	A.轻微运动（如散步、做广播体操、打门球等）	D.31至59分钟	E.每周1到2次	A.散步、跑步┋D.球类┋H.游泳┋I.其他	c.与我中等强度相符	d.与我非常相符	c.与我中等强度相符	b.与我有一点相符	c.与我中等强度相符	b.与我有一点相符	b.与我有一点相符	c.与我中等强度相符	e.与我极其相符	a.一点也不相符	d.与我非常相符	b.与我有一点相符	b.与我有一点相符	b.与我有一点相符	b.与我有一点相符	是	否	是	是	否	否	否	是	否	否	否	是	是	是	是	符合	不确定	不符合	不确定	不符合	符合	符合
45	2024/6/28 23:48:53	138秒	微信	N/A	94	男	18-20	本科在读	A.轻微运动（如散步、做广播体操、打门球等）	C.21至30分钟	C.一个月2至3次	A.散步、跑步┋B.旅游、郊游┋I.其他	a.一点也不相符	b.与我有一点相符	c.与我中等强度相符	c.与我中等强度相符	b.与我有一点相符	d.与我非常相符	c.与我中等强度相符	b.与我有一点相符	d.与我非常相符	b.与我有一点相符	b.与我有一点相符	b.与我有一点相符	c.与我中等强度相符	c.与我中等强度相符	b.与我有一点相符	是	是	否	是	是	是	是	是	是	否	是	是	否	否	否	符合	符合	不确定	符合	符合	符合	符合
46	2024/6/28 23:51:38	175秒	微信	N/A	100	男	21-23	本科在读	B.小强度的不太紧张的运动（如消遣娱乐性的打排球、乒乓球、慢跑、打太极拳等）	C.21至30分钟	C.一个月2至3次	A.散步、跑步┋F.太极拳、养生术┋H.游泳	c.与我中等强度相符	c.与我中等强度相符	a.一点也不相符	c.与我中等强度相符	b.与我有一点相符	d.与我非常相符	c.与我中等强度相符	d.与我非常相符	d.与我非常相符	a.一点也不相符	c.与我中等强度相符	c.与我中等强度相符	c.与我中等强度相符	c.与我中等强度相符	a.一点也不相符	是	是	否	否	是	是	是	是	是	否	是	是	否	否	否	不确定	不确定	不确定	不确定	不确定	不确定	不确定
47	2024/6/28 23:54:13	191秒	微信	N/A	104	女	21-23	硕士在读	E.呼吸急促，出汗很多的大强度的持久的运动（如赛跑、成套健美操练习、游泳等）	D.31至59分钟	C.一个月2至3次	A.散步、跑步┋C.体育舞蹈┋G.健身器活动	b.与我有一点相符	b.与我有一点相符	a.一点也不相符	c.与我中等强度相符	b.与我有一点相符	b.与我有一点相符	e.与我极其相符	e.与我极其相符	e.与我极其相符	a.一点也不相符	e.与我极其相符	e.与我极其相符	e.与我极其相符	e.与我极其相符	a.一点也不相符	是	是	否	是	是	否	否	是	是	否	是	是	否	否	是	不确定	不确定	极不符合	极不符合	极不符合	不确定	不符合
48	2024/6/28 23:56:08	550秒	微信	N/A	93	女	21-23	本科在读	B.小强度的不太紧张的运动（如消遣娱乐性的打排球、乒乓球、慢跑、打太极拳等）	C.21至30分钟	C.一个月2至3次	A.散步、跑步	b.与我有一点相符	b.与我有一点相符	c.与我中等强度相符	d.与我非常相符	b.与我有一点相符	d.与我非常相符	d.与我非常相符	e.与我极其相符	e.与我极其相符	b.与我有一点相符	c.与我中等强度相符	b.与我有一点相符	b.与我有一点相符	d.与我非常相符	a.一点也不相符	否	否	否	否	是	是	否	否	是	是	否	否	否	否	是	符合	符合	不确定	不确定	不确定	符合	不符合
49	2024/6/28 23:56:38	182秒	微信	N/A	100	女	21-23	本科在读	B.小强度的不太紧张的运动（如消遣娱乐性的打排球、乒乓球、慢跑、打太极拳等）	B.11至20分钟	A.一个月1次以下	A.散步、跑步┋B.旅游、郊游┋F.太极拳、养生术┋H.游泳	c.与我中等强度相符	b.与我有一点相符	b.与我有一点相符	b.与我有一点相符	c.与我中等强度相符	c.与我中等强度相符	b.与我有一点相符	d.与我非常相符	e.与我极其相符	c.与我中等强度相符	b.与我有一点相符	d.与我非常相符	e.与我极其相符	e.与我极其相符	c.与我中等强度相符	是	是	否	是	是	是	是	是	是	是	是	是	否	否	是	不确定	不确定	极不符合	符合	极符合	极符合	不符合
50	2024/6/28 23:59:38	150秒	微信	N/A	97	男	21-23	硕士在读	A.轻微运动（如散步、做广播体操、打门球等）	A.10分钟以下	E.每周1到2次	D.球类┋E.跳绳	a.一点也不相符	c.与我中等强度相符	c.与我中等强度相符	b.与我有一点相符	b.与我有一点相符	c.与我中等强度相符	d.与我非常相符	c.与我中等强度相符	c.与我中等强度相符	b.与我有一点相符	c.与我中等强度相符	b.与我有一点相符	c.与我中等强度相符	d.与我非常相符	c.与我中等强度相符	否	否	是	否	否	否	否	否	否	否	否	否	是	否	是	符合	符合	符合	符合	符合	极符合	极符合
51	2024/6/29 0:04:29	114秒	微信	N/A	95	男	24-26	硕士在读	A.轻微运动（如散步、做广播体操、打门球等）	D.31至59分钟	B.每周3至5次	A.散步、跑步┋I.其他	b.与我有一点相符	b.与我有一点相符	b.与我有一点相符	b.与我有一点相符	b.与我有一点相符	b.与我有一点相符	b.与我有一点相符	b.与我有一点相符	b.与我有一点相符	b.与我有一点相符	b.与我有一点相符	b.与我有一点相符	b.与我有一点相符	b.与我有一点相符	b.与我有一点相符	是	是	否	否	是	是	是	是	是	否	是	是	否	是	是	符合	符合	符合	符合	符合	符合	符合
52	2024/6/29 0:08:16	192秒	微信	N/A	107	女	21-23	本科在读	B.小强度的不太紧张的运动（如消遣娱乐性的打排球、乒乓球、慢跑、打太极拳等）	C.21至30分钟	E.每周1到2次	C.体育舞蹈	c.与我中等强度相符	d.与我非常相符	c.与我中等强度相符	b.与我有一点相符	b.与我有一点相符	b.与我有一点相符	a.一点也不相符	e.与我极其相符	e.与我极其相符	b.与我有一点相符	b.与我有一点相符	e.与我极其相符	b.与我有一点相符	e.与我极其相符	a.一点也不相符	是	是	否	否	是	是	是	是	是	是	是	是	否	否	否	符合	符合	符合	符合	符合	不确定	不确定
53	2024/6/29 0:24:44	229秒	微信	N/A	107	男	24-26	硕士在读	D.呼吸急促、出汗很多的大强度的，但不持久的运动（如打羽毛球、篮球、网球、足球等）	E.60分钟以上	E.每周1到2次	B.旅游、郊游┋D.球类	b.与我有一点相符	c.与我中等强度相符	d.与我非常相符	c.与我中等强度相符	c.与我中等强度相符	c.与我中等强度相符	c.与我中等强度相符	d.与我非常相符	d.与我非常相符	b.与我有一点相符	a.一点也不相符	b.与我有一点相符	c.与我中等强度相符	d.与我非常相符	b.与我有一点相符	是	是	否	是	是	是	是	是	否	否	是	是	否	否	否	极符合	极符合	不确定	不确定	不符合	极符合	极符合
54	2024/6/29 0:27:32	185秒	微信	N/A	104	女	21-23	本科在读	E.呼吸急促，出汗很多的大强度的持久的运动（如赛跑、成套健美操练习、游泳等）	E.60分钟以上	E.每周1到2次	A.散步、跑步┋B.旅游、郊游┋H.游泳	a.一点也不相符	a.一点也不相符	c.与我中等强度相符	e.与我极其相符	b.与我有一点相符	c.与我中等强度相符	c.与我中等强度相符	e.与我极其相符	e.与我极其相符	a.一点也不相符	c.与我中等强度相符	c.与我中等强度相符	a.一点也不相符	d.与我非常相符	a.一点也不相符	是	是	否	是	是	是	是	是	是	是	是	是	否	是	否	符合	不确定	不符合	不符合	不符合	不确定	不符合
55	2024/6/29 0:34:38	138秒	微信	N/A	96	女	21-23	硕士在读	A.轻微运动（如散步、做广播体操、打门球等）	C.21至30分钟	C.一个月2至3次	A.散步、跑步	c.与我中等强度相符	d.与我非常相符	b.与我有一点相符	d.与我非常相符	c.与我中等强度相符	c.与我中等强度相符	b.与我有一点相符	d.与我非常相符	c.与我中等强度相符	c.与我中等强度相符	b.与我有一点相符	b.与我有一点相符	c.与我中等强度相符	c.与我中等强度相符	b.与我有一点相符	是	是	否	否	是	是	是	是	是	是	是	是	否	否	否	符合	不确定	不确定	不符合	不确定	符合	不确定
56	2024/6/29 0:46:13	137秒	微信	N/A	117	女	24-26	硕士在读	E.呼吸急促，出汗很多的大强度的持久的运动（如赛跑、成套健美操练习、游泳等）	D.31至59分钟	B.每周3至5次	H.游泳	c.与我中等强度相符	d.与我非常相符	c.与我中等强度相符	c.与我中等强度相符	c.与我中等强度相符	c.与我中等强度相符	c.与我中等强度相符	c.与我中等强度相符	c.与我中等强度相符	c.与我中等强度相符	c.与我中等强度相符	d.与我非常相符	c.与我中等强度相符	d.与我非常相符	b.与我有一点相符	是	是	否	否	是	否	是	是	是	是	是	是	是	否	是	极符合	符合	符合	符合	极符合	极符合	极符合
57	2024/6/29 0:48:43	199秒	微信	N/A	99	女	18-20	本科在读	B.小强度的不太紧张的运动（如消遣娱乐性的打排球、乒乓球、慢跑、打太极拳等）	C.21至30分钟	C.一个月2至3次	A.散步、跑步┋D.球类	b.与我有一点相符	c.与我中等强度相符	b.与我有一点相符	c.与我中等强度相符	c.与我中等强度相符	c.与我中等强度相符	c.与我中等强度相符	c.与我中等强度相符	d.与我非常相符	b.与我有一点相符	b.与我有一点相符	c.与我中等强度相符	b.与我有一点相符	d.与我非常相符	a.一点也不相符	是	否	否	是	是	是	否	是	是	否	是	是	是	否	是	符合	符合	不确定	不确定	不确定	符合	不确定
58	2024/6/29 0:49:31	253秒	微信	N/A	84	女	24-26	硕士在读	C.中等强度较激烈持久的运动（如骑自行车跑步打乒乓球等）	C.21至30分钟	A.一个月1次以下	B.旅游、郊游┋C.体育舞蹈┋E.跳绳	a.一点也不相符	a.一点也不相符	b.与我有一点相符	b.与我有一点相符	a.一点也不相符	b.与我有一点相符	a.一点也不相符	c.与我中等强度相符	d.与我非常相符	b.与我有一点相符	b.与我有一点相符	a.一点也不相符	a.一点也不相符	e.与我极其相符	b.与我有一点相符	是	是	否	是	是	是	否	是	是	否	是	是	否	否	否	不确定	不确定	不确定	不符合	不确定	不符合	不确定
59	2024/6/29 1:06:58	265秒	微信	N/A	111	男	21-23	本科在读	C.中等强度较激烈持久的运动（如骑自行车跑步打乒乓球等）	D.31至59分钟	C.一个月2至3次	A.散步、跑步┋B.旅游、郊游┋D.球类┋F.太极拳、养生术	d.与我非常相符	d.与我非常相符	b.与我有一点相符	c.与我中等强度相符	c.与我中等强度相符	c.与我中等强度相符	c.与我中等强度相符	d.与我非常相符	d.与我非常相符	b.与我有一点相符	d.与我非常相符	d.与我非常相符	d.与我非常相符	d.与我非常相符	a.一点也不相符	否	是	否	否	否	否	否	否	是	是	是	是	是	否	是	符合	不确定	不确定	不确定	符合	符合	符合
60	2024/6/29 4:24:56	380秒	微信	N/A	86	男	24-26	硕士在读	B.小强度的不太紧张的运动（如消遣娱乐性的打排球、乒乓球、慢跑、打太极拳等）	C.21至30分钟	C.一个月2至3次	D.球类┋E.跳绳	b.与我有一点相符	b.与我有一点相符	a.一点也不相符	c.与我中等强度相符	a.一点也不相符	b.与我有一点相符	a.一点也不相符	b.与我有一点相符	c.与我中等强度相符	c.与我中等强度相符	c.与我中等强度相符	b.与我有一点相符	b.与我有一点相符	c.与我中等强度相符	c.与我中等强度相符	否	否	否	否	否	否	否	是	是	否	是	是	否	否	是	符合	符合	不符合	不确定	不确定	符合	符合
61	2024/6/29 5:32:30	129秒	微信	N/A	99	女	21-23	硕士在读	A.轻微运动（如散步、做广播体操、打门球等）	B.11至20分钟	B.每周3至5次	B.旅游、郊游┋D.球类	c.与我中等强度相符	c.与我中等强度相符	a.一点也不相符	d.与我非常相符	e.与我极其相符	e.与我极其相符	e.与我极其相符	d.与我非常相符	a.一点也不相符	d.与我非常相符	e.与我极其相符	d.与我非常相符	e.与我极其相符	d.与我非常相符	c.与我中等强度相符	是	否	否	是	是	是	否	否	否	是	否	是	否	是	是	不确定	不符合	符合	不确定	不确定	符合	不确定
62	2024/6/29 8:07:14	183秒	微信	N/A	77	女	24-26	硕士在读	C.中等强度较激烈持久的运动（如骑自行车跑步打乒乓球等）	E.60分钟以上	B.每周3至5次	G.健身器活动┋I.其他	a.一点也不相符	a.一点也不相符	d.与我非常相符	a.一点也不相符	a.一点也不相符	a.一点也不相符	a.一点也不相符	c.与我中等强度相符	b.与我有一点相符	d.与我非常相符	a.一点也不相符	a.一点也不相符	a.一点也不相符	a.一点也不相符	d.与我非常相符	是	是	否	是	是	是	否	否	是	是	是	是	否	否	否	符合	不确定	符合	不确定	不确定	不确定	不确定
63	2024/6/29 9:15:59	264秒	微信	N/A	83	男	24-26	本科在读	B.小强度的不太紧张的运动（如消遣娱乐性的打排球、乒乓球、慢跑、打太极拳等）	C.21至30分钟	A.一个月1次以下	A.散步、跑步┋D.球类	b.与我有一点相符	d.与我非常相符	d.与我非常相符	b.与我有一点相符	b.与我有一点相符	b.与我有一点相符	a.一点也不相符	d.与我非常相符	b.与我有一点相符	b.与我有一点相符	c.与我中等强度相符	c.与我中等强度相符	b.与我有一点相符	b.与我有一点相符	b.与我有一点相符	是	否	否	否	是	是	是	是	否	是	是	是	否	是	否	符合	不确定	不符合	不符合	不符合	不符合	不确定
64	2024/6/29 10:25:16	1272秒	微信	N/A	96	女	21-23	本科在读	B.小强度的不太紧张的运动（如消遣娱乐性的打排球、乒乓球、慢跑、打太极拳等）	C.21至30分钟	C.一个月2至3次	A.散步、跑步┋B.旅游、郊游┋D.球类┋E.跳绳┋H.游泳┋I.其他	b.与我有一点相符	b.与我有一点相符	c.与我中等强度相符	b.与我有一点相符	b.与我有一点相符	b.与我有一点相符	a.一点也不相符	b.与我有一点相符	c.与我中等强度相符	b.与我有一点相符	b.与我有一点相符	b.与我有一点相符	c.与我中等强度相符	c.与我中等强度相符	a.一点也不相符	否	是	否	是	是	是	是	是	是	否	是	是	否	否	否	符合	符合	不确定	符合	符合	符合	符合
65	2024/6/29 10:37:29	182秒	微信	N/A	84	女	18-20	本科在读	A.轻微运动（如散步、做广播体操、打门球等）	D.31至59分钟	C.一个月2至3次	A.散步、跑步┋C.体育舞蹈	a.一点也不相符	b.与我有一点相符	d.与我非常相符	a.一点也不相符	b.与我有一点相符	b.与我有一点相符	b.与我有一点相符	b.与我有一点相符	a.一点也不相符	a.一点也不相符	c.与我中等强度相符	a.一点也不相符	b.与我有一点相符	b.与我有一点相符	b.与我有一点相符	否	否	是	否	是	否	否	否	否	否	是	否	否	否	是	符合	符合	不确定	符合	符合	符合	符合
66	2024/6/29 11:26:02	242秒	微信	N/A	103	男	21-23	本科在读	D.呼吸急促、出汗很多的大强度的，但不持久的运动（如打羽毛球、篮球、网球、足球等）	C.21至30分钟	C.一个月2至3次	D.球类	b.与我有一点相符	b.与我有一点相符	e.与我极其相符	e.与我极其相符	b.与我有一点相符	b.与我有一点相符	a.一点也不相符	d.与我非常相符	e.与我极其相符	a.一点也不相符	b.与我有一点相符	d.与我非常相符	c.与我中等强度相符	d.与我非常相符	c.与我中等强度相符	是	是	否	否	是	是	是	是	是	是	是	是	否	否	是	符合	极符合	不确定	不符合	不确定	符合	不确定
67	2024/6/29 11:26:56	240秒	微信	N/A	103	男	21-23	本科在读	B.小强度的不太紧张的运动（如消遣娱乐性的打排球、乒乓球、慢跑、打太极拳等）	D.31至59分钟	E.每周1到2次	A.散步、跑步┋D.球类┋E.跳绳┋F.太极拳、养生术┋G.健身器活动	b.与我有一点相符	c.与我中等强度相符	b.与我有一点相符	d.与我非常相符	c.与我中等强度相符	b.与我有一点相符	b.与我有一点相符	d.与我非常相符	d.与我非常相符	b.与我有一点相符	d.与我非常相符	e.与我极其相符	c.与我中等强度相符	e.与我极其相符	b.与我有一点相符	是	是	否	是	是	是	是	是	是	否	是	是	否	否	否	符合	符合	极不符合	极不符合	不符合	符合	不确定
68	2024/6/29 11:29:30	192秒	微信	N/A	100	女	21-23	硕士在读	A.轻微运动（如散步、做广播体操、打门球等）	D.31至59分钟	B.每周3至5次	A.散步、跑步┋B.旅游、郊游	b.与我有一点相符	b.与我有一点相符	d.与我非常相符	d.与我非常相符	c.与我中等强度相符	d.与我非常相符	c.与我中等强度相符	c.与我中等强度相符	e.与我极其相符	c.与我中等强度相符	b.与我有一点相符	c.与我中等强度相符	b.与我有一点相符	c.与我中等强度相符	b.与我有一点相符	是	是	是	否	是	是	是	是	是	否	是	是	否	否	否	符合	符合	符合	符合	符合	符合	符合
69	2024/6/29 11:30:52	366秒	微信	N/A	104	女	18-20	本科在读	D.呼吸急促、出汗很多的大强度的，但不持久的运动（如打羽毛球、篮球、网球、足球等）	C.21至30分钟	B.每周3至5次	C.体育舞蹈	a.一点也不相符	c.与我中等强度相符	b.与我有一点相符	e.与我极其相符	c.与我中等强度相符	c.与我中等强度相符	c.与我中等强度相符	e.与我极其相符	d.与我非常相符	b.与我有一点相符	d.与我非常相符	d.与我非常相符	d.与我非常相符	e.与我极其相符	b.与我有一点相符	是	否	否	否	否	否	是	是	否	否	是	是	是	否	否	符合	不确定	不符合	不符合	符合	符合	不确定
70	2024/6/29 11:32:31	128秒	微信	N/A	97	男	21-23	本科在读	A.轻微运动（如散步、做广播体操、打门球等）	C.21至30分钟	E.每周1到2次	G.健身器活动┋I.其他	c.与我中等强度相符	c.与我中等强度相符	b.与我有一点相符	b.与我有一点相符	c.与我中等强度相符	b.与我有一点相符	b.与我有一点相符	b.与我有一点相符	c.与我中等强度相符	b.与我有一点相符	b.与我有一点相符	c.与我中等强度相符	c.与我中等强度相符	b.与我有一点相符	a.一点也不相符	是	否	否	否	是	否	否	否	否	是	是	是	否	否	否	符合	符合	不确定	符合	符合	符合	符合
71	2024/6/29 11:34:07	155秒	微信	N/A	101	女	21-23	本科在读	A.轻微运动（如散步、做广播体操、打门球等）	C.21至30分钟	C.一个月2至3次	A.散步、跑步┋F.太极拳、养生术┋H.游泳	c.与我中等强度相符	c.与我中等强度相符	b.与我有一点相符	a.一点也不相符	a.一点也不相符	a.一点也不相符	a.一点也不相符	b.与我有一点相符	d.与我非常相符	c.与我中等强度相符	c.与我中等强度相符	c.与我中等强度相符	c.与我中等强度相符	c.与我中等强度相符	c.与我中等强度相符	是	是	否	是	是	是	是	是	是	是	是	是	是	否	否	符合	符合	符合	符合	符合	符合	符合
72	2024/6/29 11:34:46	191秒	微信	N/A	106	男	21-23	本科在读	B.小强度的不太紧张的运动（如消遣娱乐性的打排球、乒乓球、慢跑、打太极拳等）	B.11至20分钟	C.一个月2至3次	A.散步、跑步┋D.球类┋H.游泳	d.与我非常相符	d.与我非常相符	c.与我中等强度相符	b.与我有一点相符	b.与我有一点相符	c.与我中等强度相符	b.与我有一点相符	d.与我非常相符	e.与我极其相符	b.与我有一点相符	b.与我有一点相符	c.与我中等强度相符	c.与我中等强度相符	b.与我有一点相符	b.与我有一点相符	是	是	否	否	是	是	否	是	否	是	是	是	是	否	否	符合	符合	不确定	符合	极符合	极符合	极符合
73	2024/6/29 12:11:14	657秒	微信	N/A	94	女	21-23	本科在读	A.轻微运动（如散步、做广播体操、打门球等）	C.21至30分钟	E.每周1到2次	A.散步、跑步┋F.太极拳、养生术	b.与我有一点相符	b.与我有一点相符	c.与我中等强度相符	b.与我有一点相符	b.与我有一点相符	c.与我中等强度相符	a.一点也不相符	c.与我中等强度相符	d.与我非常相符	d.与我非常相符	b.与我有一点相符	b.与我有一点相符	b.与我有一点相符	c.与我中等强度相符	b.与我有一点相符	是	是	否	是	是	是	是	是	是	是	是	是	否	否	否	符合	符合	符合	符合	符合	不确定	符合
74	2024/6/29 12:32:40	110秒	微信	N/A	99	男	18-20	本科在读	B.小强度的不太紧张的运动（如消遣娱乐性的打排球、乒乓球、慢跑、打太极拳等）	B.11至20分钟	C.一个月2至3次	A.散步、跑步┋I.其他	a.一点也不相符	c.与我中等强度相符	b.与我有一点相符	c.与我中等强度相符	c.与我中等强度相符	c.与我中等强度相符	c.与我中等强度相符	c.与我中等强度相符	e.与我极其相符	e.与我极其相符	e.与我极其相符	e.与我极其相符	c.与我中等强度相符	e.与我极其相符	c.与我中等强度相符	是	是	否	是	是	是	否	是	是	是	是	是	否	否	是	符合	不确定	不确定	不确定	不确定	不确定	不确定
75	2024/6/29 13:19:06	98秒	微信	N/A	116	男	21-23	本科在读	A.轻微运动（如散步、做广播体操、打门球等）	B.11至20分钟	B.每周3至5次	A.散步、跑步┋D.球类┋G.健身器活动	e.与我极其相符	e.与我极其相符	b.与我有一点相符	e.与我极其相符	e.与我极其相符	e.与我极其相符	e.与我极其相符	e.与我极其相符	e.与我极其相符	e.与我极其相符	e.与我极其相符	d.与我非常相符	d.与我非常相符	e.与我极其相符	c.与我中等强度相符	否	否	否	是	是	是	否	是	是	是	否	是	是	是	是	符合	符合	不确定	不确定	符合	符合	极符合
76	2024/6/29 13:37:24	140秒	手机提交	直接访问	101	女	18-20	本科在读	B.小强度的不太紧张的运动（如消遣娱乐性的打排球、乒乓球、慢跑、打太极拳等）	E.60分钟以上	E.每周1到2次	A.散步、跑步┋D.球类	b.与我有一点相符	c.与我中等强度相符	c.与我中等强度相符	b.与我有一点相符	b.与我有一点相符	d.与我非常相符	a.一点也不相符	c.与我中等强度相符	d.与我非常相符	c.与我中等强度相符	c.与我中等强度相符	b.与我有一点相符	c.与我中等强度相符	c.与我中等强度相符	b.与我有一点相符	是	是	否	否	是	是	是	是	是	是	是	是	否	否	是	符合	符合	不确定	符合	符合	符合	符合
77	2024/6/29 14:35:02	150秒	微信	N/A	101	男	21-23	本科在读	C.中等强度较激烈持久的运动（如骑自行车跑步打乒乓球等）	D.31至59分钟	C.一个月2至3次	A.散步、跑步	b.与我有一点相符	b.与我有一点相符	d.与我非常相符	b.与我有一点相符	b.与我有一点相符	b.与我有一点相符	b.与我有一点相符	d.与我非常相符	b.与我有一点相符	b.与我有一点相符	b.与我有一点相符	b.与我有一点相符	b.与我有一点相符	c.与我中等强度相符	b.与我有一点相符	是	是	否	是	是	是	是	是	是	否	是	是	否	否	否	极符合	极符合	极符合	符合	不确定	符合	符合
78	2024/6/29 15:37:54	168秒	微信	N/A	80	男	18-20	本科在读	A.轻微运动（如散步、做广播体操、打门球等）	A.10分钟以下	B.每周3至5次	A.散步、跑步	b.与我有一点相符	b.与我有一点相符	b.与我有一点相符	b.与我有一点相符	b.与我有一点相符	c.与我中等强度相符	b.与我有一点相符	b.与我有一点相符	c.与我中等强度相符	b.与我有一点相符	b.与我有一点相符	b.与我有一点相符	b.与我有一点相符	b.与我有一点相符	b.与我有一点相符	是	是	否	否	是	否	否	是	是	否	是	是	否	是	否	不确定	不确定	不确定	不确定	不确定	不确定	不确定
79	2024/6/29 15:43:12	135秒	微信	N/A	103	女	18-20	本科在读	B.小强度的不太紧张的运动（如消遣娱乐性的打排球、乒乓球、慢跑、打太极拳等）	B.11至20分钟	C.一个月2至3次	A.散步、跑步┋E.跳绳	e.与我极其相符	e.与我极其相符	a.一点也不相符	e.与我极其相符	e.与我极其相符	a.一点也不相符	b.与我有一点相符	e.与我极其相符	e.与我极其相符	a.一点也不相符	e.与我极其相符	e.与我极其相符	e.与我极其相符	e.与我极其相符	a.一点也不相符	否	否	是	否	否	否	否	否	否	是	否	否	是	否	是	不确定	不符合	极不符合	不确定	极不符合	不符合	极不符合
80	2024/6/30 13:26:50	160秒	微信	N/A	93	女	18-20	本科在读	B.小强度的不太紧张的运动（如消遣娱乐性的打排球、乒乓球、慢跑、打太极拳等）	D.31至59分钟	C.一个月2至3次	A.散步、跑步┋B.旅游、郊游┋D.球类┋G.健身器活动	c.与我中等强度相符	b.与我有一点相符	b.与我有一点相符	b.与我有一点相符	b.与我有一点相符	b.与我有一点相符	b.与我有一点相符	b.与我有一点相符	b.与我有一点相符	b.与我有一点相符	b.与我有一点相符	b.与我有一点相符	b.与我有一点相符	b.与我有一点相符	b.与我有一点相符	是	是	是	否	是	否	是	是	是	否	是	是	是	否	是	不确定	符合	不确定	符合	符合	符合	不确定
81	2024/6/30 13:27:08	131秒	微信	N/A	99	女	18-20	本科在读	C.中等强度较激烈持久的运动（如骑自行车跑步打乒乓球等）	C.21至30分钟	E.每周1到2次	A.散步、跑步┋B.旅游、郊游┋E.跳绳┋H.游泳	b.与我有一点相符	b.与我有一点相符	d.与我非常相符	c.与我中等强度相符	b.与我有一点相符	a.一点也不相符	c.与我中等强度相符	b.与我有一点相符	e.与我极其相符	c.与我中等强度相符	a.一点也不相符	b.与我有一点相符	b.与我有一点相符	b.与我有一点相符	c.与我中等强度相符	是	是	否	是	是	是	是	是	是	否	是	是	否	否	否	符合	符合	符合	符合	符合	符合	符合
82	2024/6/30 20:11:04	113秒	手机提交	直接访问	120	男	18-20	本科在读	B.小强度的不太紧张的运动（如消遣娱乐性的打排球、乒乓球、慢跑、打太极拳等）	B.11至20分钟	E.每周1到2次	A.散步、跑步┋E.跳绳	b.与我有一点相符	e.与我极其相符	a.一点也不相符	c.与我中等强度相符	e.与我极其相符	e.与我极其相符	e.与我极其相符	e.与我极其相符	e.与我极其相符	e.与我极其相符	e.与我极其相符	e.与我极其相符	e.与我极其相符	e.与我极其相符	e.与我极其相符	是	是	是	是	是	是	是	是	是	是	是	是	否	否	是	极符合	极符合	符合	符合	符合	符合	符合
83	2024/6/30 20:11:07	149秒	手机提交	直接访问	106	女	18-20	本科在读	B.小强度的不太紧张的运动（如消遣娱乐性的打排球、乒乓球、慢跑、打太极拳等）	C.21至30分钟	C.一个月2至3次	D.球类┋E.跳绳	b.与我有一点相符	c.与我中等强度相符	b.与我有一点相符	d.与我非常相符	d.与我非常相符	c.与我中等强度相符	c.与我中等强度相符	c.与我中等强度相符	c.与我中等强度相符	c.与我中等强度相符	c.与我中等强度相符	c.与我中等强度相符	d.与我非常相符	d.与我非常相符	c.与我中等强度相符	是	是	否	否	是	是	否	是	是	是	是	是	否	否	否	符合	符合	符合	符合	符合	符合	符合
84	2024/6/30 20:11:12	188秒	手机提交	直接访问	99	男	18-20	本科在读	B.小强度的不太紧张的运动（如消遣娱乐性的打排球、乒乓球、慢跑、打太极拳等）	C.21至30分钟	E.每周1到2次	A.散步、跑步┋B.旅游、郊游┋C.体育舞蹈┋D.球类┋F.太极拳、养生术┋G.健身器活动	b.与我有一点相符	b.与我有一点相符	d.与我非常相符	e.与我极其相符	b.与我有一点相符	d.与我非常相符	b.与我有一点相符	e.与我极其相符	e.与我极其相符	c.与我中等强度相符	c.与我中等强度相符	d.与我非常相符	c.与我中等强度相符	d.与我非常相符	c.与我中等强度相符	是	是	是	否	否	否	否	否	否	是	是	否	是	否	是	符合	符合	不符合	不确定	不确定	符合	符合
85	2024/6/30 20:14:37	118秒	手机提交	直接访问	94	女	18-20	本科在读	B.小强度的不太紧张的运动（如消遣娱乐性的打排球、乒乓球、慢跑、打太极拳等）	C.21至30分钟	C.一个月2至3次	A.散步、跑步┋D.球类┋E.跳绳	b.与我有一点相符	b.与我有一点相符	b.与我有一点相符	c.与我中等强度相符	a.一点也不相符	b.与我有一点相符	c.与我中等强度相符	d.与我非常相符	d.与我非常相符	c.与我中等强度相符	b.与我有一点相符	c.与我中等强度相符	b.与我有一点相符	d.与我非常相符	b.与我有一点相符	是	是	否	是	是	是	是	是	是	否	是	是	否	否	否	不确定	不确定	不符合	不确定	不符合	符合	不确定
86	2024/6/30 20:19:51	188秒	手机提交	直接访问	96	女	21-23	本科在读	E.呼吸急促，出汗很多的大强度的持久的运动（如赛跑、成套健美操练习、游泳等）	C.21至30分钟	B.每周3至5次	C.体育舞蹈	b.与我有一点相符	b.与我有一点相符	a.一点也不相符	b.与我有一点相符	c.与我中等强度相符	b.与我有一点相符	b.与我有一点相符	e.与我极其相符	e.与我极其相符	a.一点也不相符	b.与我有一点相符	e.与我极其相符	b.与我有一点相符	e.与我极其相符	a.一点也不相符	是	是	否	是	是	否	是	否	是	是	是	是	否	否	否	不确定	不符合	极不符合	不符合	极不符合	不确定	不符合
87	2024/6/30 21:28:02	120秒	手机提交	直接访问	111	女	18-20	本科在读	A.轻微运动（如散步、做广播体操、打门球等）	A.10分钟以下	A.一个月1次以下	A.散步、跑步┋F.太极拳、养生术	b.与我有一点相符	d.与我非常相符	a.一点也不相符	c.与我中等强度相符	c.与我中等强度相符	c.与我中等强度相符	c.与我中等强度相符	d.与我非常相符	d.与我非常相符	a.一点也不相符	c.与我中等强度相符	d.与我非常相符	c.与我中等强度相符	d.与我非常相符	a.一点也不相符	是	是	否	是	是	是	是	是	是	是	是	是	是	是	否	符合	符合	符合	符合	符合	符合	符合
88	2024/6/30 21:48:52	3045秒	手机提交	直接访问	98	女	21-23	本科在读	C.中等强度较激烈持久的运动（如骑自行车跑步打乒乓球等）	D.31至59分钟	C.一个月2至3次	B.旅游、郊游┋D.球类┋H.游泳	c.与我中等强度相符	c.与我中等强度相符	b.与我有一点相符	d.与我非常相符	c.与我中等强度相符	b.与我有一点相符	a.一点也不相符	d.与我非常相符	d.与我非常相符	b.与我有一点相符	d.与我非常相符	d.与我非常相符	b.与我有一点相符	d.与我非常相符	a.一点也不相符	是	否	否	是	是	否	否	否	否	否	是	否	是	否	是	符合	不确定	不符合	不确定	不确定	不确定	不符合
89	2024/6/30 22:39:05	174秒	手机提交	直接访问	92	女	21-23	硕士在读	A.轻微运动（如散步、做广播体操、打门球等）	C.21至30分钟	B.每周3至5次	A.散步、跑步┋D.球类	b.与我有一点相符	d.与我非常相符	b.与我有一点相符	d.与我非常相符	d.与我非常相符	a.一点也不相符	b.与我有一点相符	d.与我非常相符	c.与我中等强度相符	c.与我中等强度相符	c.与我中等强度相符	c.与我中等强度相符	b.与我有一点相符	c.与我中等强度相符	b.与我有一点相符	否	否	是	否	是	否	否	否	否	是	否	否	是	否	是	符合	不确定	不确定	不确定	不确定	不确定	不确定
90	2024/6/30 23:47:47	285秒	手机提交	直接访问	88	女	24-26	硕士在读	B.小强度的不太紧张的运动（如消遣娱乐性的打排球、乒乓球、慢跑、打太极拳等）	C.21至30分钟	B.每周3至5次	A.散步、跑步┋D.球类┋H.游泳	b.与我有一点相符	b.与我有一点相符	b.与我有一点相符	b.与我有一点相符	b.与我有一点相符	b.与我有一点相符	c.与我中等强度相符	c.与我中等强度相符	d.与我非常相符	c.与我中等强度相符	c.与我中等强度相符	c.与我中等强度相符	c.与我中等强度相符	d.与我非常相符	c.与我中等强度相符	是	是	否	是	否	否	是	是	是	是	是	是	否	是	否	不确定	不确定	不符合	不符合	不符合	不确定	不确定
91	2024/7/1 6:55:54	205秒	手机提交	直接访问	91	女	18-20	本科在读	B.小强度的不太紧张的运动（如消遣娱乐性的打排球、乒乓球、慢跑、打太极拳等）	C.21至30分钟	A.一个月1次以下	A.散步、跑步┋E.跳绳	b.与我有一点相符	c.与我中等强度相符	a.一点也不相符	c.与我中等强度相符	b.与我有一点相符	a.一点也不相符	b.与我有一点相符	c.与我中等强度相符	d.与我非常相符	a.一点也不相符	b.与我有一点相符	b.与我有一点相符	c.与我中等强度相符	d.与我非常相符	a.一点也不相符	否	否	是	否	否	是	否	否	否	是	否	是	否	否	是	符合	不确定	不符合	不确定	不确定	符合	不符合
92	2024/7/1 8:43:47	147秒	微信	N/A	96	女	24-26	硕士在读	E.呼吸急促，出汗很多的大强度的持久的运动（如赛跑、成套健美操练习、游泳等）	D.31至59分钟	B.每周3至5次	C.体育舞蹈┋I.其他	b.与我有一点相符	d.与我非常相符	a.一点也不相符	b.与我有一点相符	a.一点也不相符	a.一点也不相符	a.一点也不相符	d.与我非常相符	d.与我非常相符	a.一点也不相符	d.与我非常相符	a.一点也不相符	d.与我非常相符	d.与我非常相符	a.一点也不相符	否	否	是	否	否	否	否	否	否	是	否	是	是	是	是	符合	符合	不符合	不符合	不符合	符合	不符合
93	2024/7/1 10:01:47	94秒	手机提交	直接访问	94	女	24-26	硕士在读	A.轻微运动（如散步、做广播体操、打门球等）	B.11至20分钟	C.一个月2至3次	A.散步、跑步	b.与我有一点相符	b.与我有一点相符	b.与我有一点相符	b.与我有一点相符	b.与我有一点相符	c.与我中等强度相符	c.与我中等强度相符	b.与我有一点相符	b.与我有一点相符	c.与我中等强度相符	b.与我有一点相符	b.与我有一点相符	b.与我有一点相符	b.与我有一点相符	c.与我中等强度相符	是	是	是	是	是	是	是	是	是	是	是	是	否	否	否	符合	符合	不确定	符合	符合	符合	极符合
94	2024/7/1 10:26:24	95秒	微信	N/A	118	男	24-26	本科在读	A.轻微运动（如散步、做广播体操、打门球等）	D.31至59分钟	B.每周3至5次	B.旅游、郊游┋C.体育舞蹈┋E.跳绳┋G.健身器活动	c.与我中等强度相符	c.与我中等强度相符	c.与我中等强度相符	d.与我非常相符	e.与我极其相符	d.与我非常相符	d.与我非常相符	e.与我极其相符	d.与我非常相符	e.与我极其相符	e.与我极其相符	d.与我非常相符	d.与我非常相符	c.与我中等强度相符	d.与我非常相符	是	是	是	是	是	是	是	是	是	是	是	是	是	是	是	符合	极符合	符合	符合	极符合	符合	符合
95	2024/7/1 10:31:14	109秒	微信	N/A	117	女	21-23	硕士在读	A.轻微运动（如散步、做广播体操、打门球等）	C.21至30分钟	A.一个月1次以下	A.散步、跑步┋B.旅游、郊游┋E.跳绳	d.与我非常相符	e.与我极其相符	a.一点也不相符	e.与我极其相符	d.与我非常相符	e.与我极其相符	d.与我非常相符	e.与我极其相符	d.与我非常相符	a.一点也不相符	e.与我极其相符	e.与我极其相符	d.与我非常相符	e.与我极其相符	d.与我非常相符	是	否	是	否	否	否	是	否	否	是	是	是	是	否	是	符合	符合	极符合	符合	极符合	符合	极符合
96	2024/7/1 10:38:39	116秒	手机提交	直接访问	97	女	24-26	硕士在读	B.小强度的不太紧张的运动（如消遣娱乐性的打排球、乒乓球、慢跑、打太极拳等）	C.21至30分钟	B.每周3至5次	D.球类┋F.太极拳、养生术	b.与我有一点相符	b.与我有一点相符	c.与我中等强度相符	c.与我中等强度相符	b.与我有一点相符	d.与我非常相符	b.与我有一点相符	c.与我中等强度相符	c.与我中等强度相符	b.与我有一点相符	a.一点也不相符	c.与我中等强度相符	a.一点也不相符	c.与我中等强度相符	c.与我中等强度相符	是	是	否	是	是	是	是	是	是	否	是	是	否	否	否	符合	符合	符合	极符合	符合	符合	符合
97	2024/7/1 11:34:58	530秒	微信	N/A	102	女	21-23	本科在读	A.轻微运动（如散步、做广播体操、打门球等）	C.21至30分钟	C.一个月2至3次	A.散步、跑步┋B.旅游、郊游┋G.健身器活动	b.与我有一点相符	d.与我非常相符	c.与我中等强度相符	d.与我非常相符	b.与我有一点相符	b.与我有一点相符	c.与我中等强度相符	c.与我中等强度相符	c.与我中等强度相符	b.与我有一点相符	c.与我中等强度相符	a.一点也不相符	b.与我有一点相符	d.与我非常相符	b.与我有一点相符	是	是	是	是	是	是	否	是	是	是	是	是	否	否	否	符合	符合	不确定	符合	符合	符合	符合
98	2024/7/1 12:18:32	45秒	手机提交	直接访问	72	女	18-20	本科在读	A.轻微运动（如散步、做广播体操、打门球等）	B.11至20分钟	B.每周3至5次	A.散步、跑步┋B.旅游、郊游┋C.体育舞蹈	d.与我非常相符	b.与我有一点相符	b.与我有一点相符	c.与我中等强度相符	b.与我有一点相符	b.与我有一点相符	b.与我有一点相符	c.与我中等强度相符	b.与我有一点相符	a.一点也不相符	c.与我中等强度相符	b.与我有一点相符	b.与我有一点相符	b.与我有一点相符	a.一点也不相符	是	是	是	是	是	是	否	否	是	是	是	是	否	是	是	极不符合	极不符合	极不符合	极不符合	极不符合	极不符合	极不符合
99	2024/7/1 12:20:23	219秒	微信	N/A	107	女	24-26	硕士在读	B.小强度的不太紧张的运动（如消遣娱乐性的打排球、乒乓球、慢跑、打太极拳等）	C.21至30分钟	E.每周1到2次	A.散步、跑步┋B.旅游、郊游┋F.太极拳、养生术┋H.游泳	c.与我中等强度相符	d.与我非常相符	c.与我中等强度相符	d.与我非常相符	d.与我非常相符	c.与我中等强度相符	b.与我有一点相符	e.与我极其相符	d.与我非常相符	b.与我有一点相符	c.与我中等强度相符	d.与我非常相符	c.与我中等强度相符	d.与我非常相符	b.与我有一点相符	是	是	否	是	是	是	是	是	是	是	是	否	否	否	否	符合	不确定	不确定	不确定	不符合	符合	不确定
100	2024/7/1 13:15:15	203秒	微信	N/A	106	男	18-20	本科在读	D.呼吸急促、出汗很多的大强度的，但不持久的运动（如打羽毛球、篮球、网球、足球等）	E.60分钟以上	E.每周1到2次	A.散步、跑步┋B.旅游、郊游┋D.球类┋G.健身器活动┋H.游泳	b.与我有一点相符	c.与我中等强度相符	c.与我中等强度相符	b.与我有一点相符	c.与我中等强度相符	c.与我中等强度相符	b.与我有一点相符	c.与我中等强度相符	c.与我中等强度相符	b.与我有一点相符	c.与我中等强度相符	c.与我中等强度相符	c.与我中等强度相符	d.与我非常相符	c.与我中等强度相符	是	是	否	是	是	是	是	是	是	是	是	是	否	否	否	符合	不确定	不确定	符合	符合	符合	符合
101	2024/7/1 15:01:20	69秒	微信	N/A	102	女	21-23	本科在读	C.中等强度较激烈持久的运动（如骑自行车跑步打乒乓球等）	E.60分钟以上	C.一个月2至3次	A.散步、跑步	d.与我非常相符	c.与我中等强度相符	b.与我有一点相符	c.与我中等强度相符	d.与我非常相符	d.与我非常相符	d.与我非常相符	c.与我中等强度相符	d.与我非常相符	d.与我非常相符	b.与我有一点相符	b.与我有一点相符	c.与我中等强度相符	c.与我中等强度相符	c.与我中等强度相符	是	是	是	是	是	是	是	是	是	是	是	是	是	是	是	不确定	不确定	不确定	不确定	不确定	不确定	不确定
102	2024/7/1 15:03:43	232秒	微信	N/A	100	男	18-20	本科在读	D.呼吸急促、出汗很多的大强度的，但不持久的运动（如打羽毛球、篮球、网球、足球等）	D.31至59分钟	B.每周3至5次	A.散步、跑步┋B.旅游、郊游┋D.球类	c.与我中等强度相符	c.与我中等强度相符	c.与我中等强度相符	c.与我中等强度相符	c.与我中等强度相符	c.与我中等强度相符	c.与我中等强度相符	d.与我非常相符	b.与我有一点相符	c.与我中等强度相符	c.与我中等强度相符	c.与我中等强度相符	c.与我中等强度相符	c.与我中等强度相符	c.与我中等强度相符	是	是	否	是	是	是	是	是	是	否	是	是	否	否	否	符合	不确定	不确定	符合	不确定	不确定	符合
103	2024/7/1 15:07:50	67秒	微信	N/A	98	女	18-20	本科在读	B.小强度的不太紧张的运动（如消遣娱乐性的打排球、乒乓球、慢跑、打太极拳等）	B.11至20分钟	E.每周1到2次	A.散步、跑步	c.与我中等强度相符	c.与我中等强度相符	c.与我中等强度相符	c.与我中等强度相符	d.与我非常相符	a.一点也不相符	b.与我有一点相符	c.与我中等强度相符	c.与我中等强度相符	d.与我非常相符	c.与我中等强度相符	c.与我中等强度相符	d.与我非常相符	c.与我中等强度相符	a.一点也不相符	是	是	是	是	是	否	否	是	是	否	否	否	否	是	否	符合	不确定	不确定	不确定	不确定	不确定	不确定
104	2024/7/1 18:09:12	327秒	微信	N/A	76	女	24-26	硕士在读	B.小强度的不太紧张的运动（如消遣娱乐性的打排球、乒乓球、慢跑、打太极拳等）	C.21至30分钟	C.一个月2至3次	A.散步、跑步┋B.旅游、郊游┋D.球类┋G.健身器活动	a.一点也不相符	a.一点也不相符	e.与我极其相符	b.与我有一点相符	a.一点也不相符	d.与我非常相符	b.与我有一点相符	c.与我中等强度相符	b.与我有一点相符	d.与我非常相符	b.与我有一点相符	c.与我中等强度相符	a.一点也不相符	d.与我非常相符	c.与我中等强度相符	是	是	否	否	是	是	否	是	是	否	是	是	否	否	是	不确定	不确定	不符合	不确定	不确定	符合	符合
105	2024/7/1 19:44:18	109秒	手机提交	直接访问	107	女	21-23	本科在读	A.轻微运动（如散步、做广播体操、打门球等）	B.11至20分钟	A.一个月1次以下	A.散步、跑步┋E.跳绳	a.一点也不相符	b.与我有一点相符	b.与我有一点相符	a.一点也不相符	b.与我有一点相符	b.与我有一点相符	b.与我有一点相符	d.与我非常相符	d.与我非常相符	a.一点也不相符	d.与我非常相符	b.与我有一点相符	d.与我非常相符	d.与我非常相符	d.与我非常相符	是	是	否	否	是	是	是	是	是	是	是	是	是	是	是	符合	符合	符合	极符合	极符合	极符合	极符合
106	2024/7/1 22:07:09	469秒	微信	N/A	108	男	21-23	本科在读	E.呼吸急促，出汗很多的大强度的持久的运动（如赛跑、成套健美操练习、游泳等）	B.11至20分钟	C.一个月2至3次	A.散步、跑步┋C.体育舞蹈┋G.健身器活动	c.与我中等强度相符	e.与我极其相符	d.与我非常相符	d.与我非常相符	d.与我非常相符	d.与我非常相符	e.与我极其相符	e.与我极其相符	e.与我极其相符	d.与我非常相符	b.与我有一点相符	e.与我极其相符	b.与我有一点相符	d.与我非常相符	e.与我极其相符	是	是	是	否	是	否	是	是	是	是	是	是	否	是	是	符合	不符合	符合	不符合	极符合	不确定	极符合
107	2024/7/1 22:07:17	466秒	微信	N/A	114	女	18-20	本科在读	D.呼吸急促、出汗很多的大强度的，但不持久的运动（如打羽毛球、篮球、网球、足球等）	C.21至30分钟	C.一个月2至3次	D.球类┋F.太极拳、养生术	d.与我非常相符	e.与我极其相符	d.与我非常相符	d.与我非常相符	e.与我极其相符	e.与我极其相符	d.与我非常相符	d.与我非常相符	d.与我非常相符	d.与我非常相符	c.与我中等强度相符	e.与我极其相符	b.与我有一点相符	d.与我非常相符	d.与我非常相符	是	是	是	是	是	是	是	是	是	是	是	否	否	是	是	符合	符合	不确定	极符合	不确定	极符合	符合
108	2024/7/1 22:07:28	460秒	微信	N/A	108	男	21-23	本科在读	C.中等强度较激烈持久的运动（如骑自行车跑步打乒乓球等）	B.11至20分钟	C.一个月2至3次	D.球类┋E.跳绳┋F.太极拳、养生术	d.与我非常相符	d.与我非常相符	d.与我非常相符	e.与我极其相符	d.与我非常相符	e.与我极其相符	e.与我极其相符	c.与我中等强度相符	c.与我中等强度相符	b.与我有一点相符	a.一点也不相符	d.与我非常相符	c.与我中等强度相符	d.与我非常相符	d.与我非常相符	是	是	是	是	是	是	否	是	否	是	否	是	是	是	否	符合	不符合	符合	符合	符合	符合	极符合
109	2024/7/1 22:07:38	448秒	微信	N/A	104	女	21-23	本科在读	B.小强度的不太紧张的运动（如消遣娱乐性的打排球、乒乓球、慢跑、打太极拳等）	B.11至20分钟	C.一个月2至3次	A.散步、跑步┋B.旅游、郊游	d.与我非常相符	c.与我中等强度相符	e.与我极其相符	c.与我中等强度相符	e.与我极其相符	e.与我极其相符	d.与我非常相符	d.与我非常相符	e.与我极其相符	d.与我非常相符	c.与我中等强度相符	d.与我非常相符	c.与我中等强度相符	d.与我非常相符	b.与我有一点相符	是	是	是	是	是	是	否	是	是	否	否	是	是	否	否	符合	极符合	符合	极符合	极符合	极符合	不确定
110	2024/7/1 22:07:44	426秒	微信	N/A	106	男	24-26	硕士在读	C.中等强度较激烈持久的运动（如骑自行车跑步打乒乓球等）	A.10分钟以下	D.大约每天1次	D.球类┋G.健身器活动	d.与我非常相符	e.与我极其相符	e.与我极其相符	e.与我极其相符	d.与我非常相符	d.与我非常相符	d.与我非常相符	b.与我有一点相符	e.与我极其相符	d.与我非常相符	d.与我非常相符	e.与我极其相符	b.与我有一点相符	d.与我非常相符	d.与我非常相符	否	否	是	否	是	否	否	是	否	是	否	否	是	是	否	极符合	极符合	符合	符合	符合	极符合	符合
111	2024/7/1 22:07:48	388秒	微信	N/A	119	女	18-20	专科在读	B.小强度的不太紧张的运动（如消遣娱乐性的打排球、乒乓球、慢跑、打太极拳等）	C.21至30分钟	D.大约每天1次	C.体育舞蹈┋D.球类┋E.跳绳	d.与我非常相符	e.与我极其相符	c.与我中等强度相符	e.与我极其相符	d.与我非常相符	d.与我非常相符	e.与我极其相符	e.与我极其相符	e.与我极其相符	d.与我非常相符	d.与我非常相符	c.与我中等强度相符	b.与我有一点相符	d.与我非常相符	e.与我极其相符	是	是	否	是	是	是	否	是	是	是	是	是	否	是	是	不确定	不确定	极符合	符合	极符合	极符合	极符合
112	2024/7/1 22:07:51	485秒	微信	N/A	110	男	24-26	硕士在读	D.呼吸急促、出汗很多的大强度的，但不持久的运动（如打羽毛球、篮球、网球、足球等）	B.11至20分钟	A.一个月1次以下	A.散步、跑步┋G.健身器活动	e.与我极其相符	c.与我中等强度相符	d.与我非常相符	d.与我非常相符	e.与我极其相符	e.与我极其相符	e.与我极其相符	b.与我有一点相符	e.与我极其相符	c.与我中等强度相符	d.与我非常相符	d.与我非常相符	e.与我极其相符	e.与我极其相符	e.与我极其相符	是	否	否	否	是	是	否	是	是	是	是	是	否	否	否	极符合	极符合	符合	极符合	极符合	符合	不确定
113	2024/7/1 22:08:03	499秒	微信	N/A	110	女	24-26	硕士在读	B.小强度的不太紧张的运动（如消遣娱乐性的打排球、乒乓球、慢跑、打太极拳等）	C.21至30分钟	B.每周3至5次	A.散步、跑步┋D.球类┋F.太极拳、养生术	d.与我非常相符	e.与我极其相符	d.与我非常相符	e.与我极其相符	d.与我非常相符	e.与我极其相符	c.与我中等强度相符	b.与我有一点相符	c.与我中等强度相符	a.一点也不相符	d.与我非常相符	b.与我有一点相符	c.与我中等强度相符	e.与我极其相符	e.与我极其相符	否	是	是	是	是	是	是	是	是	是	是	是	是	是	是	符合	符合	极符合	不确定	不确定	符合	不确定
114	2024/7/1 22:08:07	472秒	微信	N/A	114	女	18-20	本科在读	A.轻微运动（如散步、做广播体操、打门球等）	C.21至30分钟	C.一个月2至3次	C.体育舞蹈┋E.跳绳┋F.太极拳、养生术	d.与我非常相符	e.与我极其相符	d.与我非常相符	d.与我非常相符	e.与我极其相符	e.与我极其相符	d.与我非常相符	e.与我极其相符	e.与我极其相符	b.与我有一点相符	a.一点也不相符	e.与我极其相符	b.与我有一点相符	d.与我非常相符	e.与我极其相符	是	是	是	是	否	否	是	是	否	是	否	是	是	是	是	极符合	符合	符合	符合	不确定	极符合	符合
115	2024/7/1 22:08:11	546秒	微信	N/A	105	男	24-26	硕士在读	A.轻微运动（如散步、做广播体操、打门球等）	A.10分钟以下	A.一个月1次以下	C.体育舞蹈┋G.健身器活动	c.与我中等强度相符	e.与我极其相符	e.与我极其相符	b.与我有一点相符	d.与我非常相符	c.与我中等强度相符	e.与我极其相符	e.与我极其相符	e.与我极其相符	d.与我非常相符	d.与我非常相符	d.与我非常相符	b.与我有一点相符	c.与我中等强度相符	d.与我非常相符	是	是	是	是	是	是	是	是	是	否	是	是	否	是	是	极符合	符合	不符合	符合	极符合	符合	符合
116	2024/7/1 22:08:20	457秒	微信	N/A	120	女	24-26	硕士在读	D.呼吸急促、出汗很多的大强度的，但不持久的运动（如打羽毛球、篮球、网球、足球等）	B.11至20分钟	C.一个月2至3次	A.散步、跑步┋B.旅游、郊游┋E.跳绳	d.与我非常相符	e.与我极其相符	d.与我非常相符	e.与我极其相符	c.与我中等强度相符	d.与我非常相符	d.与我非常相符	d.与我非常相符	e.与我极其相符	a.一点也不相符	b.与我有一点相符	c.与我中等强度相符	c.与我中等强度相符	d.与我非常相符	d.与我非常相符	否	是	是	是	是	是	是	是	否	是	是	是	是	是	是	极符合	极符合	极符合	符合	符合	极符合	极符合
117	2024/7/1 22:08:28	454秒	微信	N/A	116	女	24-26	硕士在读	C.中等强度较激烈持久的运动（如骑自行车跑步打乒乓球等）	D.31至59分钟	C.一个月2至3次	A.散步、跑步┋C.体育舞蹈┋D.球类	c.与我中等强度相符	e.与我极其相符	d.与我非常相符	d.与我非常相符	e.与我极其相符	d.与我非常相符	d.与我非常相符	d.与我非常相符	d.与我非常相符	c.与我中等强度相符	c.与我中等强度相符	e.与我极其相符	c.与我中等强度相符	d.与我非常相符	d.与我非常相符	是	否	否	是	是	是	否	是	是	是	是	是	否	是	是	符合	极符合	符合	符合	极符合	符合	不确定
118	2024/7/1 22:08:38	552秒	微信	N/A	117	女	18-20	本科在读	C.中等强度较激烈持久的运动（如骑自行车跑步打乒乓球等）	E.60分钟以上	D.大约每天1次	A.散步、跑步┋E.跳绳	d.与我非常相符	e.与我极其相符	e.与我极其相符	b.与我有一点相符	c.与我中等强度相符	b.与我有一点相符	d.与我非常相符	d.与我非常相符	e.与我极其相符	c.与我中等强度相符	d.与我非常相符	e.与我极其相符	b.与我有一点相符	d.与我非常相符	d.与我非常相符	否	是	是	否	是	是	否	是	否	否	是	是	是	是	是	符合	极符合	极符合	符合	符合	极符合	极符合
119	2024/7/1 22:08:48	426秒	微信	N/A	117	女	24-26	硕士在读	D.呼吸急促、出汗很多的大强度的，但不持久的运动（如打羽毛球、篮球、网球、足球等）	B.11至20分钟	D.大约每天1次	A.散步、跑步┋C.体育舞蹈┋D.球类	c.与我中等强度相符	e.与我极其相符	d.与我非常相符	e.与我极其相符	c.与我中等强度相符	e.与我极其相符	d.与我非常相符	e.与我极其相符	e.与我极其相符	c.与我中等强度相符	e.与我极其相符	d.与我非常相符	a.一点也不相符	e.与我极其相符	e.与我极其相符	否	是	是	是	否	是	是	是	否	否	是	是	是	否	是	极符合	极符合	极符合	符合	符合	极符合	符合
120	2024/7/1 22:08:52	510秒	微信	N/A	108	女	18-20	本科在读	C.中等强度较激烈持久的运动（如骑自行车跑步打乒乓球等）	B.11至20分钟	D.大约每天1次	A.散步、跑步┋C.体育舞蹈┋D.球类	d.与我非常相符	d.与我非常相符	e.与我极其相符	b.与我有一点相符	d.与我非常相符	c.与我中等强度相符	e.与我极其相符	e.与我极其相符	b.与我有一点相符	d.与我非常相符	c.与我中等强度相符	a.一点也不相符	e.与我极其相符	d.与我非常相符	d.与我非常相符	是	是	是	否	否	否	否	否	否	是	是	是	否	是	否	极符合	极符合	极符合	符合	极符合	符合	符合
121	2024/7/1 22:08:57	415秒	微信	N/A	111	男	24-26	硕士在读	C.中等强度较激烈持久的运动（如骑自行车跑步打乒乓球等）	D.31至59分钟	C.一个月2至3次	A.散步、跑步┋B.旅游、郊游┋E.跳绳	d.与我非常相符	e.与我极其相符	d.与我非常相符	e.与我极其相符	b.与我有一点相符	e.与我极其相符	e.与我极其相符	e.与我极其相符	c.与我中等强度相符	b.与我有一点相符	e.与我极其相符	b.与我有一点相符	b.与我有一点相符	d.与我非常相符	b.与我有一点相符	是	否	是	否	是	是	否	否	是	是	是	是	否	是	是	符合	符合	符合	极符合	符合	不确定	符合
122	2024/7/1 22:09:00	389秒	微信	N/A	114	女	21-23	本科在读	C.中等强度较激烈持久的运动（如骑自行车跑步打乒乓球等）	C.21至30分钟	D.大约每天1次	A.散步、跑步┋G.健身器活动	d.与我非常相符	b.与我有一点相符	e.与我极其相符	e.与我极其相符	d.与我非常相符	d.与我非常相符	c.与我中等强度相符	b.与我有一点相符	e.与我极其相符	a.一点也不相符	c.与我中等强度相符	e.与我极其相符	d.与我非常相符	d.与我非常相符	e.与我极其相符	是	否	是	是	是	是	是	是	是	是	是	是	否	是	是	符合	符合	极符合	符合	极符合	极符合	符合
123	2024/7/1 22:09:07	504秒	微信	N/A	107	女	21-23	本科在读	B.小强度的不太紧张的运动（如消遣娱乐性的打排球、乒乓球、慢跑、打太极拳等）	C.21至30分钟	A.一个月1次以下	A.散步、跑步┋D.球类┋G.健身器活动	b.与我有一点相符	d.与我非常相符	b.与我有一点相符	b.与我有一点相符	d.与我非常相符	c.与我中等强度相符	d.与我非常相符	e.与我极其相符	e.与我极其相符	a.一点也不相符	e.与我极其相符	d.与我非常相符	b.与我有一点相符	d.与我非常相符	d.与我非常相符	是	否	是	是	是	否	否	否	是	否	否	是	是	是	否	极符合	极符合	极符合	符合	符合	极符合	不确定
124	2024/7/1 22:09:21	470秒	微信	N/A	112	男	24-26	硕士在读	A.轻微运动（如散步、做广播体操、打门球等）	C.21至30分钟	C.一个月2至3次	A.散步、跑步┋C.体育舞蹈┋F.太极拳、养生术	c.与我中等强度相符	c.与我中等强度相符	e.与我极其相符	d.与我非常相符	d.与我非常相符	c.与我中等强度相符	d.与我非常相符	e.与我极其相符	e.与我极其相符	c.与我中等强度相符	b.与我有一点相符	e.与我极其相符	b.与我有一点相符	d.与我非常相符	c.与我中等强度相符	是	是	是	否	是	是	是	是	是	是	否	是	是	是	是	符合	极符合	符合	符合	极符合	符合	符合
125	2024/7/1 22:09:29	475秒	微信	N/A	107	女	18-20	本科在读	D.呼吸急促、出汗很多的大强度的，但不持久的运动（如打羽毛球、篮球、网球、足球等）	B.11至20分钟	D.大约每天1次	A.散步、跑步┋F.太极拳、养生术	d.与我非常相符	d.与我非常相符	d.与我非常相符	d.与我非常相符	e.与我极其相符	e.与我极其相符	e.与我极其相符	e.与我极其相符	c.与我中等强度相符	b.与我有一点相符	c.与我中等强度相符	b.与我有一点相符	b.与我有一点相符	b.与我有一点相符	b.与我有一点相符	否	是	是	是	是	是	是	否	是	是	是	是	否	否	是	不符合	符合	不符合	符合	符合	极符合	符合
126	2024/7/1 22:09:30	404秒	微信	N/A	103	男	24-26	硕士在读	D.呼吸急促、出汗很多的大强度的，但不持久的运动（如打羽毛球、篮球、网球、足球等）	C.21至30分钟	B.每周3至5次	A.散步、跑步┋E.跳绳	d.与我非常相符	e.与我极其相符	d.与我非常相符	d.与我非常相符	d.与我非常相符	c.与我中等强度相符	d.与我非常相符	d.与我非常相符	d.与我非常相符	c.与我中等强度相符	b.与我有一点相符	e.与我极其相符	d.与我非常相符	e.与我极其相符	d.与我非常相符	否	是	否	是	否	是	是	是	是	否	否	是	否	是	是	不符合	不确定	不确定	不符合	不符合	极符合	符合
127	2024/7/1 22:09:39	502秒	微信	N/A	106	女	18-20	本科在读	C.中等强度较激烈持久的运动（如骑自行车跑步打乒乓球等）	C.21至30分钟	A.一个月1次以下	A.散步、跑步┋F.太极拳、养生术┋G.健身器活动	d.与我非常相符	c.与我中等强度相符	e.与我极其相符	e.与我极其相符	d.与我非常相符	d.与我非常相符	d.与我非常相符	e.与我极其相符	b.与我有一点相符	e.与我极其相符	d.与我非常相符	c.与我中等强度相符	c.与我中等强度相符	c.与我中等强度相符	c.与我中等强度相符	是	是	是	是	否	否	是	是	是	否	否	是	否	是	否	符合	极符合	极符合	符合	极符合	符合	极符合
128	2024/7/1 22:10:02	412秒	微信	N/A	104	男	21-23	本科在读	A.轻微运动（如散步、做广播体操、打门球等）	D.31至59分钟	D.大约每天1次	A.散步、跑步┋E.跳绳	c.与我中等强度相符	c.与我中等强度相符	e.与我极其相符	e.与我极其相符	d.与我非常相符	e.与我极其相符	d.与我非常相符	b.与我有一点相符	e.与我极其相符	d.与我非常相符	a.一点也不相符	d.与我非常相符	b.与我有一点相符	c.与我中等强度相符	d.与我非常相符	是	是	是	是	是	否	是	是	是	是	是	是	是	是	是	符合	极符合	符合	极符合	符合	符合	符合
129	2024/7/1 22:10:20	543秒	微信	N/A	113	女	18-20	本科在读	D.呼吸急促、出汗很多的大强度的，但不持久的运动（如打羽毛球、篮球、网球、足球等）	C.21至30分钟	D.大约每天1次	A.散步、跑步┋C.体育舞蹈┋G.健身器活动	e.与我极其相符	d.与我非常相符	e.与我极其相符	d.与我非常相符	d.与我非常相符	d.与我非常相符	d.与我非常相符	d.与我非常相符	e.与我极其相符	d.与我非常相符	c.与我中等强度相符	e.与我极其相符	d.与我非常相符	b.与我有一点相符	c.与我中等强度相符	是	是	是	否	是	是	是	是	否	是	是	是	是	是	否	极符合	不符合	不确定	极符合	符合	符合	极符合
130	2024/7/1 22:10:44	424秒	微信	N/A	107	男	18-20	本科在读	C.中等强度较激烈持久的运动（如骑自行车跑步打乒乓球等）	D.31至59分钟	D.大约每天1次	B.旅游、郊游┋C.体育舞蹈┋G.健身器活动	b.与我有一点相符	d.与我非常相符	d.与我非常相符	d.与我非常相符	d.与我非常相符	e.与我极其相符	d.与我非常相符	d.与我非常相符	e.与我极其相符	b.与我有一点相符	b.与我有一点相符	a.一点也不相符	b.与我有一点相符	e.与我极其相符	e.与我极其相符	是	否	是	否	否	是	是	是	否	否	是	是	否	否	是	符合	极符合	不确定	符合	极符合	符合	极符合
131	2024/7/1 22:11:02	516秒	微信	N/A	110	男	18-20	本科在读	C.中等强度较激烈持久的运动（如骑自行车跑步打乒乓球等）	D.31至59分钟	B.每周3至5次	E.跳绳┋G.健身器活动	d.与我非常相符	e.与我极其相符	d.与我非常相符	e.与我极其相符	d.与我非常相符	e.与我极其相符	d.与我非常相符	e.与我极其相符	c.与我中等强度相符	c.与我中等强度相符	d.与我非常相符	c.与我中等强度相符	a.一点也不相符	d.与我非常相符	d.与我非常相符	是	是	是	是	是	是	否	是	是	是	否	否	是	是	是	符合	不确定	极符合	符合	不确定	符合	不符合
132	2024/7/1 22:11:13	478秒	微信	N/A	116	男	18-20	专科在读	C.中等强度较激烈持久的运动（如骑自行车跑步打乒乓球等）	D.31至59分钟	C.一个月2至3次	A.散步、跑步┋G.健身器活动┋H.游泳	d.与我非常相符	e.与我极其相符	b.与我有一点相符	d.与我非常相符	d.与我非常相符	e.与我极其相符	d.与我非常相符	e.与我极其相符	e.与我极其相符	c.与我中等强度相符	d.与我非常相符	d.与我非常相符	b.与我有一点相符	d.与我非常相符	e.与我极其相符	是	是	是	是	否	是	是	是	是	是	否	是	是	是	否	极符合	极符合	符合	不确定	极符合	符合	符合
133	2024/7/1 22:11:20	458秒	微信	N/A	114	男	18-20	专科在读	D.呼吸急促、出汗很多的大强度的，但不持久的运动（如打羽毛球、篮球、网球、足球等）	D.31至59分钟	A.一个月1次以下	A.散步、跑步┋E.跳绳┋G.健身器活动	e.与我极其相符	e.与我极其相符	d.与我非常相符	e.与我极其相符	d.与我非常相符	e.与我极其相符	e.与我极其相符	e.与我极其相符	e.与我极其相符	a.一点也不相符	d.与我非常相符	d.与我非常相符	d.与我非常相符	d.与我非常相符	d.与我非常相符	是	否	是	是	否	是	是	否	是	是	是	是	否	否	是	符合	不确定	不符合	符合	极符合	极符合	不确定
134	2024/7/1 22:11:30	488秒	微信	N/A	104	女	18-20	本科在读	A.轻微运动（如散步、做广播体操、打门球等）	B.11至20分钟	E.每周1到2次	D.球类┋G.健身器活动	b.与我有一点相符	d.与我非常相符	d.与我非常相符	d.与我非常相符	d.与我非常相符	e.与我极其相符	d.与我非常相符	e.与我极其相符	b.与我有一点相符	d.与我非常相符	a.一点也不相符	b.与我有一点相符	b.与我有一点相符	e.与我极其相符	d.与我非常相符	是	是	否	否	是	是	否	是	否	是	是	是	否	是	是	极符合	极符合	符合	符合	极符合	极符合	符合
135	2024/7/1 22:11:41	407秒	微信	N/A	107	女	18-20	专科在读	A.轻微运动（如散步、做广播体操、打门球等）	D.31至59分钟	C.一个月2至3次	B.旅游、郊游┋C.体育舞蹈┋G.健身器活动	e.与我极其相符	e.与我极其相符	e.与我极其相符	d.与我非常相符	e.与我极其相符	c.与我中等强度相符	b.与我有一点相符	d.与我非常相符	e.与我极其相符	b.与我有一点相符	b.与我有一点相符	a.一点也不相符	c.与我中等强度相符	e.与我极其相符	e.与我极其相符	否	是	是	是	是	是	否	否	否	是	否	是	是	是	是	极符合	不确定	极符合	符合	不符合	极符合	符合
136	2024/7/1 22:11:53	527秒	微信	N/A	112	男	18-20	本科在读	D.呼吸急促、出汗很多的大强度的，但不持久的运动（如打羽毛球、篮球、网球、足球等）	B.11至20分钟	B.每周3至5次	C.体育舞蹈┋G.健身器活动	e.与我极其相符	c.与我中等强度相符	d.与我非常相符	d.与我非常相符	d.与我非常相符	d.与我非常相符	d.与我非常相符	d.与我非常相符	d.与我非常相符	d.与我非常相符	e.与我极其相符	e.与我极其相符	d.与我非常相符	e.与我极其相符	d.与我非常相符	是	是	是	否	是	是	否	是	是	否	是	否	否	是	是	不确定	符合	符合	极符合	极符合	不符合	极符合
137	2024/7/1 22:12:02	406秒	微信	N/A	114	男	18-20	专科在读	D.呼吸急促、出汗很多的大强度的，但不持久的运动（如打羽毛球、篮球、网球、足球等）	B.11至20分钟	D.大约每天1次	C.体育舞蹈┋E.跳绳	d.与我非常相符	e.与我极其相符	d.与我非常相符	d.与我非常相符	d.与我非常相符	d.与我非常相符	d.与我非常相符	e.与我极其相符	d.与我非常相符	c.与我中等强度相符	c.与我中等强度相符	c.与我中等强度相符	d.与我非常相符	e.与我极其相符	c.与我中等强度相符	否	是	是	是	是	是	是	是	是	是	否	是	否	是	是	符合	符合	符合	不确定	不符合	符合	符合
138	2024/7/1 22:12:09	468秒	微信	N/A	111	女	27-29	博士在读	B.小强度的不太紧张的运动（如消遣娱乐性的打排球、乒乓球、慢跑、打太极拳等）	D.31至59分钟	D.大约每天1次	C.体育舞蹈┋E.跳绳┋F.太极拳、养生术	e.与我极其相符	d.与我非常相符	d.与我非常相符	e.与我极其相符	d.与我非常相符	e.与我极其相符	d.与我非常相符	e.与我极其相符	d.与我非常相符	d.与我非常相符	b.与我有一点相符	d.与我非常相符	c.与我中等强度相符	d.与我非常相符	d.与我非常相符	是	是	是	是	否	是	是	是	否	是	是	是	是	是	是	符合	极符合	符合	符合	不符合	极符合	不确定
139	2024/7/1 22:12:14	493秒	微信	N/A	116	女	18-20	专科在读	B.小强度的不太紧张的运动（如消遣娱乐性的打排球、乒乓球、慢跑、打太极拳等）	D.31至59分钟	D.大约每天1次	B.旅游、郊游┋F.太极拳、养生术┋H.游泳	d.与我非常相符	e.与我极其相符	e.与我极其相符	b.与我有一点相符	e.与我极其相符	d.与我非常相符	d.与我非常相符	e.与我极其相符	e.与我极其相符	c.与我中等强度相符	d.与我非常相符	e.与我极其相符	d.与我非常相符	c.与我中等强度相符	e.与我极其相符	是	是	是	是	是	是	是	是	是	是	是	是	是	否	否	极符合	不确定	符合	极符合	极符合	符合	符合
140	2024/7/1 22:12:21	430秒	微信	N/A	120	女	27-29	博士在读	C.中等强度较激烈持久的运动（如骑自行车跑步打乒乓球等）	B.11至20分钟	E.每周1到2次	A.散步、跑步┋C.体育舞蹈	d.与我非常相符	e.与我极其相符	d.与我非常相符	e.与我极其相符	e.与我极其相符	e.与我极其相符	d.与我非常相符	e.与我极其相符	d.与我非常相符	b.与我有一点相符	e.与我极其相符	e.与我极其相符	c.与我中等强度相符	d.与我非常相符	d.与我非常相符	是	是	是	否	是	是	否	否	是	是	是	否	否	是	否	极符合	极符合	符合	符合	极符合	极符合	符合
141	2024/7/1 22:12:27	402秒	微信	N/A	112	男	27-29	博士在读	A.轻微运动（如散步、做广播体操、打门球等）	B.11至20分钟	E.每周1到2次	A.散步、跑步┋B.旅游、郊游┋F.太极拳、养生术	c.与我中等强度相符	e.与我极其相符	d.与我非常相符	c.与我中等强度相符	d.与我非常相符	e.与我极其相符	c.与我中等强度相符	e.与我极其相符	e.与我极其相符	b.与我有一点相符	d.与我非常相符	e.与我极其相符	b.与我有一点相符	d.与我非常相符	d.与我非常相符	否	是	是	是	是	是	否	是	否	否	是	是	否	是	是	符合	符合	极符合	极符合	符合	符合	极符合
142	2024/7/1 22:12:29	468秒	微信	N/A	106	男	18-20	本科在读	B.小强度的不太紧张的运动（如消遣娱乐性的打排球、乒乓球、慢跑、打太极拳等）	B.11至20分钟	C.一个月2至3次	A.散步、跑步┋E.跳绳┋G.健身器活动	d.与我非常相符	d.与我非常相符	e.与我极其相符	d.与我非常相符	e.与我极其相符	e.与我极其相符	d.与我非常相符	e.与我极其相符	c.与我中等强度相符	c.与我中等强度相符	b.与我有一点相符	a.一点也不相符	b.与我有一点相符	e.与我极其相符	d.与我非常相符	否	否	是	是	是	是	否	是	是	是	是	是	否	是	是	极符合	极符合	符合	极符合	符合	符合	符合
143	2024/7/1 22:12:40	492秒	微信	N/A	109	女	21-23	专科在读	C.中等强度较激烈持久的运动（如骑自行车跑步打乒乓球等）	A.10分钟以下	D.大约每天1次	E.跳绳┋G.健身器活动	d.与我非常相符	e.与我极其相符	e.与我极其相符	e.与我极其相符	d.与我非常相符	d.与我非常相符	e.与我极其相符	c.与我中等强度相符	e.与我极其相符	c.与我中等强度相符	c.与我中等强度相符	b.与我有一点相符	b.与我有一点相符	b.与我有一点相符	d.与我非常相符	是	是	是	是	否	是	是	是	是	是	否	是	否	否	否	符合	极符合	符合	极符合	符合	符合	符合
144	2024/7/1 22:12:43	515秒	微信	N/A	117	女	27-29	博士在读	B.小强度的不太紧张的运动（如消遣娱乐性的打排球、乒乓球、慢跑、打太极拳等）	C.21至30分钟	E.每周1到2次	B.旅游、郊游┋E.跳绳┋G.健身器活动	d.与我非常相符	b.与我有一点相符	d.与我非常相符	c.与我中等强度相符	d.与我非常相符	b.与我有一点相符	d.与我非常相符	d.与我非常相符	e.与我极其相符	b.与我有一点相符	a.一点也不相符	e.与我极其相符	d.与我非常相符	e.与我极其相符	c.与我中等强度相符	是	是	是	是	否	是	否	是	是	是	否	是	是	是	是	符合	符合	极符合	符合	极符合	极符合	符合
145	2024/7/1 22:12:48	505秒	微信	N/A	109	男	27-29	博士在读	A.轻微运动（如散步、做广播体操、打门球等）	C.21至30分钟	D.大约每天1次	C.体育舞蹈┋G.健身器活动	d.与我非常相符	d.与我非常相符	c.与我中等强度相符	d.与我非常相符	d.与我非常相符	e.与我极其相符	d.与我非常相符	d.与我非常相符	e.与我极其相符	d.与我非常相符	d.与我非常相符	e.与我极其相符	b.与我有一点相符	c.与我中等强度相符	d.与我非常相符	是	是	是	是	否	否	是	是	是	是	是	是	否	否	否	符合	极符合	不符合	极符合	符合	极符合	符合
146	2024/7/1 22:12:56	380秒	微信	N/A	108	女	18-20	本科在读	B.小强度的不太紧张的运动（如消遣娱乐性的打排球、乒乓球、慢跑、打太极拳等）	B.11至20分钟	C.一个月2至3次	A.散步、跑步┋E.跳绳	b.与我有一点相符	c.与我中等强度相符	e.与我极其相符	e.与我极其相符	e.与我极其相符	c.与我中等强度相符	e.与我极其相符	e.与我极其相符	e.与我极其相符	e.与我极其相符	d.与我非常相符	e.与我极其相符	d.与我非常相符	d.与我非常相符	e.与我极其相符	是	是	否	是	否	是	是	是	否	是	否	是	否	是	是	极符合	极符合	符合	极符合	不符合	极符合	不确定
147	2024/7/1 22:13:07	407秒	微信	N/A	108	女	18-20	本科在读	D.呼吸急促、出汗很多的大强度的，但不持久的运动（如打羽毛球、篮球、网球、足球等）	D.31至59分钟	D.大约每天1次	C.体育舞蹈┋D.球类	c.与我中等强度相符	d.与我非常相符	d.与我非常相符	e.与我极其相符	c.与我中等强度相符	d.与我非常相符	d.与我非常相符	d.与我非常相符	e.与我极其相符	b.与我有一点相符	a.一点也不相符	e.与我极其相符	a.一点也不相符	d.与我非常相符	d.与我非常相符	是	是	是	否	是	否	是	否	是	否	是	否	否	是	是	极符合	不符合	极符合	符合	不符合	符合	符合
148	2024/7/1 22:13:16	476秒	微信	N/A	107	男	21-23	本科在读	B.小强度的不太紧张的运动（如消遣娱乐性的打排球、乒乓球、慢跑、打太极拳等）	B.11至20分钟	B.每周3至5次	A.散步、跑步┋E.跳绳	d.与我非常相符	d.与我非常相符	d.与我非常相符	e.与我极其相符	b.与我有一点相符	e.与我极其相符	d.与我非常相符	d.与我非常相符	e.与我极其相符	a.一点也不相符	c.与我中等强度相符	a.一点也不相符	c.与我中等强度相符	c.与我中等强度相符	d.与我非常相符	是	是	是	否	是	是	是	是	是	是	是	是	是	是	是	极符合	极符合	不确定	极符合	不确定	符合	不确定
149	2024/7/1 22:13:42	457秒	微信	N/A	112	男	18-20	本科在读	C.中等强度较激烈持久的运动（如骑自行车跑步打乒乓球等）	D.31至59分钟	B.每周3至5次	A.散步、跑步┋E.跳绳	e.与我极其相符	d.与我非常相符	d.与我非常相符	b.与我有一点相符	e.与我极其相符	e.与我极其相符	d.与我非常相符	d.与我非常相符	d.与我非常相符	b.与我有一点相符	a.一点也不相符	d.与我非常相符	c.与我中等强度相符	d.与我非常相符	c.与我中等强度相符	是	否	是	是	否	是	是	是	否	是	是	是	是	是	是	极符合	符合	极符合	不确定	极符合	符合	符合
150	2024/7/1 22:13:52	401秒	微信	N/A	107	女	18-20	本科在读	D.呼吸急促、出汗很多的大强度的，但不持久的运动（如打羽毛球、篮球、网球、足球等）	C.21至30分钟	B.每周3至5次	C.体育舞蹈┋F.太极拳、养生术	c.与我中等强度相符	e.与我极其相符	e.与我极其相符	d.与我非常相符	d.与我非常相符	e.与我极其相符	e.与我极其相符	e.与我极其相符	b.与我有一点相符	b.与我有一点相符	c.与我中等强度相符	d.与我非常相符	c.与我中等强度相符	c.与我中等强度相符	d.与我非常相符	是	否	是	是	否	否	是	否	是	否	是	是	否	是	是	符合	符合	符合	符合	不符合	符合	极符合
151	2024/7/1 22:14:04	497秒	微信	N/A	109	女	18-20	本科在读	D.呼吸急促、出汗很多的大强度的，但不持久的运动（如打羽毛球、篮球、网球、足球等）	A.10分钟以下	A.一个月1次以下	A.散步、跑步┋G.健身器活动	d.与我非常相符	e.与我极其相符	b.与我有一点相符	e.与我极其相符	d.与我非常相符	e.与我极其相符	c.与我中等强度相符	e.与我极其相符	b.与我有一点相符	e.与我极其相符	e.与我极其相符	d.与我非常相符	a.一点也不相符	c.与我中等强度相符	e.与我极其相符	是	是	否	是	是	是	否	是	是	是	否	是	否	是	是	极符合	极符合	符合	符合	极符合	符合	不确定
152	2024/7/1 22:14:14	421秒	微信	N/A	109	男	18-20	本科在读	C.中等强度较激烈持久的运动（如骑自行车跑步打乒乓球等）	E.60分钟以上	C.一个月2至3次	E.跳绳┋F.太极拳、养生术	d.与我非常相符	e.与我极其相符	e.与我极其相符	d.与我非常相符	d.与我非常相符	d.与我非常相符	e.与我极其相符	e.与我极其相符	d.与我非常相符	e.与我极其相符	a.一点也不相符	e.与我极其相符	c.与我中等强度相符	d.与我非常相符	d.与我非常相符	否	是	是	否	是	否	否	是	否	是	是	是	否	是	是	不确定	极符合	极符合	符合	极符合	符合	符合
153	2024/7/1 22:14:26	409秒	微信	N/A	104	男	21-23	本科在读	C.中等强度较激烈持久的运动（如骑自行车跑步打乒乓球等）	B.11至20分钟	C.一个月2至3次	A.散步、跑步┋B.旅游、郊游	d.与我非常相符	e.与我极其相符	e.与我极其相符	e.与我极其相符	d.与我非常相符	e.与我极其相符	b.与我有一点相符	e.与我极其相符	d.与我非常相符	a.一点也不相符	c.与我中等强度相符	d.与我非常相符	c.与我中等强度相符	d.与我非常相符	e.与我极其相符	否	否	是	否	是	是	是	是	否	否	否	是	否	是	否	符合	符合	符合	极符合	符合	符合	极符合
154	2024/7/1 22:14:34	508秒	微信	N/A	105	男	18-20	本科在读	C.中等强度较激烈持久的运动（如骑自行车跑步打乒乓球等）	C.21至30分钟	A.一个月1次以下	A.散步、跑步┋E.跳绳┋G.健身器活动	e.与我极其相符	c.与我中等强度相符	d.与我非常相符	d.与我非常相符	d.与我非常相符	e.与我极其相符	e.与我极其相符	e.与我极其相符	d.与我非常相符	d.与我非常相符	a.一点也不相符	d.与我非常相符	b.与我有一点相符	d.与我非常相符	d.与我非常相符	是	是	否	是	是	是	是	是	是	是	是	是	是	否	是	符合	极符合	极符合	符合	不确定	不确定	符合
155	2024/7/1 22:14:45	504秒	微信	N/A	118	女	18-20	本科在读	B.小强度的不太紧张的运动（如消遣娱乐性的打排球、乒乓球、慢跑、打太极拳等）	C.21至30分钟	C.一个月2至3次	E.跳绳┋F.太极拳、养生术	e.与我极其相符	c.与我中等强度相符	c.与我中等强度相符	e.与我极其相符	d.与我非常相符	e.与我极其相符	e.与我极其相符	e.与我极其相符	c.与我中等强度相符	b.与我有一点相符	b.与我有一点相符	e.与我极其相符	d.与我非常相符	d.与我非常相符	e.与我极其相符	是	否	否	是	是	是	是	是	是	是	是	是	是	是	是	极符合	极符合	符合	符合	符合	符合	符合
156	2024/7/1 22:14:58	507秒	微信	N/A	111	女	18-20	本科在读	C.中等强度较激烈持久的运动（如骑自行车跑步打乒乓球等）	C.21至30分钟	C.一个月2至3次	A.散步、跑步┋G.健身器活动	b.与我有一点相符	d.与我非常相符	e.与我极其相符	e.与我极其相符	e.与我极其相符	d.与我非常相符	d.与我非常相符	e.与我极其相符	e.与我极其相符	c.与我中等强度相符	d.与我非常相符	e.与我极其相符	b.与我有一点相符	e.与我极其相符	e.与我极其相符	是	否	是	是	是	是	否	是	是	是	是	是	否	否	是	极符合	极符合	不符合	极符合	不符合	极符合	符合
157	2024/7/1 22:15:07	385秒	微信	N/A	103	男	21-23	本科在读	B.小强度的不太紧张的运动（如消遣娱乐性的打排球、乒乓球、慢跑、打太极拳等）	A.10分钟以下	C.一个月2至3次	A.散步、跑步┋G.健身器活动	e.与我极其相符	c.与我中等强度相符	e.与我极其相符	e.与我极其相符	e.与我极其相符	d.与我非常相符	d.与我非常相符	c.与我中等强度相符	c.与我中等强度相符	b.与我有一点相符	c.与我中等强度相符	e.与我极其相符	c.与我中等强度相符	d.与我非常相符	d.与我非常相符	否	否	是	是	是	否	是	是	否	是	否	否	否	是	否	符合	符合	符合	符合	不符合	符合	符合
158	2024/7/1 22:15:17	540秒	微信	N/A	120	女	18-20	本科在读	B.小强度的不太紧张的运动（如消遣娱乐性的打排球、乒乓球、慢跑、打太极拳等）	D.31至59分钟	E.每周1到2次	A.散步、跑步┋C.体育舞蹈┋E.跳绳	d.与我非常相符	e.与我极其相符	d.与我非常相符	e.与我极其相符	d.与我非常相符	e.与我极其相符	d.与我非常相符	c.与我中等强度相符	e.与我极其相符	b.与我有一点相符	d.与我非常相符	e.与我极其相符	d.与我非常相符	d.与我非常相符	d.与我非常相符	否	是	是	否	是	是	是	是	是	是	是	是	否	是	是	极符合	极符合	极符合	极符合	不确定	符合	不确定
159	2024/7/1 22:15:36	486秒	微信	N/A	115	女	18-20	本科在读	C.中等强度较激烈持久的运动（如骑自行车跑步打乒乓球等）	D.31至59分钟	C.一个月2至3次	A.散步、跑步┋E.跳绳┋I.其他	e.与我极其相符	d.与我非常相符	d.与我非常相符	d.与我非常相符	d.与我非常相符	c.与我中等强度相符	e.与我极其相符	e.与我极其相符	d.与我非常相符	c.与我中等强度相符	c.与我中等强度相符	d.与我非常相符	c.与我中等强度相符	c.与我中等强度相符	e.与我极其相符	否	是	是	否	是	是	是	是	是	是	是	否	否	是	是	符合	符合	极符合	不符合	符合	极符合	符合
160	2024/7/1 22:15:48	446秒	微信	N/A	107	女	21-23	本科在读	B.小强度的不太紧张的运动（如消遣娱乐性的打排球、乒乓球、慢跑、打太极拳等）	C.21至30分钟	B.每周3至5次	A.散步、跑步┋G.健身器活动	b.与我有一点相符	d.与我非常相符	e.与我极其相符	d.与我非常相符	c.与我中等强度相符	b.与我有一点相符	d.与我非常相符	d.与我非常相符	d.与我非常相符	e.与我极其相符	b.与我有一点相符	c.与我中等强度相符	b.与我有一点相符	d.与我非常相符	d.与我非常相符	是	是	是	是	是	是	否	是	是	是	是	是	否	否	是	极符合	极符合	极符合	符合	极符合	极符合	符合
161	2024/7/1 23:11:34	114秒	微信	N/A	99	女	18-20	本科在读	A.轻微运动（如散步、做广播体操、打门球等）	E.60分钟以上	B.每周3至5次	A.散步、跑步┋B.旅游、郊游┋E.跳绳	c.与我中等强度相符	b.与我有一点相符	b.与我有一点相符	b.与我有一点相符	b.与我有一点相符	c.与我中等强度相符	c.与我中等强度相符	c.与我中等强度相符	c.与我中等强度相符	d.与我非常相符	b.与我有一点相符	c.与我中等强度相符	c.与我中等强度相符	c.与我中等强度相符	c.与我中等强度相符	是	是	否	是	是	是	是	是	是	是	是	是	是	是	是	符合	符合	不确定	不确定	不确定	符合	符合
162	2024/7/1 23:26:51	235秒	微信	N/A	103	女	24-26	硕士在读	A.轻微运动（如散步、做广播体操、打门球等）	B.11至20分钟	E.每周1到2次	B.旅游、郊游┋C.体育舞蹈	a.一点也不相符	d.与我非常相符	a.一点也不相符	c.与我中等强度相符	a.一点也不相符	c.与我中等强度相符	a.一点也不相符	d.与我非常相符	d.与我非常相符	b.与我有一点相符	d.与我非常相符	c.与我中等强度相符	d.与我非常相符	d.与我非常相符	a.一点也不相符	是	是	否	是	是	是	是	是	是	否	是	是	否	否	否	符合	符合	不确定	不确定	不确定	符合	符合
163	2024/7/2 8:30:53	157秒	手机提交	直接访问	107	女	24-26	硕士在读	B.小强度的不太紧张的运动（如消遣娱乐性的打排球、乒乓球、慢跑、打太极拳等）	B.11至20分钟	E.每周1到2次	A.散步、跑步┋B.旅游、郊游┋E.跳绳	a.一点也不相符	b.与我有一点相符	c.与我中等强度相符	d.与我非常相符	c.与我中等强度相符	b.与我有一点相符	a.一点也不相符	c.与我中等强度相符	e.与我极其相符	c.与我中等强度相符	c.与我中等强度相符	d.与我非常相符	c.与我中等强度相符	e.与我极其相符	b.与我有一点相符	是	是	否	是	是	是	是	是	是	是	是	是	否	否	否	极符合	符合	符合	不确定	符合	极符合	符合
164	2024/7/2 8:49:44	257秒	微信	N/A	114	男	18-20	专科在读	B.小强度的不太紧张的运动（如消遣娱乐性的打排球、乒乓球、慢跑、打太极拳等）	B.11至20分钟	A.一个月1次以下	C.体育舞蹈┋D.球类┋E.跳绳	c.与我中等强度相符	e.与我极其相符	b.与我有一点相符	d.与我非常相符	c.与我中等强度相符	b.与我有一点相符	d.与我非常相符	e.与我极其相符	e.与我极其相符	d.与我非常相符	e.与我极其相符	d.与我非常相符	e.与我极其相符	e.与我极其相符	b.与我有一点相符	是	否	否	是	否	否	否	是	是	是	否	否	是	否	否	极符合	不确定	极符合	符合	符合	符合	符合
165	2024/7/2 8:50:15	405秒	微信	N/A	116	女	21-23	本科在读	B.小强度的不太紧张的运动（如消遣娱乐性的打排球、乒乓球、慢跑、打太极拳等）	B.11至20分钟	C.一个月2至3次	A.散步、跑步┋D.球类	d.与我非常相符	e.与我极其相符	b.与我有一点相符	e.与我极其相符	d.与我非常相符	b.与我有一点相符	d.与我非常相符	c.与我中等强度相符	e.与我极其相符	d.与我非常相符	d.与我非常相符	d.与我非常相符	e.与我极其相符	c.与我中等强度相符	b.与我有一点相符	否	否	是	否	否	是	否	是	否	是	否	否	否	否	是	极符合	极符合	符合	极符合	不确定	符合	极符合
166	2024/7/2 8:50:50	291秒	微信	N/A	65	男	24-26	硕士在读	D.呼吸急促、出汗很多的大强度的，但不持久的运动（如打羽毛球、篮球、网球、足球等）	B.11至20分钟	E.每周1到2次	B.旅游、郊游┋C.体育舞蹈┋D.球类	b.与我有一点相符	b.与我有一点相符	e.与我极其相符	c.与我中等强度相符	b.与我有一点相符	d.与我非常相符	a.一点也不相符	a.一点也不相符	b.与我有一点相符	b.与我有一点相符	a.一点也不相符	a.一点也不相符	b.与我有一点相符	b.与我有一点相符	d.与我非常相符	是	否	否	是	否	是	否	是	是	否	否	是	是	是	否	极不符合	不符合	不符合	不确定	极不符合	不符合	不符合
167	2024/7/2 8:51:16	279秒	微信	N/A	117	女	21-23	本科在读	B.小强度的不太紧张的运动（如消遣娱乐性的打排球、乒乓球、慢跑、打太极拳等）	C.21至30分钟	B.每周3至5次	A.散步、跑步┋B.旅游、郊游	c.与我中等强度相符	e.与我极其相符	a.一点也不相符	d.与我非常相符	c.与我中等强度相符	a.一点也不相符	e.与我极其相符	e.与我极其相符	c.与我中等强度相符	c.与我中等强度相符	e.与我极其相符	d.与我非常相符	d.与我非常相符	d.与我非常相符	a.一点也不相符	否	否	否	是	否	否	是	否	否	否	否	否	是	否	否	极符合	极符合	极符合	符合	极符合	符合	极符合
168	2024/7/2 8:51:58	395秒	微信	N/A	63	男	24-26	硕士在读	A.轻微运动（如散步、做广播体操、打门球等）	C.21至30分钟	B.每周3至5次	A.散步、跑步┋B.旅游、郊游┋F.太极拳、养生术	a.一点也不相符	b.与我有一点相符	d.与我非常相符	c.与我中等强度相符	a.一点也不相符	d.与我非常相符	a.一点也不相符	b.与我有一点相符	c.与我中等强度相符	c.与我中等强度相符	b.与我有一点相符	b.与我有一点相符	a.一点也不相符	a.一点也不相符	d.与我非常相符	是	否	是	否	是	否	是	否	否	是	是	是	是	否	否	极不符合	不确定	不确定	不符合	不符合	不符合	不符合
169	2024/7/2 8:52:47	396秒	微信	N/A	124	女	18-20	专科在读	B.小强度的不太紧张的运动（如消遣娱乐性的打排球、乒乓球、慢跑、打太极拳等）	C.21至30分钟	C.一个月2至3次	C.体育舞蹈┋D.球类	d.与我非常相符	d.与我非常相符	a.一点也不相符	d.与我非常相符	e.与我极其相符	a.一点也不相符	d.与我非常相符	c.与我中等强度相符	e.与我极其相符	d.与我非常相符	e.与我极其相符	d.与我非常相符	d.与我非常相符	d.与我非常相符	a.一点也不相符	否	否	是	是	是	是	是	否	是	否	是	是	是	否	是	符合	符合	极符合	极符合	符合	极符合	不确定
170	2024/7/2 8:53:35	268秒	微信	N/A	124	女	21-23	本科在读	A.轻微运动（如散步、做广播体操、打门球等）	B.11至20分钟	B.每周3至5次	A.散步、跑步┋C.体育舞蹈┋E.跳绳	d.与我非常相符	d.与我非常相符	a.一点也不相符	e.与我极其相符	e.与我极其相符	b.与我有一点相符	c.与我中等强度相符	e.与我极其相符	e.与我极其相符	d.与我非常相符	d.与我非常相符	d.与我非常相符	e.与我极其相符	e.与我极其相符	b.与我有一点相符	否	否	是	否	是	是	否	是	是	否	否	是	是	是	否	极符合	不确定	极符合	极符合	极符合	极符合	极符合
171	2024/7/2 8:54:17	285秒	微信	N/A	58	男	24-26	硕士在读	A.轻微运动（如散步、做广播体操、打门球等）	A.10分钟以下	D.大约每天1次	A.散步、跑步┋B.旅游、郊游┋I.其他	a.一点也不相符	b.与我有一点相符	d.与我非常相符	b.与我有一点相符	b.与我有一点相符	d.与我非常相符	a.一点也不相符	b.与我有一点相符	c.与我中等强度相符	b.与我有一点相符	b.与我有一点相符	a.一点也不相符	b.与我有一点相符	b.与我有一点相符	e.与我极其相符	否	否	否	是	否	是	否	否	是	是	否	是	是	是	是	不符合	不确定	极不符合	极不符合	极不符合	极不符合	极不符合
172	2024/7/2 8:55:06	313秒	微信	N/A	113	男	21-23	本科在读	E.呼吸急促，出汗很多的大强度的持久的运动（如赛跑、成套健美操练习、游泳等）	B.11至20分钟	C.一个月2至3次	A.散步、跑步┋C.体育舞蹈	c.与我中等强度相符	e.与我极其相符	a.一点也不相符	c.与我中等强度相符	d.与我非常相符	c.与我中等强度相符	c.与我中等强度相符	d.与我非常相符	d.与我非常相符	e.与我极其相符	d.与我非常相符	d.与我非常相符	c.与我中等强度相符	c.与我中等强度相符	a.一点也不相符	否	是	是	否	否	是	否	是	否	否	否	否	否	是	否	符合	极符合	极符合	不确定	符合	极符合	极符合
173	2024/7/2 8:55:51	323秒	微信	N/A	121	男	21-23	本科在读	C.中等强度较激烈持久的运动（如骑自行车跑步打乒乓球等）	B.11至20分钟	A.一个月1次以下	A.散步、跑步┋B.旅游、郊游┋F.太极拳、养生术	d.与我非常相符	d.与我非常相符	b.与我有一点相符	e.与我极其相符	e.与我极其相符	a.一点也不相符	e.与我极其相符	d.与我非常相符	c.与我中等强度相符	d.与我非常相符	d.与我非常相符	e.与我极其相符	e.与我极其相符	e.与我极其相符	a.一点也不相符	否	否	是	是	否	是	否	否	否	是	是	否	否	是	是	符合	极符合	符合	符合	符合	极符合	极符合
174	2024/7/2 8:56:24	282秒	微信	N/A	65	女	24-26	硕士在读	C.中等强度较激烈持久的运动（如骑自行车跑步打乒乓球等）	B.11至20分钟	B.每周3至5次	A.散步、跑步┋B.旅游、郊游┋C.体育舞蹈	a.一点也不相符	b.与我有一点相符	e.与我极其相符	c.与我中等强度相符	b.与我有一点相符	d.与我非常相符	b.与我有一点相符	a.一点也不相符	a.一点也不相符	a.一点也不相符	b.与我有一点相符	b.与我有一点相符	a.一点也不相符	a.一点也不相符	d.与我非常相符	是	是	是	是	是	否	否	是	是	是	否	否	是	是	否	不符合	不符合	不符合	不确定	不符合	极不符合	不确定
175	2024/7/2 8:57:08	385秒	微信	N/A	111	男	18-20	本科在读	A.轻微运动（如散步、做广播体操、打门球等）	B.11至20分钟	B.每周3至5次	B.旅游、郊游┋C.体育舞蹈┋E.跳绳	e.与我极其相符	d.与我非常相符	a.一点也不相符	c.与我中等强度相符	e.与我极其相符	b.与我有一点相符	d.与我非常相符	d.与我非常相符	e.与我极其相符	e.与我极其相符	d.与我非常相符	d.与我非常相符	e.与我极其相符	d.与我非常相符	b.与我有一点相符	是	否	否	是	是	否	否	否	是	否	否	否	否	否	是	符合	符合	不确定	符合	极符合	符合	符合
176	2024/7/2 8:57:44	331秒	微信	N/A	60	男	24-26	硕士在读	C.中等强度较激烈持久的运动（如骑自行车跑步打乒乓球等）	A.10分钟以下	B.每周3至5次	B.旅游、郊游┋C.体育舞蹈┋D.球类┋G.健身器活动	c.与我中等强度相符	b.与我有一点相符	e.与我极其相符	b.与我有一点相符	a.一点也不相符	d.与我非常相符	b.与我有一点相符	a.一点也不相符	b.与我有一点相符	c.与我中等强度相符	a.一点也不相符	a.一点也不相符	c.与我中等强度相符	a.一点也不相符	e.与我极其相符	是	是	否	是	否	是	是	是	否	是	是	是	否	是	是	不符合	极不符合	不确定	不符合	极不符合	不确定	极不符合
177	2024/7/2 8:58:26	283秒	微信	N/A	124	男	21-23	本科在读	C.中等强度较激烈持久的运动（如骑自行车跑步打乒乓球等）	B.11至20分钟	D.大约每天1次	C.体育舞蹈┋D.球类┋I.其他	d.与我非常相符	e.与我极其相符	b.与我有一点相符	c.与我中等强度相符	d.与我非常相符	a.一点也不相符	e.与我极其相符	e.与我极其相符	e.与我极其相符	e.与我极其相符	d.与我非常相符	d.与我非常相符	e.与我极其相符	c.与我中等强度相符	b.与我有一点相符	是	是	否	是	是	是	是	否	是	是	是	是	是	是	是	符合	极符合	符合	不确定	符合	极符合	极符合
178	2024/7/2 8:59:19	378秒	微信	N/A	62	女	27-29	博士在读	E.呼吸急促，出汗很多的大强度的持久的运动（如赛跑、成套健美操练习、游泳等）	D.31至59分钟	A.一个月1次以下	A.散步、跑步┋B.旅游、郊游┋C.体育舞蹈	b.与我有一点相符	a.一点也不相符	e.与我极其相符	a.一点也不相符	c.与我中等强度相符	d.与我非常相符	c.与我中等强度相符	a.一点也不相符	a.一点也不相符	a.一点也不相符	b.与我有一点相符	b.与我有一点相符	c.与我中等强度相符	b.与我有一点相符	e.与我极其相符	是	是	是	否	是	否	否	否	是	是	是	是	否	否	是	不符合	极不符合	极不符合	极不符合	极不符合	极不符合	极不符合
179	2024/7/2 8:59:52	404秒	微信	N/A	119	女	18-20	本科在读	B.小强度的不太紧张的运动（如消遣娱乐性的打排球、乒乓球、慢跑、打太极拳等）	A.10分钟以下	B.每周3至5次	A.散步、跑步┋C.体育舞蹈┋E.跳绳	e.与我极其相符	e.与我极其相符	a.一点也不相符	e.与我极其相符	e.与我极其相符	a.一点也不相符	e.与我极其相符	e.与我极其相符	d.与我非常相符	d.与我非常相符	c.与我中等强度相符	d.与我非常相符	d.与我非常相符	e.与我极其相符	a.一点也不相符	否	是	是	是	是	否	否	否	否	是	否	否	否	是	是	不确定	符合	不确定	符合	符合	极符合	极符合
180	2024/7/2 9:00:33	347秒	微信	N/A	125	男	21-23	本科在读	D.呼吸急促、出汗很多的大强度的，但不持久的运动（如打羽毛球、篮球、网球、足球等）	C.21至30分钟	D.大约每天1次	A.散步、跑步┋D.球类	e.与我极其相符	e.与我极其相符	b.与我有一点相符	e.与我极其相符	e.与我极其相符	a.一点也不相符	e.与我极其相符	e.与我极其相符	d.与我非常相符	e.与我极其相符	d.与我非常相符	d.与我非常相符	e.与我极其相符	c.与我中等强度相符	b.与我有一点相符	是	否	是	否	否	否	否	否	是	否	否	否	是	否	否	极符合	符合	符合	符合	符合	极符合	极符合
181	2024/7/2 9:01:19	304秒	微信	N/A	119	男	21-23	本科在读	A.轻微运动（如散步、做广播体操、打门球等）	B.11至20分钟	A.一个月1次以下	D.球类┋E.跳绳	d.与我非常相符	c.与我中等强度相符	b.与我有一点相符	e.与我极其相符	e.与我极其相符	b.与我有一点相符	e.与我极其相符	d.与我非常相符	d.与我非常相符	c.与我中等强度相符	d.与我非常相符	e.与我极其相符	d.与我非常相符	c.与我中等强度相符	b.与我有一点相符	否	是	否	是	是	是	是	否	是	是	否	否	否	是	否	极符合	极符合	极符合	极符合	符合	极符合	极符合
182	2024/7/2 9:01:53	372秒	微信	N/A	116	男	18-20	本科在读	B.小强度的不太紧张的运动（如消遣娱乐性的打排球、乒乓球、慢跑、打太极拳等）	C.21至30分钟	C.一个月2至3次	A.散步、跑步┋D.球类	d.与我非常相符	e.与我极其相符	b.与我有一点相符	e.与我极其相符	e.与我极其相符	b.与我有一点相符	d.与我非常相符	c.与我中等强度相符	d.与我非常相符	c.与我中等强度相符	c.与我中等强度相符	c.与我中等强度相符	c.与我中等强度相符	e.与我极其相符	c.与我中等强度相符	是	是	否	是	否	否	否	是	否	是	是	是	是	是	否	不确定	极符合	符合	符合	极符合	符合	极符合
183	2024/7/2 9:02:41	259秒	微信	N/A	116	男	18-20	本科在读	A.轻微运动（如散步、做广播体操、打门球等）	D.31至59分钟	B.每周3至5次	D.球类┋E.跳绳┋F.太极拳、养生术	d.与我非常相符	d.与我非常相符	b.与我有一点相符	e.与我极其相符	e.与我极其相符	b.与我有一点相符	c.与我中等强度相符	d.与我非常相符	d.与我非常相符	e.与我极其相符	d.与我非常相符	d.与我非常相符	e.与我极其相符	c.与我中等强度相符	b.与我有一点相符	是	是	否	是	是	否	是	是	否	是	否	否	是	否	否	符合	符合	极符合	不确定	极符合	极符合	符合
184	2024/7/2 9:03:23	395秒	微信	N/A	126	女	21-23	专科在读	C.中等强度较激烈持久的运动（如骑自行车跑步打乒乓球等）	A.10分钟以下	A.一个月1次以下	A.散步、跑步┋D.球类	d.与我非常相符	e.与我极其相符	b.与我有一点相符	e.与我极其相符	e.与我极其相符	a.一点也不相符	d.与我非常相符	e.与我极其相符	e.与我极其相符	d.与我非常相符	d.与我非常相符	d.与我非常相符	e.与我极其相符	d.与我非常相符	a.一点也不相符	是	是	是	是	是	是	否	是	否	否	否	是	是	否	否	符合	极符合	极符合	极符合	极符合	符合	极符合
185	2024/7/2 9:04:12	333秒	微信	N/A	125	男	21-23	专科在读	E.呼吸急促，出汗很多的大强度的持久的运动（如赛跑、成套健美操练习、游泳等）	D.31至59分钟	A.一个月1次以下	B.旅游、郊游┋C.体育舞蹈┋E.跳绳	d.与我非常相符	e.与我极其相符	b.与我有一点相符	e.与我极其相符	d.与我非常相符	a.一点也不相符	c.与我中等强度相符	e.与我极其相符	d.与我非常相符	e.与我极其相符	e.与我极其相符	e.与我极其相符	e.与我极其相符	e.与我极其相符	c.与我中等强度相符	是	是	是	否	是	否	是	否	是	否	是	否	否	否	否	极符合	符合	符合	不确定	符合	极符合	极符合
186	2024/7/2 9:04:58	307秒	微信	N/A	125	男	18-20	本科在读	B.小强度的不太紧张的运动（如消遣娱乐性的打排球、乒乓球、慢跑、打太极拳等）	C.21至30分钟	E.每周1到2次	D.球类┋E.跳绳	e.与我极其相符	e.与我极其相符	b.与我有一点相符	d.与我非常相符	d.与我非常相符	a.一点也不相符	e.与我极其相符	d.与我非常相符	d.与我非常相符	d.与我非常相符	d.与我非常相符	e.与我极其相符	c.与我中等强度相符	d.与我非常相符	c.与我中等强度相符	是	是	否	是	是	否	是	否	是	是	是	是	是	是	否	不确定	符合	符合	极符合	极符合	极符合	极符合
187	2024/7/2 9:05:34	389秒	微信	N/A	118	女	21-23	专科在读	D.呼吸急促、出汗很多的大强度的，但不持久的运动（如打羽毛球、篮球、网球、足球等）	B.11至20分钟	A.一个月1次以下	D.球类┋E.跳绳┋F.太极拳、养生术	c.与我中等强度相符	d.与我非常相符	a.一点也不相符	d.与我非常相符	d.与我非常相符	b.与我有一点相符	c.与我中等强度相符	d.与我非常相符	c.与我中等强度相符	e.与我极其相符	e.与我极其相符	e.与我极其相符	d.与我非常相符	d.与我非常相符	b.与我有一点相符	是	是	是	否	是	是	否	是	是	是	是	否	是	是	否	符合	符合	符合	极符合	不确定	符合	符合
188	2024/7/2 9:05:56	398秒	微信	N/A	61	男	27-29	博士在读	E.呼吸急促，出汗很多的大强度的持久的运动（如赛跑、成套健美操练习、游泳等）	C.21至30分钟	B.每周3至5次	A.散步、跑步┋B.旅游、郊游	b.与我有一点相符	b.与我有一点相符	c.与我中等强度相符	c.与我中等强度相符	b.与我有一点相符	e.与我极其相符	a.一点也不相符	c.与我中等强度相符	b.与我有一点相符	b.与我有一点相符	b.与我有一点相符	b.与我有一点相符	b.与我有一点相符	b.与我有一点相符	e.与我极其相符	是	是	否	是	否	否	否	是	否	否	否	否	是	否	否	极不符合	极不符合	不符合	不符合	不符合	极不符合	不符合
189	2024/7/2 9:06:29	395秒	微信	N/A	69	女	24-26	硕士在读	E.呼吸急促，出汗很多的大强度的持久的运动（如赛跑、成套健美操练习、游泳等）	C.21至30分钟	E.每周1到2次	B.旅游、郊游┋G.健身器活动	b.与我有一点相符	a.一点也不相符	e.与我极其相符	b.与我有一点相符	b.与我有一点相符	c.与我中等强度相符	c.与我中等强度相符	a.一点也不相符	b.与我有一点相符	a.一点也不相符	a.一点也不相符	c.与我中等强度相符	b.与我有一点相符	b.与我有一点相符	d.与我非常相符	否	是	否	是	是	否	否	否	是	否	是	否	否	否	否	不符合	不确定	极不符合	不符合	极不符合	不确定	不符合
190	2024/7/2 9:07:14	303秒	微信	N/A	112	男	21-23	本科在读	A.轻微运动（如散步、做广播体操、打门球等）	B.11至20分钟	A.一个月1次以下	A.散步、跑步┋B.旅游、郊游┋C.体育舞蹈	d.与我非常相符	d.与我非常相符	a.一点也不相符	c.与我中等强度相符	e.与我极其相符	b.与我有一点相符	d.与我非常相符	e.与我极其相符	d.与我非常相符	e.与我极其相符	c.与我中等强度相符	d.与我非常相符	c.与我中等强度相符	d.与我非常相符	b.与我有一点相符	否	否	是	否	否	否	否	是	否	否	是	否	是	是	是	符合	极符合	极符合	极符合	符合	极符合	符合
191	2024/7/2 9:07:39	257秒	微信	N/A	56	男	24-26	硕士在读	B.小强度的不太紧张的运动（如消遣娱乐性的打排球、乒乓球、慢跑、打太极拳等）	C.21至30分钟	A.一个月1次以下	A.散步、跑步┋B.旅游、郊游┋C.体育舞蹈	b.与我有一点相符	a.一点也不相符	e.与我极其相符	a.一点也不相符	a.一点也不相符	d.与我非常相符	b.与我有一点相符	b.与我有一点相符	a.一点也不相符	a.一点也不相符	a.一点也不相符	a.一点也不相符	b.与我有一点相符	a.一点也不相符	e.与我极其相符	是	否	是	是	是	否	是	是	否	否	是	否	否	是	是	不符合	不符合	极不符合	不确定	不符合	极不符合	极不符合
192	2024/7/2 9:08:25	360秒	微信	N/A	123	女	18-20	本科在读	A.轻微运动（如散步、做广播体操、打门球等）	C.21至30分钟	E.每周1到2次	B.旅游、郊游┋G.健身器活动┋I.其他	c.与我中等强度相符	e.与我极其相符	c.与我中等强度相符	e.与我极其相符	d.与我非常相符	a.一点也不相符	e.与我极其相符	e.与我极其相符	d.与我非常相符	e.与我极其相符	d.与我非常相符	d.与我非常相符	e.与我极其相符	e.与我极其相符	b.与我有一点相符	是	否	否	是	是	是	是	否	是	是	是	是	是	是	是	符合	符合	不确定	符合	符合	符合	符合
193	2024/7/2 9:08:58	288秒	微信	N/A	59	女	27-29	博士在读	C.中等强度较激烈持久的运动（如骑自行车跑步打乒乓球等）	B.11至20分钟	A.一个月1次以下	C.体育舞蹈┋F.太极拳、养生术	a.一点也不相符	c.与我中等强度相符	e.与我极其相符	b.与我有一点相符	b.与我有一点相符	e.与我极其相符	b.与我有一点相符	b.与我有一点相符	c.与我中等强度相符	b.与我有一点相符	b.与我有一点相符	a.一点也不相符	b.与我有一点相符	a.一点也不相符	e.与我极其相符	是	否	否	是	是	是	是	是	否	是	否	否	是	是	是	极不符合	不符合	极不符合	不符合	极不符合	不符合	极不符合
194	2024/7/2 9:09:43	403秒	微信	N/A	117	女	18-20	本科在读	A.轻微运动（如散步、做广播体操、打门球等）	B.11至20分钟	A.一个月1次以下	B.旅游、郊游┋D.球类	e.与我极其相符	d.与我非常相符	c.与我中等强度相符	d.与我非常相符	e.与我极其相符	b.与我有一点相符	e.与我极其相符	e.与我极其相符	e.与我极其相符	e.与我极其相符	d.与我非常相符	e.与我极其相符	c.与我中等强度相符	d.与我非常相符	b.与我有一点相符	否	否	是	是	是	否	是	是	是	否	是	是	否	否	否	极符合	符合	符合	不确定	极符合	符合	符合
195	2024/7/2 9:10:12	295秒	微信	N/A	63	男	27-29	博士在读	C.中等强度较激烈持久的运动（如骑自行车跑步打乒乓球等）	B.11至20分钟	C.一个月2至3次	A.散步、跑步┋B.旅游、郊游┋F.太极拳、养生术	a.一点也不相符	a.一点也不相符	d.与我非常相符	b.与我有一点相符	c.与我中等强度相符	d.与我非常相符	a.一点也不相符	b.与我有一点相符	a.一点也不相符	b.与我有一点相符	a.一点也不相符	c.与我中等强度相符	b.与我有一点相符	a.一点也不相符	d.与我非常相符	是	否	是	是	否	是	否	否	是	否	是	是	是	是	否	不符合	不符合	不符合	极不符合	极不符合	不确定	极不符合
196	2024/7/2 9:10:36	361秒	微信	N/A	116	男	21-23	本科在读	C.中等强度较激烈持久的运动（如骑自行车跑步打乒乓球等）	B.11至20分钟	B.每周3至5次	A.散步、跑步┋B.旅游、郊游┋C.体育舞蹈	e.与我极其相符	d.与我非常相符	b.与我有一点相符	e.与我极其相符	e.与我极其相符	b.与我有一点相符	e.与我极其相符	e.与我极其相符	d.与我非常相符	d.与我非常相符	e.与我极其相符	d.与我非常相符	c.与我中等强度相符	e.与我极其相符	c.与我中等强度相符	是	否	是	是	否	是	是	否	否	否	是	是	是	否	否	符合	不确定	符合	极符合	符合	不确定	符合
197	2024/7/2 9:11:16	338秒	微信	N/A	119	女	21-23	本科在读	C.中等强度较激烈持久的运动（如骑自行车跑步打乒乓球等）	A.10分钟以下	E.每周1到2次	A.散步、跑步┋B.旅游、郊游┋D.球类	d.与我非常相符	d.与我非常相符	a.一点也不相符	e.与我极其相符	d.与我非常相符	c.与我中等强度相符	d.与我非常相符	c.与我中等强度相符	d.与我非常相符	e.与我极其相符	c.与我中等强度相符	d.与我非常相符	e.与我极其相符	c.与我中等强度相符	c.与我中等强度相符	否	是	否	是	否	是	否	是	是	否	是	是	否	否	是	极符合	极符合	极符合	符合	符合	极符合	符合
198	2024/7/2 9:11:56	272秒	微信	N/A	115	女	18-20	专科在读	D.呼吸急促、出汗很多的大强度的，但不持久的运动（如打羽毛球、篮球、网球、足球等）	B.11至20分钟	D.大约每天1次	B.旅游、郊游┋C.体育舞蹈┋E.跳绳	c.与我中等强度相符	e.与我极其相符	b.与我有一点相符	d.与我非常相符	d.与我非常相符	b.与我有一点相符	c.与我中等强度相符	d.与我非常相符	c.与我中等强度相符	e.与我极其相符	d.与我非常相符	e.与我极其相符	d.与我非常相符	e.与我极其相符	b.与我有一点相符	是	否	是	否	否	否	否	否	是	否	否	否	是	是	是	符合	符合	极符合	不确定	符合	极符合	符合
199	2024/7/2 9:12:41	269秒	微信	N/A	126	女	21-23	本科在读	C.中等强度较激烈持久的运动（如骑自行车跑步打乒乓球等）	C.21至30分钟	A.一个月1次以下	B.旅游、郊游┋C.体育舞蹈	d.与我非常相符	e.与我极其相符	a.一点也不相符	e.与我极其相符	d.与我非常相符	a.一点也不相符	d.与我非常相符	c.与我中等强度相符	d.与我非常相符	e.与我极其相符	e.与我极其相符	e.与我极其相符	e.与我极其相符	e.与我极其相符	a.一点也不相符	是	否	否	是	是	否	否	是	否	否	是	否	是	是	否	符合	极符合	符合	极符合	极符合	符合	极符合
200	2024/7/2 9:13:09	260秒	微信	N/A	124	女	18-20	专科在读	C.中等强度较激烈持久的运动（如骑自行车跑步打乒乓球等）	C.21至30分钟	E.每周1到2次	B.旅游、郊游┋C.体育舞蹈┋D.球类┋G.健身器活动	c.与我中等强度相符	d.与我非常相符	b.与我有一点相符	d.与我非常相符	e.与我极其相符	b.与我有一点相符	e.与我极其相符	e.与我极其相符	d.与我非常相符	d.与我非常相符	d.与我非常相符	d.与我非常相符	e.与我极其相符	e.与我极其相符	b.与我有一点相符	是	是	否	否	是	否	是	是	否	否	是	否	否	是	否	符合	符合	极符合	极符合	极符合	不确定	极符合
201	2024/7/2 9:13:32	343秒	微信	N/A	120	男	21-23	本科在读	C.中等强度较激烈持久的运动（如骑自行车跑步打乒乓球等）	A.10分钟以下	C.一个月2至3次	B.旅游、郊游┋C.体育舞蹈┋E.跳绳	e.与我极其相符	d.与我非常相符	a.一点也不相符	d.与我非常相符	e.与我极其相符	b.与我有一点相符	e.与我极其相符	d.与我非常相符	e.与我极其相符	e.与我极其相符	e.与我极其相符	d.与我非常相符	e.与我极其相符	e.与我极其相符	a.一点也不相符	否	是	否	是	是	否	否	否	否	是	是	是	是	否	否	符合	符合	符合	不确定	不确定	极符合	符合
202	2024/7/2 9:14:05	255秒	微信	N/A	121	女	21-23	本科在读	B.小强度的不太紧张的运动（如消遣娱乐性的打排球、乒乓球、慢跑、打太极拳等）	E.60分钟以上	B.每周3至5次	B.旅游、郊游┋C.体育舞蹈┋E.跳绳	d.与我非常相符	e.与我极其相符	a.一点也不相符	e.与我极其相符	d.与我非常相符	c.与我中等强度相符	d.与我非常相符	d.与我非常相符	e.与我极其相符	e.与我极其相符	c.与我中等强度相符	e.与我极其相符	d.与我非常相符	d.与我非常相符	b.与我有一点相符	是	否	是	是	是	是	否	否	否	否	否	是	否	否	是	符合	符合	符合	极符合	极符合	极符合	极符合
203	2024/7/2 9:14:51	324秒	微信	N/A	61	男	27-29	博士在读	A.轻微运动（如散步、做广播体操、打门球等）	C.21至30分钟	E.每周1到2次	A.散步、跑步┋B.旅游、郊游┋C.体育舞蹈	a.一点也不相符	b.与我有一点相符	d.与我非常相符	a.一点也不相符	a.一点也不相符	e.与我极其相符	a.一点也不相符	a.一点也不相符	c.与我中等强度相符	b.与我有一点相符	b.与我有一点相符	b.与我有一点相符	b.与我有一点相符	b.与我有一点相符	d.与我非常相符	否	是	否	否	是	否	是	是	否	否	是	是	否	是	否	不符合	不符合	极不符合	不确定	不符合	极不符合	极不符合
204	2024/7/2 9:15:25	346秒	微信	N/A	57	女	24-26	硕士在读	C.中等强度较激烈持久的运动（如骑自行车跑步打乒乓球等）	D.31至59分钟	A.一个月1次以下	C.体育舞蹈┋D.球类┋E.跳绳	b.与我有一点相符	b.与我有一点相符	d.与我非常相符	a.一点也不相符	c.与我中等强度相符	d.与我非常相符	b.与我有一点相符	b.与我有一点相符	b.与我有一点相符	a.一点也不相符	a.一点也不相符	b.与我有一点相符	a.一点也不相符	a.一点也不相符	d.与我非常相符	否	是	否	否	是	否	是	否	是	是	是	是	否	否	否	极不符合	极不符合	极不符合	极不符合	不符合	极不符合	极不符合
205	2024/7/2 9:16:13	343秒	微信	N/A	124	女	18-20	本科在读	A.轻微运动（如散步、做广播体操、打门球等）	C.21至30分钟	B.每周3至5次	A.散步、跑步┋B.旅游、郊游┋D.球类	e.与我极其相符	c.与我中等强度相符	a.一点也不相符	d.与我非常相符	e.与我极其相符	b.与我有一点相符	d.与我非常相符	e.与我极其相符	d.与我非常相符	d.与我非常相符	e.与我极其相符	e.与我极其相符	e.与我极其相符	e.与我极其相符	a.一点也不相符	否	否	否	否	是	否	否	否	否	是	是	是	是	否	是	极符合	符合	极符合	不确定	极符合	极符合	符合
206	2024/7/2 9:16:55	303秒	微信	N/A	58	女	24-26	硕士在读	B.小强度的不太紧张的运动（如消遣娱乐性的打排球、乒乓球、慢跑、打太极拳等）	C.21至30分钟	C.一个月2至3次	A.散步、跑步┋B.旅游、郊游	b.与我有一点相符	a.一点也不相符	d.与我非常相符	b.与我有一点相符	b.与我有一点相符	d.与我非常相符	b.与我有一点相符	a.一点也不相符	b.与我有一点相符	b.与我有一点相符	a.一点也不相符	a.一点也不相符	b.与我有一点相符	c.与我中等强度相符	e.与我极其相符	否	是	是	否	否	是	否	是	否	否	否	否	是	否	是	不符合	不符合	极不符合	极不符合	不符合	不符合	不符合
207	2024/7/2 9:17:44	265秒	微信	N/A	118	男	21-23	本科在读	B.小强度的不太紧张的运动（如消遣娱乐性的打排球、乒乓球、慢跑、打太极拳等）	D.31至59分钟	B.每周3至5次	B.旅游、郊游┋D.球类	e.与我极其相符	c.与我中等强度相符	b.与我有一点相符	e.与我极其相符	e.与我极其相符	a.一点也不相符	e.与我极其相符	e.与我极其相符	c.与我中等强度相符	e.与我极其相符	e.与我极其相符	c.与我中等强度相符	d.与我非常相符	d.与我非常相符	a.一点也不相符	否	否	否	否	否	否	是	是	是	否	否	否	否	是	是	符合	符合	极符合	极符合	极符合	不确定	符合
208	2024/7/2 9:18:30	334秒	微信	N/A	120	男	18-20	本科在读	D.呼吸急促、出汗很多的大强度的，但不持久的运动（如打羽毛球、篮球、网球、足球等）	C.21至30分钟	B.每周3至5次	C.体育舞蹈┋D.球类┋E.跳绳	c.与我中等强度相符	c.与我中等强度相符	b.与我有一点相符	e.与我极其相符	c.与我中等强度相符	b.与我有一点相符	d.与我非常相符	e.与我极其相符	e.与我极其相符	d.与我非常相符	e.与我极其相符	d.与我非常相符	d.与我非常相符	e.与我极其相符	a.一点也不相符	是	是	否	是	是	是	否	是	是	是	是	是	是	否	否	极符合	符合	不确定	符合	符合	不确定	符合
209	2024/7/2 9:19:04	366秒	微信	N/A	123	男	18-20	专科在读	E.呼吸急促，出汗很多的大强度的持久的运动（如赛跑、成套健美操练习、游泳等）	A.10分钟以下	B.每周3至5次	A.散步、跑步┋B.旅游、郊游┋F.太极拳、养生术	d.与我非常相符	e.与我极其相符	c.与我中等强度相符	d.与我非常相符	d.与我非常相符	a.一点也不相符	d.与我非常相符	c.与我中等强度相符	e.与我极其相符	c.与我中等强度相符	e.与我极其相符	e.与我极其相符	d.与我非常相符	c.与我中等强度相符	a.一点也不相符	是	否	否	是	是	否	否	是	否	是	是	否	否	是	否	极符合	极符合	符合	符合	极符合	极符合	极符合
210	2024/7/2 9:19:55	405秒	微信	N/A	115	女	18-20	本科在读	B.小强度的不太紧张的运动（如消遣娱乐性的打排球、乒乓球、慢跑、打太极拳等）	A.10分钟以下	C.一个月2至3次	A.散步、跑步┋B.旅游、郊游┋D.球类	e.与我极其相符	d.与我非常相符	b.与我有一点相符	e.与我极其相符	d.与我非常相符	b.与我有一点相符	d.与我非常相符	e.与我极其相符	e.与我极其相符	d.与我非常相符	d.与我非常相符	d.与我非常相符	c.与我中等强度相符	d.与我非常相符	b.与我有一点相符	否	是	否	否	否	否	否	是	否	否	是	否	否	是	是	符合	极符合	符合	极符合	极符合	不确定	符合
211	2024/7/2 9:20:21	354秒	微信	N/A	118	女	21-23	本科在读	A.轻微运动（如散步、做广播体操、打门球等）	A.10分钟以下	A.一个月1次以下	B.旅游、郊游┋C.体育舞蹈	d.与我非常相符	e.与我极其相符	b.与我有一点相符	c.与我中等强度相符	e.与我极其相符	b.与我有一点相符	d.与我非常相符	e.与我极其相符	e.与我极其相符	e.与我极其相符	e.与我极其相符	e.与我极其相符	e.与我极其相符	e.与我极其相符	b.与我有一点相符	否	是	是	否	否	否	否	是	是	是	否	是	是	是	是	符合	符合	符合	符合	符合	极符合	不确定
212	2024/7/2 9:21:02	266秒	微信	N/A	126	男	18-20	专科在读	A.轻微运动（如散步、做广播体操、打门球等）	D.31至59分钟	E.每周1到2次	A.散步、跑步┋B.旅游、郊游┋F.太极拳、养生术	c.与我中等强度相符	e.与我极其相符	a.一点也不相符	d.与我非常相符	e.与我极其相符	b.与我有一点相符	c.与我中等强度相符	e.与我极其相符	e.与我极其相符	e.与我极其相符	e.与我极其相符	d.与我非常相符	d.与我非常相符	c.与我中等强度相符	a.一点也不相符	是	是	否	是	是	是	是	是	否	是	是	是	是	是	否	符合	符合	符合	符合	极符合	符合	符合
213	2024/7/2 9:22:09	329秒	微信	N/A	65	女	27-29	博士在读	C.中等强度较激烈持久的运动（如骑自行车跑步打乒乓球等）	B.11至20分钟	D.大约每天1次	A.散步、跑步┋B.旅游、郊游	b.与我有一点相符	b.与我有一点相符	e.与我极其相符	c.与我中等强度相符	a.一点也不相符	d.与我非常相符	a.一点也不相符	b.与我有一点相符	c.与我中等强度相符	a.一点也不相符	a.一点也不相符	b.与我有一点相符	a.一点也不相符	b.与我有一点相符	e.与我极其相符	否	是	是	是	是	是	是	是	是	是	是	否	是	否	是	极不符合	不符合	极不符合	不符合	不符合	极不符合	极不符合
214	2024/7/2 9:22:51	283秒	微信	N/A	130	男	21-23	本科在读	B.小强度的不太紧张的运动（如消遣娱乐性的打排球、乒乓球、慢跑、打太极拳等）	C.21至30分钟	D.大约每天1次	B.旅游、郊游┋C.体育舞蹈┋E.跳绳	e.与我极其相符	e.与我极其相符	b.与我有一点相符	e.与我极其相符	e.与我极其相符	a.一点也不相符	e.与我极其相符	e.与我极其相符	e.与我极其相符	d.与我非常相符	e.与我极其相符	d.与我非常相符	d.与我非常相符	e.与我极其相符	b.与我有一点相符	是	是	是	否	是	是	否	是	否	否	是	否	是	否	否	极符合	符合	极符合	极符合	极符合	极符合	不确定
215	2024/7/2 9:23:36	285秒	微信	N/A	118	女	18-20	专科在读	C.中等强度较激烈持久的运动（如骑自行车跑步打乒乓球等）	A.10分钟以下	B.每周3至5次	A.散步、跑步┋B.旅游、郊游┋C.体育舞蹈	e.与我极其相符	e.与我极其相符	c.与我中等强度相符	d.与我非常相符	c.与我中等强度相符	b.与我有一点相符	e.与我极其相符	e.与我极其相符	d.与我非常相符	d.与我非常相符	d.与我非常相符	c.与我中等强度相符	e.与我极其相符	d.与我非常相符	c.与我中等强度相符	否	是	否	是	是	否	是	是	是	是	是	是	是	否	否	符合	极符合	极符合	符合	符合	符合	符合
216	2024/7/2 9:24:03	341秒	微信	N/A	123	女	21-23	专科在读	E.呼吸急促，出汗很多的大强度的持久的运动（如赛跑、成套健美操练习、游泳等）	A.10分钟以下	E.每周1到2次	C.体育舞蹈┋D.球类	d.与我非常相符	e.与我极其相符	c.与我中等强度相符	d.与我非常相符	d.与我非常相符	b.与我有一点相符	d.与我非常相符	e.与我极其相符	d.与我非常相符	e.与我极其相符	e.与我极其相符	e.与我极其相符	e.与我极其相符	e.与我极其相符	b.与我有一点相符	是	是	否	否	否	否	否	是	否	是	是	否	是	是	否	不确定	符合	符合	符合	极符合	极符合	极符合
217	2024/7/2 9:24:55	279秒	微信	N/A	69	女	24-26	硕士在读	E.呼吸急促，出汗很多的大强度的持久的运动（如赛跑、成套健美操练习、游泳等）	D.31至59分钟	B.每周3至5次	C.体育舞蹈┋D.球类	a.一点也不相符	b.与我有一点相符	e.与我极其相符	c.与我中等强度相符	b.与我有一点相符	e.与我极其相符	b.与我有一点相符	b.与我有一点相符	b.与我有一点相符	a.一点也不相符	c.与我中等强度相符	b.与我有一点相符	c.与我中等强度相符	a.一点也不相符	d.与我非常相符	是	是	是	是	是	是	否	是	否	否	是	否	是	否	否	极不符合	不确定	极不符合	不符合	不符合	极不符合	不符合
218	2024/7/2 9:25:24	278秒	微信	N/A	112	男	18-20	本科在读	A.轻微运动（如散步、做广播体操、打门球等）	B.11至20分钟	B.每周3至5次	B.旅游、郊游┋C.体育舞蹈┋E.跳绳	c.与我中等强度相符	d.与我非常相符	b.与我有一点相符	e.与我极其相符	e.与我极其相符	b.与我有一点相符	e.与我极其相符	c.与我中等强度相符	e.与我极其相符	d.与我非常相符	c.与我中等强度相符	d.与我非常相符	d.与我非常相符	e.与我极其相符	b.与我有一点相符	是	是	否	是	否	否	否	是	是	是	是	否	否	否	否	不确定	极符合	符合	符合	极符合	符合	不确定
219	2024/7/2 9:25:49	307秒	微信	N/A	126	女	18-20	本科在读	E.呼吸急促，出汗很多的大强度的持久的运动（如赛跑、成套健美操练习、游泳等）	D.31至59分钟	A.一个月1次以下	D.球类┋E.跳绳	e.与我极其相符	d.与我非常相符	b.与我有一点相符	d.与我非常相符	d.与我非常相符	a.一点也不相符	e.与我极其相符	d.与我非常相符	d.与我非常相符	d.与我非常相符	d.与我非常相符	c.与我中等强度相符	e.与我极其相符	e.与我极其相符	b.与我有一点相符	是	是	否	是	否	是	否	是	否	否	否	是	否	否	是	极符合	极符合	极符合	不确定	极符合	极符合	极符合
220	2024/7/2 12:58:08	160秒	手机提交	直接访问	102	女	24-26	硕士在读	A.轻微运动（如散步、做广播体操、打门球等）	C.21至30分钟	E.每周1到2次	A.散步、跑步┋B.旅游、郊游┋C.体育舞蹈┋F.太极拳、养生术┋H.游泳	b.与我有一点相符	d.与我非常相符	c.与我中等强度相符	c.与我中等强度相符	b.与我有一点相符	c.与我中等强度相符	b.与我有一点相符	e.与我极其相符	d.与我非常相符	c.与我中等强度相符	b.与我有一点相符	c.与我中等强度相符	c.与我中等强度相符	c.与我中等强度相符	c.与我中等强度相符	是	是	否	否	是	是	是	是	是	是	是	是	是	是	是	符合	不符合	符合	不确定	符合	符合	符合
221	2024/7/2 14:20:10	115秒	微信	N/A	83	女	24-26	硕士在读	C.中等强度较激烈持久的运动（如骑自行车跑步打乒乓球等）	D.31至59分钟	B.每周3至5次	A.散步、跑步┋B.旅游、郊游┋C.体育舞蹈┋D.球类┋H.游泳	a.一点也不相符	a.一点也不相符	d.与我非常相符	a.一点也不相符	a.一点也不相符	d.与我非常相符	a.一点也不相符	b.与我有一点相符	b.与我有一点相符	d.与我非常相符	a.一点也不相符	a.一点也不相符	a.一点也不相符	b.与我有一点相符	d.与我非常相符	是	是	否	是	是	是	是	是	是	是	是	是	否	否	是	符合	符合	符合	符合	符合	符合	符合
222	2024/7/2 21:44:52	124秒	微信	N/A	131	女	24-26	硕士在读	B.小强度的不太紧张的运动（如消遣娱乐性的打排球、乒乓球、慢跑、打太极拳等）	C.21至30分钟	C.一个月2至3次	A.散步、跑步┋D.球类┋E.跳绳┋G.健身器活动┋H.游泳	d.与我非常相符	d.与我非常相符	b.与我有一点相符	e.与我极其相符	d.与我非常相符	b.与我有一点相符	d.与我非常相符	e.与我极其相符	e.与我极其相符	c.与我中等强度相符	e.与我极其相符	d.与我非常相符	e.与我极其相符	e.与我极其相符	b.与我有一点相符	是	是	否	是	是	是	是	是	是	是	是	是	是	是	是	极符合	符合	不确定	符合	符合	极符合	极符合
223	2024/7/3 9:23:10	214秒	手机提交	直接访问	106	女	18-20	本科在读	B.小强度的不太紧张的运动（如消遣娱乐性的打排球、乒乓球、慢跑、打太极拳等）	C.21至30分钟	C.一个月2至3次	A.散步、跑步┋B.旅游、郊游	c.与我中等强度相符	d.与我非常相符	b.与我有一点相符	d.与我非常相符	c.与我中等强度相符	b.与我有一点相符	d.与我非常相符	d.与我非常相符	d.与我非常相符	c.与我中等强度相符	c.与我中等强度相符	d.与我非常相符	d.与我非常相符	d.与我非常相符	b.与我有一点相符	是	是	否	是	是	是	是	是	是	是	是	是	否	否	否	符合	不符合	不确定	不确定	不符合	不确定	符合
224	2024/7/3 20:57:03	1158秒	手机提交	直接访问	104	女	18-20	本科在读	A.轻微运动（如散步、做广播体操、打门球等）	B.11至20分钟	A.一个月1次以下	A.散步、跑步┋B.旅游、郊游┋E.跳绳┋F.太极拳、养生术	d.与我非常相符	d.与我非常相符	a.一点也不相符	e.与我极其相符	d.与我非常相符	d.与我非常相符	b.与我有一点相符	e.与我极其相符	e.与我极其相符	a.一点也不相符	b.与我有一点相符	d.与我非常相符	d.与我非常相符	d.与我非常相符	a.一点也不相符	否	否	是	否	否	否	否	否	否	否	否	否	否	否	是	符合	符合	符合	符合	符合	符合	符合
225	2024/7/3 21:44:33	167秒	微信	N/A	107	女	18-20	本科在读	A.轻微运动（如散步、做广播体操、打门球等）	C.21至30分钟	C.一个月2至3次	A.散步、跑步┋B.旅游、郊游┋F.太极拳、养生术	c.与我中等强度相符	c.与我中等强度相符	a.一点也不相符	e.与我极其相符	c.与我中等强度相符	c.与我中等强度相符	c.与我中等强度相符	e.与我极其相符	e.与我极其相符	a.一点也不相符	d.与我非常相符	c.与我中等强度相符	d.与我非常相符	e.与我极其相符	a.一点也不相符	是	是	否	否	是	否	否	是	是	否	是	是	否	否	否	符合	不确定	不符合	不确定	不确定	符合	不确定
226	2024/7/4 18:17:40	256秒	微信	N/A	89	女	18-20	本科在读	B.小强度的不太紧张的运动（如消遣娱乐性的打排球、乒乓球、慢跑、打太极拳等）	B.11至20分钟	E.每周1到2次	A.散步、跑步┋B.旅游、郊游┋C.体育舞蹈	b.与我有一点相符	b.与我有一点相符	b.与我有一点相符	a.一点也不相符	b.与我有一点相符	c.与我中等强度相符	a.一点也不相符	b.与我有一点相符	b.与我有一点相符	c.与我中等强度相符	b.与我有一点相符	b.与我有一点相符	a.一点也不相符	a.一点也不相符	b.与我有一点相符	是	是	否	否	是	是	否	是	是	是	是	是	否	否	是	符合	极符合	符合	不确定	不确定	符合	符合
227	2024/7/4 18:17:58	188秒	微信	N/A	109	女	21-23	本科在读	A.轻微运动（如散步、做广播体操、打门球等）	C.21至30分钟	E.每周1到2次	A.散步、跑步┋C.体育舞蹈	c.与我中等强度相符	d.与我非常相符	a.一点也不相符	e.与我极其相符	e.与我极其相符	a.一点也不相符	d.与我非常相符	e.与我极其相符	c.与我中等强度相符	a.一点也不相符	e.与我极其相符	d.与我非常相符	e.与我极其相符	d.与我非常相符	a.一点也不相符	是	是	否	否	否	否	否	否	否	是	是	否	是	是	是	不确定	不确定	不符合	不确定	不确定	不确定	不符合
228	2024/7/4 22:42:04	211秒	手机提交	直接访问	69	男	21-23	本科在读	A.轻微运动（如散步、做广播体操、打门球等）	B.11至20分钟	C.一个月2至3次	A.散步、跑步┋F.太极拳、养生术	a.一点也不相符	b.与我有一点相符	b.与我有一点相符	b.与我有一点相符	b.与我有一点相符	b.与我有一点相符	a.一点也不相符	b.与我有一点相符	b.与我有一点相符	b.与我有一点相符	a.一点也不相符	a.一点也不相符	a.一点也不相符	b.与我有一点相符	b.与我有一点相符	否	否	否	否	否	否	否	否	否	否	是	是	否	否	否	符合	不确定	不符合	不符合	不符合	不确定	不确定
229	2024/7/4 23:17:55	154秒	手机提交	直接访问	86	男	24-26	本科在读	C.中等强度较激烈持久的运动（如骑自行车跑步打乒乓球等）	B.11至20分钟	C.一个月2至3次	B.旅游、郊游┋E.跳绳	b.与我有一点相符	d.与我非常相符	c.与我中等强度相符	c.与我中等强度相符	c.与我中等强度相符	b.与我有一点相符	c.与我中等强度相符	c.与我中等强度相符	d.与我非常相符	d.与我非常相符	a.一点也不相符	b.与我有一点相符	c.与我中等强度相符	d.与我非常相符	b.与我有一点相符	是	否	否	是	否	是	否	否	否	是	否	否	否	是	否	符合	不符合	不符合	不确定	不符合	符合	不确定
230	2024/7/5 10:11:47	204秒	微信	N/A	98	女	21-23	本科在读	C.中等强度较激烈持久的运动（如骑自行车跑步打乒乓球等）	B.11至20分钟	A.一个月1次以下	A.散步、跑步┋B.旅游、郊游┋D.球类	c.与我中等强度相符	c.与我中等强度相符	a.一点也不相符	d.与我非常相符	d.与我非常相符	a.一点也不相符	c.与我中等强度相符	d.与我非常相符	e.与我极其相符	a.一点也不相符	d.与我非常相符	b.与我有一点相符	b.与我有一点相符	d.与我非常相符	a.一点也不相符	否	否	是	否	否	否	否	否	否	否	是	是	否	是	是	不确定	不确定	极不符合	不符合	不符合	符合	符合
231	2024/7/5 10:18:09	154秒	微信	N/A	98	女	21-23	本科在读	A.轻微运动（如散步、做广播体操、打门球等）	A.10分钟以下	A.一个月1次以下	B.旅游、郊游┋D.球类	b.与我有一点相符	b.与我有一点相符	a.一点也不相符	b.与我有一点相符	c.与我中等强度相符	a.一点也不相符	b.与我有一点相符	c.与我中等强度相符	c.与我中等强度相符	b.与我有一点相符	b.与我有一点相符	d.与我非常相符	d.与我非常相符	c.与我中等强度相符	c.与我中等强度相符	是	是	否	是	是	是	是	是	是	是	是	是	否	否	是	符合	符合	符合	不确定	符合	符合	不确定
232	2024/7/5 11:03:02	115秒	微信	N/A	85	女	21-23	本科在读	B.小强度的不太紧张的运动（如消遣娱乐性的打排球、乒乓球、慢跑、打太极拳等）	C.21至30分钟	C.一个月2至3次	A.散步、跑步	b.与我有一点相符	b.与我有一点相符	b.与我有一点相符	b.与我有一点相符	b.与我有一点相符	b.与我有一点相符	b.与我有一点相符	b.与我有一点相符	b.与我有一点相符	b.与我有一点相符	b.与我有一点相符	b.与我有一点相符	b.与我有一点相符	b.与我有一点相符	b.与我有一点相符	是	是	是	是	是	否	否	否	否	是	是	是	是	是	是	符合	不符合	不符合	符合	不符合	符合	符合
233	2024/7/5 11:38:28	185秒	微信	N/A	95	女	21-23	本科在读	B.小强度的不太紧张的运动（如消遣娱乐性的打排球、乒乓球、慢跑、打太极拳等）	C.21至30分钟	C.一个月2至3次	A.散步、跑步┋D.球类	b.与我有一点相符	c.与我中等强度相符	c.与我中等强度相符	d.与我非常相符	d.与我非常相符	c.与我中等强度相符	d.与我非常相符	c.与我中等强度相符	c.与我中等强度相符	d.与我非常相符	d.与我非常相符	e.与我极其相符	d.与我非常相符	c.与我中等强度相符	d.与我非常相符	是	否	否	是	是	否	否	否	否	否	是	是	否	否	否	不确定	不符合	符合	符合	符合	不确定	不确定
234	2024/7/5 11:52:55	174秒	微信	N/A	85	女	24-26	硕士在读	A.轻微运动（如散步、做广播体操、打门球等）	C.21至30分钟	A.一个月1次以下	A.散步、跑步┋D.球类┋H.游泳	a.一点也不相符	b.与我有一点相符	b.与我有一点相符	b.与我有一点相符	a.一点也不相符	a.一点也不相符	a.一点也不相符	b.与我有一点相符	d.与我非常相符	d.与我非常相符	a.一点也不相符	b.与我有一点相符	b.与我有一点相符	b.与我有一点相符	b.与我有一点相符	是	是	否	是	是	是	是	是	是	否	是	是	否	否	否	符合	符合	符合	不确定	不确定	符合	不确定
235	2024/7/5 16:06:10	209秒	微信	N/A	100	女	24-26	硕士在读	D.呼吸急促、出汗很多的大强度的，但不持久的运动（如打羽毛球、篮球、网球、足球等）	D.31至59分钟	C.一个月2至3次	A.散步、跑步┋B.旅游、郊游┋D.球类	a.一点也不相符	b.与我有一点相符	c.与我中等强度相符	d.与我非常相符	d.与我非常相符	d.与我非常相符	a.一点也不相符	c.与我中等强度相符	d.与我非常相符	d.与我非常相符	d.与我非常相符	c.与我中等强度相符	c.与我中等强度相符	d.与我非常相符	d.与我非常相符	是	是	否	是	是	是	是	是	是	是	是	是	否	是	否	符合	符合	不符合	不确定	不确定	符合	符合
236	2024/7/5 16:08:55	153秒	微信	N/A	103	女	18-20	专科在读	A.轻微运动（如散步、做广播体操、打门球等）	D.31至59分钟	E.每周1到2次	A.散步、跑步┋D.球类	b.与我有一点相符	c.与我中等强度相符	b.与我有一点相符	b.与我有一点相符	b.与我有一点相符	b.与我有一点相符	b.与我有一点相符	b.与我有一点相符	b.与我有一点相符	a.一点也不相符	c.与我中等强度相符	b.与我有一点相符	b.与我有一点相符	c.与我中等强度相符	a.一点也不相符	是	是	是	是	是	是	是	是	是	是	是	是	否	否	否	符合	符合	符合	符合	符合	符合	符合
237	2024/7/5 18:04:41	230秒	微信	N/A	105	女	21-23	本科在读	B.小强度的不太紧张的运动（如消遣娱乐性的打排球、乒乓球、慢跑、打太极拳等）	C.21至30分钟	B.每周3至5次	A.散步、跑步┋B.旅游、郊游┋G.健身器活动┋H.游泳	c.与我中等强度相符	d.与我非常相符	b.与我有一点相符	d.与我非常相符	c.与我中等强度相符	a.一点也不相符	c.与我中等强度相符	c.与我中等强度相符	c.与我中等强度相符	a.一点也不相符	d.与我非常相符	c.与我中等强度相符	b.与我有一点相符	b.与我有一点相符	a.一点也不相符	是	是	否	是	是	是	是	是	是	否	是	是	否	是	否	符合	符合	不符合	不确定	不确定	符合	符合
238	2024/7/5 20:54:02	447秒	微信	N/A	66	男	18-20	本科在读	A.轻微运动（如散步、做广播体操、打门球等）	E.60分钟以上	B.每周3至5次	A.散步、跑步┋B.旅游、郊游	b.与我有一点相符	a.一点也不相符	e.与我极其相符	a.一点也不相符	a.一点也不相符	b.与我有一点相符	a.一点也不相符	c.与我中等强度相符	b.与我有一点相符	d.与我非常相符	c.与我中等强度相符	a.一点也不相符	a.一点也不相符	a.一点也不相符	c.与我中等强度相符	是	是	是	是	否	是	是	否	是	是	否	否	是	否	是	不符合	不符合	不确定	不符合	不符合	极不符合	极不符合
239	2024/7/5 20:54:11	491秒	微信	N/A	77	女	18-20	专科在读	C.中等强度较激烈持久的运动（如骑自行车跑步打乒乓球等）	C.21至30分钟	D.大约每天1次	A.散步、跑步┋E.跳绳┋G.健身器活动	e.与我极其相符	a.一点也不相符	d.与我非常相符	c.与我中等强度相符	a.一点也不相符	d.与我非常相符	a.一点也不相符	e.与我极其相符	b.与我有一点相符	c.与我中等强度相符	a.一点也不相符	a.一点也不相符	e.与我极其相符	a.一点也不相符	c.与我中等强度相符	是	是	否	否	是	否	否	是	是	否	是	是	是	是	是	不确定	不符合	极不符合	不确定	符合	不确定	极不符合
240	2024/7/5 20:54:28	547秒	微信	N/A	81	男	18-20	专科在读	B.小强度的不太紧张的运动（如消遣娱乐性的打排球、乒乓球、慢跑、打太极拳等）	B.11至20分钟	D.大约每天1次	D.球类┋G.健身器活动	b.与我有一点相符	e.与我极其相符	c.与我中等强度相符	c.与我中等强度相符	b.与我有一点相符	d.与我非常相符	b.与我有一点相符	b.与我有一点相符	a.一点也不相符	e.与我极其相符	c.与我中等强度相符	a.一点也不相符	c.与我中等强度相符	b.与我有一点相符	b.与我有一点相符	是	是	是	否	否	是	是	是	是	是	否	是	否	是	否	不符合	极不符合	极不符合	极符合	极符合	不符合	极符合
241	2024/7/5 20:54:33	545秒	微信	N/A	72	男	18-20	专科在读	B.小强度的不太紧张的运动（如消遣娱乐性的打排球、乒乓球、慢跑、打太极拳等）	D.31至59分钟	A.一个月1次以下	A.散步、跑步┋B.旅游、郊游┋D.球类	a.一点也不相符	a.一点也不相符	e.与我极其相符	c.与我中等强度相符	a.一点也不相符	c.与我中等强度相符	a.一点也不相符	b.与我有一点相符	a.一点也不相符	d.与我非常相符	b.与我有一点相符	d.与我非常相符	c.与我中等强度相符	d.与我非常相符	e.与我极其相符	否	是	是	是	否	否	否	是	是	是	是	否	否	是	是	不确定	不符合	不符合	不符合	极不符合	极符合	不确定
242	2024/7/5 20:54:43	513秒	微信	N/A	83	男	21-23	本科在读	A.轻微运动（如散步、做广播体操、打门球等）	E.60分钟以上	B.每周3至5次	A.散步、跑步┋B.旅游、郊游┋E.跳绳	d.与我非常相符	b.与我有一点相符	c.与我中等强度相符	c.与我中等强度相符	a.一点也不相符	b.与我有一点相符	a.一点也不相符	b.与我有一点相符	e.与我极其相符	c.与我中等强度相符	c.与我中等强度相符	a.一点也不相符	c.与我中等强度相符	a.一点也不相符	c.与我中等强度相符	是	是	是	否	否	是	是	是	是	是	否	是	否	是	是	极不符合	不符合	极符合	极符合	不符合	极不符合	不符合
243	2024/7/5 20:54:51	506秒	微信	N/A	72	男	18-20	本科在读	E.呼吸急促，出汗很多的大强度的持久的运动（如赛跑、成套健美操练习、游泳等）	B.11至20分钟	A.一个月1次以下	A.散步、跑步┋B.旅游、郊游┋E.跳绳	a.一点也不相符	b.与我有一点相符	c.与我中等强度相符	b.与我有一点相符	a.一点也不相符	c.与我中等强度相符	a.一点也不相符	e.与我极其相符	c.与我中等强度相符	d.与我非常相符	c.与我中等强度相符	b.与我有一点相符	c.与我中等强度相符	a.一点也不相符	e.与我极其相符	否	否	否	否	否	否	是	是	是	否	是	是	是	是	是	极符合	极不符合	不确定	不符合	不确定	不确定	极不符合
244	2024/7/5 20:55:16	422秒	微信	N/A	68	女	21-23	专科在读	E.呼吸急促，出汗很多的大强度的持久的运动（如赛跑、成套健美操练习、游泳等）	B.11至20分钟	B.每周3至5次	B.旅游、郊游┋D.球类┋G.健身器活动	a.一点也不相符	a.一点也不相符	e.与我极其相符	c.与我中等强度相符	c.与我中等强度相符	e.与我极其相符	c.与我中等强度相符	a.一点也不相符	c.与我中等强度相符	c.与我中等强度相符	a.一点也不相符	b.与我有一点相符	e.与我极其相符	e.与我极其相符	d.与我非常相符	是	否	否	否	是	否	是	是	否	是	是	是	是	是	否	极不符合	极不符合	极不符合	极不符合	极不符合	极符合	极不符合
245	2024/7/5 20:55:17	477秒	微信	N/A	63	男	24-26	硕士在读	B.小强度的不太紧张的运动（如消遣娱乐性的打排球、乒乓球、慢跑、打太极拳等）	A.10分钟以下	D.大约每天1次	B.旅游、郊游┋E.跳绳	a.一点也不相符	b.与我有一点相符	e.与我极其相符	b.与我有一点相符	a.一点也不相符	e.与我极其相符	b.与我有一点相符	a.一点也不相符	c.与我中等强度相符	e.与我极其相符	a.一点也不相符	a.一点也不相符	b.与我有一点相符	e.与我极其相符	e.与我极其相符	是	是	是	否	否	否	是	是	是	是	是	否	否	否	是	极符合	极不符合	不确定	不符合	不确定	极不符合	不符合
246	2024/7/5 20:55:25	496秒	微信	N/A	78	女	21-23	专科在读	A.轻微运动（如散步、做广播体操、打门球等）	C.21至30分钟	E.每周1到2次	A.散步、跑步┋B.旅游、郊游	d.与我非常相符	b.与我有一点相符	d.与我非常相符	b.与我有一点相符	a.一点也不相符	a.一点也不相符	b.与我有一点相符	a.一点也不相符	c.与我中等强度相符	c.与我中等强度相符	c.与我中等强度相符	a.一点也不相符	c.与我中等强度相符	c.与我中等强度相符	e.与我极其相符	是	是	是	否	否	是	是	是	是	否	是	是	是	否	是	极符合	极不符合	不确定	不确定	符合	极不符合	极不符合
247	2024/7/5 20:55:37	514秒	微信	N/A	63	女	21-23	本科在读	D.呼吸急促、出汗很多的大强度的，但不持久的运动（如打羽毛球、篮球、网球、足球等）	A.10分钟以下	D.大约每天1次	A.散步、跑步┋E.跳绳┋F.太极拳、养生术	a.一点也不相符	a.一点也不相符	e.与我极其相符	a.一点也不相符	c.与我中等强度相符	d.与我非常相符	a.一点也不相符	a.一点也不相符	c.与我中等强度相符	d.与我非常相符	b.与我有一点相符	b.与我有一点相符	c.与我中等强度相符	b.与我有一点相符	e.与我极其相符	是	是	是	否	是	是	否	是	是	否	是	是	是	是	是	极不符合	极不符合	极不符合	不确定	极不符合	不确定	不符合
248	2024/7/5 20:56:13	446秒	微信	N/A	68	女	30-32	硕士在读	B.小强度的不太紧张的运动（如消遣娱乐性的打排球、乒乓球、慢跑、打太极拳等）	D.31至59分钟	B.每周3至5次	A.散步、跑步┋D.球类┋E.跳绳	a.一点也不相符	e.与我极其相符	d.与我非常相符	a.一点也不相符	a.一点也不相符	e.与我极其相符	a.一点也不相符	a.一点也不相符	c.与我中等强度相符	d.与我非常相符	b.与我有一点相符	c.与我中等强度相符	c.与我中等强度相符	a.一点也不相符	e.与我极其相符	否	是	是	否	否	是	是	是	是	是	否	否	是	是	否	不符合	不符合	不确定	极不符合	极不符合	不符合	不符合
249	2024/7/5 20:56:26	462秒	微信	N/A	73	男	21-23	本科在读	E.呼吸急促，出汗很多的大强度的持久的运动（如赛跑、成套健美操练习、游泳等）	C.21至30分钟	A.一个月1次以下	A.散步、跑步┋B.旅游、郊游┋E.跳绳	a.一点也不相符	b.与我有一点相符	e.与我极其相符	b.与我有一点相符	c.与我中等强度相符	d.与我非常相符	c.与我中等强度相符	a.一点也不相符	a.一点也不相符	e.与我极其相符	d.与我非常相符	a.一点也不相符	b.与我有一点相符	b.与我有一点相符	c.与我中等强度相符	是	是	是	否	是	是	是	是	是	否	是	否	是	是	是	不符合	极不符合	不符合	不确定	符合	极不符合	不确定
250	2024/7/5 20:56:32	419秒	微信	N/A	75	女	30-32	硕士在读	A.轻微运动（如散步、做广播体操、打门球等）	B.11至20分钟	B.每周3至5次	A.散步、跑步┋B.旅游、郊游	a.一点也不相符	a.一点也不相符	c.与我中等强度相符	e.与我极其相符	e.与我极其相符	d.与我非常相符	c.与我中等强度相符	a.一点也不相符	b.与我有一点相符	e.与我极其相符	d.与我非常相符	a.一点也不相符	c.与我中等强度相符	d.与我非常相符	e.与我极其相符	是	否	否	否	是	是	是	是	是	是	否	否	是	是	是	不符合	极符合	极不符合	极不符合	极符合	不符合	极不符合
251	2024/7/5 20:56:38	438秒	微信	N/A	76	男	18-20	专科在读	C.中等强度较激烈持久的运动（如骑自行车跑步打乒乓球等）	B.11至20分钟	C.一个月2至3次	C.体育舞蹈┋E.跳绳	a.一点也不相符	a.一点也不相符	d.与我非常相符	a.一点也不相符	b.与我有一点相符	b.与我有一点相符	c.与我中等强度相符	b.与我有一点相符	a.一点也不相符	e.与我极其相符	a.一点也不相符	b.与我有一点相符	e.与我极其相符	e.与我极其相符	e.与我极其相符	是	否	是	否	是	是	是	是	是	是	是	否	是	否	否	不确定	不确定	不确定	不符合	不确定	极不符合	不符合
252	2024/7/5 20:56:49	526秒	微信	N/A	75	男	24-26	硕士在读	C.中等强度较激烈持久的运动（如骑自行车跑步打乒乓球等）	A.10分钟以下	C.一个月2至3次	F.太极拳、养生术┋G.健身器活动	c.与我中等强度相符	b.与我有一点相符	d.与我非常相符	e.与我极其相符	a.一点也不相符	d.与我非常相符	d.与我非常相符	a.一点也不相符	d.与我非常相符	c.与我中等强度相符	b.与我有一点相符	c.与我中等强度相符	b.与我有一点相符	c.与我中等强度相符	e.与我极其相符	否	是	否	否	否	否	是	否	是	是	是	是	否	是	是	不符合	极不符合	极不符合	极不符合	不符合	不符合	符合
253	2024/7/5 20:56:57	522秒	微信	N/A	69	男	24-26	硕士在读	E.呼吸急促，出汗很多的大强度的持久的运动（如赛跑、成套健美操练习、游泳等）	A.10分钟以下	C.一个月2至3次	A.散步、跑步┋B.旅游、郊游	a.一点也不相符	c.与我中等强度相符	e.与我极其相符	a.一点也不相符	c.与我中等强度相符	e.与我极其相符	e.与我极其相符	b.与我有一点相符	a.一点也不相符	c.与我中等强度相符	a.一点也不相符	a.一点也不相符	b.与我有一点相符	b.与我有一点相符	b.与我有一点相符	否	是	是	否	是	是	是	否	是	是	是	否	是	否	否	不符合	不符合	不确定	不确定	极不符合	不符合	极不符合
254	2024/7/5 20:57:02	477秒	微信	N/A	70	女	27-29	硕士在读	D.呼吸急促、出汗很多的大强度的，但不持久的运动（如打羽毛球、篮球、网球、足球等）	A.10分钟以下	D.大约每天1次	A.散步、跑步┋C.体育舞蹈┋G.健身器活动	c.与我中等强度相符	a.一点也不相符	e.与我极其相符	b.与我有一点相符	c.与我中等强度相符	e.与我极其相符	a.一点也不相符	b.与我有一点相符	c.与我中等强度相符	d.与我非常相符	d.与我非常相符	b.与我有一点相符	a.一点也不相符	a.一点也不相符	e.与我极其相符	是	是	是	是	是	是	是	否	是	是	否	是	是	是	是	极符合	不符合	不符合	不符合	不符合	极不符合	不符合
255	2024/7/5 20:57:06	531秒	微信	N/A	79	女	18-20	本科在读	C.中等强度较激烈持久的运动（如骑自行车跑步打乒乓球等）	C.21至30分钟	A.一个月1次以下	B.旅游、郊游┋C.体育舞蹈┋G.健身器活动	b.与我有一点相符	b.与我有一点相符	d.与我非常相符	b.与我有一点相符	b.与我有一点相符	e.与我极其相符	a.一点也不相符	c.与我中等强度相符	e.与我极其相符	c.与我中等强度相符	c.与我中等强度相符	c.与我中等强度相符	b.与我有一点相符	a.一点也不相符	c.与我中等强度相符	是	否	否	是	是	是	否	是	是	是	否	是	是	是	是	不符合	极符合	极不符合	极符合	不符合	不确定	不确定
256	2024/7/5 20:57:10	553秒	微信	N/A	93	女	27-29	硕士在读	C.中等强度较激烈持久的运动（如骑自行车跑步打乒乓球等）	B.11至20分钟	C.一个月2至3次	A.散步、跑步┋D.球类┋E.跳绳	c.与我中等强度相符	c.与我中等强度相符	d.与我非常相符	e.与我极其相符	b.与我有一点相符	d.与我非常相符	d.与我非常相符	a.一点也不相符	d.与我非常相符	d.与我非常相符	b.与我有一点相符	b.与我有一点相符	c.与我中等强度相符	d.与我非常相符	a.一点也不相符	是	是	是	是	是	是	是	是	是	是	是	是	否	是	是	极不符合	极不符合	符合	不符合	符合	符合	极不符合
257	2024/7/5 20:57:17	389秒	微信	N/A	70	女	27-29	硕士在读	B.小强度的不太紧张的运动（如消遣娱乐性的打排球、乒乓球、慢跑、打太极拳等）	B.11至20分钟	C.一个月2至3次	A.散步、跑步┋D.球类┋H.游泳	b.与我有一点相符	a.一点也不相符	e.与我极其相符	a.一点也不相符	a.一点也不相符	e.与我极其相符	d.与我非常相符	b.与我有一点相符	a.一点也不相符	e.与我极其相符	d.与我非常相符	c.与我中等强度相符	e.与我极其相符	a.一点也不相符	c.与我中等强度相符	是	是	否	否	否	是	否	是	是	是	是	否	是	是	是	不符合	不确定	不确定	极不符合	不符合	不确定	极不符合
258	2024/7/5 20:57:18	537秒	微信	N/A	59	男	18-20	专科在读	D.呼吸急促、出汗很多的大强度的，但不持久的运动（如打羽毛球、篮球、网球、足球等）	B.11至20分钟	E.每周1到2次	A.散步、跑步┋F.太极拳、养生术┋H.游泳	a.一点也不相符	b.与我有一点相符	e.与我极其相符	a.一点也不相符	a.一点也不相符	d.与我非常相符	a.一点也不相符	c.与我中等强度相符	b.与我有一点相符	c.与我中等强度相符	b.与我有一点相符	b.与我有一点相符	a.一点也不相符	a.一点也不相符	e.与我极其相符	否	是	是	否	否	是	是	否	是	是	否	否	否	否	否	不符合	极不符合	极不符合	极不符合	极不符合	符合	极不符合
259	2024/7/5 20:57:24	475秒	微信	N/A	77	女	18-20	本科在读	A.轻微运动（如散步、做广播体操、打门球等）	C.21至30分钟	B.每周3至5次	B.旅游、郊游┋E.跳绳	a.一点也不相符	e.与我极其相符	e.与我极其相符	c.与我中等强度相符	b.与我有一点相符	c.与我中等强度相符	a.一点也不相符	b.与我有一点相符	e.与我极其相符	d.与我非常相符	b.与我有一点相符	b.与我有一点相符	a.一点也不相符	d.与我非常相符	d.与我非常相符	是	是	是	否	是	是	是	是	是	是	否	是	是	是	是	不符合	极不符合	不符合	不符合	极不符合	不确定	不确定
260	2024/7/5 20:57:31	501秒	微信	N/A	72	男	18-20	本科在读	B.小强度的不太紧张的运动（如消遣娱乐性的打排球、乒乓球、慢跑、打太极拳等）	A.10分钟以下	C.一个月2至3次	A.散步、跑步┋B.旅游、郊游┋E.跳绳	a.一点也不相符	b.与我有一点相符	c.与我中等强度相符	e.与我极其相符	a.一点也不相符	d.与我非常相符	b.与我有一点相符	b.与我有一点相符	a.一点也不相符	c.与我中等强度相符	a.一点也不相符	c.与我中等强度相符	e.与我极其相符	b.与我有一点相符	e.与我极其相符	是	是	否	否	是	是	是	否	否	是	是	是	是	是	是	不确定	不确定	极不符合	不确定	不确定	极不符合	极不符合
261	2024/7/5 20:57:34	503秒	微信	N/A	127	女	24-26	硕士在读	B.小强度的不太紧张的运动（如消遣娱乐性的打排球、乒乓球、慢跑、打太极拳等）	C.21至30分钟	A.一个月1次以下	D.球类┋E.跳绳┋H.游泳	d.与我非常相符	e.与我极其相符	a.一点也不相符	e.与我极其相符	e.与我极其相符	b.与我有一点相符	c.与我中等强度相符	d.与我非常相符	d.与我非常相符	c.与我中等强度相符	d.与我非常相符	e.与我极其相符	d.与我非常相符	e.与我极其相符	a.一点也不相符	是	否	是	是	是	是	否	是	是	是	是	是	是	否	否	极符合	极符合	极符合	符合	极符合	符合	符合
262	2024/7/5 20:57:39	482秒	微信	N/A	79	男	18-20	专科在读	D.呼吸急促、出汗很多的大强度的，但不持久的运动（如打羽毛球、篮球、网球、足球等）	D.31至59分钟	B.每周3至5次	A.散步、跑步┋D.球类	b.与我有一点相符	c.与我中等强度相符	a.一点也不相符	c.与我中等强度相符	b.与我有一点相符	e.与我极其相符	c.与我中等强度相符	c.与我中等强度相符	c.与我中等强度相符	e.与我极其相符	c.与我中等强度相符	b.与我有一点相符	c.与我中等强度相符	c.与我中等强度相符	d.与我非常相符	否	否	否	否	是	否	是	是	是	是	否	是	否	是	否	极不符合	极符合	不确定	极不符合	极不符合	不确定	不确定
263	2024/7/5 20:57:39	426秒	微信	N/A	132	女	24-26	硕士在读	D.呼吸急促、出汗很多的大强度的，但不持久的运动（如打羽毛球、篮球、网球、足球等）	D.31至59分钟	C.一个月2至3次	C.体育舞蹈┋G.健身器活动	e.与我极其相符	e.与我极其相符	b.与我有一点相符	e.与我极其相符	e.与我极其相符	a.一点也不相符	c.与我中等强度相符	d.与我非常相符	d.与我非常相符	a.一点也不相符	e.与我极其相符	c.与我中等强度相符	e.与我极其相符	d.与我非常相符	b.与我有一点相符	否	是	是	是	否	否	是	是	是	是	否	是	是	是	否	极符合	极符合	符合	符合	符合	符合	极符合
264	2024/7/5 20:57:45	408秒	微信	N/A	73	男	21-23	专科在读	B.小强度的不太紧张的运动（如消遣娱乐性的打排球、乒乓球、慢跑、打太极拳等）	B.11至20分钟	A.一个月1次以下	F.太极拳、养生术┋I.其他	e.与我极其相符	a.一点也不相符	e.与我极其相符	e.与我极其相符	d.与我非常相符	d.与我非常相符	c.与我中等强度相符	b.与我有一点相符	a.一点也不相符	d.与我非常相符	a.一点也不相符	b.与我有一点相符	c.与我中等强度相符	b.与我有一点相符	e.与我极其相符	是	是	是	否	是	否	否	是	是	是	是	否	是	是	否	不确定	极不符合	不符合	不确定	符合	极不符合	符合
265	2024/7/5 20:57:48	514秒	微信	N/A	121	女	24-26	硕士在读	B.小强度的不太紧张的运动（如消遣娱乐性的打排球、乒乓球、慢跑、打太极拳等）	C.21至30分钟	D.大约每天1次	B.旅游、郊游┋E.跳绳	e.与我极其相符	d.与我非常相符	c.与我中等强度相符	e.与我极其相符	e.与我极其相符	b.与我有一点相符	d.与我非常相符	c.与我中等强度相符	e.与我极其相符	c.与我中等强度相符	e.与我极其相符	d.与我非常相符	d.与我非常相符	d.与我非常相符	b.与我有一点相符	否	是	是	是	是	是	是	是	是	否	是	是	否	是	否	极符合	符合	符合	不确定	符合	符合	不确定
266	2024/7/5 20:57:53	496秒	微信	N/A	126	男	18-20	本科在读	B.小强度的不太紧张的运动（如消遣娱乐性的打排球、乒乓球、慢跑、打太极拳等）	B.11至20分钟	C.一个月2至3次	C.体育舞蹈┋G.健身器活动	d.与我非常相符	d.与我非常相符	b.与我有一点相符	e.与我极其相符	d.与我非常相符	a.一点也不相符	d.与我非常相符	d.与我非常相符	c.与我中等强度相符	b.与我有一点相符	e.与我极其相符	e.与我极其相符	d.与我非常相符	d.与我非常相符	b.与我有一点相符	是	是	是	否	是	是	否	是	否	否	是	是	是	否	是	极符合	符合	极符合	符合	极符合	极符合	符合
267	2024/7/5 20:57:53	471秒	微信	N/A	125	女	27-29	博士在读	A.轻微运动（如散步、做广播体操、打门球等）	B.11至20分钟	A.一个月1次以下	B.旅游、郊游┋G.健身器活动┋H.游泳	e.与我极其相符	d.与我非常相符	b.与我有一点相符	c.与我中等强度相符	e.与我极其相符	a.一点也不相符	d.与我非常相符	d.与我非常相符	d.与我非常相符	a.一点也不相符	d.与我非常相符	e.与我极其相符	d.与我非常相符	d.与我非常相符	a.一点也不相符	是	是	否	否	是	是	是	是	是	否	是	是	是	是	是	极符合	符合	符合	不确定	极符合	符合	极符合
268	2024/7/5 20:57:58	552秒	微信	N/A	129	女	18-20	本科在读	B.小强度的不太紧张的运动（如消遣娱乐性的打排球、乒乓球、慢跑、打太极拳等）	D.31至59分钟	B.每周3至5次	A.散步、跑步┋E.跳绳	e.与我极其相符	d.与我非常相符	b.与我有一点相符	e.与我极其相符	e.与我极其相符	b.与我有一点相符	e.与我极其相符	d.与我非常相符	e.与我极其相符	a.一点也不相符	c.与我中等强度相符	e.与我极其相符	d.与我非常相符	e.与我极其相符	a.一点也不相符	是	是	否	否	否	否	否	是	是	是	是	是	是	是	是	符合	极符合	符合	符合	不确定	符合	极符合
269	2024/7/5 20:58:05	419秒	微信	N/A	127	男	18-20	本科在读	E.呼吸急促，出汗很多的大强度的持久的运动（如赛跑、成套健美操练习、游泳等）	A.10分钟以下	C.一个月2至3次	D.球类┋E.跳绳	e.与我极其相符	e.与我极其相符	c.与我中等强度相符	d.与我非常相符	e.与我极其相符	c.与我中等强度相符	c.与我中等强度相符	d.与我非常相符	e.与我极其相符	b.与我有一点相符	e.与我极其相符	d.与我非常相符	d.与我非常相符	e.与我极其相符	a.一点也不相符	是	否	否	否	否	是	否	是	是	是	是	否	是	是	是	符合	极符合	不确定	极符合	极符合	符合	极符合
270	2024/7/5 20:58:10	488秒	微信	N/A	127	男	24-26	硕士在读	B.小强度的不太紧张的运动（如消遣娱乐性的打排球、乒乓球、慢跑、打太极拳等）	E.60分钟以上	A.一个月1次以下	A.散步、跑步┋C.体育舞蹈┋E.跳绳	d.与我非常相符	e.与我极其相符	b.与我有一点相符	d.与我非常相符	d.与我非常相符	a.一点也不相符	e.与我极其相符	d.与我非常相符	d.与我非常相符	c.与我中等强度相符	e.与我极其相符	e.与我极其相符	e.与我极其相符	e.与我极其相符	b.与我有一点相符	是	是	是	否	是	是	是	是	是	是	否	是	是	是	是	极符合	不确定	极符合	极符合	符合	符合	不确定
271	2024/7/5 20:58:16	521秒	微信	N/A	131	男	21-23	本科在读	B.小强度的不太紧张的运动（如消遣娱乐性的打排球、乒乓球、慢跑、打太极拳等）	C.21至30分钟	D.大约每天1次	A.散步、跑步┋F.太极拳、养生术	d.与我非常相符	e.与我极其相符	b.与我有一点相符	e.与我极其相符	e.与我极其相符	a.一点也不相符	e.与我极其相符	e.与我极其相符	d.与我非常相符	b.与我有一点相符	d.与我非常相符	e.与我极其相符	d.与我非常相符	e.与我极其相符	b.与我有一点相符	否	是	否	否	是	是	是	是	是	是	是	是	是	是	是	极符合	符合	符合	符合	极符合	符合	极符合
272	2024/7/5 20:58:18	511秒	微信	N/A	128	女	27-29	硕士在读	A.轻微运动（如散步、做广播体操、打门球等）	C.21至30分钟	B.每周3至5次	D.球类┋G.健身器活动┋H.游泳	e.与我极其相符	d.与我非常相符	a.一点也不相符	e.与我极其相符	e.与我极其相符	b.与我有一点相符	d.与我非常相符	d.与我非常相符	d.与我非常相符	a.一点也不相符	d.与我非常相符	e.与我极其相符	e.与我极其相符	c.与我中等强度相符	a.一点也不相符	是	否	否	否	是	是	是	是	是	是	是	是	是	是	是	极符合	极符合	符合	符合	不确定	极符合	极符合
273	2024/7/5 20:58:23	494秒	微信	N/A	131	男	24-26	硕士在读	E.呼吸急促，出汗很多的大强度的持久的运动（如赛跑、成套健美操练习、游泳等）	A.10分钟以下	D.大约每天1次	B.旅游、郊游┋E.跳绳┋F.太极拳、养生术	e.与我极其相符	c.与我中等强度相符	b.与我有一点相符	e.与我极其相符	c.与我中等强度相符	a.一点也不相符	c.与我中等强度相符	c.与我中等强度相符	e.与我极其相符	b.与我有一点相符	c.与我中等强度相符	e.与我极其相符	d.与我非常相符	d.与我非常相符	a.一点也不相符	是	是	否	是	是	是	是	是	是	是	是	是	是	是	是	极符合	符合	极符合	极符合	符合	符合	极符合
274	2024/7/5 20:58:24	550秒	微信	N/A	128	男	21-23	专科在读	A.轻微运动（如散步、做广播体操、打门球等）	B.11至20分钟	B.每周3至5次	B.旅游、郊游┋C.体育舞蹈┋E.跳绳	e.与我极其相符	d.与我非常相符	b.与我有一点相符	d.与我非常相符	e.与我极其相符	a.一点也不相符	d.与我非常相符	d.与我非常相符	e.与我极其相符	a.一点也不相符	d.与我非常相符	d.与我非常相符	d.与我非常相符	e.与我极其相符	a.一点也不相符	是	否	否	是	否	是	是	是	是	是	是	是	否	是	是	极符合	不确定	符合	符合	极符合	极符合	极符合
275	2024/7/5 20:58:31	555秒	微信	N/A	133	男	18-20	专科在读	B.小强度的不太紧张的运动（如消遣娱乐性的打排球、乒乓球、慢跑、打太极拳等）	C.21至30分钟	C.一个月2至3次	A.散步、跑步┋B.旅游、郊游	e.与我极其相符	c.与我中等强度相符	a.一点也不相符	d.与我非常相符	e.与我极其相符	b.与我有一点相符	e.与我极其相符	d.与我非常相符	c.与我中等强度相符	a.一点也不相符	e.与我极其相符	e.与我极其相符	d.与我非常相符	e.与我极其相符	a.一点也不相符	是	是	是	否	是	是	是	是	是	是	是	是	是	否	是	不确定	极符合	极符合	极符合	极符合	符合	极符合
276	2024/7/5 20:58:33	421秒	微信	N/A	129	女	24-26	硕士在读	A.轻微运动（如散步、做广播体操、打门球等）	B.11至20分钟	D.大约每天1次	C.体育舞蹈┋F.太极拳、养生术	e.与我极其相符	d.与我非常相符	b.与我有一点相符	d.与我非常相符	e.与我极其相符	c.与我中等强度相符	e.与我极其相符	d.与我非常相符	e.与我极其相符	c.与我中等强度相符	e.与我极其相符	e.与我极其相符	d.与我非常相符	e.与我极其相符	c.与我中等强度相符	是	是	是	是	是	是	是	否	是	是	否	是	是	是	是	符合	极符合	符合	不确定	极符合	极符合	符合
277	2024/7/5 20:58:37	466秒	微信	N/A	131	女	18-20	本科在读	C.中等强度较激烈持久的运动（如骑自行车跑步打乒乓球等）	B.11至20分钟	C.一个月2至3次	B.旅游、郊游┋E.跳绳	e.与我极其相符	e.与我极其相符	b.与我有一点相符	d.与我非常相符	e.与我极其相符	a.一点也不相符	c.与我中等强度相符	d.与我非常相符	d.与我非常相符	b.与我有一点相符	d.与我非常相符	e.与我极其相符	d.与我非常相符	d.与我非常相符	a.一点也不相符	否	是	是	否	是	否	是	是	是	是	是	是	否	是	是	极符合	符合	极符合	极符合	极符合	极符合	极符合
278	2024/7/5 20:58:39	517秒	微信	N/A	128	男	33及以上	硕士在读	C.中等强度较激烈持久的运动（如骑自行车跑步打乒乓球等）	E.60分钟以上	D.大约每天1次	B.旅游、郊游┋E.跳绳┋F.太极拳、养生术	e.与我极其相符	e.与我极其相符	b.与我有一点相符	e.与我极其相符	e.与我极其相符	a.一点也不相符	d.与我非常相符	d.与我非常相符	e.与我极其相符	c.与我中等强度相符	d.与我非常相符	e.与我极其相符	c.与我中等强度相符	d.与我非常相符	a.一点也不相符	否	否	否	否	是	是	是	是	是	否	是	否	是	是	是	符合	符合	极符合	符合	极符合	符合	符合
279	2024/7/5 20:58:46	500秒	微信	N/A	125	男	24-26	硕士在读	C.中等强度较激烈持久的运动（如骑自行车跑步打乒乓球等）	A.10分钟以下	C.一个月2至3次	B.旅游、郊游┋H.游泳	c.与我中等强度相符	c.与我中等强度相符	a.一点也不相符	e.与我极其相符	c.与我中等强度相符	a.一点也不相符	e.与我极其相符	d.与我非常相符	d.与我非常相符	b.与我有一点相符	e.与我极其相符	e.与我极其相符	d.与我非常相符	e.与我极其相符	c.与我中等强度相符	否	是	否	是	是	否	是	是	是	是	否	是	是	否	否	极符合	极符合	符合	符合	极符合	极符合	极符合
280	2024/7/5 20:58:47	523秒	微信	N/A	130	女	21-23	专科在读	B.小强度的不太紧张的运动（如消遣娱乐性的打排球、乒乓球、慢跑、打太极拳等）	E.60分钟以上	E.每周1到2次	D.球类┋G.健身器活动	d.与我非常相符	d.与我非常相符	a.一点也不相符	d.与我非常相符	e.与我极其相符	a.一点也不相符	c.与我中等强度相符	d.与我非常相符	e.与我极其相符	b.与我有一点相符	e.与我极其相符	d.与我非常相符	e.与我极其相符	d.与我非常相符	b.与我有一点相符	是	是	是	否	是	是	否	是	是	是	否	是	是	是	是	符合	不确定	不确定	不确定	符合	极符合	极符合
281	2024/7/5 20:58:52	537秒	微信	N/A	126	女	27-29	硕士在读	C.中等强度较激烈持久的运动（如骑自行车跑步打乒乓球等）	C.21至30分钟	C.一个月2至3次	A.散步、跑步┋B.旅游、郊游┋G.健身器活动	d.与我非常相符	d.与我非常相符	a.一点也不相符	d.与我非常相符	d.与我非常相符	a.一点也不相符	e.与我极其相符	d.与我非常相符	e.与我极其相符	b.与我有一点相符	d.与我非常相符	d.与我非常相符	e.与我极其相符	c.与我中等强度相符	b.与我有一点相符	否	是	是	否	是	是	是	否	是	是	是	是	是	是	是	符合	符合	极符合	符合	不确定	不确定	不确定
282	2024/7/5 20:58:59	540秒	微信	N/A	128	女	18-20	本科在读	E.呼吸急促，出汗很多的大强度的持久的运动（如赛跑、成套健美操练习、游泳等）	D.31至59分钟	D.大约每天1次	A.散步、跑步┋F.太极拳、养生术┋H.游泳	e.与我极其相符	e.与我极其相符	b.与我有一点相符	d.与我非常相符	e.与我极其相符	b.与我有一点相符	d.与我非常相符	d.与我非常相符	c.与我中等强度相符	a.一点也不相符	c.与我中等强度相符	d.与我非常相符	d.与我非常相符	e.与我极其相符	a.一点也不相符	是	是	否	否	否	是	是	是	是	否	是	否	是	是	是	符合	符合	极符合	符合	极符合	符合	不确定
283	2024/7/5 20:59:01	520秒	微信	N/A	125	男	24-26	硕士在读	B.小强度的不太紧张的运动（如消遣娱乐性的打排球、乒乓球、慢跑、打太极拳等）	D.31至59分钟	A.一个月1次以下	A.散步、跑步┋B.旅游、郊游┋C.体育舞蹈	d.与我非常相符	e.与我极其相符	b.与我有一点相符	e.与我极其相符	c.与我中等强度相符	b.与我有一点相符	e.与我极其相符	d.与我非常相符	d.与我非常相符	c.与我中等强度相符	e.与我极其相符	d.与我非常相符	d.与我非常相符	e.与我极其相符	b.与我有一点相符	是	是	是	否	否	是	是	是	是	是	是	是	是	是	是	极符合	极符合	符合	符合	极符合	符合	符合
284	2024/7/5 20:59:11	393秒	微信	N/A	125	男	24-26	博士在读	B.小强度的不太紧张的运动（如消遣娱乐性的打排球、乒乓球、慢跑、打太极拳等）	D.31至59分钟	C.一个月2至3次	D.球类┋F.太极拳、养生术	d.与我非常相符	d.与我非常相符	b.与我有一点相符	c.与我中等强度相符	d.与我非常相符	a.一点也不相符	e.与我极其相符	e.与我极其相符	d.与我非常相符	c.与我中等强度相符	e.与我极其相符	d.与我非常相符	c.与我中等强度相符	e.与我极其相符	c.与我中等强度相符	否	是	否	是	否	是	是	否	是	是	是	是	是	是	否	极符合	符合	符合	符合	极符合	极符合	符合
285	2024/7/5 20:59:15	402秒	微信	N/A	129	女	21-23	专科在读	C.中等强度较激烈持久的运动（如骑自行车跑步打乒乓球等）	D.31至59分钟	C.一个月2至3次	A.散步、跑步┋B.旅游、郊游┋C.体育舞蹈	d.与我非常相符	e.与我极其相符	b.与我有一点相符	d.与我非常相符	e.与我极其相符	a.一点也不相符	e.与我极其相符	c.与我中等强度相符	e.与我极其相符	a.一点也不相符	e.与我极其相符	e.与我极其相符	d.与我非常相符	e.与我极其相符	a.一点也不相符	是	否	是	否	否	否	是	是	是	是	是	是	是	否	是	符合	不确定	符合	符合	极符合	符合	符合
286	2024/7/5 20:59:20	486秒	微信	N/A	127	女	30-32	硕士在读	C.中等强度较激烈持久的运动（如骑自行车跑步打乒乓球等）	C.21至30分钟	C.一个月2至3次	A.散步、跑步┋H.游泳	e.与我极其相符	e.与我极其相符	a.一点也不相符	e.与我极其相符	d.与我非常相符	a.一点也不相符	e.与我极其相符	d.与我非常相符	e.与我极其相符	b.与我有一点相符	d.与我非常相符	e.与我极其相符	d.与我非常相符	d.与我非常相符	b.与我有一点相符	否	是	是	否	否	否	是	否	是	是	是	是	否	是	是	符合	符合	符合	不确定	符合	符合	符合
287	2024/7/5 20:59:26	540秒	微信	N/A	121	女	18-20	本科在读	C.中等强度较激烈持久的运动（如骑自行车跑步打乒乓球等）	C.21至30分钟	D.大约每天1次	B.旅游、郊游┋D.球类┋H.游泳	e.与我极其相符	e.与我极其相符	b.与我有一点相符	d.与我非常相符	e.与我极其相符	b.与我有一点相符	c.与我中等强度相符	d.与我非常相符	e.与我极其相符	b.与我有一点相符	d.与我非常相符	d.与我非常相符	c.与我中等强度相符	d.与我非常相符	b.与我有一点相符	是	是	是	否	是	否	是	否	否	是	否	是	否	是	否	极符合	符合	符合	符合	符合	不确定	符合
288	2024/7/5 20:59:29	458秒	微信	N/A	135	男	24-26	硕士在读	C.中等强度较激烈持久的运动（如骑自行车跑步打乒乓球等）	C.21至30分钟	D.大约每天1次	A.散步、跑步┋H.游泳	d.与我非常相符	d.与我非常相符	a.一点也不相符	e.与我极其相符	e.与我极其相符	a.一点也不相符	e.与我极其相符	d.与我非常相符	d.与我非常相符	b.与我有一点相符	e.与我极其相符	e.与我极其相符	c.与我中等强度相符	d.与我非常相符	a.一点也不相符	是	是	是	否	否	是	是	是	是	否	否	是	是	是	否	极符合	符合	极符合	极符合	极符合	极符合	符合
289	2024/7/5 20:59:33	497秒	微信	N/A	129	女	21-23	本科在读	B.小强度的不太紧张的运动（如消遣娱乐性的打排球、乒乓球、慢跑、打太极拳等）	E.60分钟以上	E.每周1到2次	A.散步、跑步┋E.跳绳	e.与我极其相符	e.与我极其相符	a.一点也不相符	d.与我非常相符	d.与我非常相符	a.一点也不相符	d.与我非常相符	d.与我非常相符	d.与我非常相符	b.与我有一点相符	e.与我极其相符	e.与我极其相符	d.与我非常相符	e.与我极其相符	a.一点也不相符	是	是	否	是	是	是	是	否	是	否	是	是	是	是	是	不确定	符合	极符合	符合	符合	不确定	不确定
290	2024/7/5 20:59:37	437秒	微信	N/A	130	女	24-26	硕士在读	D.呼吸急促、出汗很多的大强度的，但不持久的运动（如打羽毛球、篮球、网球、足球等）	C.21至30分钟	B.每周3至5次	A.散步、跑步┋F.太极拳、养生术	c.与我中等强度相符	e.与我极其相符	b.与我有一点相符	e.与我极其相符	e.与我极其相符	a.一点也不相符	e.与我极其相符	d.与我非常相符	e.与我极其相符	b.与我有一点相符	e.与我极其相符	e.与我极其相符	d.与我非常相符	d.与我非常相符	a.一点也不相符	否	是	否	否	是	否	是	是	是	是	是	是	是	是	否	符合	符合	符合	极符合	符合	不确定	极符合
291	2024/7/5 20:59:39	506秒	微信	N/A	124	男	18-20	本科在读	B.小强度的不太紧张的运动（如消遣娱乐性的打排球、乒乓球、慢跑、打太极拳等）	D.31至59分钟	C.一个月2至3次	F.太极拳、养生术┋H.游泳┋I.其他	e.与我极其相符	c.与我中等强度相符	b.与我有一点相符	e.与我极其相符	e.与我极其相符	c.与我中等强度相符	e.与我极其相符	e.与我极其相符	c.与我中等强度相符	b.与我有一点相符	d.与我非常相符	d.与我非常相符	d.与我非常相符	c.与我中等强度相符	a.一点也不相符	是	是	是	是	否	是	否	是	是	是	否	是	否	是	是	不确定	极符合	极符合	符合	极符合	符合	符合
292	2024/7/5 20:59:45	539秒	微信	N/A	130	女	21-23	本科在读	C.中等强度较激烈持久的运动（如骑自行车跑步打乒乓球等）	C.21至30分钟	C.一个月2至3次	B.旅游、郊游┋H.游泳	e.与我极其相符	c.与我中等强度相符	b.与我有一点相符	e.与我极其相符	e.与我极其相符	a.一点也不相符	e.与我极其相符	d.与我非常相符	e.与我极其相符	a.一点也不相符	e.与我极其相符	d.与我非常相符	d.与我非常相符	d.与我非常相符	b.与我有一点相符	是	是	否	否	否	是	是	是	否	是	否	是	是	否	是	极符合	符合	极符合	符合	极符合	极符合	不确定
293	2024/7/5 20:59:47	524秒	微信	N/A	132	男	27-29	硕士在读	D.呼吸急促、出汗很多的大强度的，但不持久的运动（如打羽毛球、篮球、网球、足球等）	A.10分钟以下	C.一个月2至3次	B.旅游、郊游┋C.体育舞蹈┋G.健身器活动	e.与我极其相符	d.与我非常相符	b.与我有一点相符	d.与我非常相符	e.与我极其相符	a.一点也不相符	e.与我极其相符	d.与我非常相符	e.与我极其相符	a.一点也不相符	e.与我极其相符	e.与我极其相符	e.与我极其相符	e.与我极其相符	b.与我有一点相符	否	是	否	否	是	是	是	是	是	是	是	是	是	是	否	符合	符合	极符合	极符合	符合	极符合	极符合
294	2024/7/5 20:59:53	495秒	微信	N/A	130	男	24-26	硕士在读	B.小强度的不太紧张的运动（如消遣娱乐性的打排球、乒乓球、慢跑、打太极拳等）	B.11至20分钟	C.一个月2至3次	A.散步、跑步┋D.球类┋E.跳绳	e.与我极其相符	d.与我非常相符	b.与我有一点相符	c.与我中等强度相符	e.与我极其相符	a.一点也不相符	e.与我极其相符	d.与我非常相符	d.与我非常相符	b.与我有一点相符	e.与我极其相符	d.与我非常相符	d.与我非常相符	e.与我极其相符	a.一点也不相符	是	是	是	否	否	是	否	是	是	是	是	是	是	否	是	极符合	符合	符合	极符合	符合	极符合	极符合
295	2024/7/5 20:59:54	442秒	微信	N/A	129	男	18-20	本科在读	D.呼吸急促、出汗很多的大强度的，但不持久的运动（如打羽毛球、篮球、网球、足球等）	C.21至30分钟	D.大约每天1次	A.散步、跑步┋B.旅游、郊游┋C.体育舞蹈	d.与我非常相符	e.与我极其相符	b.与我有一点相符	d.与我非常相符	e.与我极其相符	b.与我有一点相符	d.与我非常相符	d.与我非常相符	e.与我极其相符	a.一点也不相符	d.与我非常相符	d.与我非常相符	e.与我极其相符	e.与我极其相符	a.一点也不相符	是	是	是	否	是	是	否	是	是	是	否	否	是	否	是	符合	不确定	极符合	符合	极符合	符合	不确定
296	2024/7/5 21:00:01	453秒	微信	N/A	122	男	27-29	硕士在读	B.小强度的不太紧张的运动（如消遣娱乐性的打排球、乒乓球、慢跑、打太极拳等）	D.31至59分钟	D.大约每天1次	C.体育舞蹈┋D.球类	e.与我极其相符	c.与我中等强度相符	c.与我中等强度相符	e.与我极其相符	c.与我中等强度相符	c.与我中等强度相符	d.与我非常相符	d.与我非常相符	c.与我中等强度相符	b.与我有一点相符	d.与我非常相符	e.与我极其相符	e.与我极其相符	c.与我中等强度相符	a.一点也不相符	是	是	是	否	是	否	否	否	是	是	是	否	是	是	是	符合	极符合	符合	符合	极符合	符合	极符合
297	2024/7/5 21:00:05	443秒	微信	N/A	129	女	18-20	本科在读	C.中等强度较激烈持久的运动（如骑自行车跑步打乒乓球等）	D.31至59分钟	C.一个月2至3次	D.球类┋I.其他	e.与我极其相符	d.与我非常相符	b.与我有一点相符	d.与我非常相符	c.与我中等强度相符	a.一点也不相符	e.与我极其相符	d.与我非常相符	d.与我非常相符	c.与我中等强度相符	d.与我非常相符	e.与我极其相符	e.与我极其相符	e.与我极其相符	a.一点也不相符	是	否	否	是	是	否	是	是	是	否	是	是	是	否	是	符合	符合	极符合	符合	符合	极符合	符合
298	2024/7/5 21:00:20	549秒	微信	N/A	128	男	18-20	专科在读	C.中等强度较激烈持久的运动（如骑自行车跑步打乒乓球等）	D.31至59分钟	B.每周3至5次	B.旅游、郊游┋D.球类	d.与我非常相符	e.与我极其相符	b.与我有一点相符	c.与我中等强度相符	e.与我极其相符	b.与我有一点相符	e.与我极其相符	d.与我非常相符	e.与我极其相符	a.一点也不相符	c.与我中等强度相符	e.与我极其相符	d.与我非常相符	d.与我非常相符	b.与我有一点相符	是	是	否	是	是	否	否	是	是	否	是	是	是	是	否	极符合	极符合	符合	极符合	极符合	符合	符合
299	2024/7/5 21:00:30	455秒	微信	N/A	130	女	21-23	专科在读	B.小强度的不太紧张的运动（如消遣娱乐性的打排球、乒乓球、慢跑、打太极拳等）	C.21至30分钟	B.每周3至5次	A.散步、跑步┋F.太极拳、养生术	e.与我极其相符	d.与我非常相符	b.与我有一点相符	d.与我非常相符	e.与我极其相符	a.一点也不相符	e.与我极其相符	d.与我非常相符	e.与我极其相符	a.一点也不相符	d.与我非常相符	d.与我非常相符	e.与我极其相符	e.与我极其相符	a.一点也不相符	是	是	否	是	是	是	是	是	是	否	是	否	是	是	是	符合	极符合	极符合	极符合	符合	极符合	极符合
300	2024/7/5 21:00:38	475秒	微信	N/A	125	女	21-23	本科在读	D.呼吸急促、出汗很多的大强度的，但不持久的运动（如打羽毛球、篮球、网球、足球等）	B.11至20分钟	B.每周3至5次	B.旅游、郊游┋D.球类	e.与我极其相符	e.与我极其相符	a.一点也不相符	c.与我中等强度相符	e.与我极其相符	c.与我中等强度相符	c.与我中等强度相符	d.与我非常相符	d.与我非常相符	b.与我有一点相符	e.与我极其相符	d.与我非常相符	e.与我极其相符	c.与我中等强度相符	c.与我中等强度相符	是	是	是	否	是	否	否	是	是	是	是	是	是	是	是	符合	极符合	符合	极符合	极符合	符合	符合
301	2024/7/5 21:00:44	443秒	微信	N/A	120	女	18-20	本科在读	A.轻微运动（如散步、做广播体操、打门球等）	C.21至30分钟	C.一个月2至3次	A.散步、跑步┋G.健身器活动	d.与我非常相符	d.与我非常相符	b.与我有一点相符	c.与我中等强度相符	d.与我非常相符	a.一点也不相符	d.与我非常相符	d.与我非常相符	d.与我非常相符	b.与我有一点相符	c.与我中等强度相符	d.与我非常相符	e.与我极其相符	e.与我极其相符	b.与我有一点相符	是	是	是	是	否	是	是	否	是	否	是	否	是	是	是	符合	不确定	符合	符合	极符合	符合	不确定
302	2024/7/5 21:01:00	520秒	微信	N/A	122	男	21-23	本科在读	C.中等强度较激烈持久的运动（如骑自行车跑步打乒乓球等）	B.11至20分钟	A.一个月1次以下	A.散步、跑步┋E.跳绳┋F.太极拳、养生术	c.与我中等强度相符	e.与我极其相符	a.一点也不相符	d.与我非常相符	d.与我非常相符	a.一点也不相符	d.与我非常相符	d.与我非常相符	e.与我极其相符	b.与我有一点相符	d.与我非常相符	e.与我极其相符	d.与我非常相符	e.与我极其相符	b.与我有一点相符	否	是	是	否	是	是	否	是	是	是	是	否	是	是	是	不确定	符合	符合	符合	符合	符合	极符合
303	2024/7/5 21:01:34	500秒	微信	N/A	118	男	18-20	本科在读	A.轻微运动（如散步、做广播体操、打门球等）	D.31至59分钟	C.一个月2至3次	B.旅游、郊游┋D.球类┋E.跳绳	e.与我极其相符	d.与我非常相符	b.与我有一点相符	d.与我非常相符	c.与我中等强度相符	a.一点也不相符	d.与我非常相符	d.与我非常相符	c.与我中等强度相符	a.一点也不相符	c.与我中等强度相符	e.与我极其相符	d.与我非常相符	c.与我中等强度相符	b.与我有一点相符	否	是	否	否	是	是	是	否	是	否	否	否	否	是	是	符合	符合	极符合	符合	符合	极符合	符合
304	2024/7/5 21:02:03	494秒	微信	N/A	126	男	21-23	专科在读	D.呼吸急促、出汗很多的大强度的，但不持久的运动（如打羽毛球、篮球、网球、足球等）	C.21至30分钟	E.每周1到2次	B.旅游、郊游┋C.体育舞蹈┋G.健身器活动	d.与我非常相符	d.与我非常相符	b.与我有一点相符	c.与我中等强度相符	e.与我极其相符	b.与我有一点相符	e.与我极其相符	d.与我非常相符	e.与我极其相符	b.与我有一点相符	d.与我非常相符	c.与我中等强度相符	d.与我非常相符	d.与我非常相符	b.与我有一点相符	否	是	是	否	是	是	是	是	否	否	否	是	是	是	是	极符合	不确定	极符合	符合	不确定	符合	符合
305	2024/7/5 21:02:08	509秒	微信	N/A	131	男	18-20	专科在读	B.小强度的不太紧张的运动（如消遣娱乐性的打排球、乒乓球、慢跑、打太极拳等）	C.21至30分钟	B.每周3至5次	D.球类┋H.游泳	d.与我非常相符	e.与我极其相符	a.一点也不相符	d.与我非常相符	c.与我中等强度相符	b.与我有一点相符	e.与我极其相符	d.与我非常相符	d.与我非常相符	b.与我有一点相符	e.与我极其相符	e.与我极其相符	e.与我极其相符	d.与我非常相符	b.与我有一点相符	否	否	是	是	是	是	是	是	是	否	是	是	是	是	是	符合	极符合	符合	极符合	极符合	极符合	极符合
306	2024/7/5 21:02:17	440秒	微信	N/A	121	男	18-20	专科在读	B.小强度的不太紧张的运动（如消遣娱乐性的打排球、乒乓球、慢跑、打太极拳等）	D.31至59分钟	B.每周3至5次	A.散步、跑步┋B.旅游、郊游┋H.游泳	d.与我非常相符	d.与我非常相符	c.与我中等强度相符	c.与我中等强度相符	c.与我中等强度相符	b.与我有一点相符	e.与我极其相符	e.与我极其相符	d.与我非常相符	c.与我中等强度相符	e.与我极其相符	e.与我极其相符	d.与我非常相符	e.与我极其相符	a.一点也不相符	是	否	是	否	是	是	是	否	是	是	否	是	否	是	否	符合	不确定	极符合	极符合	极符合	符合	不确定
307	2024/7/5 21:02:26	544秒	微信	N/A	129	男	18-20	专科在读	C.中等强度较激烈持久的运动（如骑自行车跑步打乒乓球等）	A.10分钟以下	B.每周3至5次	D.球类┋G.健身器活动	d.与我非常相符	e.与我极其相符	a.一点也不相符	e.与我极其相符	e.与我极其相符	b.与我有一点相符	d.与我非常相符	d.与我非常相符	e.与我极其相符	a.一点也不相符	e.与我极其相符	e.与我极其相符	e.与我极其相符	e.与我极其相符	b.与我有一点相符	否	否	是	是	是	是	否	是	是	是	是	是	是	否	是	极符合	符合	符合	符合	符合	极符合	不确定
308	2024/7/5 21:02:34	430秒	微信	N/A	127	男	18-20	专科在读	D.呼吸急促、出汗很多的大强度的，但不持久的运动（如打羽毛球、篮球、网球、足球等）	D.31至59分钟	B.每周3至5次	A.散步、跑步┋H.游泳	e.与我极其相符	e.与我极其相符	b.与我有一点相符	d.与我非常相符	c.与我中等强度相符	c.与我中等强度相符	c.与我中等强度相符	d.与我非常相符	d.与我非常相符	a.一点也不相符	e.与我极其相符	e.与我极其相符	c.与我中等强度相符	d.与我非常相符	a.一点也不相符	是	否	否	是	是	是	是	否	是	否	是	是	否	是	否	极符合	极符合	极符合	极符合	符合	极符合	极符合
309	2024/7/5 21:02:42	487秒	微信	N/A	120	男	21-23	专科在读	B.小强度的不太紧张的运动（如消遣娱乐性的打排球、乒乓球、慢跑、打太极拳等）	A.10分钟以下	A.一个月1次以下	B.旅游、郊游┋E.跳绳┋H.游泳	d.与我非常相符	d.与我非常相符	b.与我有一点相符	e.与我极其相符	c.与我中等强度相符	b.与我有一点相符	e.与我极其相符	d.与我非常相符	d.与我非常相符	c.与我中等强度相符	e.与我极其相符	d.与我非常相符	d.与我非常相符	e.与我极其相符	b.与我有一点相符	是	是	否	否	是	是	是	是	是	是	是	是	是	是	是	符合	极符合	符合	极符合	不确定	符合	不确定
310	2024/7/5 21:02:49	429秒	微信	N/A	132	男	21-23	本科在读	D.呼吸急促、出汗很多的大强度的，但不持久的运动（如打羽毛球、篮球、网球、足球等）	E.60分钟以上	B.每周3至5次	A.散步、跑步┋C.体育舞蹈	c.与我中等强度相符	e.与我极其相符	b.与我有一点相符	c.与我中等强度相符	d.与我非常相符	a.一点也不相符	e.与我极其相符	d.与我非常相符	d.与我非常相符	b.与我有一点相符	e.与我极其相符	e.与我极其相符	c.与我中等强度相符	e.与我极其相符	a.一点也不相符	是	否	是	是	是	是	是	是	是	是	否	是	否	是	是	符合	符合	极符合	符合	符合	符合	极符合
311	2024/7/5 21:02:58	466秒	微信	N/A	119	女	18-20	专科在读	C.中等强度较激烈持久的运动（如骑自行车跑步打乒乓球等）	B.11至20分钟	B.每周3至5次	B.旅游、郊游┋H.游泳	e.与我极其相符	d.与我非常相符	b.与我有一点相符	d.与我非常相符	d.与我非常相符	c.与我中等强度相符	c.与我中等强度相符	d.与我非常相符	d.与我非常相符	a.一点也不相符	d.与我非常相符	e.与我极其相符	e.与我极其相符	e.与我极其相符	a.一点也不相符	是	是	否	否	否	否	否	是	是	是	否	是	是	是	是	符合	不确定	极符合	符合	符合	符合	符合
312	2024/7/5 21:03:19	438秒	微信	N/A	125	男	18-20	专科在读	B.小强度的不太紧张的运动（如消遣娱乐性的打排球、乒乓球、慢跑、打太极拳等）	B.11至20分钟	B.每周3至5次	A.散步、跑步┋D.球类┋G.健身器活动	d.与我非常相符	d.与我非常相符	b.与我有一点相符	d.与我非常相符	e.与我极其相符	a.一点也不相符	d.与我非常相符	c.与我中等强度相符	e.与我极其相符	b.与我有一点相符	e.与我极其相符	e.与我极其相符	d.与我非常相符	d.与我非常相符	a.一点也不相符	否	否	是	是	否	是	否	否	是	否	是	是	否	否	否	极符合	极符合	极符合	符合	符合	极符合	极符合
313	2024/7/5 21:03:30	514秒	微信	N/A	124	男	21-23	本科在读	B.小强度的不太紧张的运动（如消遣娱乐性的打排球、乒乓球、慢跑、打太极拳等）	D.31至59分钟	B.每周3至5次	B.旅游、郊游┋E.跳绳	e.与我极其相符	e.与我极其相符	b.与我有一点相符	d.与我非常相符	e.与我极其相符	b.与我有一点相符	e.与我极其相符	c.与我中等强度相符	e.与我极其相符	b.与我有一点相符	c.与我中等强度相符	e.与我极其相符	d.与我非常相符	e.与我极其相符	c.与我中等强度相符	是	否	是	是	否	是	是	是	是	否	是	是	是	否	是	符合	符合	符合	符合	不确定	极符合	符合
314	2024/7/5 21:03:43	418秒	微信	N/A	123	男	18-20	专科在读	C.中等强度较激烈持久的运动（如骑自行车跑步打乒乓球等）	B.11至20分钟	C.一个月2至3次	A.散步、跑步┋B.旅游、郊游┋H.游泳	c.与我中等强度相符	e.与我极其相符	a.一点也不相符	d.与我非常相符	d.与我非常相符	b.与我有一点相符	e.与我极其相符	d.与我非常相符	d.与我非常相符	b.与我有一点相符	c.与我中等强度相符	d.与我非常相符	e.与我极其相符	d.与我非常相符	a.一点也不相符	是	是	是	否	否	是	是	否	是	否	是	否	是	是	是	符合	极符合	极符合	符合	符合	符合	符合
315	2024/7/5 21:03:59	412秒	微信	N/A	121	女	18-20	本科在读	B.小强度的不太紧张的运动（如消遣娱乐性的打排球、乒乓球、慢跑、打太极拳等）	A.10分钟以下	A.一个月1次以下	B.旅游、郊游┋C.体育舞蹈┋E.跳绳	c.与我中等强度相符	c.与我中等强度相符	a.一点也不相符	e.与我极其相符	d.与我非常相符	a.一点也不相符	e.与我极其相符	d.与我非常相符	e.与我极其相符	b.与我有一点相符	d.与我非常相符	e.与我极其相符	e.与我极其相符	e.与我极其相符	c.与我中等强度相符	否	是	否	是	是	是	否	是	是	是	是	是	是	否	是	符合	符合	符合	极符合	极符合	符合	符合
316	2024/7/5 21:04:10	481秒	微信	N/A	118	男	21-23	本科在读	A.轻微运动（如散步、做广播体操、打门球等）	B.11至20分钟	A.一个月1次以下	A.散步、跑步┋D.球类	e.与我极其相符	d.与我非常相符	a.一点也不相符	d.与我非常相符	d.与我非常相符	b.与我有一点相符	d.与我非常相符	d.与我非常相符	e.与我极其相符	b.与我有一点相符	d.与我非常相符	d.与我非常相符	e.与我极其相符	e.与我极其相符	b.与我有一点相符	是	否	否	是	是	否	是	否	是	是	否	是	否	是	否	极符合	符合	符合	极符合	符合	不确定	不确定
317	2024/7/5 21:04:18	505秒	微信	N/A	137	男	18-20	专科在读	D.呼吸急促、出汗很多的大强度的，但不持久的运动（如打羽毛球、篮球、网球、足球等）	E.60分钟以上	C.一个月2至3次	F.太极拳、养生术┋G.健身器活动	e.与我极其相符	e.与我极其相符	a.一点也不相符	d.与我非常相符	e.与我极其相符	a.一点也不相符	d.与我非常相符	d.与我非常相符	e.与我极其相符	a.一点也不相符	e.与我极其相符	e.与我极其相符	e.与我极其相符	e.与我极其相符	a.一点也不相符	否	是	是	是	是	否	是	是	是	是	是	是	是	是	是	符合	不确定	极符合	符合	符合	极符合	符合
318	2024/7/5 21:04:26	543秒	微信	N/A	126	女	21-23	本科在读	D.呼吸急促、出汗很多的大强度的，但不持久的运动（如打羽毛球、篮球、网球、足球等）	D.31至59分钟	B.每周3至5次	A.散步、跑步┋B.旅游、郊游┋C.体育舞蹈	c.与我中等强度相符	d.与我非常相符	a.一点也不相符	d.与我非常相符	d.与我非常相符	a.一点也不相符	d.与我非常相符	c.与我中等强度相符	e.与我极其相符	b.与我有一点相符	e.与我极其相符	d.与我非常相符	d.与我非常相符	e.与我极其相符	a.一点也不相符	是	是	是	是	否	否	是	是	是	是	是	是	是	是	是	符合	极符合	不确定	极符合	符合	不确定	符合
319	2024/7/5 21:04:35	399秒	微信	N/A	129	男	18-20	专科在读	B.小强度的不太紧张的运动（如消遣娱乐性的打排球、乒乓球、慢跑、打太极拳等）	D.31至59分钟	D.大约每天1次	B.旅游、郊游┋F.太极拳、养生术	e.与我极其相符	d.与我非常相符	b.与我有一点相符	d.与我非常相符	e.与我极其相符	a.一点也不相符	d.与我非常相符	d.与我非常相符	d.与我非常相符	b.与我有一点相符	e.与我极其相符	e.与我极其相符	e.与我极其相符	d.与我非常相符	b.与我有一点相符	是	是	是	否	是	否	是	是	是	否	是	是	是	否	否	符合	符合	不确定	符合	符合	极符合	极符合
320	2024/7/5 21:04:41	547秒	微信	N/A	128	女	18-20	专科在读	C.中等强度较激烈持久的运动（如骑自行车跑步打乒乓球等）	D.31至59分钟	B.每周3至5次	A.散步、跑步┋B.旅游、郊游┋E.跳绳	e.与我极其相符	e.与我极其相符	b.与我有一点相符	e.与我极其相符	c.与我中等强度相符	a.一点也不相符	d.与我非常相符	d.与我非常相符	d.与我非常相符	a.一点也不相符	e.与我极其相符	c.与我中等强度相符	c.与我中等强度相符	e.与我极其相符	a.一点也不相符	是	是	是	否	否	否	是	是	是	是	是	是	是	是	是	符合	符合	符合	符合	极符合	符合	符合
321	2024/7/5 21:04:47	512秒	微信	N/A	120	男	18-20	本科在读	B.小强度的不太紧张的运动（如消遣娱乐性的打排球、乒乓球、慢跑、打太极拳等）	C.21至30分钟	D.大约每天1次	B.旅游、郊游┋E.跳绳┋H.游泳	c.与我中等强度相符	d.与我非常相符	c.与我中等强度相符	d.与我非常相符	c.与我中等强度相符	c.与我中等强度相符	d.与我非常相符	e.与我极其相符	e.与我极其相符	a.一点也不相符	c.与我中等强度相符	e.与我极其相符	c.与我中等强度相符	d.与我非常相符	b.与我有一点相符	否	否	是	否	是	否	是	否	是	是	是	是	是	否	否	符合	极符合	极符合	符合	不确定	极符合	极符合
322	2024/7/5 21:04:56	477秒	微信	N/A	127	女	18-20	本科在读	D.呼吸急促、出汗很多的大强度的，但不持久的运动（如打羽毛球、篮球、网球、足球等）	B.11至20分钟	C.一个月2至3次	A.散步、跑步┋D.球类┋E.跳绳	e.与我极其相符	e.与我极其相符	b.与我有一点相符	d.与我非常相符	c.与我中等强度相符	a.一点也不相符	c.与我中等强度相符	d.与我非常相符	e.与我极其相符	a.一点也不相符	d.与我非常相符	e.与我极其相符	d.与我非常相符	e.与我极其相符	b.与我有一点相符	否	是	是	是	是	是	否	否	是	否	否	否	是	否	是	极符合	符合	符合	极符合	符合	符合	极符合
323	2024/7/5 21:05:04	505秒	微信	N/A	130	男	18-20	专科在读	B.小强度的不太紧张的运动（如消遣娱乐性的打排球、乒乓球、慢跑、打太极拳等）	C.21至30分钟	E.每周1到2次	A.散步、跑步┋D.球类┋H.游泳	e.与我极其相符	e.与我极其相符	a.一点也不相符	e.与我极其相符	d.与我非常相符	a.一点也不相符	d.与我非常相符	d.与我非常相符	d.与我非常相符	a.一点也不相符	d.与我非常相符	e.与我极其相符	e.与我极其相符	c.与我中等强度相符	b.与我有一点相符	是	是	是	是	是	是	是	否	是	否	是	是	是	是	否	极符合	符合	符合	不确定	符合	不确定	符合
324	2024/7/5 21:47:49	419秒	微信	N/A	79	男	21-23	本科在读	B.小强度的不太紧张的运动（如消遣娱乐性的打排球、乒乓球、慢跑、打太极拳等）	E.60分钟以上	A.一个月1次以下	A.散步、跑步┋E.跳绳	c.与我中等强度相符	b.与我有一点相符	d.与我非常相符	a.一点也不相符	b.与我有一点相符	e.与我极其相符	a.一点也不相符	c.与我中等强度相符	b.与我有一点相符	c.与我中等强度相符	d.与我非常相符	c.与我中等强度相符	c.与我中等强度相符	b.与我有一点相符	a.一点也不相符	否	是	否	否	是	是	是	是	是	是	否	是	是	是	否	极不符合	极不符合	不确定	极不符合	极不符合	不符合	极符合
325	2024/7/5 21:48:16	488秒	微信	N/A	75	男	21-23	本科在读	C.中等强度较激烈持久的运动（如骑自行车跑步打乒乓球等）	D.31至59分钟	C.一个月2至3次	B.旅游、郊游┋D.球类	a.一点也不相符	a.一点也不相符	c.与我中等强度相符	a.一点也不相符	a.一点也不相符	c.与我中等强度相符	d.与我非常相符	c.与我中等强度相符	a.一点也不相符	a.一点也不相符	a.一点也不相符	b.与我有一点相符	b.与我有一点相符	b.与我有一点相符	d.与我非常相符	是	是	是	否	否	是	否	否	是	否	是	否	是	否	是	极不符合	极不符合	极符合	极不符合	不符合	不确定	不确定
326	2024/7/5 21:48:27	407秒	微信	N/A	68	男	21-23	本科在读	A.轻微运动（如散步、做广播体操、打门球等）	A.10分钟以下	B.每周3至5次	A.散步、跑步┋E.跳绳	c.与我中等强度相符	a.一点也不相符	c.与我中等强度相符	b.与我有一点相符	c.与我中等强度相符	e.与我极其相符	d.与我非常相符	b.与我有一点相符	a.一点也不相符	d.与我非常相符	d.与我非常相符	b.与我有一点相符	a.一点也不相符	a.一点也不相符	e.与我极其相符	是	是	否	是	是	是	是	是	是	是	是	否	否	是	是	不确定	不符合	不符合	不符合	不符合	不符合	极不符合
327	2024/7/5 21:48:37	510秒	微信	N/A	72	女	24-26	本科在读	B.小强度的不太紧张的运动（如消遣娱乐性的打排球、乒乓球、慢跑、打太极拳等）	C.21至30分钟	C.一个月2至3次	A.散步、跑步┋D.球类	a.一点也不相符	a.一点也不相符	e.与我极其相符	b.与我有一点相符	a.一点也不相符	b.与我有一点相符	c.与我中等强度相符	c.与我中等强度相符	c.与我中等强度相符	a.一点也不相符	d.与我非常相符	a.一点也不相符	c.与我中等强度相符	b.与我有一点相符	c.与我中等强度相符	否	是	是	否	是	是	是	是	是	是	否	是	是	否	否	极不符合	不确定	极不符合	不确定	不确定	极不符合	极不符合
328	2024/7/5 21:49:23	508秒	微信	N/A	81	男	21-23	本科在读	A.轻微运动（如散步、做广播体操、打门球等）	D.31至59分钟	D.大约每天1次	A.散步、跑步┋E.跳绳	a.一点也不相符	b.与我有一点相符	c.与我中等强度相符	e.与我极其相符	d.与我非常相符	a.一点也不相符	b.与我有一点相符	c.与我中等强度相符	c.与我中等强度相符	c.与我中等强度相符	c.与我中等强度相符	c.与我中等强度相符	c.与我中等强度相符	c.与我中等强度相符	d.与我非常相符	是	否	否	否	是	是	是	否	是	否	是	否	是	否	是	不确定	不确定	极不符合	极不符合	不符合	符合	极不符合
329	2024/7/5 21:49:34	551秒	微信	N/A	70	女	21-23	本科在读	D.呼吸急促、出汗很多的大强度的，但不持久的运动（如打羽毛球、篮球、网球、足球等）	D.31至59分钟	A.一个月1次以下	A.散步、跑步┋H.游泳	d.与我非常相符	a.一点也不相符	e.与我极其相符	c.与我中等强度相符	a.一点也不相符	e.与我极其相符	c.与我中等强度相符	c.与我中等强度相符	d.与我非常相符	d.与我非常相符	d.与我非常相符	b.与我有一点相符	a.一点也不相符	b.与我有一点相符	e.与我极其相符	是	是	是	是	是	是	是	否	否	否	是	否	否	是	是	不确定	不符合	极不符合	不符合	极不符合	不符合	不符合
330	2024/7/5 21:49:42	489秒	微信	N/A	87	男	21-23	专科在读	E.呼吸急促，出汗很多的大强度的持久的运动（如赛跑、成套健美操练习、游泳等）	A.10分钟以下	D.大约每天1次	B.旅游、郊游┋H.游泳	d.与我非常相符	b.与我有一点相符	d.与我非常相符	b.与我有一点相符	c.与我中等强度相符	c.与我中等强度相符	d.与我非常相符	e.与我极其相符	c.与我中等强度相符	d.与我非常相符	a.一点也不相符	a.一点也不相符	a.一点也不相符	d.与我非常相符	e.与我极其相符	是	是	否	否	是	是	否	是	是	是	是	是	否	否	是	不符合	不确定	不确定	不符合	不符合	不符合	极符合
331	2024/7/5 21:49:52	431秒	微信	N/A	79	男	21-23	本科在读	E.呼吸急促，出汗很多的大强度的持久的运动（如赛跑、成套健美操练习、游泳等）	A.10分钟以下	D.大约每天1次	B.旅游、郊游┋D.球类┋F.太极拳、养生术	c.与我中等强度相符	c.与我中等强度相符	d.与我非常相符	c.与我中等强度相符	c.与我中等强度相符	d.与我非常相符	a.一点也不相符	a.一点也不相符	b.与我有一点相符	d.与我非常相符	a.一点也不相符	b.与我有一点相符	e.与我极其相符	a.一点也不相符	e.与我极其相符	是	是	是	是	是	是	是	是	是	是	否	是	是	是	是	极不符合	不确定	不确定	不确定	极不符合	不确定	不符合
332	2024/7/5 21:50:03	550秒	微信	N/A	73	男	24-26	本科在读	B.小强度的不太紧张的运动（如消遣娱乐性的打排球、乒乓球、慢跑、打太极拳等）	B.11至20分钟	B.每周3至5次	A.散步、跑步┋C.体育舞蹈┋D.球类	b.与我有一点相符	b.与我有一点相符	e.与我极其相符	b.与我有一点相符	b.与我有一点相符	e.与我极其相符	b.与我有一点相符	e.与我极其相符	b.与我有一点相符	a.一点也不相符	c.与我中等强度相符	d.与我非常相符	b.与我有一点相符	a.一点也不相符	e.与我极其相符	是	是	是	否	是	是	否	是	是	是	是	否	否	是	是	不符合	极不符合	不符合	极符合	极不符合	不符合	不确定
333	2024/7/5 21:50:10	472秒	微信	N/A	74	男	21-23	本科在读	D.呼吸急促、出汗很多的大强度的，但不持久的运动（如打羽毛球、篮球、网球、足球等）	B.11至20分钟	D.大约每天1次	A.散步、跑步┋B.旅游、郊游	c.与我中等强度相符	b.与我有一点相符	a.一点也不相符	a.一点也不相符	d.与我非常相符	d.与我非常相符	b.与我有一点相符	b.与我有一点相符	c.与我中等强度相符	c.与我中等强度相符	a.一点也不相符	c.与我中等强度相符	b.与我有一点相符	a.一点也不相符	d.与我非常相符	是	否	是	否	否	是	是	是	是	是	是	是	是	是	是	极不符合	不确定	极不符合	不确定	极不符合	极不符合	不确定
334	2024/7/5 21:50:33	455秒	微信	N/A	71	女	21-23	专科在读	C.中等强度较激烈持久的运动（如骑自行车跑步打乒乓球等）	A.10分钟以下	C.一个月2至3次	A.散步、跑步┋B.旅游、郊游┋G.健身器活动	e.与我极其相符	a.一点也不相符	c.与我中等强度相符	a.一点也不相符	c.与我中等强度相符	d.与我非常相符	c.与我中等强度相符	b.与我有一点相符	b.与我有一点相符	e.与我极其相符	b.与我有一点相符	b.与我有一点相符	a.一点也不相符	a.一点也不相符	c.与我中等强度相符	是	是	是	是	是	是	是	是	是	是	否	否	是	否	是	不确定	不符合	不符合	极不符合	不符合	不符合	不符合
335	2024/7/5 21:50:44	425秒	微信	N/A	70	男	24-26	本科在读	C.中等强度较激烈持久的运动（如骑自行车跑步打乒乓球等）	E.60分钟以上	C.一个月2至3次	A.散步、跑步┋C.体育舞蹈┋E.跳绳	c.与我中等强度相符	b.与我有一点相符	e.与我极其相符	c.与我中等强度相符	a.一点也不相符	d.与我非常相符	d.与我非常相符	c.与我中等强度相符	b.与我有一点相符	e.与我极其相符	b.与我有一点相符	a.一点也不相符	a.一点也不相符	b.与我有一点相符	d.与我非常相符	是	是	否	否	否	是	否	是	是	是	否	否	是	是	否	不符合	极不符合	不符合	极不符合	极不符合	不确定	符合
336	2024/7/5 21:50:55	509秒	微信	N/A	79	男	21-23	专科在读	B.小强度的不太紧张的运动（如消遣娱乐性的打排球、乒乓球、慢跑、打太极拳等）	E.60分钟以上	A.一个月1次以下	B.旅游、郊游┋D.球类┋I.其他	c.与我中等强度相符	a.一点也不相符	e.与我极其相符	e.与我极其相符	b.与我有一点相符	b.与我有一点相符	a.一点也不相符	e.与我极其相符	b.与我有一点相符	e.与我极其相符	a.一点也不相符	c.与我中等强度相符	a.一点也不相符	c.与我中等强度相符	e.与我极其相符	是	是	是	是	否	是	否	是	是	是	是	否	是	是	是	极不符合	极不符合	极符合	不确定	不符合	极不符合	不确定
337	2024/7/5 21:51:03	474秒	微信	N/A	80	男	21-23	本科在读	C.中等强度较激烈持久的运动（如骑自行车跑步打乒乓球等）	C.21至30分钟	D.大约每天1次	E.跳绳┋F.太极拳、养生术┋G.健身器活动	a.一点也不相符	e.与我极其相符	e.与我极其相符	a.一点也不相符	b.与我有一点相符	d.与我非常相符	e.与我极其相符	e.与我极其相符	e.与我极其相符	d.与我非常相符	d.与我非常相符	a.一点也不相符	b.与我有一点相符	a.一点也不相符	d.与我非常相符	是	是	是	是	否	是	否	是	否	是	是	是	是	是	是	极不符合	不符合	不确定	极不符合	不符合	不符合	不符合
338	2024/7/5 21:51:20	460秒	微信	N/A	75	男	21-23	本科在读	A.轻微运动（如散步、做广播体操、打门球等）	D.31至59分钟	B.每周3至5次	B.旅游、郊游┋E.跳绳	b.与我有一点相符	c.与我中等强度相符	e.与我极其相符	a.一点也不相符	b.与我有一点相符	d.与我非常相符	a.一点也不相符	e.与我极其相符	a.一点也不相符	e.与我极其相符	d.与我非常相符	b.与我有一点相符	c.与我中等强度相符	a.一点也不相符	c.与我中等强度相符	是	否	否	是	是	是	是	是	是	是	是	是	是	否	是	极符合	不确定	极不符合	极不符合	符合	不确定	极不符合
339	2024/7/5 21:51:31	504秒	微信	N/A	82	男	21-23	本科在读	B.小强度的不太紧张的运动（如消遣娱乐性的打排球、乒乓球、慢跑、打太极拳等）	D.31至59分钟	B.每周3至5次	B.旅游、郊游┋D.球类┋F.太极拳、养生术	a.一点也不相符	a.一点也不相符	c.与我中等强度相符	b.与我有一点相符	c.与我中等强度相符	d.与我非常相符	e.与我极其相符	e.与我极其相符	b.与我有一点相符	e.与我极其相符	a.一点也不相符	a.一点也不相符	b.与我有一点相符	a.一点也不相符	d.与我非常相符	是	是	否	是	是	否	否	否	否	是	是	是	是	是	是	不确定	不确定	不确定	极符合	符合	符合	极不符合
340	2024/7/5 21:51:38	508秒	微信	N/A	134	男	21-23	本科在读	C.中等强度较激烈持久的运动（如骑自行车跑步打乒乓球等）	D.31至59分钟	C.一个月2至3次	D.球类┋E.跳绳	e.与我极其相符	d.与我非常相符	c.与我中等强度相符	e.与我极其相符	e.与我极其相符	a.一点也不相符	e.与我极其相符	d.与我非常相符	d.与我非常相符	b.与我有一点相符	e.与我极其相符	c.与我中等强度相符	e.与我极其相符	e.与我极其相符	a.一点也不相符	是	是	否	是	否	是	是	是	是	是	否	是	是	是	是	极符合	符合	极符合	符合	不确定	极符合	极符合
341	2024/7/5 21:51:48	394秒	微信	N/A	126	女	21-23	本科在读	D.呼吸急促、出汗很多的大强度的，但不持久的运动（如打羽毛球、篮球、网球、足球等）	D.31至59分钟	C.一个月2至3次	B.旅游、郊游┋E.跳绳	d.与我非常相符	d.与我非常相符	c.与我中等强度相符	e.与我极其相符	d.与我非常相符	a.一点也不相符	c.与我中等强度相符	c.与我中等强度相符	c.与我中等强度相符	a.一点也不相符	e.与我极其相符	e.与我极其相符	c.与我中等强度相符	d.与我非常相符	b.与我有一点相符	是	否	是	否	是	是	否	否	是	否	是	是	是	是	是	符合	符合	极符合	极符合	极符合	符合	符合
342	2024/7/5 21:52:09	503秒	微信	N/A	130	男	21-23	本科在读	D.呼吸急促、出汗很多的大强度的，但不持久的运动（如打羽毛球、篮球、网球、足球等）	C.21至30分钟	D.大约每天1次	B.旅游、郊游┋F.太极拳、养生术	e.与我极其相符	e.与我极其相符	c.与我中等强度相符	e.与我极其相符	e.与我极其相符	a.一点也不相符	d.与我非常相符	d.与我非常相符	d.与我非常相符	a.一点也不相符	e.与我极其相符	d.与我非常相符	e.与我极其相符	d.与我非常相符	a.一点也不相符	否	否	是	否	否	是	否	是	是	是	是	否	是	否	是	极符合	不确定	符合	符合	极符合	极符合	符合
343	2024/7/5 21:52:45	455秒	微信	N/A	122	男	21-23	本科在读	A.轻微运动（如散步、做广播体操、打门球等）	C.21至30分钟	B.每周3至5次	A.散步、跑步┋B.旅游、郊游┋F.太极拳、养生术	e.与我极其相符	e.与我极其相符	a.一点也不相符	d.与我非常相符	d.与我非常相符	b.与我有一点相符	e.与我极其相符	c.与我中等强度相符	e.与我极其相符	a.一点也不相符	d.与我非常相符	d.与我非常相符	c.与我中等强度相符	e.与我极其相符	a.一点也不相符	是	否	否	否	否	是	否	否	是	是	是	是	是	否	是	极符合	极符合	符合	极符合	不确定	符合	符合
344	2024/7/5 21:52:49	436秒	微信	N/A	122	男	21-23	本科在读	A.轻微运动（如散步、做广播体操、打门球等）	C.21至30分钟	B.每周3至5次	A.散步、跑步┋B.旅游、郊游┋F.太极拳、养生术	e.与我极其相符	e.与我极其相符	a.一点也不相符	d.与我非常相符	d.与我非常相符	b.与我有一点相符	e.与我极其相符	c.与我中等强度相符	e.与我极其相符	a.一点也不相符	d.与我非常相符	d.与我非常相符	c.与我中等强度相符	e.与我极其相符	a.一点也不相符	是	否	否	否	否	是	否	否	是	是	是	是	是	否	是	极符合	极符合	符合	极符合	不确定	符合	符合
345	2024/7/5 21:53:00	389秒	微信	N/A	126	男	21-23	本科在读	D.呼吸急促、出汗很多的大强度的，但不持久的运动（如打羽毛球、篮球、网球、足球等）	C.21至30分钟	A.一个月1次以下	F.太极拳、养生术┋G.健身器活动┋I.其他	e.与我极其相符	e.与我极其相符	b.与我有一点相符	d.与我非常相符	d.与我非常相符	a.一点也不相符	d.与我非常相符	d.与我非常相符	d.与我非常相符	b.与我有一点相符	d.与我非常相符	e.与我极其相符	e.与我极其相符	e.与我极其相符	a.一点也不相符	否	是	是	否	否	是	是	否	是	是	否	是	是	否	是	符合	符合	符合	符合	符合	符合	符合
346	2024/7/5 21:53:17	449秒	微信	N/A	131	男	24-26	本科在读	C.中等强度较激烈持久的运动（如骑自行车跑步打乒乓球等）	D.31至59分钟	E.每周1到2次	D.球类┋E.跳绳	e.与我极其相符	d.与我非常相符	b.与我有一点相符	d.与我非常相符	d.与我非常相符	c.与我中等强度相符	d.与我非常相符	e.与我极其相符	d.与我非常相符	a.一点也不相符	c.与我中等强度相符	d.与我非常相符	e.与我极其相符	e.与我极其相符	a.一点也不相符	是	是	是	否	是	是	是	是	是	否	是	否	是	是	是	不确定	符合	极符合	符合	极符合	符合	符合
347	2024/7/5 21:53:27	546秒	微信	N/A	129	女	21-23	本科在读	C.中等强度较激烈持久的运动（如骑自行车跑步打乒乓球等）	E.60分钟以上	C.一个月2至3次	B.旅游、郊游┋D.球类┋E.跳绳	d.与我非常相符	d.与我非常相符	b.与我有一点相符	d.与我非常相符	e.与我极其相符	a.一点也不相符	e.与我极其相符	d.与我非常相符	d.与我非常相符	a.一点也不相符	e.与我极其相符	e.与我极其相符	d.与我非常相符	e.与我极其相符	b.与我有一点相符	是	是	否	否	是	否	是	否	否	是	否	是	是	是	是	极符合	符合	极符合	符合	极符合	符合	不确定
348	2024/7/5 21:53:36	429秒	微信	N/A	122	男	21-23	本科在读	B.小强度的不太紧张的运动（如消遣娱乐性的打排球、乒乓球、慢跑、打太极拳等）	E.60分钟以上	C.一个月2至3次	A.散步、跑步┋D.球类┋E.跳绳	d.与我非常相符	e.与我极其相符	b.与我有一点相符	e.与我极其相符	d.与我非常相符	c.与我中等强度相符	e.与我极其相符	c.与我中等强度相符	e.与我极其相符	a.一点也不相符	e.与我极其相符	d.与我非常相符	c.与我中等强度相符	c.与我中等强度相符	c.与我中等强度相符	是	是	是	否	是	是	是	否	是	是	是	否	是	是	是	符合	符合	不确定	符合	符合	符合	极符合
349	2024/7/5 21:53:48	476秒	微信	N/A	129	女	21-23	本科在读	C.中等强度较激烈持久的运动（如骑自行车跑步打乒乓球等）	D.31至59分钟	A.一个月1次以下	A.散步、跑步┋E.跳绳┋H.游泳	d.与我非常相符	d.与我非常相符	b.与我有一点相符	d.与我非常相符	e.与我极其相符	b.与我有一点相符	d.与我非常相符	e.与我极其相符	d.与我非常相符	a.一点也不相符	d.与我非常相符	d.与我非常相符	d.与我非常相符	e.与我极其相符	a.一点也不相符	是	是	是	是	是	是	否	是	是	是	是	否	是	是	是	符合	极符合	符合	极符合	符合	符合	符合
350	2024/7/5 21:54:01	486秒	微信	N/A	124	男	21-23	本科在读	D.呼吸急促、出汗很多的大强度的，但不持久的运动（如打羽毛球、篮球、网球、足球等）	A.10分钟以下	B.每周3至5次	B.旅游、郊游┋D.球类┋H.游泳	e.与我极其相符	e.与我极其相符	c.与我中等强度相符	e.与我极其相符	e.与我极其相符	c.与我中等强度相符	e.与我极其相符	d.与我非常相符	e.与我极其相符	a.一点也不相符	c.与我中等强度相符	d.与我非常相符	d.与我非常相符	e.与我极其相符	b.与我有一点相符	是	是	是	否	是	是	是	是	是	否	是	否	是	是	否	符合	符合	不确定	符合	符合	符合	不确定
351	2024/7/5 21:54:29	386秒	微信	N/A	117	女	21-23	本科在读	A.轻微运动（如散步、做广播体操、打门球等）	B.11至20分钟	B.每周3至5次	E.跳绳┋F.太极拳、养生术	c.与我中等强度相符	d.与我非常相符	b.与我有一点相符	d.与我非常相符	e.与我极其相符	b.与我有一点相符	d.与我非常相符	e.与我极其相符	e.与我极其相符	a.一点也不相符	d.与我非常相符	e.与我极其相符	d.与我非常相符	c.与我中等强度相符	b.与我有一点相符	是	是	否	否	否	否	是	是	是	是	否	是	否	否	是	符合	不确定	不确定	极符合	符合	极符合	符合
352	2024/7/5 21:54:39	431秒	微信	N/A	123	男	21-23	专科在读	B.小强度的不太紧张的运动（如消遣娱乐性的打排球、乒乓球、慢跑、打太极拳等）	B.11至20分钟	B.每周3至5次	B.旅游、郊游┋E.跳绳┋F.太极拳、养生术	d.与我非常相符	e.与我极其相符	c.与我中等强度相符	d.与我非常相符	d.与我非常相符	c.与我中等强度相符	d.与我非常相符	d.与我非常相符	e.与我极其相符	a.一点也不相符	c.与我中等强度相符	e.与我极其相符	d.与我非常相符	e.与我极其相符	a.一点也不相符	是	是	否	是	是	是	否	是	否	否	是	是	否	是	是	极符合	符合	符合	符合	极符合	不确定	极符合
353	2024/7/5 21:54:47	387秒	微信	N/A	126	女	24-26	本科在读	A.轻微运动（如散步、做广播体操、打门球等）	E.60分钟以上	B.每周3至5次	A.散步、跑步┋E.跳绳	e.与我极其相符	c.与我中等强度相符	b.与我有一点相符	d.与我非常相符	d.与我非常相符	a.一点也不相符	d.与我非常相符	d.与我非常相符	e.与我极其相符	b.与我有一点相符	d.与我非常相符	d.与我非常相符	e.与我极其相符	d.与我非常相符	b.与我有一点相符	是	否	是	否	是	是	是	否	否	是	否	否	是	是	是	极符合	极符合	符合	极符合	不确定	极符合	极符合
354	2024/7/5 21:54:57	427秒	微信	N/A	124	男	21-23	专科在读	B.小强度的不太紧张的运动（如消遣娱乐性的打排球、乒乓球、慢跑、打太极拳等）	E.60分钟以上	C.一个月2至3次	A.散步、跑步┋E.跳绳	d.与我非常相符	e.与我极其相符	b.与我有一点相符	d.与我非常相符	e.与我极其相符	b.与我有一点相符	d.与我非常相符	c.与我中等强度相符	c.与我中等强度相符	b.与我有一点相符	d.与我非常相符	d.与我非常相符	d.与我非常相符	e.与我极其相符	a.一点也不相符	否	是	否	否	否	是	否	是	是	是	是	是	是	是	是	符合	符合	极符合	不确定	不确定	极符合	极符合
355	2024/7/5 21:55:05	476秒	微信	N/A	124	女	21-23	本科在读	A.轻微运动（如散步、做广播体操、打门球等）	B.11至20分钟	D.大约每天1次	B.旅游、郊游┋I.其他	e.与我极其相符	d.与我非常相符	b.与我有一点相符	e.与我极其相符	e.与我极其相符	b.与我有一点相符	d.与我非常相符	d.与我非常相符	e.与我极其相符	c.与我中等强度相符	d.与我非常相符	e.与我极其相符	d.与我非常相符	d.与我非常相符	b.与我有一点相符	是	是	是	否	是	否	是	是	是	是	否	是	是	否	是	符合	符合	极符合	符合	不确定	极符合	极符合
356	2024/7/5 21:55:15	503秒	微信	N/A	121	男	21-23	本科在读	B.小强度的不太紧张的运动（如消遣娱乐性的打排球、乒乓球、慢跑、打太极拳等）	C.21至30分钟	A.一个月1次以下	A.散步、跑步┋D.球类	e.与我极其相符	e.与我极其相符	b.与我有一点相符	d.与我非常相符	e.与我极其相符	c.与我中等强度相符	d.与我非常相符	e.与我极其相符	e.与我极其相符	c.与我中等强度相符	d.与我非常相符	d.与我非常相符	d.与我非常相符	d.与我非常相符	b.与我有一点相符	是	是	是	否	是	是	是	是	是	否	是	是	是	否	是	不确定	符合	极符合	符合	极符合	不确定	极符合
357	2024/7/5 21:55:34	519秒	微信	N/A	134	女	24-26	本科在读	D.呼吸急促、出汗很多的大强度的，但不持久的运动（如打羽毛球、篮球、网球、足球等）	E.60分钟以上	C.一个月2至3次	D.球类┋G.健身器活动	e.与我极其相符	d.与我非常相符	b.与我有一点相符	d.与我非常相符	e.与我极其相符	a.一点也不相符	e.与我极其相符	d.与我非常相符	c.与我中等强度相符	b.与我有一点相符	e.与我极其相符	c.与我中等强度相符	e.与我极其相符	e.与我极其相符	a.一点也不相符	是	是	是	是	是	是	是	否	是	是	否	是	是	是	是	符合	符合	极符合	不确定	极符合	符合	极符合
358	2024/7/5 21:55:42	392秒	微信	N/A	123	女	21-23	专科在读	C.中等强度较激烈持久的运动（如骑自行车跑步打乒乓球等）	C.21至30分钟	B.每周3至5次	A.散步、跑步┋F.太极拳、养生术	d.与我非常相符	e.与我极其相符	c.与我中等强度相符	d.与我非常相符	c.与我中等强度相符	b.与我有一点相符	d.与我非常相符	e.与我极其相符	e.与我极其相符	a.一点也不相符	c.与我中等强度相符	e.与我极其相符	d.与我非常相符	c.与我中等强度相符	b.与我有一点相符	是	否	是	是	是	否	是	否	是	是	否	是	是	是	是	符合	极符合	极符合	不确定	符合	符合	极符合
359	2024/7/5 21:55:50	476秒	微信	N/A	124	女	21-23	本科在读	B.小强度的不太紧张的运动（如消遣娱乐性的打排球、乒乓球、慢跑、打太极拳等）	A.10分钟以下	A.一个月1次以下	A.散步、跑步┋B.旅游、郊游┋I.其他	d.与我非常相符	c.与我中等强度相符	b.与我有一点相符	c.与我中等强度相符	c.与我中等强度相符	b.与我有一点相符	d.与我非常相符	c.与我中等强度相符	e.与我极其相符	a.一点也不相符	e.与我极其相符	d.与我非常相符	d.与我非常相符	e.与我极其相符	a.一点也不相符	是	是	是	是	是	是	是	否	是	是	否	是	是	是	是	符合	极符合	符合	极符合	极符合	极符合	极符合
360	2024/7/5 21:56:00	386秒	微信	N/A	121	男	21-23	本科在读	D.呼吸急促、出汗很多的大强度的，但不持久的运动（如打羽毛球、篮球、网球、足球等）	C.21至30分钟	B.每周3至5次	A.散步、跑步┋D.球类	d.与我非常相符	e.与我极其相符	a.一点也不相符	d.与我非常相符	c.与我中等强度相符	b.与我有一点相符	e.与我极其相符	d.与我非常相符	c.与我中等强度相符	b.与我有一点相符	c.与我中等强度相符	e.与我极其相符	d.与我非常相符	c.与我中等强度相符	c.与我中等强度相符	否	是	是	否	是	是	是	是	否	是	否	否	是	是	是	符合	极符合	极符合	不确定	符合	极符合	极符合
361	2024/7/5 21:56:24	419秒	微信	N/A	127	女	21-23	本科在读	C.中等强度较激烈持久的运动（如骑自行车跑步打乒乓球等）	C.21至30分钟	C.一个月2至3次	A.散步、跑步┋C.体育舞蹈┋H.游泳	e.与我极其相符	e.与我极其相符	a.一点也不相符	d.与我非常相符	d.与我非常相符	b.与我有一点相符	e.与我极其相符	e.与我极其相符	c.与我中等强度相符	a.一点也不相符	d.与我非常相符	d.与我非常相符	e.与我极其相符	d.与我非常相符	b.与我有一点相符	是	否	是	否	是	是	否	否	是	是	是	是	否	是	是	极符合	符合	符合	符合	符合	极符合	不确定
362	2024/7/5 21:56:33	527秒	微信	N/A	124	男	21-23	本科在读	C.中等强度较激烈持久的运动（如骑自行车跑步打乒乓球等）	A.10分钟以下	E.每周1到2次	B.旅游、郊游┋C.体育舞蹈┋E.跳绳	e.与我极其相符	e.与我极其相符	a.一点也不相符	d.与我非常相符	e.与我极其相符	c.与我中等强度相符	e.与我极其相符	d.与我非常相符	c.与我中等强度相符	a.一点也不相符	d.与我非常相符	d.与我非常相符	c.与我中等强度相符	d.与我非常相符	b.与我有一点相符	是	否	是	否	否	是	是	是	是	是	是	是	是	是	否	极符合	符合	极符合	不确定	极符合	不确定	符合
363	2024/7/5 21:56:40	459秒	微信	N/A	132	男	21-23	本科在读	C.中等强度较激烈持久的运动（如骑自行车跑步打乒乓球等）	C.21至30分钟	A.一个月1次以下	B.旅游、郊游┋F.太极拳、养生术┋H.游泳	e.与我极其相符	e.与我极其相符	a.一点也不相符	e.与我极其相符	d.与我非常相符	a.一点也不相符	e.与我极其相符	e.与我极其相符	e.与我极其相符	b.与我有一点相符	e.与我极其相符	e.与我极其相符	d.与我非常相符	e.与我极其相符	a.一点也不相符	是	是	是	是	否	是	否	否	是	是	是	是	是	否	是	极符合	符合	符合	极符合	符合	不确定	符合
364	2024/7/5 21:56:51	550秒	微信	N/A	128	女	21-23	本科在读	D.呼吸急促、出汗很多的大强度的，但不持久的运动（如打羽毛球、篮球、网球、足球等）	C.21至30分钟	C.一个月2至3次	E.跳绳┋H.游泳	d.与我非常相符	d.与我非常相符	b.与我有一点相符	e.与我极其相符	e.与我极其相符	b.与我有一点相符	c.与我中等强度相符	c.与我中等强度相符	d.与我非常相符	a.一点也不相符	d.与我非常相符	e.与我极其相符	e.与我极其相符	c.与我中等强度相符	a.一点也不相符	否	是	否	是	是	是	否	是	是	是	是	是	是	是	是	符合	极符合	符合	不确定	极符合	符合	极符合
365	2024/7/5 21:57:08	461秒	微信	N/A	127	女	21-23	本科在读	C.中等强度较激烈持久的运动（如骑自行车跑步打乒乓球等）	D.31至59分钟	B.每周3至5次	B.旅游、郊游┋H.游泳	e.与我极其相符	e.与我极其相符	b.与我有一点相符	d.与我非常相符	e.与我极其相符	b.与我有一点相符	e.与我极其相符	d.与我非常相符	d.与我非常相符	b.与我有一点相符	d.与我非常相符	e.与我极其相符	d.与我非常相符	d.与我非常相符	a.一点也不相符	否	是	是	否	是	是	是	是	是	否	否	否	是	是	是	符合	不确定	符合	极符合	极符合	符合	不确定
366	2024/7/5 21:57:19	422秒	微信	N/A	129	女	21-23	本科在读	E.呼吸急促，出汗很多的大强度的持久的运动（如赛跑、成套健美操练习、游泳等）	C.21至30分钟	B.每周3至5次	A.散步、跑步┋B.旅游、郊游┋I.其他	d.与我非常相符	c.与我中等强度相符	a.一点也不相符	e.与我极其相符	d.与我非常相符	b.与我有一点相符	e.与我极其相符	d.与我非常相符	e.与我极其相符	b.与我有一点相符	d.与我非常相符	d.与我非常相符	d.与我非常相符	d.与我非常相符	b.与我有一点相符	否	否	是	是	否	是	否	是	是	是	是	否	是	是	是	极符合	极符合	极符合	符合	符合	极符合	极符合
367	2024/7/5 21:57:27	485秒	微信	N/A	130	女	21-23	本科在读	C.中等强度较激烈持久的运动（如骑自行车跑步打乒乓球等）	E.60分钟以上	A.一个月1次以下	B.旅游、郊游┋G.健身器活动┋H.游泳	d.与我非常相符	d.与我非常相符	c.与我中等强度相符	d.与我非常相符	d.与我非常相符	b.与我有一点相符	e.与我极其相符	e.与我极其相符	e.与我极其相符	c.与我中等强度相符	e.与我极其相符	e.与我极其相符	e.与我极其相符	d.与我非常相符	a.一点也不相符	是	是	是	否	否	是	是	是	是	否	是	是	是	是	是	极符合	极符合	不确定	符合	极符合	极符合	符合
368	2024/7/5 21:57:37	417秒	微信	N/A	131	女	21-23	本科在读	C.中等强度较激烈持久的运动（如骑自行车跑步打乒乓球等）	E.60分钟以上	D.大约每天1次	B.旅游、郊游┋F.太极拳、养生术	d.与我非常相符	e.与我极其相符	b.与我有一点相符	c.与我中等强度相符	e.与我极其相符	a.一点也不相符	e.与我极其相符	d.与我非常相符	e.与我极其相符	a.一点也不相符	e.与我极其相符	d.与我非常相符	d.与我非常相符	c.与我中等强度相符	a.一点也不相符	是	是	是	否	否	否	是	是	否	是	是	是	否	否	否	符合	极符合	极符合	符合	符合	符合	极符合
369	2024/7/5 21:57:46	498秒	微信	N/A	123	女	21-23	专科在读	A.轻微运动（如散步、做广播体操、打门球等）	D.31至59分钟	B.每周3至5次	E.跳绳┋H.游泳	d.与我非常相符	d.与我非常相符	b.与我有一点相符	d.与我非常相符	e.与我极其相符	b.与我有一点相符	c.与我中等强度相符	d.与我非常相符	e.与我极其相符	b.与我有一点相符	d.与我非常相符	e.与我极其相符	c.与我中等强度相符	d.与我非常相符	a.一点也不相符	是	是	是	否	否	否	否	是	是	是	是	是	是	是	是	符合	符合	极符合	不确定	极符合	符合	符合
370	2024/7/5 21:57:57	445秒	微信	N/A	131	男	24-26	本科在读	D.呼吸急促、出汗很多的大强度的，但不持久的运动（如打羽毛球、篮球、网球、足球等）	D.31至59分钟	E.每周1到2次	F.太极拳、养生术┋G.健身器活动	e.与我极其相符	c.与我中等强度相符	b.与我有一点相符	d.与我非常相符	e.与我极其相符	a.一点也不相符	e.与我极其相符	d.与我非常相符	d.与我非常相符	a.一点也不相符	e.与我极其相符	d.与我非常相符	d.与我非常相符	e.与我极其相符	b.与我有一点相符	是	是	是	否	是	是	否	否	是	是	是	是	是	是	是	符合	不确定	符合	极符合	极符合	极符合	符合
371	2024/7/5 21:58:12	516秒	微信	N/A	132	男	21-23	本科在读	B.小强度的不太紧张的运动（如消遣娱乐性的打排球、乒乓球、慢跑、打太极拳等）	E.60分钟以上	D.大约每天1次	E.跳绳┋H.游泳	d.与我非常相符	d.与我非常相符	b.与我有一点相符	e.与我极其相符	d.与我非常相符	a.一点也不相符	e.与我极其相符	d.与我非常相符	e.与我极其相符	b.与我有一点相符	e.与我极其相符	e.与我极其相符	e.与我极其相符	e.与我极其相符	b.与我有一点相符	是	是	否	否	否	否	否	否	是	是	是	是	是	是	是	不确定	符合	极符合	极符合	极符合	符合	符合
372	2024/7/5 21:58:20	460秒	微信	N/A	132	女	21-23	专科在读	C.中等强度较激烈持久的运动（如骑自行车跑步打乒乓球等）	E.60分钟以上	D.大约每天1次	A.散步、跑步┋F.太极拳、养生术┋H.游泳	d.与我非常相符	d.与我非常相符	c.与我中等强度相符	e.与我极其相符	e.与我极其相符	b.与我有一点相符	e.与我极其相符	e.与我极其相符	e.与我极其相符	a.一点也不相符	d.与我非常相符	d.与我非常相符	d.与我非常相符	e.与我极其相符	a.一点也不相符	是	否	是	否	否	是	是	否	是	是	是	是	否	是	是	符合	极符合	极符合	符合	不确定	不确定	极符合
373	2024/7/5 21:58:33	468秒	微信	N/A	135	男	21-23	本科在读	C.中等强度较激烈持久的运动（如骑自行车跑步打乒乓球等）	B.11至20分钟	C.一个月2至3次	A.散步、跑步┋E.跳绳┋F.太极拳、养生术	e.与我极其相符	e.与我极其相符	a.一点也不相符	e.与我极其相符	e.与我极其相符	a.一点也不相符	e.与我极其相符	d.与我非常相符	d.与我非常相符	a.一点也不相符	e.与我极其相符	e.与我极其相符	e.与我极其相符	d.与我非常相符	a.一点也不相符	是	是	是	是	是	是	是	否	否	是	是	是	否	是	是	不确定	极符合	极符合	符合	极符合	符合	不确定
374	2024/7/5 21:58:45	553秒	微信	N/A	125	男	24-26	本科在读	C.中等强度较激烈持久的运动（如骑自行车跑步打乒乓球等）	C.21至30分钟	A.一个月1次以下	A.散步、跑步┋F.太极拳、养生术	e.与我极其相符	d.与我非常相符	a.一点也不相符	d.与我非常相符	e.与我极其相符	a.一点也不相符	e.与我极其相符	e.与我极其相符	d.与我非常相符	b.与我有一点相符	e.与我极其相符	e.与我极其相符	e.与我极其相符	d.与我非常相符	a.一点也不相符	否	是	否	是	否	是	否	是	是	否	是	是	是	否	是	不确定	符合	符合	不确定	符合	符合	不确定
375	2024/7/5 21:59:21	484秒	微信	N/A	120	女	21-23	专科在读	C.中等强度较激烈持久的运动（如骑自行车跑步打乒乓球等）	B.11至20分钟	B.每周3至5次	D.球类┋H.游泳	c.与我中等强度相符	d.与我非常相符	c.与我中等强度相符	e.与我极其相符	d.与我非常相符	a.一点也不相符	d.与我非常相符	e.与我极其相符	d.与我非常相符	b.与我有一点相符	e.与我极其相符	d.与我非常相符	c.与我中等强度相符	d.与我非常相符	b.与我有一点相符	否	否	是	否	否	否	是	否	是	是	是	否	是	是	是	符合	极符合	极符合	符合	符合	不确定	极符合
376	2024/7/5 21:59:30	492秒	微信	N/A	123	女	21-23	本科在读	D.呼吸急促、出汗很多的大强度的，但不持久的运动（如打羽毛球、篮球、网球、足球等）	B.11至20分钟	B.每周3至5次	A.散步、跑步┋B.旅游、郊游┋E.跳绳	e.与我极其相符	d.与我非常相符	a.一点也不相符	c.与我中等强度相符	e.与我极其相符	a.一点也不相符	d.与我非常相符	d.与我非常相符	d.与我非常相符	a.一点也不相符	e.与我极其相符	c.与我中等强度相符	d.与我非常相符	d.与我非常相符	a.一点也不相符	是	是	是	否	是	否	是	是	是	是	是	是	否	否	是	符合	符合	符合	符合	极符合	不确定	符合
377	2024/7/5 21:59:56	479秒	微信	N/A	127	女	21-23	本科在读	D.呼吸急促、出汗很多的大强度的，但不持久的运动（如打羽毛球、篮球、网球、足球等）	B.11至20分钟	E.每周1到2次	B.旅游、郊游┋E.跳绳┋G.健身器活动	d.与我非常相符	e.与我极其相符	a.一点也不相符	d.与我非常相符	c.与我中等强度相符	a.一点也不相符	c.与我中等强度相符	d.与我非常相符	d.与我非常相符	c.与我中等强度相符	e.与我极其相符	e.与我极其相符	d.与我非常相符	d.与我非常相符	a.一点也不相符	是	是	否	否	是	是	是	是	是	是	是	否	是	是	否	符合	不确定	符合	符合	符合	符合	极符合
378	2024/7/5 22:00:12	536秒	微信	N/A	126	男	21-23	本科在读	D.呼吸急促、出汗很多的大强度的，但不持久的运动（如打羽毛球、篮球、网球、足球等）	C.21至30分钟	A.一个月1次以下	A.散步、跑步┋H.游泳	d.与我非常相符	d.与我非常相符	b.与我有一点相符	d.与我非常相符	c.与我中等强度相符	a.一点也不相符	d.与我非常相符	d.与我非常相符	d.与我非常相符	b.与我有一点相符	d.与我非常相符	e.与我极其相符	e.与我极其相符	d.与我非常相符	a.一点也不相符	否	是	是	是	是	是	是	是	是	是	否	是	否	是	是	不确定	符合	极符合	符合	极符合	不确定	极符合
379	2024/7/5 22:50:49	283秒	微信	N/A	86	男	21-23	本科在读	D.呼吸急促、出汗很多的大强度的，但不持久的运动（如打羽毛球、篮球、网球、足球等）	E.60分钟以上	B.每周3至5次	D.球类	a.一点也不相符	a.一点也不相符	a.一点也不相符	b.与我有一点相符	a.一点也不相符	b.与我有一点相符	a.一点也不相符	a.一点也不相符	b.与我有一点相符	c.与我中等强度相符	b.与我有一点相符	a.一点也不相符	a.一点也不相符	a.一点也不相符	c.与我中等强度相符	是	是	否	是	是	是	是	是	是	否	是	是	否	否	否	符合	符合	不符合	不确定	不确定	符合	符合
380	2024/7/5 23:53:33	91秒	微信	N/A	67	男	24-26	硕士在读	C.中等强度较激烈持久的运动（如骑自行车跑步打乒乓球等）	C.21至30分钟	E.每周1到2次	A.散步、跑步┋F.太极拳、养生术┋G.健身器活动┋H.游泳┋I.其他	a.一点也不相符	a.一点也不相符	a.一点也不相符	a.一点也不相符	a.一点也不相符	a.一点也不相符	a.一点也不相符	a.一点也不相符	a.一点也不相符	a.一点也不相符	a.一点也不相符	a.一点也不相符	a.一点也不相符	a.一点也不相符	a.一点也不相符	是	是	是	是	是	是	是	是	是	是	是	是	是	是	是	极不符合	极不符合	极不符合	极不符合	极不符合	极不符合	极不符合
381	2024/7/6 0:10:58	216秒	微信	N/A	87	男	24-26	硕士在读	B.小强度的不太紧张的运动（如消遣娱乐性的打排球、乒乓球、慢跑、打太极拳等）	E.60分钟以上	C.一个月2至3次	A.散步、跑步┋D.球类┋E.跳绳┋H.游泳	a.一点也不相符	b.与我有一点相符	a.一点也不相符	c.与我中等强度相符	a.一点也不相符	c.与我中等强度相符	a.一点也不相符	b.与我有一点相符	c.与我中等强度相符	c.与我中等强度相符	c.与我中等强度相符	b.与我有一点相符	b.与我有一点相符	b.与我有一点相符	b.与我有一点相符	否	否	否	是	否	否	否	是	否	否	是	是	否	否	是	符合	符合	不确定	不确定	不确定	符合	符合
382	2024/7/7 1:19:11	113秒	微信	N/A	93	女	18-20	专科在读	A.轻微运动（如散步、做广播体操、打门球等）	E.60分钟以上	E.每周1到2次	A.散步、跑步┋C.体育舞蹈┋D.球类	a.一点也不相符	b.与我有一点相符	b.与我有一点相符	b.与我有一点相符	b.与我有一点相符	b.与我有一点相符	b.与我有一点相符	b.与我有一点相符	b.与我有一点相符	b.与我有一点相符	b.与我有一点相符	a.一点也不相符	b.与我有一点相符	b.与我有一点相符	b.与我有一点相符	是	是	否	否	否	是	是	是	是	是	是	是	否	否	否	符合	不确定	符合	符合	符合	符合	不确定
383	2024/7/8 16:40:33	110秒	微信	N/A	114	女	21-23	本科在读	B.小强度的不太紧张的运动（如消遣娱乐性的打排球、乒乓球、慢跑、打太极拳等）	C.21至30分钟	C.一个月2至3次	C.体育舞蹈┋F.太极拳、养生术	b.与我有一点相符	b.与我有一点相符	c.与我中等强度相符	c.与我中等强度相符	b.与我有一点相符	c.与我中等强度相符	d.与我非常相符	d.与我非常相符	e.与我极其相符	c.与我中等强度相符	d.与我非常相符	e.与我极其相符	d.与我非常相符	e.与我极其相符	c.与我中等强度相符	是	是	否	是	是	是	是	是	是	是	是	是	否	是	是	符合	符合	不确定	符合	符合	极符合	符合
384	2024/7/8 16:51:05	157秒	手机提交	直接访问	80	女	24-26	硕士在读	B.小强度的不太紧张的运动（如消遣娱乐性的打排球、乒乓球、慢跑、打太极拳等）	D.31至59分钟	B.每周3至5次	B.旅游、郊游┋H.游泳	a.一点也不相符	b.与我有一点相符	b.与我有一点相符	b.与我有一点相符	b.与我有一点相符	d.与我非常相符	b.与我有一点相符	b.与我有一点相符	a.一点也不相符	d.与我非常相符	b.与我有一点相符	b.与我有一点相符	a.一点也不相符	b.与我有一点相符	c.与我中等强度相符	是	否	是	是	否	否	否	否	否	否	是	是	是	否	是	符合	不确定	不符合	不确定	符合	符合	符合
385	2024/7/9 10:16:40	238秒	微信	N/A	101	女	27-29	硕士在读	B.小强度的不太紧张的运动（如消遣娱乐性的打排球、乒乓球、慢跑、打太极拳等）	C.21至30分钟	E.每周1到2次	B.旅游、郊游┋F.太极拳、养生术	b.与我有一点相符	c.与我中等强度相符	b.与我有一点相符	b.与我有一点相符	a.一点也不相符	a.一点也不相符	a.一点也不相符	d.与我非常相符	d.与我非常相符	b.与我有一点相符	d.与我非常相符	a.一点也不相符	b.与我有一点相符	b.与我有一点相符	a.一点也不相符	是	是	否	否	是	是	是	是	是	否	是	是	否	否	否	符合	符合	符合	符合	不确定	符合	符合
386	2024/7/9 10:18:09	137秒	微信	N/A	107	女	21-23	硕士在读	B.小强度的不太紧张的运动（如消遣娱乐性的打排球、乒乓球、慢跑、打太极拳等）	D.31至59分钟	B.每周3至5次	A.散步、跑步┋D.球类	b.与我有一点相符	d.与我非常相符	b.与我有一点相符	c.与我中等强度相符	d.与我非常相符	d.与我非常相符	d.与我非常相符	e.与我极其相符	e.与我极其相符	b.与我有一点相符	c.与我中等强度相符	e.与我极其相符	d.与我非常相符	d.与我非常相符	b.与我有一点相符	否	否	否	是	是	否	是	是	是	否	是	是	否	否	否	符合	不确定	符合	不确定	不确定	符合	符合
387	2024/7/9 20:52:55	193秒	微信	N/A	96	女	21-23	本科在读	A.轻微运动（如散步、做广播体操、打门球等）	E.60分钟以上	A.一个月1次以下	A.散步、跑步┋C.体育舞蹈┋E.跳绳┋G.健身器活动	a.一点也不相符	b.与我有一点相符	a.一点也不相符	e.与我极其相符	c.与我中等强度相符	b.与我有一点相符	a.一点也不相符	e.与我极其相符	e.与我极其相符	c.与我中等强度相符	c.与我中等强度相符	a.一点也不相符	a.一点也不相符	d.与我非常相符	d.与我非常相符	是	是	是	是	是	是	否	是	是	否	是	是	否	否	是	符合	符合	不符合	符合	不符合	符合	符合
388	2024/7/11 16:41:00	201秒	微信	N/A	111	女	21-23	硕士在读	A.轻微运动（如散步、做广播体操、打门球等）	D.31至59分钟	D.大约每天1次	B.旅游、郊游┋D.球类┋F.太极拳、养生术	b.与我有一点相符	a.一点也不相符	a.一点也不相符	b.与我有一点相符	b.与我有一点相符	b.与我有一点相符	a.一点也不相符	d.与我非常相符	e.与我极其相符	b.与我有一点相符	b.与我有一点相符	e.与我极其相符	d.与我非常相符	e.与我极其相符	d.与我非常相符	是	是	否	是	是	是	是	是	是	是	是	是	否	否	否	符合	符合	不符合	符合	极符合	极符合	符合
389	2024/7/11 16:42:11	267秒	微信	N/A	101	女	18-20	本科在读	B.小强度的不太紧张的运动（如消遣娱乐性的打排球、乒乓球、慢跑、打太极拳等）	C.21至30分钟	B.每周3至5次	A.散步、跑步┋B.旅游、郊游┋C.体育舞蹈	a.一点也不相符	b.与我有一点相符	c.与我中等强度相符	d.与我非常相符	b.与我有一点相符	b.与我有一点相符	c.与我中等强度相符	b.与我有一点相符	e.与我极其相符	b.与我有一点相符	b.与我有一点相符	e.与我极其相符	a.一点也不相符	e.与我极其相符	d.与我非常相符	是	是	否	是	是	是	是	是	是	是	是	是	否	否	否	极不符合	符合	符合	符合	符合	极符合	极符合
390	2024/7/14 9:27:36	288秒	微信	N/A	90	女	21-23	硕士在读	A.轻微运动（如散步、做广播体操、打门球等）	C.21至30分钟	D.大约每天1次	A.散步、跑步┋B.旅游、郊游┋C.体育舞蹈┋F.太极拳、养生术	a.一点也不相符	b.与我有一点相符	d.与我非常相符	b.与我有一点相符	a.一点也不相符	c.与我中等强度相符	b.与我有一点相符	a.一点也不相符	d.与我非常相符	e.与我极其相符	a.一点也不相符	b.与我有一点相符	d.与我非常相符	e.与我极其相符	d.与我非常相符	是	是	是	是	是	否	否	是	是	是	是	否	是	否	否	不确定	不确定	不确定	符合	符合	极符合	极符合
391	2024/7/14 18:26:14	183秒	手机提交	直接访问	93	男	24-26	本科在读	B.小强度的不太紧张的运动（如消遣娱乐性的打排球、乒乓球、慢跑、打太极拳等）	D.31至59分钟	B.每周3至5次	A.散步、跑步┋B.旅游、郊游┋D.球类┋H.游泳┋I.其他	c.与我中等强度相符	c.与我中等强度相符	d.与我非常相符	b.与我有一点相符	c.与我中等强度相符	d.与我非常相符	c.与我中等强度相符	c.与我中等强度相符	c.与我中等强度相符	d.与我非常相符	d.与我非常相符	d.与我非常相符	c.与我中等强度相符	c.与我中等强度相符	c.与我中等强度相符	是	是	否	是	是	是	是	是	是	否	是	是	否	是	是	不确定	不确定	不确定	不确定	不确定	不确定	不确定
392	2024/7/14 20:10:53	138秒	手机提交	直接访问	108	女	18-20	本科在读	D.呼吸急促、出汗很多的大强度的，但不持久的运动（如打羽毛球、篮球、网球、足球等）	D.31至59分钟	E.每周1到2次	D.球类┋H.游泳	b.与我有一点相符	c.与我中等强度相符	b.与我有一点相符	c.与我中等强度相符	c.与我中等强度相符	a.一点也不相符	a.一点也不相符	b.与我有一点相符	e.与我极其相符	b.与我有一点相符	a.一点也不相符	e.与我极其相符	c.与我中等强度相符	e.与我极其相符	a.一点也不相符	是	是	否	是	是	是	是	是	否	是	是	是	否	是	否	不确定	符合	不确定	极不符合	不符合	极符合	符合
393	2024/7/16 17:01:56	166秒	手机提交	直接访问	107	女	21-23	本科在读	B.小强度的不太紧张的运动（如消遣娱乐性的打排球、乒乓球、慢跑、打太极拳等）	C.21至30分钟	B.每周3至5次	A.散步、跑步┋B.旅游、郊游┋E.跳绳	c.与我中等强度相符	d.与我非常相符	a.一点也不相符	d.与我非常相符	d.与我非常相符	a.一点也不相符	c.与我中等强度相符	d.与我非常相符	d.与我非常相符	a.一点也不相符	d.与我非常相符	d.与我非常相符	d.与我非常相符	d.与我非常相符	a.一点也不相符	否	否	是	是	否	否	否	否	否	否	否	否	是	是	是	不符合	不符合	不符合	不确定	符合	符合	符合
394	2024/7/16 21:06:58	185秒	手机提交	直接访问	102	女	18-20	本科在读	B.小强度的不太紧张的运动（如消遣娱乐性的打排球、乒乓球、慢跑、打太极拳等）	C.21至30分钟	C.一个月2至3次	A.散步、跑步	b.与我有一点相符	c.与我中等强度相符	a.一点也不相符	c.与我中等强度相符	c.与我中等强度相符	b.与我有一点相符	b.与我有一点相符	d.与我非常相符	e.与我极其相符	b.与我有一点相符	b.与我有一点相符	a.一点也不相符	b.与我有一点相符	c.与我中等强度相符	b.与我有一点相符	是	是	否	否	是	是	是	是	是	是	是	是	是	是	是	符合	符合	不确定	不确定	不确定	符合	符合
395	2024/7/20 14:05:40	145秒	手机提交	直接访问	98	女	18-20	本科在读	A.轻微运动（如散步、做广播体操、打门球等）	B.11至20分钟	E.每周1到2次	A.散步、跑步┋E.跳绳	d.与我非常相符	e.与我极其相符	a.一点也不相符	d.与我非常相符	d.与我非常相符	a.一点也不相符	d.与我非常相符	d.与我非常相符	c.与我中等强度相符	a.一点也不相符	e.与我极其相符	c.与我中等强度相符	d.与我非常相符	d.与我非常相符	a.一点也不相符	是	否	否	是	是	是	是	否	否	否	否	是	是	否	是	不确定	不确定	不符合	不符合	极不符合	不符合	不符合
396	2024/7/23 17:21:10	165秒	微信	N/A	114	女	24-26	硕士在读	D.呼吸急促、出汗很多的大强度的，但不持久的运动（如打羽毛球、篮球、网球、足球等）	D.31至59分钟	A.一个月1次以下	A.散步、跑步┋D.球类	c.与我中等强度相符	d.与我非常相符	b.与我有一点相符	d.与我非常相符	d.与我非常相符	a.一点也不相符	d.与我非常相符	d.与我非常相符	e.与我极其相符	a.一点也不相符	d.与我非常相符	d.与我非常相符	e.与我极其相符	d.与我非常相符	a.一点也不相符	是	否	否	是	是	是	是	是	是	是	是	是	否	否	是	符合	不确定	不确定	不符合	不符合	符合	不符合
397	2024/7/29 20:03:00	83秒	微信	N/A	109	女	24-26	硕士在读	A.轻微运动（如散步、做广播体操、打门球等）	C.21至30分钟	C.一个月2至3次	A.散步、跑步┋B.旅游、郊游	d.与我非常相符	d.与我非常相符	c.与我中等强度相符	d.与我非常相符	d.与我非常相符	b.与我有一点相符	d.与我非常相符	d.与我非常相符	d.与我非常相符	b.与我有一点相符	d.与我非常相符	d.与我非常相符	d.与我非常相符	d.与我非常相符	b.与我有一点相符	是	是	否	否	是	是	是	是	是	否	是	是	否	否	否	符合	符合	不确定	不确定	不确定	符合	符合
398	2024/7/30 4:00:57	123秒	链接	直接访问	102	男	21-23	硕士在读	D.呼吸急促、出汗很多的大强度的，但不持久的运动（如打羽毛球、篮球、网球、足球等）	E.60分钟以上	B.每周3至5次	D.球类┋G.健身器活动	a.一点也不相符	b.与我有一点相符	c.与我中等强度相符	b.与我有一点相符	b.与我有一点相符	a.一点也不相符	a.一点也不相符	b.与我有一点相符	e.与我极其相符	c.与我中等强度相符	b.与我有一点相符	b.与我有一点相符	a.一点也不相符	c.与我中等强度相符	c.与我中等强度相符	是	是	否	是	是	是	是	是	是	否	是	是	否	否	否	极符合	符合	符合	极符合	符合	极符合	符合
399	2024/7/31 23:55:10	166秒	微信	N/A	102	男	24-26	硕士在读	D.呼吸急促、出汗很多的大强度的，但不持久的运动（如打羽毛球、篮球、网球、足球等）	E.60分钟以上	B.每周3至5次	B.旅游、郊游┋C.体育舞蹈┋D.球类┋F.太极拳、养生术	b.与我有一点相符	c.与我中等强度相符	c.与我中等强度相符	c.与我中等强度相符	c.与我中等强度相符	c.与我中等强度相符	b.与我有一点相符	b.与我有一点相符	d.与我非常相符	d.与我非常相符	d.与我非常相符	a.一点也不相符	b.与我有一点相符	b.与我有一点相符	a.一点也不相符	是	是	否	否	是	是	否	是	是	是	是	是	是	否	否	符合	符合	符合	极符合	符合	不确定	符合
[truncated: 3 more columns]
