# Supplementary material for: The impact of physical activity on social anxiety among college students: an analysis of the chain mediation effect of family support and self-efficacy
Source: PeerJ journal article supplement (doi:10.7717/peerj.20511), 2026-01-05
Supplement: raw_data.zip [file Survey Data Social Anxiety.xlsx]

## Sheet: Sheet1
Serial number	Time to submit the answer sheet	Time taken	Source	Source details	Total score	Gender	Age	Study situation at this stage	1. How hard do you exercise? （ ）	2. How many minutes do you do the above intensity sports activities? ()	3. How many times a month do you do the above sports activities? （ ）	4. What kind of sports do you like? （ ）	1. I often feel nervous even at informal gatherings.	2. I usually feel uncomfortable with a group of people I don't know.	3. I usually feel relaxed when talking to a person of the opposite sex. （R）	4. I get nervous when I have to talk to teachers or superiors.	5. Parties often make me feel anxious and uncomfortable.	6. I'm probably less shy in social interactions than most people (R)	7. I often get nervous talking to people of the same sex I don't know very well.	8. I get nervous during job interviews.	I wish I had more confidence in social situations.	10. I rarely feel anxious in social situations. (R)	Generally speaking, I am a shy person.	12. I often feel nervous when talking to an attractive member of the opposite sex.	13. I usually feel nervous when I call someone I don't know well.	14. I get nervous talking to authority figures.	15. Even in the midst of a group of people who are quite different from me, I usually feel relaxed. (R)	1. When I need it, my family will give me unshirkable support.	2. I can get good ideas from family members.	3. I don't have as close relationships with family members as I do with others.	4. When I confide my pain to the closest member of my family, he or she feels the same pain.	5. Family members are willing to listen to my ideas.	6. I share a lot of happiness with my family members.	7. I rely on family members for emotional support.	8. If I feel depressed, I can talk to a family member and not be laughed at later.	9. I can openly communicate with my family members about the common things they consider.	10. My family members are sensitive to my personal needs.	11. Family members are willing to help me solve problems.	12. I have a good relationship with many family members.	13. When I confide in a family member, it makes me feel uncomfortable.	14. I feel uncomfortable if other people and family members are too close to each other.	15. I want my family to be different.	1. If I try my best, I can always solve the problem.	2. Even if others oppose me, I still have a way to get what I want.	3. It's easy for me to stick to my ideals and achieve my goals.	4. I am confident that I can deal effectively with any unexpected event.	5. With my intelligence, I will be able to cope with unexpected situations.	6. I can solve most of my problems if I put in the necessary effort.	7. I can face difficulties calmly because I can rely on my ability to deal with problems.
1	2024/6/28 18:54:19	254 seconds	WeChat	N/A	112	Male	21-23	Undergraduate study	B. Low-intensity and low-tension sports (such as recreational volleyball, table tennis, jogging, Tai Chi, etc.)	E. More than 60 minutes	B. Three to five times a week	A. Walking, running B. Travel, outing D. Ball games H. Swimming	D. Very much in line with me	E. Extremely in line with me	C. Consistent with my moderate intensity	D. Very much in line with me	D. Very much in line with me	C. Consistent with my moderate intensity	C. Consistent with my moderate intensity	D. Very much in line with me	D. Very much in line with me	C. Consistent with my moderate intensity	C. Consistent with my moderate intensity	D. Very much in line with me	D. Very much in line with me	D. Very much in line with me	C. Consistent with my moderate intensity	Yes	Yes	No	Yes	Yes	Yes	Yes	Yes	Yes	No	Yes	Yes	No	No	Yes	Conform	Conform	Conform	Conform	Not sure	Conform	Not sure
2	2024/6/28 19:03:04	1201Seconds	WeChat	N/A	103	Female	24-26	I'm studying for a master's degree	D.Intense but not sustained exercise (such as playing badminton, basketball, tennis, football, etc.) with shortness of breath and a lot of sweating	E.60More than minutes	E.Every week1To2Times	G.Exercise machine activity	a.It doesn't match at all.	c.Consistent with my moderate intensity.	b.Matches me a little bit.	c.Consistent with my moderate intensity.	c.Consistent with my moderate intensity.	b.Matches me a little bit.	a.It doesn't match at all.	e.Matches me perfectly.	e.Matches me perfectly.	e.Matches me perfectly.	b.Matches me a little bit.	a.It doesn't match at all.	a.It doesn't match at all.	b.Matches me a little bit.	a.It doesn't match at all.	Yes	Yes	No	Yes	Yes	Yes	Yes	Yes	Yes	Yes	Yes	Yes	No	No	No	Conform	Conform	Not sure	Not sure	Conform	Conform	Conform
3	2024/6/28 19:05:15	448 seconds	WeChat	N/A	86	Male	33 and above	I'm studying for a master's degree	A. Light exercise (such as walking, doing radio gymnastics, playing gateball, etc.)	C. 21 to 30 minutes	C. 2 to 3 times a month	A. Walking and running B. Travel and outing F. Tai Chi and science of health preserving.	A. Not at all.	A. Not at all.	B. a little bit in line with me.	B. a little bit in line with me.	A. Not at all.	B. a little bit in line with me.	B. a little bit in line with me.	B. a little bit in line with me.	B. a little bit in line with me.	B. a little bit in line with me.	B. a little bit in line with me.	B. a little bit in line with me.	B. a little bit in line with me.	B. a little bit in line with me.	B. a little bit in line with me.	Yes	Yes	No	No	Yes	Yes	Yes	Yes	Yes	No	Yes	Yes	No	No	No	Conform	Conform	Does not match	Conform	Not sure	Not sure	Conform
4	2024/6/28 19:12:50	307 seconds	WeChat	N/A	95	Female	24-26	Undergraduate study	A. Light exercise (such as walking, doing radio gymnastics, playing gateball, etc.)	A. Less than 10 minutes	A. Less than once A month	A. Walking and running B. Travel and outing	D. Very much in line with me	E. Extremely in line with me	A. Not at all.	D. Very much in line with me	D. Very much in line with me	E. Extremely in line with me	B. a little bit in line with me.	E. Extremely in line with me	E. Extremely in line with me	B. a little bit in line with me.	D. Very much in line with me	E. Extremely in line with me	A. Not at all.	D. Very much in line with me	A. Not at all.	No	No	Yes	Yes	No	No	No	No	No	No	No	No	Yes	No	Yes	Not sure	Not sure	Not sure	Extremely inconsistent	Not sure	Conform	Not sure
5	2024/6/28 19:44:54	717 seconds	WeChat	N/A	92	Female	24-26	I'm studying for a master's degree	B. Low-intensity and low-tension sports (such as recreational volleyball, table tennis, jogging, Tai Chi, etc.)	E. More than 60 minutes	E. 1-2 times per week	D. Ball games	A. Not at all.	B. a little bit in line with me.	B. a little bit in line with me.	C. Consistent with my moderate intensity	A. Not at all.	B. a little bit in line with me.	A. Not at all.	C. Consistent with my moderate intensity	D. Very much in line with me	B. a little bit in line with me.	C. Consistent with my moderate intensity	D. Very much in line with me	D. Very much in line with me	D. Very much in line with me	D. Very much in line with me	Yes	Yes	No	No	Yes	Yes	Yes	Yes	Yes	No	Yes	Yes	No	No	Yes	Not sure	Conform	Not sure	Does not match	Does not match	Conform	Does not match
6	2024/6/28 20:18:45	303 seconds	WeChat	N/A	89	Female	24-26	I'm studying for a master's degree	C. Moderate intensity and more intense and lasting exercise (such as cycling, running, playing table tennis, etc.)	D. 31 to 59 minutes	E. 1-2 times per week	A. Walking, running B. Travel, outing D. Ball games E. Skipping rope	A. Not at all.	B. a little bit in line with me.	A. Not at all.	B. a little bit in line with me.	A. Not at all.	D. Very much in line with me	A. Not at all.	C. Consistent with my moderate intensity	B. a little bit in line with me.	A. Not at all.	B. a little bit in line with me.	C. Consistent with my moderate intensity	A. Not at all.	C. Consistent with my moderate intensity	B. a little bit in line with me.	Yes	Yes	No	No	Yes	Yes	Yes	Yes	Yes	No	Yes	Yes	No	No	No	Conform	Not sure	Does not match	Not sure	Not sure	Not sure	Not sure
7	2024/6/28 21:05:28	140 seconds	WeChat	N/A	104	Female	18-20	Undergraduate study	B. Low-intensity and low-tension sports (such as recreational volleyball, table tennis, jogging, Tai Chi, etc.)	B. 11 to 20 minutes	E. 1-2 times per week	A. Walking and running	D. Very much in line with me	E. Extremely in line with me	A. Not at all.	D. Very much in line with me	D. Very much in line with me	C. Consistent with my moderate intensity	C. Consistent with my moderate intensity	C. Consistent with my moderate intensity	C. Consistent with my moderate intensity	A. Not at all.	B. a little bit in line with me.	B. a little bit in line with me.	D. Very much in line with me	D. Very much in line with me	A. Not at all.	No	No	No	Yes	No	No	No	No	No	Yes	Yes	No	Yes	No	No	Conform	Conform	Not sure	Not sure	Not sure	Conform	Conform
8	2024/6/28 21:06:08	176 seconds	WeChat	N/A	84	Male	18-20	Undergraduate study	A. Light exercise (such as walking, doing radio gymnastics, playing gateball, etc.)	C. 21 to 30 minutes	A. Less than once A month	A. Walking and running	A. Not at all.	B. a little bit in line with me.	B. a little bit in line with me.	B. a little bit in line with me.	A. Not at all.	B. a little bit in line with me.	B. a little bit in line with me.	B. a little bit in line with me.	B. a little bit in line with me.	B. a little bit in line with me.	B. a little bit in line with me.	B. a little bit in line with me.	B. a little bit in line with me.	B. a little bit in line with me.	B. a little bit in line with me.	Yes	No	No	No	Yes	No	Yes	No	Yes	No	Yes	Yes	No	No	No	Conform	Conform	Not sure	Not sure	Conform	Conform	Conform
9	2024/6/28 21:06:22	202 seconds	WeChat	N/A	104	Female	18-20	Undergraduate study	A. Light exercise (such as walking, doing radio gymnastics, playing gateball, etc.)	B. 11 to 20 minutes	C. Two to three times a month	D. Ball games	D. Very much in line with me	D. Very much in line with me	C. Consistent with my moderate intensity	D. Very much in line with me	D. Very much in line with me	A. Not at all.	C. Consistent with my moderate intensity	C. Consistent with my moderate intensity	C. Consistent with my moderate intensity	A. Not at all.	D. Very much in line with me	C. Consistent with my moderate intensity	D. Very much in line with me	D. Very much in line with me	C. Consistent with my moderate intensity	Yes	Yes	No	No	Yes	No	No	Yes	Yes	No	Yes	Yes	No	Yes	No	Conform	Conform	Not sure	Not sure	Not sure	Conform	Not sure
10	2024/6/28 21:07:37	313 seconds	Mobile submission	Direct access	97	Female	21-23	Undergraduate study	B. Low-intensity and low-tension sports (such as recreational volleyball, table tennis, jogging, Tai Chi, etc.)	E. More than 60 minutes	E. 1-2 times per week	A. Walking and running D. Ball games	B. a little bit in line with me.	C. Consistent with my moderate intensity	A. Not at all.	D. Very much in line with me	B. a little bit in line with me.	A. Not at all.	B. a little bit in line with me.	D. Very much in line with me	D. Very much in line with me	C. Consistent with my moderate intensity	B. a little bit in line with me.	B. a little bit in line with me.	B. a little bit in line with me.	D. Very much in line with me	A. Not at all.	Yes	No	Yes	Yes	Yes	No	No	No	Yes	No	Yes	No	Yes	No	Yes	Not sure	Not sure	Does not match	Does not match	Does not match	Not sure	Does not match
11	2024/6/28 21:09:23	201 seconds	WeChat	N/A	92	Male	18-20	Undergraduate study	B. Low-intensity and low-tension sports (such as recreational volleyball, table tennis, jogging, Tai Chi, etc.)	E. More than 60 minutes	E. 1-2 times per week	D. Ball games	B. a little bit in line with me.	A. Not at all.	B. a little bit in line with me.	B. a little bit in line with me.	A. Not at all.	B. a little bit in line with me.	A. Not at all.	B. a little bit in line with me.	C. Consistent with my moderate intensity	C. Consistent with my moderate intensity	A. Not at all.	B. a little bit in line with me.	B. a little bit in line with me.	B. a little bit in line with me.	B. a little bit in line with me.	Yes	Yes	No	Yes	Yes	Yes	Yes	Yes	Yes	No	Yes	Yes	No	No	No	Conform	Conform	Not sure	Not sure	Not sure	Conform	Conform
12	2024/6/28 21:09:55	186 seconds	WeChat	N/A	101	Female	18-20	Undergraduate study	B. Low-intensity and low-tension sports (such as recreational volleyball, table tennis, jogging, Tai Chi, etc.)	C. 21 to 30 minutes	E. 1-2 times per week	A. Walking, running B. Travel, outing D. Ball games	B. a little bit in line with me.	D. Very much in line with me	B. a little bit in line with me.	C. Consistent with my moderate intensity	B. a little bit in line with me.	A. Not at all.	B. a little bit in line with me.	C. Consistent with my moderate intensity	C. Consistent with my moderate intensity	A. Not at all.	B. a little bit in line with me.	C. Consistent with my moderate intensity	B. a little bit in line with me.	C. Consistent with my moderate intensity	B. a little bit in line with me.	Yes	Yes	No	No	Yes	Yes	Yes	Yes	Yes	Yes	Yes	Yes	No	No	No	Conform	Conform	Not sure	Not sure	Not sure	Conform	Not sure
13	2024/6/28 21:15:00	207 seconds	WeChat	N/A	105	Male	18-20	Undergraduate study	D. High-intensity but not sustained exercise with shortness of breath and a lot of sweating (such as playing badminton, basketball, tennis, football, etc.)	E. More than 60 minutes	B. Three to five times a week	A. Walking and running D. Ball games H. Swimming	B. a little bit in line with me.	B. a little bit in line with me.	B. a little bit in line with me.	D. Very much in line with me	B. a little bit in line with me.	B. a little bit in line with me.	B. a little bit in line with me.	D. Very much in line with me	D. Very much in line with me	B. a little bit in line with me.	B. a little bit in line with me.	C. Consistent with my moderate intensity	C. Consistent with my moderate intensity	C. Consistent with my moderate intensity	B. a little bit in line with me.	Yes	Yes	No	Yes	Yes	Yes	Yes	Yes	Yes	Yes	Yes	Yes	No	No	No	Conform	Conform	Not sure	Conform	Not sure	Conform	Conform
14	2024/6/28 21:15:43	258 seconds	WeChat	N/A	108	Male	18-20	Undergraduate study	C. Moderate intensity and more intense and lasting exercise (such as cycling, running, playing table tennis, etc.)	D. 31 to 59 minutes	C. Two to three times a month	D. Ball games	B. a little bit in line with me.	B. a little bit in line with me.	B. a little bit in line with me.	B. a little bit in line with me.	C. Consistent with my moderate intensity	D. Very much in line with me	C. Consistent with my moderate intensity	D. Very much in line with me	E. Extremely in line with me	C. Consistent with my moderate intensity	D. Very much in line with me	D. Very much in line with me	C. Consistent with my moderate intensity	C. Consistent with my moderate intensity	B. a little bit in line with me.	Yes	Yes	Yes	Yes	Yes	Yes	Yes	Yes	Yes	Yes	Yes	Yes	Yes	Yes	Yes	Conform	Conform	Not sure	Conform	Conform	Conform	Conform
15	2024/6/28 21:19:22	234 seconds	WeChat	N/A	95	Male	18-20	Undergraduate study	A. Light exercise (such as walking, doing radio gymnastics, playing gateball, etc.)	C. 21 to 30 minutes	B. Three to five times a week	A. Walking and running D. Ball games	B. a little bit in line with me.	B. a little bit in line with me.	B. a little bit in line with me.	C. Consistent with my moderate intensity	C. Consistent with my moderate intensity	C. Consistent with my moderate intensity	B. a little bit in line with me.	B. a little bit in line with me.	E. Extremely in line with me	D. Very much in line with me	B. a little bit in line with me.	A. Not at all.	B. a little bit in line with me.	C. Consistent with my moderate intensity	B. a little bit in line with me.	Yes	Yes	No	No	Yes	Yes	No	Yes	Yes	No	Yes	Yes	No	No	No	Conform	Conform	Not sure	Not sure	Not sure	Extremely in line	Extremely in line
16	2024/6/28 21:23:03	293 seconds	WeChat	N/A	85	Female	18-20	Undergraduate study	B. Low-intensity and low-tension sports (such as recreational volleyball, table tennis, jogging, Tai Chi, etc.)	D. 31 to 59 minutes	E. 1-2 times per week	A. Walking, running B. Travel, outing D. Ball games F. Tai Chi, science of health preserving G. Fitness equipment activities H. Swimming	A. Not at all.	B. a little bit in line with me.	C. Consistent with my moderate intensity	B. a little bit in line with me.	B. a little bit in line with me.	D. Very much in line with me	B. a little bit in line with me.	C. Consistent with my moderate intensity	B. a little bit in line with me.	D. Very much in line with me	B. a little bit in line with me.	C. Consistent with my moderate intensity	B. a little bit in line with me.	C. Consistent with my moderate intensity	D. Very much in line with me	Yes	Yes	No	No	Yes	Yes	Yes	Yes	Yes	No	Yes	Yes	No	No	No	Conform	Not sure	Not sure	Not sure	Not sure	Conform	Not sure
17	2024/6/28 21:28:29	84 seconds	WeChat	N/A	81	Male	18-20	Undergraduate study	A. Light exercise (such as walking, doing radio gymnastics, playing gateball, etc.)	A. Less than 10 minutes	B. Three to five times a week	A. Walking and running B. Travel and outing	A. Not at all.	B. a little bit in line with me.	D. Very much in line with me	A. Not at all.	C. Consistent with my moderate intensity	C. Consistent with my moderate intensity	C. Consistent with my moderate intensity	C. Consistent with my moderate intensity	C. Consistent with my moderate intensity	C. Consistent with my moderate intensity	A. Not at all.	E. Extremely in line with me	D. Very much in line with me	C. Consistent with my moderate intensity	C. Consistent with my moderate intensity	No	No	Yes	No	Yes	No	No	No	Yes	Yes	Yes	No	Yes	No	Yes	Not sure	Not sure	Not sure	Not sure	Not sure	Not sure	Not sure
18	2024/6/28 21:38:24	213 seconds	Mobile submission	Direct access	104	Female	18-20	Undergraduate study	D. High-intensity but not sustained exercise with shortness of breath and a lot of sweating (such as playing badminton, basketball, tennis, football, etc.)	C. 21 to 30 minutes	C. Two to three times a month	A. Walking and running D. Ball games	B. a little bit in line with me.	B. a little bit in line with me.	A. Not at all.	B. a little bit in line with me.	C. Consistent with my moderate intensity	A. Not at all.	B. a little bit in line with me.	B. a little bit in line with me.	E. Extremely in line with me	B. a little bit in line with me.	B. a little bit in line with me.	B. a little bit in line with me.	C. Consistent with my moderate intensity	D. Very much in line with me	B. a little bit in line with me.	Yes	Yes	No	Yes	Yes	Yes	Yes	Yes	Yes	Yes	Yes	Yes	No	No	No	Conform	Conform	Not sure	Conform	Not sure	Conform	Conform
19	2024/6/28 21:42:40	201 seconds	WeChat	N/A	101	Male	18-20	Undergraduate study	C. Moderate intensity and more intense and lasting exercise (such as cycling, running, playing table tennis, etc.)	D. 31 to 59 minutes	D. Approximately once a day	A. Walking, running B. Travel, outing D. Ball games E. Skipping rope	B. a little bit in line with me.	C. Consistent with my moderate intensity	C. Consistent with my moderate intensity	C. Consistent with my moderate intensity	A. Not at all.	A. Not at all.	A. Not at all.	B. a little bit in line with me.	C. Consistent with my moderate intensity	C. Consistent with my moderate intensity	B. a little bit in line with me.	B. a little bit in line with me.	B. a little bit in line with me.	B. a little bit in line with me.	B. a little bit in line with me.	Yes	Yes	No	Yes	Yes	Yes	Yes	Yes	Yes	Yes	Yes	Yes	Yes	Yes	Yes	Extremely in line	Conform	Not sure	Not sure	Not sure	Conform	Conform
20	2024/6/28 21:55:49	113 seconds	WeChat	N/A	94	Female	18-20	Undergraduate study	B. Low-intensity and low-tension sports (such as recreational volleyball, table tennis, jogging, Tai Chi, etc.)	C. 21 to 30 minutes	C. Two to three times a month	A. Walking, running B. Travel, outing F. Tai Chi, science of health preserving G. Fitness equipment activities	B. a little bit in line with me.	B. a little bit in line with me.	B. a little bit in line with me.	B. a little bit in line with me.	B. a little bit in line with me.	B. a little bit in line with me.	B. a little bit in line with me.	B. a little bit in line with me.	B. a little bit in line with me.	B. a little bit in line with me.	B. a little bit in line with me.	B. a little bit in line with me.	B. a little bit in line with me.	B. a little bit in line with me.	B. a little bit in line with me.	Yes	Yes	Yes	Yes	Yes	Yes	Yes	Yes	Yes	Yes	Yes	Yes	Yes	Yes	Yes	Conform	Conform	Conform	Not sure	Not sure	Not sure	Not sure
21	2024/6/28 21:57:35	166 seconds	WeChat	N/A	86	Male	18-20	Undergraduate study	B. Low-intensity and low-tension sports (such as recreational volleyball, table tennis, jogging, Tai Chi, etc.)	B. 11 to 20 minutes	B. Three to five times a week	A. Walking and running	C. Consistent with my moderate intensity	C. Consistent with my moderate intensity	C. Consistent with my moderate intensity	C. Consistent with my moderate intensity	C. Consistent with my moderate intensity	C. Consistent with my moderate intensity	C. Consistent with my moderate intensity	C. Consistent with my moderate intensity	C. Consistent with my moderate intensity	C. Consistent with my moderate intensity	C. Consistent with my moderate intensity	C. Consistent with my moderate intensity	C. Consistent with my moderate intensity	C. Consistent with my moderate intensity	C. Consistent with my moderate intensity	No	No	Yes	No	No	No	No	No	No	Yes	No	No	Yes	No	Yes	Conform	Not sure	Not sure	Not sure	Not sure	Not sure	Not sure
22	2024/6/28 22:20:24	265 seconds	WeChat	N/A	109	Male	18-20	Undergraduate study	C. Moderate intensity and more intense and lasting exercise (such as cycling, running, playing table tennis, etc.)	C. 21 to 30 minutes	E. 1-2 times per week	A. Walking, running B. Travel, outing D. Ball games	C. Consistent with my moderate intensity	D. Very much in line with me	B. a little bit in line with me.	D. Very much in line with me	C. Consistent with my moderate intensity	C. Consistent with my moderate intensity	D. Very much in line with me	D. Very much in line with me	E. Extremely in line with me	B. a little bit in line with me.	B. a little bit in line with me.	E. Extremely in line with me	C. Consistent with my moderate intensity	E. Extremely in line with me	C. Consistent with my moderate intensity	Yes	Yes	Yes	Yes	Yes	No	No	No	No	No	Yes	Yes	No	No	Yes	Conform	Not sure	Not sure	Does not match	Not sure	Conform	Conform
23	2024/6/28 22:41:24	226 seconds	WeChat	N/A	98	Male	18-20	Undergraduate study	C. Moderate intensity and more intense and lasting exercise (such as cycling, running, playing table tennis, etc.)	D. 31 to 59 minutes	D. Approximately once a day	D. Ball games E. Rope skipping	B. a little bit in line with me.	B. a little bit in line with me.	D. Very much in line with me	B. a little bit in line with me.	B. a little bit in line with me.	B. a little bit in line with me.	B. a little bit in line with me.	D. Very much in line with me	D. Very much in line with me	C. Consistent with my moderate intensity	C. Consistent with my moderate intensity	C. Consistent with my moderate intensity	B. a little bit in line with me.	B. a little bit in line with me.	B. a little bit in line with me.	Yes	Yes	Yes	No	Yes	Yes	Yes	Yes	Yes	Yes	Yes	Yes	Yes	Yes	Yes	Conform	Not sure	Not sure	Not sure	Not sure	Conform	Not sure
24	2024/6/28 22:46:05	221 seconds	WeChat	N/A	98	Male	18-20	Undergraduate study	C. Moderate intensity and more intense and lasting exercise (such as cycling, running, playing table tennis, etc.)	C. 21 to 30 minutes	E. 1-2 times per week	A. Walking and running B. Travel and outing F. Tai Chi and science of health preserving.	C. Consistent with my moderate intensity	C. Consistent with my moderate intensity	A. Not at all.	B. a little bit in line with me.	C. Consistent with my moderate intensity	A. Not at all.	B. a little bit in line with me.	B. a little bit in line with me.	C. Consistent with my moderate intensity	B. a little bit in line with me.	C. Consistent with my moderate intensity	C. Consistent with my moderate intensity	A. Not at all.	B. a little bit in line with me.	B. a little bit in line with me.	Yes	Yes	No	No	Yes	No	Yes	Yes	Yes	Yes	Yes	Yes	Yes	Yes	Yes	Not sure	Not sure	Does not match	Not sure	Not sure	Not sure	Not sure
25	2024/6/28 23:36:39	235 seconds	WeChat	N/A	90	Male	24-26	I'm studying for a master's degree	D. High-intensity but not sustained exercise with shortness of breath and a lot of sweating (such as playing badminton, basketball, tennis, football, etc.)	E. More than 60 minutes	E. 1-2 times per week	A. Walking and running F. Tai Chi and science of health preserving.	A. Not at all.	B. a little bit in line with me.	D. Very much in line with me	B. a little bit in line with me.	B. a little bit in line with me.	B. a little bit in line with me.	B. a little bit in line with me.	B. a little bit in line with me.	B. a little bit in line with me.	B. a little bit in line with me.	B. a little bit in line with me.	B. a little bit in line with me.	B. a little bit in line with me.	B. a little bit in line with me.	B. a little bit in line with me.	Yes	Yes	No	Yes	No	No	Yes	Yes	Yes	No	Yes	Yes	No	No	No	Not sure	Not sure	Not sure	Not sure	Not sure	Not sure	Conform
26	2024/6/28 23:39:15	224 seconds	WeChat	N/A	105	Female	24-26	I'm studying for a master's degree	D. High-intensity but not sustained exercise with shortness of breath and a lot of sweating (such as playing badminton, basketball, tennis, football, etc.)	E. More than 60 minutes	C. 2 to 3 times a month	C. Sports Dance D. Ball Games	B. a little bit in line with me.	B. a little bit in line with me.	A. Not at all.	D. Very much in line with me	B. a little bit in line with me.	B. a little bit in line with me.	A. Not at all.	D. Very much in line with me	D. Very much in line with me	A. Not at all.	C. Consistent with my moderate intensity	C. Consistent with my moderate intensity	B. a little bit in line with me.	D. Very much in line with me	E. Extremely in line with me	Yes	Yes	Yes	No	Yes	Yes	Yes	Yes	Yes	No	Yes	Yes	No	Yes	Yes	Conform	Not sure	Conform	Not sure	Not sure	Conform	Conform
27	2024/6/28 23:41:21	187 seconds	WeChat	N/A	120	Female	21-23	I'm studying for a master's degree	B. Low-intensity and low-tension sports (such as recreational volleyball, table tennis, jogging, Tai Chi, etc.)	E. More than 60 minutes	E. 1-2 times per week	D. Ball games	D. Very much in line with me	D. Very much in line with me	B. a little bit in line with me.	D. Very much in line with me	D. Very much in line with me	E. Extremely in line with me	D. Very much in line with me	E. Extremely in line with me	E. Extremely in line with me	A. Not at all.	E. Extremely in line with me	D. Very much in line with me	D. Very much in line with me	D. Very much in line with me	A. Not at all.	Yes	Yes	No	Yes	Yes	Yes	Yes	Yes	Yes	Yes	Yes	Yes	No	No	Yes	Conform	Conform	Not sure	Not sure	Not sure	Conform	Conform
28	2024/6/28 23:42:08	65Seconds	WeChat	N/A	104	Male	18-20	Undergraduate study	C.Moderate intensity, more intense and sustained exercise (such as cycling, running, playing table tennis, etc.)	D.31To59Minute	A.One month1Below the second	A.Walk, runC.Sports danceD.Ball gamesE.Rope skippingG.Exercise machine activityH.Swim	a.It doesn't match at all.	a.It doesn't match at all.	a.It doesn't match at all.	a.It doesn't match at all.	a.It doesn't match at all.	a.It doesn't match at all.	a.It doesn't match at all.	a.It doesn't match at all.	a.It doesn't match at all.	a.It doesn't match at all.	a.It doesn't match at all.	a.It doesn't match at all.	a.It doesn't match at all.	a.It doesn't match at all.	a.It doesn't match at all.	Yes	Yes	Yes	Yes	Yes	Yes	Yes	Yes	Yes	Yes	Yes	Yes	Yes	Yes	Yes	Extremely in line	Extremely in line	Extremely in line	Extremely in line	Extremely in line	Extremely in line	Extremely in line
29	2024/6/28 23:42:21	162 seconds	WeChat	N/A	101	Male	21-23	Undergraduate study	D. High-intensity but not sustained exercise with shortness of breath and a lot of sweating (such as playing badminton, basketball, tennis, football, etc.)	E. More than 60 minutes	E. 1-2 times per week	A. Walking, running B. Travel, outing D. Ball games	A. Not at all.	B. a little bit in line with me.	D. Very much in line with me	C. Consistent with my moderate intensity	C. Consistent with my moderate intensity	B. a little bit in line with me.	A. Not at all.	E. Extremely in line with me	E. Extremely in line with me	B. a little bit in line with me.	D. Very much in line with me	D. Very much in line with me	E. Extremely in line with me	E. Extremely in line with me	C. Consistent with my moderate intensity	Yes	Yes	No	No	No	No	No	No	Yes	No	Yes	Yes	Yes	No	No	Conform	Not sure	Not sure	Does not match	Not sure	Not sure	Not sure
30	2024/6/28 23:42:24	128 seconds	WeChat	N/A	96	Male	24-26	I'm studying for a master's degree	B. Low-intensity and low-tension sports (such as recreational volleyball, table tennis, jogging, Tai Chi, etc.)	C. 21 to 30 minutes	C. Two to three times a month	B. Travel and outing D. Ball games H. Swimming I. Others	B. a little bit in line with me.	B. a little bit in line with me.	B. a little bit in line with me.	C. Consistent with my moderate intensity	D. Very much in line with me	C. Consistent with my moderate intensity	C. Consistent with my moderate intensity	B. a little bit in line with me.	B. a little bit in line with me.	D. Very much in line with me	D. Very much in line with me	D. Very much in line with me	B. a little bit in line with me.	B. a little bit in line with me.	A. Not at all.	Yes	Yes	Yes	Yes	Yes	Yes	Yes	Yes	Yes	Yes	Yes	Yes	Yes	Yes	Yes	Not sure	Not sure	Not sure	Not sure	Extremely inconsistent	Not sure	Conform
31	2024/6/28 23:42:26	318 seconds	WeChat	N/A	106	Female	18-20	Undergraduate study	A. Light exercise (such as walking, doing radio gymnastics, playing gateball, etc.)	B. 11 to 20 minutes	E. 1-2 times per week	F. Tai Chi, science of health preserving I. Other	B. a little bit in line with me.	D. Very much in line with me	A. Not at all.	D. Very much in line with me	D. Very much in line with me	B. a little bit in line with me.	C. Consistent with my moderate intensity	D. Very much in line with me	D. Very much in line with me	C. Consistent with my moderate intensity	C. Consistent with my moderate intensity	B. a little bit in line with me.	C. Consistent with my moderate intensity	C. Consistent with my moderate intensity	B. a little bit in line with me.	Yes	Yes	No	No	Yes	Yes	Yes	Yes	Yes	No	Yes	Yes	No	No	No	Conform	Conform	Conform	Not sure	Not sure	Conform	Conform
32	2024/6/28 23:42:33	433 seconds	WeChat	N/A	79	Male	21-23	I'm studying for a master's degree	D. High-intensity but not sustained exercise with shortness of breath and a lot of sweating (such as playing badminton, basketball, tennis, football, etc.)	E. More than 60 minutes	D. Approximately once a day	D. Ball games	A. Not at all.	A. Not at all.	A. Not at all.	A. Not at all.	A. Not at all.	A. Not at all.	A. Not at all.	B. a little bit in line with me.	E. Extremely in line with me	E. Extremely in line with me	A. Not at all.	A. Not at all.	A. Not at all.	B. a little bit in line with me.	E. Extremely in line with me	No	No	Yes	No	No	No	No	No	No	Yes	No	No	Yes	No	Yes	Conform	Conform	Not sure	Does not match	Does not match	Conform	Conform
33	2024/6/28 23:42:52	148 seconds	WeChat	N/A	116	Female	24-26	I'm studying for a master's degree	A. Light exercise (such as walking, doing radio gymnastics, playing gateball, etc.)	C. 21 to 30 minutes	C. 2 to 3 times a month	A. Walking and running	D. Very much in line with me	B. a little bit in line with me.	B. a little bit in line with me.	B. a little bit in line with me.	B. a little bit in line with me.	B. a little bit in line with me.	B. a little bit in line with me.	C. Consistent with my moderate intensity	E. Extremely in line with me	C. Consistent with my moderate intensity	E. Extremely in line with me	B. a little bit in line with me.	B. a little bit in line with me.	B. a little bit in line with me.	C. Consistent with my moderate intensity	Yes	Yes	No	Yes	Yes	Yes	Yes	Yes	Yes	Yes	Yes	Yes	Yes	Yes	Yes	Extremely in line	Extremely in line	Extremely in line	Extremely in line	Extremely in line	Extremely in line	Extremely in line
34	2024/6/28 23:42:52	128 seconds	WeChat	N/A	108	Female	24-26	I'm studying for a master's degree	D. High-intensity but not sustained exercise with shortness of breath and a lot of sweating (such as playing badminton, basketball, tennis, football, etc.)	D. 31 to 59 minutes	D. Approximately once a day	C. Dance Sport	B. a little bit in line with me.	A. Not at all.	B. a little bit in line with me.	D. Very much in line with me	D. Very much in line with me	C. Consistent with my moderate intensity	B. a little bit in line with me.	D. Very much in line with me	D. Very much in line with me	C. Consistent with my moderate intensity	D. Very much in line with me	C. Consistent with my moderate intensity	C. Consistent with my moderate intensity	C. Consistent with my moderate intensity	C. Consistent with my moderate intensity	Yes	Yes	No	No	Yes	Yes	Yes	Yes	Yes	Yes	Yes	Yes	Yes	Yes	Yes	Does not match	Not sure	Not sure	Conform	Conform	Conform	Conform
35	2024/6/28 23:43:29	127 seconds	WeChat	N/A	101	Female	18-20	Undergraduate study	A. Light exercise (such as walking, doing radio gymnastics, playing gateball, etc.)	C. 21 to 30 minutes	C. Two to three times a month	B. Travel, outing C. Sports dance G. Fitness equipment activities H. Swimming	A. Not at all.	A. Not at all.	C. Consistent with my moderate intensity	B. a little bit in line with me.	A. Not at all.	A. Not at all.	A. Not at all.	B. a little bit in line with me.	A. Not at all.	C. Consistent with my moderate intensity	A. Not at all.	B. a little bit in line with me.	A. Not at all.	B. a little bit in line with me.	B. a little bit in line with me.	Yes	Yes	No	Yes	Yes	Yes	Yes	Yes	Yes	Yes	Yes	Yes	Yes	Yes	Yes	Extremely in line	Extremely in line	Extremely in line	Extremely in line	Extremely in line	Extremely in line	Extremely in line
36	2024/6/28 23:43:37	159 seconds	WeChat	N/A	98	Male	21-23	Undergraduate study	D. High-intensity but not sustained exercise with shortness of breath and a lot of sweating (such as playing badminton, basketball, tennis, football, etc.)	E. More than 60 minutes	D. Approximately once a day	D. Ball games G. Exercise equipment activities	A. Not at all.	C. Consistent with my moderate intensity	C. Consistent with my moderate intensity	B. a little bit in line with me.	A. Not at all.	B. a little bit in line with me.	C. Consistent with my moderate intensity	B. a little bit in line with me.	E. Extremely in line with me	C. Consistent with my moderate intensity	A. Not at all.	D. Very much in line with me	C. Consistent with my moderate intensity	D. Very much in line with me	B. a little bit in line with me.	Yes	No	No	No	Yes	No	No	No	Yes	No	Yes	Yes	No	Yes	Yes	Conform	Not sure	Does not match	Conform	Not sure	Conform	Conform
37	2024/6/28 23:44:34	167 seconds	WeChat	N/A	101	Female	18-20	Undergraduate study	A. Light exercise (such as walking, doing radio gymnastics, playing gateball, etc.)	B. 11 to 20 minutes	C. Two to three times a month	I. Other	C. Consistent with my moderate intensity	C. Consistent with my moderate intensity	A. Not at all.	C. Consistent with my moderate intensity	C. Consistent with my moderate intensity	A. Not at all.	B. a little bit in line with me.	D. Very much in line with me	D. Very much in line with me	C. Consistent with my moderate intensity	B. a little bit in line with me.	B. a little bit in line with me.	D. Very much in line with me	C. Consistent with my moderate intensity	B. a little bit in line with me.	Yes	Yes	No	No	Yes	Yes	Yes	Yes	Yes	Yes	Yes	Yes	No	No	No	Conform	Conform	Not sure	Not sure	Not sure	Not sure	Conform
38	2024/6/28 23:44:56	292 seconds	WeChat	N/A	106	Female	21-23	I'm studying for a master's degree	D. High-intensity but not sustained exercise with shortness of breath and a lot of sweating (such as playing badminton, basketball, tennis, football, etc.)	D. 31 to 59 minutes	C. Two to three times a month	A. Walking, running B. Travel, outing D. Ball games	B. a little bit in line with me.	E. Extremely in line with me	A. Not at all.	D. Very much in line with me	D. Very much in line with me	C. Consistent with my moderate intensity	A. Not at all.	D. Very much in line with me	D. Very much in line with me	B. a little bit in line with me.	A. Not at all.	C. Consistent with my moderate intensity	B. a little bit in line with me.	D. Very much in line with me	A. Not at all.	Yes	Yes	No	No	Yes	Yes	Yes	Yes	Yes	Yes	Yes	Yes	No	No	No	Conform	Conform	Not sure	Does not match	Not sure	Conform	Not sure
39	2024/6/28 23:45:14	109 seconds	WeChat	N/A	84	Male	30-32	I'm studying for a master's degree	E. High-intensity and sustained exercise with shortness of breath and a lot of sweating (such as running, aerobics sets, swimming, etc.)	E. More than 60 minutes	B. Three to five times a week	G. Exercise machine activity	B. a little bit in line with me.	B. a little bit in line with me.	B. a little bit in line with me.	B. a little bit in line with me.	D. Very much in line with me	B. a little bit in line with me.	B. a little bit in line with me.	B. a little bit in line with me.	B. a little bit in line with me.	C. Consistent with my moderate intensity	C. Consistent with my moderate intensity	B. a little bit in line with me.	C. Consistent with my moderate intensity	B. a little bit in line with me.	B. a little bit in line with me.	Yes	No	Yes	No	No	No	Yes	Yes	Yes	Yes	Yes	Yes	Yes	Yes	Yes	Not sure	Not sure	Extremely inconsistent	Does not match	Extremely inconsistent	Extremely inconsistent	Does not match
40	2024/6/28 23:45:17	139 seconds	WeChat	N/A	103	Male	24-26	I'm studying for a master's degree	B. Low-intensity and low-tension sports (such as recreational volleyball, table tennis, jogging, Tai Chi, etc.)	E. More than 60 minutes	E. 1-2 times per week	A. Walking, running B. Travel, outing F. Tai Chi, science of health preserving G. Exercise equipment activities I. Others	E. Extremely in line with me	C. Consistent with my moderate intensity	C. Consistent with my moderate intensity	E. Extremely in line with me	D. Very much in line with me	B. a little bit in line with me.	B. a little bit in line with me.	A. Not at all.	A. Not at all.	A. Not at all.	E. Extremely in line with me	D. Very much in line with me	B. a little bit in line with me.	C. Consistent with my moderate intensity	B. a little bit in line with me.	Yes	Yes	Yes	No	Yes	No	No	Yes	Yes	No	Yes	Yes	No	No	No	Extremely inconsistent	Not sure	Not sure	Conform	Conform	Conform	Does not match
41	2024/6/28 23:45:53	64Seconds	WeChat	N/A	82	Male	24-26	I'm studying for a master's degree	A.Light sports (such as walking, doing radio gymnastics, playing gateball, etc.)	A.10Minutes or less	A.One month1Below the second	A.Walk, runE.Rope skipping	a.It doesn't match at all.	d.It fits me very well.	a.It doesn't match at all.	b.Matches me a little bit.	b.Matches me a little bit.	b.Matches me a little bit.	b.Matches me a little bit.	c.Consistent with my moderate intensity.	b.Matches me a little bit.	c.Consistent with my moderate intensity.	b.Matches me a little bit.	b.Matches me a little bit.	c.Consistent with my moderate intensity.	c.Consistent with my moderate intensity.	c.Consistent with my moderate intensity.	Yes	Yes	Yes	Yes	Yes	Yes	Yes	Yes	Yes	Yes	Yes	Yes	Yes	Yes	Yes	Extremely inconsistent	Does not match	Conform	Conform	Not sure	Extremely inconsistent	Does not match
42	2024/6/28 23:45:55	104 seconds	WeChat	N/A	110	Female	21-23	I'm studying for a master's degree	B. Low-intensity and low-tension sports (such as recreational volleyball, table tennis, jogging, Tai Chi, etc.)	D. 31 to 59 minutes	E. 1-2 times per week	A. Walking and running C. Sports dance G. Fitness equipment activities	B. a little bit in line with me.	C. Consistent with my moderate intensity	B. a little bit in line with me.	C. Consistent with my moderate intensity	C. Consistent with my moderate intensity	C. Consistent with my moderate intensity	C. Consistent with my moderate intensity	C. Consistent with my moderate intensity	C. Consistent with my moderate intensity	C. Consistent with my moderate intensity	C. Consistent with my moderate intensity	C. Consistent with my moderate intensity	C. Consistent with my moderate intensity	C. Consistent with my moderate intensity	C. Consistent with my moderate intensity	Yes	Yes	Yes	Yes	Yes	Yes	Yes	Yes	Yes	Yes	Yes	Yes	Yes	Yes	Yes	Conform	Conform	Not sure	Conform	Conform	Conform	Conform
43	2024/6/28 23:46:58	126 seconds	WeChat	N/A	107	Female	18-20	Undergraduate study	D. High-intensity but not sustained exercise with shortness of breath and a lot of sweating (such as playing badminton, basketball, tennis, football, etc.)	C. 21 to 30 minutes	E. 1-2 times per week	A. Walking and running D. Ball games	B. a little bit in line with me.	C. Consistent with my moderate intensity	C. Consistent with my moderate intensity	C. Consistent with my moderate intensity	C. Consistent with my moderate intensity	B. a little bit in line with me.	B. a little bit in line with me.	C. Consistent with my moderate intensity	D. Very much in line with me	C. Consistent with my moderate intensity	C. Consistent with my moderate intensity	C. Consistent with my moderate intensity	A. Not at all.	D. Very much in line with me	C. Consistent with my moderate intensity	Yes	Yes	No	No	Yes	Yes	Yes	Yes	Yes	Yes	Yes	Yes	No	Yes	No	Conform	Conform	Conform	Conform	Conform	Conform	Conform
44	2024/6/28 23:47:14	403 seconds	WeChat	N/A	98	Female	21-23	Undergraduate study	A. Light exercise (such as walking, doing radio gymnastics, playing gateball, etc.)	D. 31 to 59 minutes	E. 1-2 times per week	A. Walking and running D. Ball games H. Swimming I. Others	C. Consistent with my moderate intensity	D. Very much in line with me	C. Consistent with my moderate intensity	B. a little bit in line with me.	C. Consistent with my moderate intensity	B. a little bit in line with me.	B. a little bit in line with me.	C. Consistent with my moderate intensity	E. Extremely in line with me	A. Not at all.	D. Very much in line with me	B. a little bit in line with me.	B. a little bit in line with me.	B. a little bit in line with me.	B. a little bit in line with me.	Yes	No	Yes	Yes	No	No	No	Yes	No	No	No	Yes	Yes	Yes	Yes	Conform	Not sure	Does not match	Not sure	Does not match	Conform	Conform
45	2024/6/28 23:48:53	138 seconds	WeChat	N/A	94	Male	18-20	Undergraduate study	A. Light exercise (such as walking, doing radio gymnastics, playing gateball, etc.)	C. 21 to 30 minutes	C. Two to three times a month	A. Walking, running B. Travel, outing I. Others	A. Not at all.	B. a little bit in line with me.	C. Consistent with my moderate intensity	C. Consistent with my moderate intensity	B. a little bit in line with me.	D. Very much in line with me	C. Consistent with my moderate intensity	B. a little bit in line with me.	D. Very much in line with me	B. a little bit in line with me.	B. a little bit in line with me.	B. a little bit in line with me.	C. Consistent with my moderate intensity	C. Consistent with my moderate intensity	B. a little bit in line with me.	Yes	Yes	No	Yes	Yes	Yes	Yes	Yes	Yes	No	Yes	Yes	No	No	No	Conform	Conform	Not sure	Conform	Conform	Conform	Conform
46	2024/6/28 23:51:38	175 seconds	WeChat	N/A	100	Male	21-23	Undergraduate study	B. Low-intensity and low-tension sports (such as recreational volleyball, table tennis, jogging, Tai Chi, etc.)	C. 21 to 30 minutes	C. Two to three times a month	A. Walking, running F. Tai Chi, science of health preserving H. Swimming	C. Consistent with my moderate intensity	C. Consistent with my moderate intensity	A. Not at all.	C. Consistent with my moderate intensity	B. a little bit in line with me.	D. Very much in line with me	C. Consistent with my moderate intensity	D. Very much in line with me	D. Very much in line with me	A. Not at all.	C. Consistent with my moderate intensity	C. Consistent with my moderate intensity	C. Consistent with my moderate intensity	C. Consistent with my moderate intensity	A. Not at all.	Yes	Yes	No	No	Yes	Yes	Yes	Yes	Yes	No	Yes	Yes	No	No	No	Not sure	Not sure	Not sure	Not sure	Not sure	Not sure	Not sure
47	2024/6/28 23:54:13	191 seconds	WeChat	N/A	104	Female	21-23	I'm studying for a master's degree	E. High-intensity and sustained exercise with shortness of breath and a lot of sweating (such as running, aerobics sets, swimming, etc.)	D. 31 to 59 minutes	C. Two to three times a month	A. Walking and running C. Sports dance G. Fitness equipment activities	B. a little bit in line with me.	B. a little bit in line with me.	A. Not at all.	C. Consistent with my moderate intensity	B. a little bit in line with me.	B. a little bit in line with me.	E. Extremely in line with me	E. Extremely in line with me	E. Extremely in line with me	A. Not at all.	E. Extremely in line with me	E. Extremely in line with me	E. Extremely in line with me	E. Extremely in line with me	A. Not at all.	Yes	Yes	No	Yes	Yes	No	No	Yes	Yes	No	Yes	Yes	No	No	Yes	Not sure	Not sure	Extremely inconsistent	Extremely inconsistent	Extremely inconsistent	Not sure	Does not match
48	2024/6/28 23:56:08	550 seconds	WeChat	N/A	93	Female	21-23	Undergraduate study	B. Low-intensity and low-tension sports (such as recreational volleyball, table tennis, jogging, Tai Chi, etc.)	C. 21 to 30 minutes	C. 2 to 3 times a month	A. Walking and running	B. a little bit in line with me.	B. a little bit in line with me.	C. Consistent with my moderate intensity	D. Very much in line with me	B. a little bit in line with me.	D. Very much in line with me	D. Very much in line with me	E. Extremely in line with me	E. Extremely in line with me	B. a little bit in line with me.	C. Consistent with my moderate intensity	B. a little bit in line with me.	B. a little bit in line with me.	D. Very much in line with me	A. Not at all.	No	No	No	No	Yes	Yes	No	No	Yes	Yes	No	No	No	No	Yes	Conform	Conform	Not sure	Not sure	Not sure	Conform	Does not match
49	2024/6/28 23:56:38	182 seconds	WeChat	N/A	100	Female	21-23	Undergraduate study	B. Low-intensity and low-tension sports (such as recreational volleyball, table tennis, jogging, Tai Chi, etc.)	B. 11 to 20 minutes	A. Less than once A month	A. Walking, running B. Travel, outing F. Tai Chi, science of health preserving H. Swimming	C. Consistent with my moderate intensity	B. a little bit in line with me.	B. a little bit in line with me.	B. a little bit in line with me.	C. Consistent with my moderate intensity	C. Consistent with my moderate intensity	B. a little bit in line with me.	D. Very much in line with me	E. Extremely in line with me	C. Consistent with my moderate intensity	B. a little bit in line with me.	D. Very much in line with me	E. Extremely in line with me	E. Extremely in line with me	C. Consistent with my moderate intensity	Yes	Yes	No	Yes	Yes	Yes	Yes	Yes	Yes	Yes	Yes	Yes	No	No	Yes	Not sure	Not sure	Extremely inconsistent	Conform	Extremely in line	Extremely in line	Does not match
50	2024/6/28 23:59:38	150 seconds	WeChat	N/A	97	Male	21-23	I'm studying for a master's degree	A. Light exercise (such as walking, doing radio gymnastics, playing gateball, etc.)	A. Less than 10 minutes	E. 1-2 times per week	D. Ball games E. Rope skipping	A. Not at all.	C. Consistent with my moderate intensity	C. Consistent with my moderate intensity	B. a little bit in line with me.	B. a little bit in line with me.	C. Consistent with my moderate intensity	D. Very much in line with me	C. Consistent with my moderate intensity	C. Consistent with my moderate intensity	B. a little bit in line with me.	C. Consistent with my moderate intensity	B. a little bit in line with me.	C. Consistent with my moderate intensity	D. Very much in line with me	C. Consistent with my moderate intensity	No	No	Yes	No	No	No	No	No	No	No	No	No	Yes	No	Yes	Conform	Conform	Conform	Conform	Conform	Extremely in line	Extremely in line
51	2024/6/29 0:04:29	114 seconds	WeChat	N/A	95	Male	24-26	I'm studying for a master's degree	A. Light exercise (such as walking, doing radio gymnastics, playing gateball, etc.)	D. 31 to 59 minutes	B. Three to five times a week	A. Walking and running I. Others	B. a little bit in line with me.	B. a little bit in line with me.	B. a little bit in line with me.	B. a little bit in line with me.	B. a little bit in line with me.	B. a little bit in line with me.	B. a little bit in line with me.	B. a little bit in line with me.	B. a little bit in line with me.	B. a little bit in line with me.	B. a little bit in line with me.	B. a little bit in line with me.	B. a little bit in line with me.	B. a little bit in line with me.	B. a little bit in line with me.	Yes	Yes	No	No	Yes	Yes	Yes	Yes	Yes	No	Yes	Yes	No	Yes	Yes	Conform	Conform	Conform	Conform	Conform	Conform	Conform
52	2024/6/29 0:08:16	192 seconds	WeChat	N/A	107	Female	21-23	Undergraduate study	B. Low-intensity and low-tension sports (such as recreational volleyball, table tennis, jogging, Tai Chi, etc.)	C. 21 to 30 minutes	E. 1-2 times per week	C. Dance Sport	C. Consistent with my moderate intensity	D. Very much in line with me	C. Consistent with my moderate intensity	B. a little bit in line with me.	B. a little bit in line with me.	B. a little bit in line with me.	A. Not at all.	E. Extremely in line with me	E. Extremely in line with me	B. a little bit in line with me.	B. a little bit in line with me.	E. Extremely in line with me	B. a little bit in line with me.	E. Extremely in line with me	A. Not at all.	Yes	Yes	No	No	Yes	Yes	Yes	Yes	Yes	Yes	Yes	Yes	No	No	No	Conform	Conform	Conform	Conform	Conform	Not sure	Not sure
53	2024/6/29 0:24:44	229 seconds	WeChat	N/A	107	Male	24-26	I'm studying for a master's degree	D. High-intensity but not sustained exercise with shortness of breath and a lot of sweating (such as playing badminton, basketball, tennis, football, etc.)	E. More than 60 minutes	E. 1-2 times per week	B. Tourism and outing D. Ball games	B. a little bit in line with me.	C. Consistent with my moderate intensity	D. Very much in line with me	C. Consistent with my moderate intensity	C. Consistent with my moderate intensity	C. Consistent with my moderate intensity	C. Consistent with my moderate intensity	D. Very much in line with me	D. Very much in line with me	B. a little bit in line with me.	A. Not at all.	B. a little bit in line with me.	C. Consistent with my moderate intensity	D. Very much in line with me	B. a little bit in line with me.	Yes	Yes	No	Yes	Yes	Yes	Yes	Yes	No	No	Yes	Yes	No	No	No	Extremely in line	Extremely in line	Not sure	Not sure	Does not match	Extremely in line	Extremely in line
54	2024/6/29 0:27:32	185 seconds	WeChat	N/A	104	Female	21-23	Undergraduate study	E. High-intensity and sustained exercise with shortness of breath and a lot of sweating (such as running, aerobics sets, swimming, etc.)	E. More than 60 minutes	E. 1-2 times per week	A. Walking, running B. Travel, outing H. Swimming	A. Not at all.	A. Not at all.	C. Consistent with my moderate intensity	E. Extremely in line with me	B. a little bit in line with me.	C. Consistent with my moderate intensity	C. Consistent with my moderate intensity	E. Extremely in line with me	E. Extremely in line with me	A. Not at all.	C. Consistent with my moderate intensity	C. Consistent with my moderate intensity	A. Not at all.	D. Very much in line with me	A. Not at all.	Yes	Yes	No	Yes	Yes	Yes	Yes	Yes	Yes	Yes	Yes	Yes	No	Yes	No	Conform	Not sure	Does not match	Does not match	Does not match	Not sure	Does not match
55	2024/6/29 0:34:38	138 seconds	WeChat	N/A	96	Female	21-23	I'm studying for a master's degree	A. Light exercise (such as walking, doing radio gymnastics, playing gateball, etc.)	C. 21 to 30 minutes	C. Two to three times a month	A. Walking and running	C. Consistent with my moderate intensity	D. Very much in line with me	B. a little bit in line with me.	D. Very much in line with me	C. Consistent with my moderate intensity	C. Consistent with my moderate intensity	B. a little bit in line with me.	D. Very much in line with me	C. Consistent with my moderate intensity	C. Consistent with my moderate intensity	B. a little bit in line with me.	B. a little bit in line with me.	C. Consistent with my moderate intensity	C. Consistent with my moderate intensity	B. a little bit in line with me.	Yes	Yes	No	No	Yes	Yes	Yes	Yes	Yes	Yes	Yes	Yes	No	No	No	Conform	Not sure	Not sure	Does not match	Not sure	Conform	Not sure
56	2024/6/29 0:46:13	137 seconds	WeChat	N/A	117	Female	24-26	I'm studying for a master's degree	E. High-intensity and sustained exercise with shortness of breath and a lot of sweating (such as running, aerobics sets, swimming, etc.)	D. 31 to 59 minutes	B. Three to five times a week	H. Swimming	C. Consistent with my moderate intensity	D. Very much in line with me	C. Consistent with my moderate intensity	C. Consistent with my moderate intensity	C. Consistent with my moderate intensity	C. Consistent with my moderate intensity	C. Consistent with my moderate intensity	C. Consistent with my moderate intensity	C. Consistent with my moderate intensity	C. Consistent with my moderate intensity	C. Consistent with my moderate intensity	D. Very much in line with me	C. Consistent with my moderate intensity	D. Very much in line with me	B. a little bit in line with me.	Yes	Yes	No	No	Yes	No	Yes	Yes	Yes	Yes	Yes	Yes	Yes	No	Yes	Extremely in line	Conform	Conform	Conform	Extremely in line	Extremely in line	Extremely in line
57	2024/6/29 0:48:43	199 seconds	WeChat	N/A	99	Female	18-20	Undergraduate study	B. Low-intensity and low-tension sports (such as recreational volleyball, table tennis, jogging, Tai Chi, etc.)	C. 21 to 30 minutes	C. Two to three times a month	A. Walking and running D. Ball games	B. a little bit in line with me.	C. Consistent with my moderate intensity	B. a little bit in line with me.	C. Consistent with my moderate intensity	C. Consistent with my moderate intensity	C. Consistent with my moderate intensity	C. Consistent with my moderate intensity	C. Consistent with my moderate intensity	D. Very much in line with me	B. a little bit in line with me.	B. a little bit in line with me.	C. Consistent with my moderate intensity	B. a little bit in line with me.	D. Very much in line with me	A. Not at all.	Yes	No	No	Yes	Yes	Yes	No	Yes	Yes	No	Yes	Yes	Yes	No	Yes	Conform	Conform	Not sure	Not sure	Not sure	Conform	Not sure
58	2024/6/29 0:49:31	253 seconds	WeChat	N/A	84	Female	24-26	I'm studying for a master's degree	C. Moderate intensity and more intense and lasting exercise (such as cycling, running, playing table tennis, etc.)	C. 21 to 30 minutes	A. Less than once A month	B. Travel and outing C. Sports dance E. Skipping rope	A. Not at all.	A. Not at all.	B. a little bit in line with me.	B. a little bit in line with me.	A. Not at all.	B. a little bit in line with me.	A. Not at all.	C. Consistent with my moderate intensity	D. Very much in line with me	B. a little bit in line with me.	B. a little bit in line with me.	A. Not at all.	A. Not at all.	E. Extremely in line with me	B. a little bit in line with me.	Yes	Yes	No	Yes	Yes	Yes	No	Yes	Yes	No	Yes	Yes	No	No	No	Not sure	Not sure	Not sure	Does not match	Not sure	Does not match	Not sure
59	2024/6/29 1:06:58	265 seconds	WeChat	N/A	111	Male	21-23	Undergraduate study	C. Moderate intensity and more intense and lasting exercise (such as cycling, running, playing table tennis, etc.)	D. 31 to 59 minutes	C. 2 to 3 times a month	A. Walking, running B. Travel, outing D. Ball games F. Tai Chi, science of health preserving.	D. Very much in line with me	D. Very much in line with me	B. a little bit in line with me.	C. Consistent with my moderate intensity	C. Consistent with my moderate intensity	C. Consistent with my moderate intensity	C. Consistent with my moderate intensity	D. Very much in line with me	D. Very much in line with me	B. a little bit in line with me.	D. Very much in line with me	D. Very much in line with me	D. Very much in line with me	D. Very much in line with me	A. Not at all.	No	Yes	No	No	No	No	No	No	Yes	Yes	Yes	Yes	Yes	No	Yes	Conform	Not sure	Not sure	Not sure	Conform	Conform	Conform
60	2024/6/29 4:24:56	380 seconds	WeChat	N/A	86	Male	24-26	I'm studying for a master's degree	B. Low-intensity and low-tension sports (such as recreational volleyball, table tennis, jogging, Tai Chi, etc.)	C. 21 to 30 minutes	C. Two to three times a month	D. Ball games E. Rope skipping	B. a little bit in line with me.	B. a little bit in line with me.	A. Not at all.	C. Consistent with my moderate intensity	A. Not at all.	B. a little bit in line with me.	A. Not at all.	B. a little bit in line with me.	C. Consistent with my moderate intensity	C. Consistent with my moderate intensity	C. Consistent with my moderate intensity	B. a little bit in line with me.	B. a little bit in line with me.	C. Consistent with my moderate intensity	C. Consistent with my moderate intensity	No	No	No	No	No	No	No	Yes	Yes	No	Yes	Yes	No	No	Yes	Conform	Conform	Does not match	Not sure	Not sure	Conform	Conform
61	2024/6/29 5:32:30	129 seconds	WeChat	N/A	99	Female	21-23	I'm studying for a master's degree	A. Light exercise (such as walking, doing radio gymnastics, playing gateball, etc.)	B. 11 to 20 minutes	B. Three to five times a week	B. Tourism and outing D. Ball games	C. Consistent with my moderate intensity	C. Consistent with my moderate intensity	A. Not at all.	D. Very much in line with me	E. Extremely in line with me	E. Extremely in line with me	E. Extremely in line with me	D. Very much in line with me	A. Not at all.	D. Very much in line with me	E. Extremely in line with me	D. Very much in line with me	E. Extremely in line with me	D. Very much in line with me	C. Consistent with my moderate intensity	Yes	No	No	Yes	Yes	Yes	No	No	No	Yes	No	Yes	No	Yes	Yes	Not sure	Does not match	Conform	Not sure	Not sure	Conform	Not sure
62	2024/6/29 8:07:14	183 seconds	WeChat	N/A	77	Female	24-26	I'm studying for a master's degree	C. Moderate intensity and more intense and lasting exercise (such as cycling, running, playing table tennis, etc.)	E. More than 60 minutes	B. Three to five times a week	G. Exercise Machine Activities I. Other	A. Not at all.	A. Not at all.	D. Very much in line with me	A. Not at all.	A. Not at all.	A. Not at all.	A. Not at all.	C. Consistent with my moderate intensity	B. a little bit in line with me.	D. Very much in line with me	A. Not at all.	A. Not at all.	A. Not at all.	A. Not at all.	D. Very much in line with me	Yes	Yes	No	Yes	Yes	Yes	No	No	Yes	Yes	Yes	Yes	No	No	No	Conform	Not sure	Conform	Not sure	Not sure	Not sure	Not sure
63	2024/6/29 9:15:59	264 seconds	WeChat	N/A	83	Male	24-26	Undergraduate study	B. Low-intensity and low-tension sports (such as recreational volleyball, table tennis, jogging, Tai Chi, etc.)	C. 21 to 30 minutes	A. Less than once A month	A. Walking and running D. Ball games	B. a little bit in line with me.	D. Very much in line with me	D. Very much in line with me	B. a little bit in line with me.	B. a little bit in line with me.	B. a little bit in line with me.	A. Not at all.	D. Very much in line with me	B. a little bit in line with me.	B. a little bit in line with me.	C. Consistent with my moderate intensity	C. Consistent with my moderate intensity	B. a little bit in line with me.	B. a little bit in line with me.	B. a little bit in line with me.	Yes	No	No	No	Yes	Yes	Yes	Yes	No	Yes	Yes	Yes	No	Yes	No	Conform	Not sure	Does not match	Does not match	Does not match	Does not match	Not sure
64	2024/6/29 10:25:16	1272 seconds	WeChat	N/A	96	Female	21-23	Undergraduate study	B. Low-intensity and low-tension sports (such as recreational volleyball, table tennis, jogging, Tai Chi, etc.)	C. 21 to 30 minutes	C. Two to three times a month	A. Walking, running B. Travel, outing D. Ball games E. Skipping rope H. Swimming I. Others	B. a little bit in line with me.	B. a little bit in line with me.	C. Consistent with my moderate intensity	B. a little bit in line with me.	B. a little bit in line with me.	B. a little bit in line with me.	A. Not at all.	B. a little bit in line with me.	C. Consistent with my moderate intensity	B. a little bit in line with me.	B. a little bit in line with me.	B. a little bit in line with me.	C. Consistent with my moderate intensity	C. Consistent with my moderate intensity	A. Not at all.	No	Yes	No	Yes	Yes	Yes	Yes	Yes	Yes	No	Yes	Yes	No	No	No	Conform	Conform	Not sure	Conform	Conform	Conform	Conform
65	2024/6/29 10:37:29	182 seconds	WeChat	N/A	84	Female	18-20	Undergraduate study	A. Light exercise (such as walking, doing radio gymnastics, playing gateball, etc.)	D. 31 to 59 minutes	C. Two to three times a month	A. Walking and running C. Sports dance	A. Not at all.	B. a little bit in line with me.	D. Very much in line with me	A. Not at all.	B. a little bit in line with me.	B. a little bit in line with me.	B. a little bit in line with me.	B. a little bit in line with me.	A. Not at all.	A. Not at all.	C. Consistent with my moderate intensity	A. Not at all.	B. a little bit in line with me.	B. a little bit in line with me.	B. a little bit in line with me.	No	No	Yes	No	Yes	No	No	No	No	No	Yes	No	No	No	Yes	Conform	Conform	Not sure	Conform	Conform	Conform	Conform
66	2024/6/29 11:26:02	242 seconds	WeChat	N/A	103	Male	21-23	Undergraduate study	D. High-intensity but not sustained exercise with shortness of breath and a lot of sweating (such as playing badminton, basketball, tennis, football, etc.)	C. 21 to 30 minutes	C. Two to three times a month	D. Ball games	B. a little bit in line with me.	B. a little bit in line with me.	E. Extremely in line with me	E. Extremely in line with me	B. a little bit in line with me.	B. a little bit in line with me.	A. Not at all.	D. Very much in line with me	E. Extremely in line with me	A. Not at all.	B. a little bit in line with me.	D. Very much in line with me	C. Consistent with my moderate intensity	D. Very much in line with me	C. Consistent with my moderate intensity	Yes	Yes	No	No	Yes	Yes	Yes	Yes	Yes	Yes	Yes	Yes	No	No	Yes	Conform	Extremely in line	Not sure	Does not match	Not sure	Conform	Not sure
67	2024/6/29 11:26:56	240 seconds	WeChat	N/A	103	Male	21-23	Undergraduate study	B. Low-intensity and low-tension sports (such as recreational volleyball, table tennis, jogging, Tai Chi, etc.)	D. 31 to 59 minutes	E. 1-2 times per week	A. Walking, running D. Ball games E. Skipping F. Tai Chi, science of health preserving G. Fitness equipment activities	B. a little bit in line with me.	C. Consistent with my moderate intensity	B. a little bit in line with me.	D. Very much in line with me	C. Consistent with my moderate intensity	B. a little bit in line with me.	B. a little bit in line with me.	D. Very much in line with me	D. Very much in line with me	B. a little bit in line with me.	D. Very much in line with me	E. Extremely in line with me	C. Consistent with my moderate intensity	E. Extremely in line with me	B. a little bit in line with me.	Yes	Yes	No	Yes	Yes	Yes	Yes	Yes	Yes	No	Yes	Yes	No	No	No	Conform	Conform	Extremely inconsistent	Extremely inconsistent	Does not match	Conform	Not sure
68	2024/6/29 11:29:30	192 seconds	WeChat	N/A	100	Female	21-23	I'm studying for a master's degree	A. Light exercise (such as walking, doing radio gymnastics, playing gateball, etc.)	D. 31 to 59 minutes	B. Three to five times a week	A. Walking and running B. Travel and outing	B. a little bit in line with me.	B. a little bit in line with me.	D. Very much in line with me	D. Very much in line with me	C. Consistent with my moderate intensity	D. Very much in line with me	C. Consistent with my moderate intensity	C. Consistent with my moderate intensity	E. Extremely in line with me	C. Consistent with my moderate intensity	B. a little bit in line with me.	C. Consistent with my moderate intensity	B. a little bit in line with me.	C. Consistent with my moderate intensity	B. a little bit in line with me.	Yes	Yes	Yes	No	Yes	Yes	Yes	Yes	Yes	No	Yes	Yes	No	No	No	Conform	Conform	Conform	Conform	Conform	Conform	Conform
69	2024/6/29 11:30:52	366 seconds	WeChat	N/A	104	Female	18-20	Undergraduate study	D. High-intensity but not sustained exercise with shortness of breath and a lot of sweating (such as playing badminton, basketball, tennis, football, etc.)	C. 21 to 30 minutes	B. Three to five times a week	C. Dance Sport	A. Not at all.	C. Consistent with my moderate intensity	B. a little bit in line with me.	E. Extremely in line with me	C. Consistent with my moderate intensity	C. Consistent with my moderate intensity	C. Consistent with my moderate intensity	E. Extremely in line with me	D. Very much in line with me	B. a little bit in line with me.	D. Very much in line with me	D. Very much in line with me	D. Very much in line with me	E. Extremely in line with me	B. a little bit in line with me.	Yes	No	No	No	No	No	Yes	Yes	No	No	Yes	Yes	Yes	No	No	Conform	Not sure	Does not match	Does not match	Conform	Conform	Not sure
70	2024/6/29 11:32:31	128 seconds	WeChat	N/A	97	Male	21-23	Undergraduate study	A. Light exercise (such as walking, doing radio gymnastics, playing gateball, etc.)	C. 21 to 30 minutes	E. 1-2 times per week	G. Exercise Machine Activities I. Other	C. Consistent with my moderate intensity	C. Consistent with my moderate intensity	B. a little bit in line with me.	B. a little bit in line with me.	C. Consistent with my moderate intensity	B. a little bit in line with me.	B. a little bit in line with me.	B. a little bit in line with me.	C. Consistent with my moderate intensity	B. a little bit in line with me.	B. a little bit in line with me.	C. Consistent with my moderate intensity	C. Consistent with my moderate intensity	B. a little bit in line with me.	A. Not at all.	Yes	No	No	No	Yes	No	No	No	No	Yes	Yes	Yes	No	No	No	Conform	Conform	Not sure	Conform	Conform	Conform	Conform
71	2024/6/29 11:34:07	155 seconds	WeChat	N/A	101	Female	21-23	Undergraduate study	A. Light exercise (such as walking, doing radio gymnastics, playing gateball, etc.)	C. 21 to 30 minutes	C. 2 to 3 times a month	A. Walking, running F. Tai Chi, science of health preserving H. Swimming	C. Consistent with my moderate intensity	C. Consistent with my moderate intensity	B. a little bit in line with me.	A. Not at all.	A. Not at all.	A. Not at all.	A. Not at all.	B. a little bit in line with me.	D. Very much in line with me	C. Consistent with my moderate intensity	C. Consistent with my moderate intensity	C. Consistent with my moderate intensity	C. Consistent with my moderate intensity	C. Consistent with my moderate intensity	C. Consistent with my moderate intensity	Yes	Yes	No	Yes	Yes	Yes	Yes	Yes	Yes	Yes	Yes	Yes	Yes	No	No	Conform	Conform	Conform	Conform	Conform	Conform	Conform
72	2024/6/29 11:34:46	191 seconds	WeChat	N/A	106	Male	21-23	Undergraduate study	B. Low-intensity and low-tension sports (such as recreational volleyball, table tennis, jogging, Tai Chi, etc.)	B. 11 to 20 minutes	C. Two to three times a month	A. Walking and running D. Ball games H. Swimming	D. Very much in line with me	D. Very much in line with me	C. Consistent with my moderate intensity	B. a little bit in line with me.	B. a little bit in line with me.	C. Consistent with my moderate intensity	B. a little bit in line with me.	D. Very much in line with me	E. Extremely in line with me	B. a little bit in line with me.	B. a little bit in line with me.	C. Consistent with my moderate intensity	C. Consistent with my moderate intensity	B. a little bit in line with me.	B. a little bit in line with me.	Yes	Yes	No	No	Yes	Yes	No	Yes	No	Yes	Yes	Yes	Yes	No	No	Conform	Conform	Not sure	Conform	Extremely in line	Extremely in line	Extremely in line
73	2024/6/29 12:11:14	657 seconds	WeChat	N/A	94	Female	21-23	Undergraduate study	A. Light exercise (such as walking, doing radio gymnastics, playing gateball, etc.)	C. 21 to 30 minutes	E. 1-2 times per week	A. Walking and running F. Tai Chi and science of health preserving.	B. a little bit in line with me.	B. a little bit in line with me.	C. Consistent with my moderate intensity	B. a little bit in line with me.	B. a little bit in line with me.	C. Consistent with my moderate intensity	A. Not at all.	C. Consistent with my moderate intensity	D. Very much in line with me	D. Very much in line with me	B. a little bit in line with me.	B. a little bit in line with me.	B. a little bit in line with me.	C. Consistent with my moderate intensity	B. a little bit in line with me.	Yes	Yes	No	Yes	Yes	Yes	Yes	Yes	Yes	Yes	Yes	Yes	No	No	No	Conform	Conform	Conform	Conform	Conform	Not sure	Conform
74	2024/6/29 12:32:40	110 seconds	WeChat	N/A	99	Male	18-20	Undergraduate study	B. Low-intensity and low-tension sports (such as recreational volleyball, table tennis, jogging, Tai Chi, etc.)	B. 11 to 20 minutes	C. Two to three times a month	A. Walking and running I. Others	A. Not at all.	C. Consistent with my moderate intensity	B. a little bit in line with me.	C. Consistent with my moderate intensity	C. Consistent with my moderate intensity	C. Consistent with my moderate intensity	C. Consistent with my moderate intensity	C. Consistent with my moderate intensity	E. Extremely in line with me	E. Extremely in line with me	E. Extremely in line with me	E. Extremely in line with me	C. Consistent with my moderate intensity	E. Extremely in line with me	C. Consistent with my moderate intensity	Yes	Yes	No	Yes	Yes	Yes	No	Yes	Yes	Yes	Yes	Yes	No	No	Yes	Conform	Not sure	Not sure	Not sure	Not sure	Not sure	Not sure
75	2024/6/29 13:19:06	98 seconds	WeChat	N/A	116	Male	21-23	Undergraduate study	A. Light exercise (such as walking, doing radio gymnastics, playing gateball, etc.)	B. 11 to 20 minutes	B. Three to five times a week	A. Walking and running D. Ball games G. Fitness equipment activities	E. Extremely in line with me	E. Extremely in line with me	B. a little bit in line with me.	E. Extremely in line with me	E. Extremely in line with me	E. Extremely in line with me	E. Extremely in line with me	E. Extremely in line with me	E. Extremely in line with me	E. Extremely in line with me	E. Extremely in line with me	D. Very much in line with me	D. Very much in line with me	E. Extremely in line with me	C. Consistent with my moderate intensity	No	No	No	Yes	Yes	Yes	No	Yes	Yes	Yes	No	Yes	Yes	Yes	Yes	Conform	Conform	Not sure	Not sure	Conform	Conform	Extremely in line
76	2024/6/29 13:37:24	140 seconds	Mobile submission	Direct access	101	Female	18-20	Undergraduate study	B. Low-intensity and low-tension sports (such as recreational volleyball, table tennis, jogging, Tai Chi, etc.)	E. More than 60 minutes	E. 1-2 times per week	A. Walking and running D. Ball games	B. a little bit in line with me.	C. Consistent with my moderate intensity	C. Consistent with my moderate intensity	B. a little bit in line with me.	B. a little bit in line with me.	D. Very much in line with me	A. Not at all.	C. Consistent with my moderate intensity	D. Very much in line with me	C. Consistent with my moderate intensity	C. Consistent with my moderate intensity	B. a little bit in line with me.	C. Consistent with my moderate intensity	C. Consistent with my moderate intensity	B. a little bit in line with me.	Yes	Yes	No	No	Yes	Yes	Yes	Yes	Yes	Yes	Yes	Yes	No	No	Yes	Conform	Conform	Not sure	Conform	Conform	Conform	Conform
77	2024/6/29 14:35:02	150 seconds	WeChat	N/A	101	Male	21-23	Undergraduate study	C. Moderate intensity and more intense and lasting exercise (such as cycling, running, playing table tennis, etc.)	D. 31 to 59 minutes	C. Two to three times a month	A. Walking and running	B. a little bit in line with me.	B. a little bit in line with me.	D. Very much in line with me	B. a little bit in line with me.	B. a little bit in line with me.	B. a little bit in line with me.	B. a little bit in line with me.	D. Very much in line with me	B. a little bit in line with me.	B. a little bit in line with me.	B. a little bit in line with me.	B. a little bit in line with me.	B. a little bit in line with me.	C. Consistent with my moderate intensity	B. a little bit in line with me.	Yes	Yes	No	Yes	Yes	Yes	Yes	Yes	Yes	No	Yes	Yes	No	No	No	Extremely in line	Extremely in line	Extremely in line	Conform	Not sure	Conform	Conform
78	2024/6/29 15:37:54	168 seconds	WeChat	N/A	80	Male	18-20	Undergraduate study	A. Light exercise (such as walking, doing radio gymnastics, playing gateball, etc.)	A. Less than 10 minutes	B. Three to five times a week	A. Walking and running	B. a little bit in line with me.	B. a little bit in line with me.	B. a little bit in line with me.	B. a little bit in line with me.	B. a little bit in line with me.	C. Consistent with my moderate intensity	B. a little bit in line with me.	B. a little bit in line with me.	C. Consistent with my moderate intensity	B. a little bit in line with me.	B. a little bit in line with me.	B. a little bit in line with me.	B. a little bit in line with me.	B. a little bit in line with me.	B. a little bit in line with me.	Yes	Yes	No	No	Yes	No	No	Yes	Yes	No	Yes	Yes	No	Yes	No	Not sure	Not sure	Not sure	Not sure	Not sure	Not sure	Not sure
79	2024/6/29 15:43:12	135 seconds	WeChat	N/A	103	Female	18-20	Undergraduate study	B. Low-intensity and low-tension sports (such as recreational volleyball, table tennis, jogging, Tai Chi, etc.)	B. 11 to 20 minutes	C. Two to three times a month	A. Walking and running E. Skipping rope	E. Extremely in line with me	E. Extremely in line with me	A. Not at all.	E. Extremely in line with me	E. Extremely in line with me	A. Not at all.	B. a little bit in line with me.	E. Extremely in line with me	E. Extremely in line with me	A. Not at all.	E. Extremely in line with me	E. Extremely in line with me	E. Extremely in line with me	E. Extremely in line with me	A. Not at all.	No	No	Yes	No	No	No	No	No	No	Yes	No	No	Yes	No	Yes	Not sure	Does not match	Extremely inconsistent	Not sure	Extremely inconsistent	Does not match	Extremely inconsistent
80	2024/6/30 13:26:50	160 seconds	WeChat	N/A	93	Female	18-20	Undergraduate study	B. Low-intensity and low-tension sports (such as recreational volleyball, table tennis, jogging, Tai Chi, etc.)	D. 31 to 59 minutes	C. Two to three times a month	A. Walking, running B. Travel, outing D. Ball games G. Fitness equipment activities	C. Consistent with my moderate intensity	B. a little bit in line with me.	B. a little bit in line with me.	B. a little bit in line with me.	B. a little bit in line with me.	B. a little bit in line with me.	B. a little bit in line with me.	B. a little bit in line with me.	B. a little bit in line with me.	B. a little bit in line with me.	B. a little bit in line with me.	B. a little bit in line with me.	B. a little bit in line with me.	B. a little bit in line with me.	B. a little bit in line with me.	Yes	Yes	Yes	No	Yes	No	Yes	Yes	Yes	No	Yes	Yes	Yes	No	Yes	Not sure	Conform	Not sure	Conform	Conform	Conform	Not sure
81	2024/6/30 13:27:08	131 seconds	WeChat	N/A	99	Female	18-20	Undergraduate study	C. Moderate intensity and more intense and lasting exercise (such as cycling, running, playing table tennis, etc.)	C. 21 to 30 minutes	E. 1-2 times per week	A. Walking, running B. Travel, outing E. Skipping rope H. Swimming	B. a little bit in line with me.	B. a little bit in line with me.	D. Very much in line with me	C. Consistent with my moderate intensity	B. a little bit in line with me.	A. Not at all.	C. Consistent with my moderate intensity	B. a little bit in line with me.	E. Extremely in line with me	C. Consistent with my moderate intensity	A. Not at all.	B. a little bit in line with me.	B. a little bit in line with me.	B. a little bit in line with me.	C. Consistent with my moderate intensity	Yes	Yes	No	Yes	Yes	Yes	Yes	Yes	Yes	No	Yes	Yes	No	No	No	Conform	Conform	Conform	Conform	Conform	Conform	Conform
82	2024/6/30 20:11:04	113 seconds	Mobile submission	Direct access	120	Male	18-20	Undergraduate study	B. Low-intensity and low-tension sports (such as recreational volleyball, table tennis, jogging, Tai Chi, etc.)	B. 11 to 20 minutes	E. 1-2 times per week	A. Walking and running E. Skipping rope	B. a little bit in line with me.	E. Extremely in line with me	A. Not at all.	C. Consistent with my moderate intensity	E. Extremely in line with me	E. Extremely in line with me	E. Extremely in line with me	E. Extremely in line with me	E. Extremely in line with me	E. Extremely in line with me	E. Extremely in line with me	E. Extremely in line with me	E. Extremely in line with me	E. Extremely in line with me	E. Extremely in line with me	Yes	Yes	Yes	Yes	Yes	Yes	Yes	Yes	Yes	Yes	Yes	Yes	No	No	Yes	Extremely in line	Extremely in line	Conform	Conform	Conform	Conform	Conform
83	2024/6/30 20:11:07	149 seconds	Mobile submission	Direct access	106	Female	18-20	Undergraduate study	B. Low-intensity and low-tension sports (such as recreational volleyball, table tennis, jogging, Tai Chi, etc.)	C. 21 to 30 minutes	C. Two to three times a month	D. Ball games E. Rope skipping	B. a little bit in line with me.	C. Consistent with my moderate intensity	B. a little bit in line with me.	D. Very much in line with me	D. Very much in line with me	C. Consistent with my moderate intensity	C. Consistent with my moderate intensity	C. Consistent with my moderate intensity	C. Consistent with my moderate intensity	C. Consistent with my moderate intensity	C. Consistent with my moderate intensity	C. Consistent with my moderate intensity	D. Very much in line with me	D. Very much in line with me	C. Consistent with my moderate intensity	Yes	Yes	No	No	Yes	Yes	No	Yes	Yes	Yes	Yes	Yes	No	No	No	Conform	Conform	Conform	Conform	Conform	Conform	Conform
84	2024/6/30 20:11:12	188 seconds	Mobile submission	Direct access	99	Male	18-20	Undergraduate study	B. Low-intensity and low-tension sports (such as recreational volleyball, table tennis, jogging, Tai Chi, etc.)	C. 21 to 30 minutes	E. 1-2 times per week	A. Walking, running B. Travel, outing C. Sports dance D. Ball games F. Tai Chi, science of health preserving G. Fitness equipment activities	B. a little bit in line with me.	B. a little bit in line with me.	D. Very much in line with me	E. Extremely in line with me	B. a little bit in line with me.	D. Very much in line with me	B. a little bit in line with me.	E. Extremely in line with me	E. Extremely in line with me	C. Consistent with my moderate intensity	C. Consistent with my moderate intensity	D. Very much in line with me	C. Consistent with my moderate intensity	D. Very much in line with me	C. Consistent with my moderate intensity	Yes	Yes	Yes	No	No	No	No	No	No	Yes	Yes	No	Yes	No	Yes	Conform	Conform	Does not match	Not sure	Not sure	Conform	Conform
85	2024/6/30 20:14:37	118 seconds	Mobile submission	Direct access	94	Female	18-20	Undergraduate study	B. Low-intensity and low-tension sports (such as recreational volleyball, table tennis, jogging, Tai Chi, etc.)	C. 21 to 30 minutes	C. 2 to 3 times a month	A. Walking and running D. Ball games E. Skipping rope	B. a little bit in line with me.	B. a little bit in line with me.	B. a little bit in line with me.	C. Consistent with my moderate intensity	A. Not at all.	B. a little bit in line with me.	C. Consistent with my moderate intensity	D. Very much in line with me	D. Very much in line with me	C. Consistent with my moderate intensity	B. a little bit in line with me.	C. Consistent with my moderate intensity	B. a little bit in line with me.	D. Very much in line with me	B. a little bit in line with me.	Yes	Yes	No	Yes	Yes	Yes	Yes	Yes	Yes	No	Yes	Yes	No	No	No	Not sure	Not sure	Does not match	Not sure	Does not match	Conform	Not sure
86	2024/6/30 20:19:51	188 seconds	Mobile submission	Direct access	96	Female	21-23	Undergraduate study	E. High-intensity and sustained exercise with shortness of breath and a lot of sweating (such as running, aerobics sets, swimming, etc.)	C. 21 to 30 minutes	B. Three to five times a week	C. Dance Sport	B. a little bit in line with me.	B. a little bit in line with me.	A. Not at all.	B. a little bit in line with me.	C. Consistent with my moderate intensity	B. a little bit in line with me.	B. a little bit in line with me.	E. Extremely in line with me	E. Extremely in line with me	A. Not at all.	B. a little bit in line with me.	E. Extremely in line with me	B. a little bit in line with me.	E. Extremely in line with me	A. Not at all.	Yes	Yes	No	Yes	Yes	No	Yes	No	Yes	Yes	Yes	Yes	No	No	No	Not sure	Does not match	Extremely inconsistent	Does not match	Extremely inconsistent	Not sure	Does not match
87	2024/6/30 21:28:02	120 seconds	Mobile submission	Direct access	111	Female	18-20	Undergraduate study	A. Light exercise (such as walking, doing radio gymnastics, playing gateball, etc.)	A. Less than 10 minutes	A. Less than once A month	A. Walking and running F. Tai Chi and science of health preserving.	B. a little bit in line with me.	D. Very much in line with me	A. Not at all.	C. Consistent with my moderate intensity	C. Consistent with my moderate intensity	C. Consistent with my moderate intensity	C. Consistent with my moderate intensity	D. Very much in line with me	D. Very much in line with me	A. Not at all.	C. Consistent with my moderate intensity	D. Very much in line with me	C. Consistent with my moderate intensity	D. Very much in line with me	A. Not at all.	Yes	Yes	No	Yes	Yes	Yes	Yes	Yes	Yes	Yes	Yes	Yes	Yes	Yes	No	Conform	Conform	Conform	Conform	Conform	Conform	Conform
88	2024/6/30 21:48:52	3045 seconds	Mobile submission	Direct access	98	Female	21-23	Undergraduate study	C. Moderate intensity and more intense and lasting exercise (such as cycling, running, playing table tennis, etc.)	D. 31 to 59 minutes	C. 2 to 3 times a month	B. Travel, outing D. Ball games H. Swimming	C. Consistent with my moderate intensity	C. Consistent with my moderate intensity	B. a little bit in line with me.	D. Very much in line with me	C. Consistent with my moderate intensity	B. a little bit in line with me.	A. Not at all.	D. Very much in line with me	D. Very much in line with me	B. a little bit in line with me.	D. Very much in line with me	D. Very much in line with me	B. a little bit in line with me.	D. Very much in line with me	A. Not at all.	Yes	No	No	Yes	Yes	No	No	No	No	No	Yes	No	Yes	No	Yes	Conform	Not sure	Does not match	Not sure	Not sure	Not sure	Does not match
89	2024/6/30 22:39:05	174 seconds	Mobile submission	Direct access	92	Female	21-23	I'm studying for a master's degree	A. Light exercise (such as walking, doing radio gymnastics, playing gateball, etc.)	C. 21 to 30 minutes	B. Three to five times a week	A. Walking and running D. Ball games	B. a little bit in line with me.	D. Very much in line with me	B. a little bit in line with me.	D. Very much in line with me	D. Very much in line with me	A. Not at all.	B. a little bit in line with me.	D. Very much in line with me	C. Consistent with my moderate intensity	C. Consistent with my moderate intensity	C. Consistent with my moderate intensity	C. Consistent with my moderate intensity	B. a little bit in line with me.	C. Consistent with my moderate intensity	B. a little bit in line with me.	No	No	Yes	No	Yes	No	No	No	No	Yes	No	No	Yes	No	Yes	Conform	Not sure	Not sure	Not sure	Not sure	Not sure	Not sure
90	2024/6/30 23:47:47	285 seconds	Mobile submission	Direct access	88	Female	24-26	I'm studying for a master's degree	B. Low-intensity and low-tension sports (such as recreational volleyball, table tennis, jogging, Tai Chi, etc.)	C. 21 to 30 minutes	B. Three to five times a week	A. Walking and running D. Ball games H. Swimming	B. a little bit in line with me.	B. a little bit in line with me.	B. a little bit in line with me.	B. a little bit in line with me.	B. a little bit in line with me.	B. a little bit in line with me.	C. Consistent with my moderate intensity	C. Consistent with my moderate intensity	D. Very much in line with me	C. Consistent with my moderate intensity	C. Consistent with my moderate intensity	C. Consistent with my moderate intensity	C. Consistent with my moderate intensity	D. Very much in line with me	C. Consistent with my moderate intensity	Yes	Yes	No	Yes	No	No	Yes	Yes	Yes	Yes	Yes	Yes	No	Yes	No	Not sure	Not sure	Does not match	Does not match	Does not match	Not sure	Not sure
91	2024/7/1 6:55:54	205 seconds	Mobile submission	Direct access	91	Female	18-20	Undergraduate study	B. Low-intensity and low-tension sports (such as recreational volleyball, table tennis, jogging, Tai Chi, etc.)	C. 21 to 30 minutes	A. Less than once A month	A. Walking and running E. Skipping rope	B. a little bit in line with me.	C. Consistent with my moderate intensity	A. Not at all.	C. Consistent with my moderate intensity	B. a little bit in line with me.	A. Not at all.	B. a little bit in line with me.	C. Consistent with my moderate intensity	D. Very much in line with me	A. Not at all.	B. a little bit in line with me.	B. a little bit in line with me.	C. Consistent with my moderate intensity	D. Very much in line with me	A. Not at all.	No	No	Yes	No	No	Yes	No	No	No	Yes	No	Yes	No	No	Yes	Conform	Not sure	Does not match	Not sure	Not sure	Conform	Does not match
92	2024/7/1 8:43:47	147 seconds	WeChat	N/A	96	Female	24-26	I'm studying for a master's degree	E. High-intensity and sustained exercise with shortness of breath and a lot of sweating (such as running, aerobics sets, swimming, etc.)	D. 31 to 59 minutes	B. Three to five times a week	C. DanceSport I. Other	B. a little bit in line with me.	D. Very much in line with me	A. Not at all.	B. a little bit in line with me.	A. Not at all.	A. Not at all.	A. Not at all.	D. Very much in line with me	D. Very much in line with me	A. Not at all.	D. Very much in line with me	A. Not at all.	D. Very much in line with me	D. Very much in line with me	A. Not at all.	No	No	Yes	No	No	No	No	No	No	Yes	No	Yes	Yes	Yes	Yes	Conform	Conform	Does not match	Does not match	Does not match	Conform	Does not match
93	2024/7/1 10:01:47	94 seconds	Mobile submission	Direct access	94	Female	24-26	I'm studying for a master's degree	A. Light exercise (such as walking, doing radio gymnastics, playing gateball, etc.)	B. 11 to 20 minutes	C. Two to three times a month	A. Walking and running	B. a little bit in line with me.	B. a little bit in line with me.	B. a little bit in line with me.	B. a little bit in line with me.	B. a little bit in line with me.	C. Consistent with my moderate intensity	C. Consistent with my moderate intensity	B. a little bit in line with me.	B. a little bit in line with me.	C. Consistent with my moderate intensity	B. a little bit in line with me.	B. a little bit in line with me.	B. a little bit in line with me.	B. a little bit in line with me.	C. Consistent with my moderate intensity	Yes	Yes	Yes	Yes	Yes	Yes	Yes	Yes	Yes	Yes	Yes	Yes	No	No	No	Conform	Conform	Not sure	Conform	Conform	Conform	Extremely in line
94	2024/7/1 10:26:24	95 seconds	WeChat	N/A	118	Male	24-26	Undergraduate study	A. Light exercise (such as walking, doing radio gymnastics, playing gateball, etc.)	D. 31 to 59 minutes	B. Three to five times a week	B. Travel, outing C. Sports dance E. Skipping rope G. Fitness equipment activities	C. Consistent with my moderate intensity	C. Consistent with my moderate intensity	C. Consistent with my moderate intensity	D. Very much in line with me	E. Extremely in line with me	D. Very much in line with me	D. Very much in line with me	E. Extremely in line with me	D. Very much in line with me	E. Extremely in line with me	E. Extremely in line with me	D. Very much in line with me	D. Very much in line with me	C. Consistent with my moderate intensity	D. Very much in line with me	Yes	Yes	Yes	Yes	Yes	Yes	Yes	Yes	Yes	Yes	Yes	Yes	Yes	Yes	Yes	Conform	Extremely in line	Conform	Conform	Extremely in line	Conform	Conform
95	2024/7/1 10:31:14	109 seconds	WeChat	N/A	117	Female	21-23	I'm studying for a master's degree	A. Light exercise (such as walking, doing radio gymnastics, playing gateball, etc.)	C. 21 to 30 minutes	A. Less than once A month	A. Walking and running B. Travel and outing E. Skipping rope	D. Very much in line with me	E. Extremely in line with me	A. Not at all.	E. Extremely in line with me	D. Very much in line with me	E. Extremely in line with me	D. Very much in line with me	E. Extremely in line with me	D. Very much in line with me	A. Not at all.	E. Extremely in line with me	E. Extremely in line with me	D. Very much in line with me	E. Extremely in line with me	D. Very much in line with me	Yes	No	Yes	No	No	No	Yes	No	No	Yes	Yes	Yes	Yes	No	Yes	Conform	Conform	Extremely in line	Conform	Extremely in line	Conform	Extremely in line
96	2024/7/1 10:38:39	116 seconds	Mobile submission	Direct access	97	Female	24-26	I'm studying for a master's degree	B. Low-intensity and low-tension sports (such as recreational volleyball, table tennis, jogging, Tai Chi, etc.)	C. 21 to 30 minutes	B. Three to five times a week	D. Ball games F. Tai Chi and science of health preserving.	B. a little bit in line with me.	B. a little bit in line with me.	C. Consistent with my moderate intensity	C. Consistent with my moderate intensity	B. a little bit in line with me.	D. Very much in line with me	B. a little bit in line with me.	C. Consistent with my moderate intensity	C. Consistent with my moderate intensity	B. a little bit in line with me.	A. Not at all.	C. Consistent with my moderate intensity	A. Not at all.	C. Consistent with my moderate intensity	C. Consistent with my moderate intensity	Yes	Yes	No	Yes	Yes	Yes	Yes	Yes	Yes	No	Yes	Yes	No	No	No	Conform	Conform	Conform	Extremely in line	Conform	Conform	Conform
97	2024/7/1 11:34:58	530 seconds	WeChat	N/A	102	Female	21-23	Undergraduate study	A. Light exercise (such as walking, doing radio gymnastics, playing gateball, etc.)	C. 21 to 30 minutes	C. Two to three times a month	A. Walking, running B. Travel, outing G. Fitness equipment activities	B. a little bit in line with me.	D. Very much in line with me	C. Consistent with my moderate intensity	D. Very much in line with me	B. a little bit in line with me.	B. a little bit in line with me.	C. Consistent with my moderate intensity	C. Consistent with my moderate intensity	C. Consistent with my moderate intensity	B. a little bit in line with me.	C. Consistent with my moderate intensity	A. Not at all.	B. a little bit in line with me.	D. Very much in line with me	B. a little bit in line with me.	Yes	Yes	Yes	Yes	Yes	Yes	No	Yes	Yes	Yes	Yes	Yes	No	No	No	Conform	Conform	Not sure	Conform	Conform	Conform	Conform
98	2024/7/1 12:18:32	45 seconds	Mobile submission	Direct access	72	Female	18-20	Undergraduate study	A. Light exercise (such as walking, doing radio gymnastics, playing gateball, etc.)	B. 11 to 20 minutes	B. Three to five times a week	A. Walking, running B. Travel, outing C. Sports dance	D. Very much in line with me	B. a little bit in line with me.	B. a little bit in line with me.	C. Consistent with my moderate intensity	B. a little bit in line with me.	B. a little bit in line with me.	B. a little bit in line with me.	C. Consistent with my moderate intensity	B. a little bit in line with me.	A. Not at all.	C. Consistent with my moderate intensity	B. a little bit in line with me.	B. a little bit in line with me.	B. a little bit in line with me.	A. Not at all.	Yes	Yes	Yes	Yes	Yes	Yes	No	No	Yes	Yes	Yes	Yes	No	Yes	Yes	Extremely inconsistent	Extremely inconsistent	Extremely inconsistent	Extremely inconsistent	Extremely inconsistent	Extremely inconsistent	Extremely inconsistent
99	2024/7/1 12:20:23	219 seconds	WeChat	N/A	107	Female	24-26	I'm studying for a master's degree	B. Low-intensity and low-tension sports (such as recreational volleyball, table tennis, jogging, Tai Chi, etc.)	C. 21 to 30 minutes	E. 1-2 times per week	A. Walking, running B. Travel, outing F. Tai Chi, science of health preserving H. Swimming	C. Consistent with my moderate intensity	D. Very much in line with me	C. Consistent with my moderate intensity	D. Very much in line with me	D. Very much in line with me	C. Consistent with my moderate intensity	B. a little bit in line with me.	E. Extremely in line with me	D. Very much in line with me	B. a little bit in line with me.	C. Consistent with my moderate intensity	D. Very much in line with me	C. Consistent with my moderate intensity	D. Very much in line with me	B. a little bit in line with me.	Yes	Yes	No	Yes	Yes	Yes	Yes	Yes	Yes	Yes	Yes	No	No	No	No	Conform	Not sure	Not sure	Not sure	Does not match	Conform	Not sure
100	2024/7/1 13:15:15	203 seconds	WeChat	N/A	106	Male	18-20	Undergraduate study	D. High-intensity but not sustained exercise with shortness of breath and a lot of sweating (such as playing badminton, basketball, tennis, football, etc.)	E. More than 60 minutes	E. 1-2 times per week	A. Walking, running B. Travel, outing D. Ball games G. Fitness equipment activities H. Swimming	B. a little bit in line with me.	C. Consistent with my moderate intensity	C. Consistent with my moderate intensity	B. a little bit in line with me.	C. Consistent with my moderate intensity	C. Consistent with my moderate intensity	B. a little bit in line with me.	C. Consistent with my moderate intensity	C. Consistent with my moderate intensity	B. a little bit in line with me.	C. Consistent with my moderate intensity	C. Consistent with my moderate intensity	C. Consistent with my moderate intensity	D. Very much in line with me	C. Consistent with my moderate intensity	Yes	Yes	No	Yes	Yes	Yes	Yes	Yes	Yes	Yes	Yes	Yes	No	No	No	Conform	Not sure	Not sure	Conform	Conform	Conform	Conform
101	2024/7/1 15:01:20	69Seconds	WeChat	N/A	102	Female	21-23	Undergraduate study	C.Moderate intensity, more intense and lasting exercise (such as cycling, running, playing table tennis, etc.)	E.60More than minutes	C.One month2To3Times	A.Walk, run	d.It fits me very well.	c.Consistent with my moderate intensity.	b.Matches me a little bit.	c.Consistent with my moderate intensity.	d.It fits me very well.	d.It fits me very well.	d.It fits me very well.	c.Consistent with my moderate intensity.	d.It fits me very well.	d.It fits me very well.	b.Matches me a little bit.	b.Matches me a little bit.	c.Consistent with my moderate intensity.	c.Consistent with my moderate intensity.	c.Consistent with my moderate intensity.	Yes	Yes	Yes	Yes	Yes	Yes	Yes	Yes	Yes	Yes	Yes	Yes	Yes	Yes	Yes	Not sure	Not sure	Not sure	Not sure	Not sure	Not sure	Not sure
102	2024/7/1 15:03:43	232 seconds	WeChat	N/A	100	Male	18-20	Undergraduate study	D. High-intensity but not sustained exercise with shortness of breath and a lot of sweating (such as playing badminton, basketball, tennis, football, etc.)	D. 31 to 59 minutes	B. Three to five times a week	A. Walking, running B. Travel, outing D. Ball games	C. Consistent with my moderate intensity	C. Consistent with my moderate intensity	C. Consistent with my moderate intensity	C. Consistent with my moderate intensity	C. Consistent with my moderate intensity	C. Consistent with my moderate intensity	C. Consistent with my moderate intensity	D. Very much in line with me	B. a little bit in line with me.	C. Consistent with my moderate intensity	C. Consistent with my moderate intensity	C. Consistent with my moderate intensity	C. Consistent with my moderate intensity	C. Consistent with my moderate intensity	C. Consistent with my moderate intensity	Yes	Yes	No	Yes	Yes	Yes	Yes	Yes	Yes	No	Yes	Yes	No	No	No	Conform	Not sure	Not sure	Conform	Not sure	Not sure	Conform
103	2024/7/1 15:07:50	67Seconds	WeChat	N/A	98	Female	18-20	Undergraduate study	B.Low-intensity and low-stress sports (such as recreational volleyball, table tennis, jogging, Tai Chi, etc.)	B.11To20Minute	E.Every week1To2Times	A.Walk, run	c.Consistent with my moderate intensity.	c.Consistent with my moderate intensity.	c.Consistent with my moderate intensity.	c.Consistent with my moderate intensity.	d.It fits me very well.	a.It doesn't match at all.	b.Matches me a little bit.	c.Consistent with my moderate intensity.	c.Consistent with my moderate intensity.	d.It fits me very well.	c.Consistent with my moderate intensity.	c.Consistent with my moderate intensity.	d.It fits me very well.	c.Consistent with my moderate intensity.	a.It doesn't match at all.	Yes	Yes	Yes	Yes	Yes	No	No	Yes	Yes	No	No	No	No	Yes	No	Conform	Not sure	Not sure	Not sure	Not sure	Not sure	Not sure
104	2024/7/1 18:09:12	327 seconds	WeChat	N/A	76	Female	24-26	I'm studying for a master's degree	B. Low-intensity and low-tension sports (such as recreational volleyball, table tennis, jogging, Tai Chi, etc.)	C. 21 to 30 minutes	C. 2 to 3 times a month	A. Walking, running B. Travel, outing D. Ball games G. Fitness equipment activities	A. Not at all.	A. Not at all.	E. Extremely in line with me	B. a little bit in line with me.	A. Not at all.	D. Very much in line with me	B. a little bit in line with me.	C. Consistent with my moderate intensity	B. a little bit in line with me.	D. Very much in line with me	B. a little bit in line with me.	C. Consistent with my moderate intensity	A. Not at all.	D. Very much in line with me	C. Consistent with my moderate intensity	Yes	Yes	No	No	Yes	Yes	No	Yes	Yes	No	Yes	Yes	No	No	Yes	Not sure	Not sure	Does not match	Not sure	Not sure	Conform	Conform
105	2024/7/1 19:44:18	109 seconds	Mobile submission	Direct access	107	Female	21-23	Undergraduate study	A. Light exercise (such as walking, doing radio gymnastics, playing gateball, etc.)	B. 11 to 20 minutes	A. Less than once A month	A. Walking and running E. Skipping rope	A. Not at all.	B. a little bit in line with me.	B. a little bit in line with me.	A. Not at all.	B. a little bit in line with me.	B. a little bit in line with me.	B. a little bit in line with me.	D. Very much in line with me	D. Very much in line with me	A. Not at all.	D. Very much in line with me	B. a little bit in line with me.	D. Very much in line with me	D. Very much in line with me	D. Very much in line with me	Yes	Yes	No	No	Yes	Yes	Yes	Yes	Yes	Yes	Yes	Yes	Yes	Yes	Yes	Conform	Conform	Conform	Extremely in line	Extremely in line	Extremely in line	Extremely in line
106	2024/7/1 22:07:09	469 seconds	WeChat	N/A	108	Male	21-23	Undergraduate study	E. High-intensity and sustained exercise with shortness of breath and a lot of sweating (such as running, aerobics sets, swimming, etc.)	B. 11 to 20 minutes	C. Two to three times a month	A. Walking and running C. Sports dance G. Fitness equipment activities	C. Consistent with my moderate intensity	E. Extremely in line with me	D. Very much in line with me	D. Very much in line with me	D. Very much in line with me	D. Very much in line with me	E. Extremely in line with me	E. Extremely in line with me	E. Extremely in line with me	D. Very much in line with me	B. a little bit in line with me.	E. Extremely in line with me	B. a little bit in line with me.	D. Very much in line with me	E. Extremely in line with me	Yes	Yes	Yes	No	Yes	No	Yes	Yes	Yes	Yes	Yes	Yes	No	Yes	Yes	Conform	Does not match	Conform	Does not match	Extremely in line	Not sure	Extremely in line
107	2024/7/1 22:07:17	466 seconds	WeChat	N/A	114	Female	18-20	Undergraduate study	D. High-intensity but not sustained exercise with shortness of breath and a lot of sweating (such as playing badminton, basketball, tennis, football, etc.)	C. 21 to 30 minutes	C. Two to three times a month	D. Ball games F. Tai Chi and science of health preserving.	D. Very much in line with me	E. Extremely in line with me	D. Very much in line with me	D. Very much in line with me	E. Extremely in line with me	E. Extremely in line with me	D. Very much in line with me	D. Very much in line with me	D. Very much in line with me	D. Very much in line with me	C. Consistent with my moderate intensity	E. Extremely in line with me	B. a little bit in line with me.	D. Very much in line with me	D. Very much in line with me	Yes	Yes	Yes	Yes	Yes	Yes	Yes	Yes	Yes	Yes	Yes	No	No	Yes	Yes	Conform	Conform	Not sure	Extremely in line	Not sure	Extremely in line	Conform
108	2024/7/1 22:07:28	460 seconds	WeChat	N/A	108	Male	21-23	Undergraduate study	C. Moderate intensity and more intense and lasting exercise (such as cycling, running, playing table tennis, etc.)	B. 11 to 20 minutes	C. Two to three times a month	D. Ball games E. Skipping F. Tai Chi and science of health preserving.	D. Very much in line with me	D. Very much in line with me	D. Very much in line with me	E. Extremely in line with me	D. Very much in line with me	E. Extremely in line with me	E. Extremely in line with me	C. Consistent with my moderate intensity	C. Consistent with my moderate intensity	B. a little bit in line with me.	A. Not at all.	D. Very much in line with me	C. Consistent with my moderate intensity	D. Very much in line with me	D. Very much in line with me	Yes	Yes	Yes	Yes	Yes	Yes	No	Yes	No	Yes	No	Yes	Yes	Yes	No	Conform	Does not match	Conform	Conform	Conform	Conform	Extremely in line
109	2024/7/1 22:07:38	448 seconds	WeChat	N/A	104	Female	21-23	Undergraduate study	B. Low-intensity and low-tension sports (such as recreational volleyball, table tennis, jogging, Tai Chi, etc.)	B. 11 to 20 minutes	C. Two to three times a month	A. Walking and running B. Travel and outing	D. Very much in line with me	C. Consistent with my moderate intensity	E. Extremely in line with me	C. Consistent with my moderate intensity	E. Extremely in line with me	E. Extremely in line with me	D. Very much in line with me	D. Very much in line with me	E. Extremely in line with me	D. Very much in line with me	C. Consistent with my moderate intensity	D. Very much in line with me	C. Consistent with my moderate intensity	D. Very much in line with me	B. a little bit in line with me.	Yes	Yes	Yes	Yes	Yes	Yes	No	Yes	Yes	No	No	Yes	Yes	No	No	Conform	Extremely in line	Conform	Extremely in line	Extremely in line	Extremely in line	Not sure
110	2024/7/1 22:07:44	426 seconds	WeChat	N/A	106	Male	24-26	I'm studying for a master's degree	C. Moderate intensity and more intense and lasting exercise (such as cycling, running, playing table tennis, etc.)	A. Less than 10 minutes	D. Approximately once a day	D. Ball games G. Exercise equipment activities	D. Very much in line with me	E. Extremely in line with me	E. Extremely in line with me	E. Extremely in line with me	D. Very much in line with me	D. Very much in line with me	D. Very much in line with me	B. a little bit in line with me.	E. Extremely in line with me	D. Very much in line with me	D. Very much in line with me	E. Extremely in line with me	B. a little bit in line with me.	D. Very much in line with me	D. Very much in line with me	No	No	Yes	No	Yes	No	No	Yes	No	Yes	No	No	Yes	Yes	No	Extremely in line	Extremely in line	Conform	Conform	Conform	Extremely in line	Conform
111	2024/7/1 22:07:48	388 seconds	WeChat	N/A	119	Female	18-20	I'm studying in a specialist	B. Low-intensity and low-tension sports (such as recreational volleyball, table tennis, jogging, Tai Chi, etc.)	C. 21 to 30 minutes	D. Approximately once a day	C. Sports Dance D. Ball Games E. Skipping Rope	D. Very much in line with me	E. Extremely in line with me	C. Consistent with my moderate intensity	E. Extremely in line with me	D. Very much in line with me	D. Very much in line with me	E. Extremely in line with me	E. Extremely in line with me	E. Extremely in line with me	D. Very much in line with me	D. Very much in line with me	C. Consistent with my moderate intensity	B. a little bit in line with me.	D. Very much in line with me	E. Extremely in line with me	Yes	Yes	No	Yes	Yes	Yes	No	Yes	Yes	Yes	Yes	Yes	No	Yes	Yes	Not sure	Not sure	Extremely in line	Conform	Extremely in line	Extremely in line	Extremely in line
112	2024/7/1 22:07:51	485 seconds	WeChat	N/A	110	Male	24-26	I'm studying for a master's degree	D. High-intensity but not sustained exercise with shortness of breath and a lot of sweating (such as playing badminton, basketball, tennis, football, etc.)	B. 11 to 20 minutes	A. Less than once A month	A. Walking and running G. Exercise equipment activities	E. Extremely in line with me	C. Consistent with my moderate intensity	D. Very much in line with me	D. Very much in line with me	E. Extremely in line with me	E. Extremely in line with me	E. Extremely in line with me	B. a little bit in line with me.	E. Extremely in line with me	C. Consistent with my moderate intensity	D. Very much in line with me	D. Very much in line with me	E. Extremely in line with me	E. Extremely in line with me	E. Extremely in line with me	Yes	No	No	No	Yes	Yes	No	Yes	Yes	Yes	Yes	Yes	No	No	No	Extremely in line	Extremely in line	Conform	Extremely in line	Extremely in line	Conform	Not sure
113	2024/7/1 22:08:03	499 seconds	WeChat	N/A	110	Female	24-26	I'm studying for a master's degree	B. Low-intensity and low-tension sports (such as recreational volleyball, table tennis, jogging, Tai Chi, etc.)	C. 21 to 30 minutes	B. Three to five times a week	A. Walking and running D. Ball games F. Tai Chi and science of health preserving.	D. Very much in line with me	E. Extremely in line with me	D. Very much in line with me	E. Extremely in line with me	D. Very much in line with me	E. Extremely in line with me	C. Consistent with my moderate intensity	B. a little bit in line with me.	C. Consistent with my moderate intensity	A. Not at all.	D. Very much in line with me	B. a little bit in line with me.	C. Consistent with my moderate intensity	E. Extremely in line with me	E. Extremely in line with me	No	Yes	Yes	Yes	Yes	Yes	Yes	Yes	Yes	Yes	Yes	Yes	Yes	Yes	Yes	Conform	Conform	Extremely in line	Not sure	Not sure	Conform	Not sure
114	2024/7/1 22:08:07	472 seconds	WeChat	N/A	114	Female	18-20	Undergraduate study	A. Light exercise (such as walking, doing radio gymnastics, playing gateball, etc.)	C. 21 to 30 minutes	C. Two to three times a month	C. Sports Dance E. Skipping F. Tai Chi and science of health preserving.	D. Very much in line with me	E. Extremely in line with me	D. Very much in line with me	D. Very much in line with me	E. Extremely in line with me	E. Extremely in line with me	D. Very much in line with me	E. Extremely in line with me	E. Extremely in line with me	B. a little bit in line with me.	A. Not at all.	E. Extremely in line with me	B. a little bit in line with me.	D. Very much in line with me	E. Extremely in line with me	Yes	Yes	Yes	Yes	No	No	Yes	Yes	No	Yes	No	Yes	Yes	Yes	Yes	Extremely in line	Conform	Conform	Conform	Not sure	Extremely in line	Conform
115	2024/7/1 22:08:11	546 seconds	WeChat	N/A	105	Male	24-26	I'm studying for a master's degree	A. Light exercise (such as walking, doing radio gymnastics, playing gateball, etc.)	A. Less than 10 minutes	A. Less than once A month	C. Sports Dance G. Exercise Machine Activities	C. Consistent with my moderate intensity	E. Extremely in line with me	E. Extremely in line with me	B. a little bit in line with me.	D. Very much in line with me	C. Consistent with my moderate intensity	E. Extremely in line with me	E. Extremely in line with me	E. Extremely in line with me	D. Very much in line with me	D. Very much in line with me	D. Very much in line with me	B. a little bit in line with me.	C. Consistent with my moderate intensity	D. Very much in line with me	Yes	Yes	Yes	Yes	Yes	Yes	Yes	Yes	Yes	No	Yes	Yes	No	Yes	Yes	Extremely in line	Conform	Does not match	Conform	Extremely in line	Conform	Conform
116	2024/7/1 22:08:20	457 seconds	WeChat	N/A	120	Female	24-26	I'm studying for a master's degree	D. High-intensity but not sustained exercise with shortness of breath and a lot of sweating (such as playing badminton, basketball, tennis, football, etc.)	B. 11 to 20 minutes	C. 2 to 3 times a month	A. Walking and running B. Travel and outing E. Skipping rope	D. Very much in line with me	E. Extremely in line with me	D. Very much in line with me	E. Extremely in line with me	C. Consistent with my moderate intensity	D. Very much in line with me	D. Very much in line with me	D. Very much in line with me	E. Extremely in line with me	A. Not at all.	B. a little bit in line with me.	C. Consistent with my moderate intensity	C. Consistent with my moderate intensity	D. Very much in line with me	D. Very much in line with me	No	Yes	Yes	Yes	Yes	Yes	Yes	Yes	No	Yes	Yes	Yes	Yes	Yes	Yes	Extremely in line	Extremely in line	Extremely in line	Conform	Conform	Extremely in line	Extremely in line
117	2024/7/1 22:08:28	454 seconds	WeChat	N/A	116	Female	24-26	I'm studying for a master's degree	C. Moderate intensity and more intense and lasting exercise (such as cycling, running, playing table tennis, etc.)	D. 31 to 59 minutes	C. Two to three times a month	A. Walking and running C. Sports dance D. Ball games	C. Consistent with my moderate intensity	E. Extremely in line with me	D. Very much in line with me	D. Very much in line with me	E. Extremely in line with me	D. Very much in line with me	D. Very much in line with me	D. Very much in line with me	D. Very much in line with me	C. Consistent with my moderate intensity	C. Consistent with my moderate intensity	E. Extremely in line with me	C. Consistent with my moderate intensity	D. Very much in line with me	D. Very much in line with me	Yes	No	No	Yes	Yes	Yes	No	Yes	Yes	Yes	Yes	Yes	No	Yes	Yes	Conform	Extremely in line	Conform	Conform	Extremely in line	Conform	Not sure
118	2024/7/1 22:08:38	552 seconds	WeChat	N/A	117	Female	18-20	Undergraduate study	C. Moderate intensity and more intense and lasting exercise (such as cycling, running, playing table tennis, etc.)	E. More than 60 minutes	D. Approximately once a day	A. Walking and running E. Skipping rope	D. Very much in line with me	E. Extremely in line with me	E. Extremely in line with me	B. a little bit in line with me.	C. Consistent with my moderate intensity	B. a little bit in line with me.	D. Very much in line with me	D. Very much in line with me	E. Extremely in line with me	C. Consistent with my moderate intensity	D. Very much in line with me	E. Extremely in line with me	B. a little bit in line with me.	D. Very much in line with me	D. Very much in line with me	No	Yes	Yes	No	Yes	Yes	No	Yes	No	No	Yes	Yes	Yes	Yes	Yes	Conform	Extremely in line	Extremely in line	Conform	Conform	Extremely in line	Extremely in line
119	2024/7/1 22:08:48	426 seconds	WeChat	N/A	117	Female	24-26	I'm studying for a master's degree	D. High-intensity but not sustained exercise with shortness of breath and a lot of sweating (such as playing badminton, basketball, tennis, football, etc.)	B. 11 to 20 minutes	D. Approximately once a day	A. Walking and running C. Sports dance D. Ball games	C. Consistent with my moderate intensity	E. Extremely in line with me	D. Very much in line with me	E. Extremely in line with me	C. Consistent with my moderate intensity	E. Extremely in line with me	D. Very much in line with me	E. Extremely in line with me	E. Extremely in line with me	C. Consistent with my moderate intensity	E. Extremely in line with me	D. Very much in line with me	A. Not at all.	E. Extremely in line with me	E. Extremely in line with me	No	Yes	Yes	Yes	No	Yes	Yes	Yes	No	No	Yes	Yes	Yes	No	Yes	Extremely in line	Extremely in line	Extremely in line	Conform	Conform	Extremely in line	Conform
120	2024/7/1 22:08:52	510 seconds	WeChat	N/A	108	Female	18-20	Undergraduate study	C. Moderate intensity and more intense and lasting exercise (such as cycling, running, playing table tennis, etc.)	B. 11 to 20 minutes	D. Approximately once a day	A. Walking and running C. Sports dance D. Ball games	D. Very much in line with me	D. Very much in line with me	E. Extremely in line with me	B. a little bit in line with me.	D. Very much in line with me	C. Consistent with my moderate intensity	E. Extremely in line with me	E. Extremely in line with me	B. a little bit in line with me.	D. Very much in line with me	C. Consistent with my moderate intensity	A. Not at all.	E. Extremely in line with me	D. Very much in line with me	D. Very much in line with me	Yes	Yes	Yes	No	No	No	No	No	No	Yes	Yes	Yes	No	Yes	No	Extremely in line	Extremely in line	Extremely in line	Conform	Extremely in line	Conform	Conform
121	2024/7/1 22:08:57	415 seconds	WeChat	N/A	111	Male	24-26	I'm studying for a master's degree	C. Moderate intensity and more intense and lasting exercise (such as cycling, running, playing table tennis, etc.)	D. 31 to 59 minutes	C. 2 to 3 times a month	A. Walking and running B. Travel and outing E. Skipping rope	D. Very much in line with me	E. Extremely in line with me	D. Very much in line with me	E. Extremely in line with me	B. a little bit in line with me.	E. Extremely in line with me	E. Extremely in line with me	E. Extremely in line with me	C. Consistent with my moderate intensity	B. a little bit in line with me.	E. Extremely in line with me	B. a little bit in line with me.	B. a little bit in line with me.	D. Very much in line with me	B. a little bit in line with me.	Yes	No	Yes	No	Yes	Yes	No	No	Yes	Yes	Yes	Yes	No	Yes	Yes	Conform	Conform	Conform	Extremely in line	Conform	Not sure	Conform
122	2024/7/1 22:09:00	389 seconds	WeChat	N/A	114	Female	21-23	Undergraduate study	C. Moderate intensity and more intense and lasting exercise (such as cycling, running, playing table tennis, etc.)	C. 21 to 30 minutes	D. Approximately once a day	A. Walking and running G. Exercise equipment activities	D. Very much in line with me	B. a little bit in line with me.	E. Extremely in line with me	E. Extremely in line with me	D. Very much in line with me	D. Very much in line with me	C. Consistent with my moderate intensity	B. a little bit in line with me.	E. Extremely in line with me	A. Not at all.	C. Consistent with my moderate intensity	E. Extremely in line with me	D. Very much in line with me	D. Very much in line with me	E. Extremely in line with me	Yes	No	Yes	Yes	Yes	Yes	Yes	Yes	Yes	Yes	Yes	Yes	No	Yes	Yes	Conform	Conform	Extremely in line	Conform	Extremely in line	Extremely in line	Conform
123	2024/7/1 22:09:07	504 seconds	WeChat	N/A	107	Female	21-23	Undergraduate study	B. Low-intensity and low-tension sports (such as recreational volleyball, table tennis, jogging, Tai Chi, etc.)	C. 21 to 30 minutes	A. Less than once A month	A. Walking and running D. Ball games G. Fitness equipment activities	B. a little bit in line with me.	D. Very much in line with me	B. a little bit in line with me.	B. a little bit in line with me.	D. Very much in line with me	C. Consistent with my moderate intensity	D. Very much in line with me	E. Extremely in line with me	E. Extremely in line with me	A. Not at all.	E. Extremely in line with me	D. Very much in line with me	B. a little bit in line with me.	D. Very much in line with me	D. Very much in line with me	Yes	No	Yes	Yes	Yes	No	No	No	Yes	No	No	Yes	Yes	Yes	No	Extremely in line	Extremely in line	Extremely in line	Conform	Conform	Extremely in line	Not sure
124	2024/7/1 22:09:21	470 seconds	WeChat	N/A	112	Male	24-26	I'm studying for a master's degree	A. Light exercise (such as walking, doing radio gymnastics, playing gateball, etc.)	C. 21 to 30 minutes	C. Two to three times a month	A. Walking and running C. Sports dance F. Tai Chi and science of health preserving.	C. Consistent with my moderate intensity	C. Consistent with my moderate intensity	E. Extremely in line with me	D. Very much in line with me	D. Very much in line with me	C. Consistent with my moderate intensity	D. Very much in line with me	E. Extremely in line with me	E. Extremely in line with me	C. Consistent with my moderate intensity	B. a little bit in line with me.	E. Extremely in line with me	B. a little bit in line with me.	D. Very much in line with me	C. Consistent with my moderate intensity	Yes	Yes	Yes	No	Yes	Yes	Yes	Yes	Yes	Yes	No	Yes	Yes	Yes	Yes	Conform	Extremely in line	Conform	Conform	Extremely in line	Conform	Conform
125	2024/7/1 22:09:29	475 seconds	WeChat	N/A	107	Female	18-20	Undergraduate study	D. High-intensity but not sustained exercise with shortness of breath and a lot of sweating (such as playing badminton, basketball, tennis, football, etc.)	B. 11 to 20 minutes	D. Approximately once a day	A. Walking and running F. Tai Chi and science of health preserving.	D. Very much in line with me	D. Very much in line with me	D. Very much in line with me	D. Very much in line with me	E. Extremely in line with me	E. Extremely in line with me	E. Extremely in line with me	E. Extremely in line with me	C. Consistent with my moderate intensity	B. a little bit in line with me.	C. Consistent with my moderate intensity	B. a little bit in line with me.	B. a little bit in line with me.	B. a little bit in line with me.	B. a little bit in line with me.	No	Yes	Yes	Yes	Yes	Yes	Yes	No	Yes	Yes	Yes	Yes	No	No	Yes	Does not match	Conform	Does not match	Conform	Conform	Extremely in line	Conform
126	2024/7/1 22:09:30	404 seconds	WeChat	N/A	103	Male	24-26	I'm studying for a master's degree	D. High-intensity but not sustained exercise with shortness of breath and a lot of sweating (such as playing badminton, basketball, tennis, football, etc.)	C. 21 to 30 minutes	B. Three to five times a week	A. Walking and running E. Skipping rope	D. Very much in line with me	E. Extremely in line with me	D. Very much in line with me	D. Very much in line with me	D. Very much in line with me	C. Consistent with my moderate intensity	D. Very much in line with me	D. Very much in line with me	D. Very much in line with me	C. Consistent with my moderate intensity	B. a little bit in line with me.	E. Extremely in line with me	D. Very much in line with me	E. Extremely in line with me	D. Very much in line with me	No	Yes	No	Yes	No	Yes	Yes	Yes	Yes	No	No	Yes	No	Yes	Yes	Does not match	Not sure	Not sure	Does not match	Does not match	Extremely in line	Conform
127	2024/7/1 22:09:39	502 seconds	WeChat	N/A	106	Female	18-20	Undergraduate study	C. Moderate intensity and more intense and lasting exercise (such as cycling, running, playing table tennis, etc.)	C. 21 to 30 minutes	A. Less than once A month	A. Walking, running F. Tai Chi, science of health preserving G. Exercise equipment activities	D. Very much in line with me	C. Consistent with my moderate intensity	E. Extremely in line with me	E. Extremely in line with me	D. Very much in line with me	D. Very much in line with me	D. Very much in line with me	E. Extremely in line with me	B. a little bit in line with me.	E. Extremely in line with me	D. Very much in line with me	C. Consistent with my moderate intensity	C. Consistent with my moderate intensity	C. Consistent with my moderate intensity	C. Consistent with my moderate intensity	Yes	Yes	Yes	Yes	No	No	Yes	Yes	Yes	No	No	Yes	No	Yes	No	Conform	Extremely in line	Extremely in line	Conform	Extremely in line	Conform	Extremely in line
128	2024/7/1 22:10:02	412 seconds	WeChat	N/A	104	Male	21-23	Undergraduate study	A. Light exercise (such as walking, doing radio gymnastics, playing gateball, etc.)	D. 31 to 59 minutes	D. Approximately once a day	A. Walking and running E. Skipping rope	C. Consistent with my moderate intensity	C. Consistent with my moderate intensity	E. Extremely in line with me	E. Extremely in line with me	D. Very much in line with me	E. Extremely in line with me	D. Very much in line with me	B. a little bit in line with me.	E. Extremely in line with me	D. Very much in line with me	A. Not at all.	D. Very much in line with me	B. a little bit in line with me.	C. Consistent with my moderate intensity	D. Very much in line with me	Yes	Yes	Yes	Yes	Yes	No	Yes	Yes	Yes	Yes	Yes	Yes	Yes	Yes	Yes	Conform	Extremely in line	Conform	Extremely in line	Conform	Conform	Conform
129	2024/7/1 22:10:20	543 seconds	WeChat	N/A	113	Female	18-20	Undergraduate study	D. High-intensity but not sustained exercise with shortness of breath and a lot of sweating (such as playing badminton, basketball, tennis, football, etc.)	C. 21 to 30 minutes	D. Approximately once a day	A. Walking and running C. Sports dance G. Fitness equipment activities	E. Extremely in line with me	D. Very much in line with me	E. Extremely in line with me	D. Very much in line with me	D. Very much in line with me	D. Very much in line with me	D. Very much in line with me	D. Very much in line with me	E. Extremely in line with me	D. Very much in line with me	C. Consistent with my moderate intensity	E. Extremely in line with me	D. Very much in line with me	B. a little bit in line with me.	C. Consistent with my moderate intensity	Yes	Yes	Yes	No	Yes	Yes	Yes	Yes	No	Yes	Yes	Yes	Yes	Yes	No	Extremely in line	Does not match	Not sure	Extremely in line	Conform	Conform	Extremely in line
130	2024/7/1 22:10:44	424 seconds	WeChat	N/A	107	Male	18-20	Undergraduate study	C. Moderate intensity and more intense and lasting exercise (such as cycling, running, playing table tennis, etc.)	D. 31 to 59 minutes	D. Approximately once a day	B. Travel, outing C. Sports dance G. Fitness equipment activities	B. a little bit in line with me.	D. Very much in line with me	D. Very much in line with me	D. Very much in line with me	D. Very much in line with me	E. Extremely in line with me	D. Very much in line with me	D. Very much in line with me	E. Extremely in line with me	B. a little bit in line with me.	B. a little bit in line with me.	A. Not at all.	B. a little bit in line with me.	E. Extremely in line with me	E. Extremely in line with me	Yes	No	Yes	No	No	Yes	Yes	Yes	No	No	Yes	Yes	No	No	Yes	Conform	Extremely in line	Not sure	Conform	Extremely in line	Conform	Extremely in line
131	2024/7/1 22:11:02	516 seconds	WeChat	N/A	110	Male	18-20	Undergraduate study	C. Moderate intensity and more intense and lasting exercise (such as cycling, running, playing table tennis, etc.)	D. 31 to 59 minutes	B. Three to five times a week	E. Rope skipping G. Exercise equipment activities	D. Very much in line with me	E. Extremely in line with me	D. Very much in line with me	E. Extremely in line with me	D. Very much in line with me	E. Extremely in line with me	D. Very much in line with me	E. Extremely in line with me	C. Consistent with my moderate intensity	C. Consistent with my moderate intensity	D. Very much in line with me	C. Consistent with my moderate intensity	A. Not at all.	D. Very much in line with me	D. Very much in line with me	Yes	Yes	Yes	Yes	Yes	Yes	No	Yes	Yes	Yes	No	No	Yes	Yes	Yes	Conform	Not sure	Extremely in line	Conform	Not sure	Conform	Does not match
132	2024/7/1 22:11:13	478 seconds	WeChat	N/A	116	Male	18-20	I'm studying in a specialist	C. Moderate intensity and more intense and lasting exercise (such as cycling, running, playing table tennis, etc.)	D. 31 to 59 minutes	C. Two to three times a month	A. Walking and running G. Exercise machine activity H. Swimming	D. Very much in line with me	E. Extremely in line with me	B. a little bit in line with me.	D. Very much in line with me	D. Very much in line with me	E. Extremely in line with me	D. Very much in line with me	E. Extremely in line with me	E. Extremely in line with me	C. Consistent with my moderate intensity	D. Very much in line with me	D. Very much in line with me	B. a little bit in line with me.	D. Very much in line with me	E. Extremely in line with me	Yes	Yes	Yes	Yes	No	Yes	Yes	Yes	Yes	Yes	No	Yes	Yes	Yes	No	Extremely in line	Extremely in line	Conform	Not sure	Extremely in line	Conform	Conform
133	2024/7/1 22:11:20	458 seconds	WeChat	N/A	114	Male	18-20	I'm studying in a specialist	D. High-intensity but not sustained exercise with shortness of breath and a lot of sweating (such as playing badminton, basketball, tennis, football, etc.)	D. 31 to 59 minutes	A. Less than once A month	A. Walking and running E. Skipping G. Exercise equipment activities	E. Extremely in line with me	E. Extremely in line with me	D. Very much in line with me	E. Extremely in line with me	D. Very much in line with me	E. Extremely in line with me	E. Extremely in line with me	E. Extremely in line with me	E. Extremely in line with me	A. Not at all.	D. Very much in line with me	D. Very much in line with me	D. Very much in line with me	D. Very much in line with me	D. Very much in line with me	Yes	No	Yes	Yes	No	Yes	Yes	No	Yes	Yes	Yes	Yes	No	No	Yes	Conform	Not sure	Does not match	Conform	Extremely in line	Extremely in line	Not sure
134	2024/7/1 22:11:30	488 seconds	WeChat	N/A	104	Female	18-20	Undergraduate study	A. Light exercise (such as walking, doing radio gymnastics, playing gateball, etc.)	B. 11 to 20 minutes	E. 1-2 times per week	D. Ball games G. Exercise equipment activities	B. a little bit in line with me.	D. Very much in line with me	D. Very much in line with me	D. Very much in line with me	D. Very much in line with me	E. Extremely in line with me	D. Very much in line with me	E. Extremely in line with me	B. a little bit in line with me.	D. Very much in line with me	A. Not at all.	B. a little bit in line with me.	B. a little bit in line with me.	E. Extremely in line with me	D. Very much in line with me	Yes	Yes	No	No	Yes	Yes	No	Yes	No	Yes	Yes	Yes	No	Yes	Yes	Extremely in line	Extremely in line	Conform	Conform	Extremely in line	Extremely in line	Conform
135	2024/7/1 22:11:41	407 seconds	WeChat	N/A	107	Female	18-20	I'm studying in a specialist	A. Light exercise (such as walking, doing radio gymnastics, playing gateball, etc.)	D. 31 to 59 minutes	C. 2 to 3 times a month	B. Travel, outing C. Sports dance G. Fitness equipment activities	E. Extremely in line with me	E. Extremely in line with me	E. Extremely in line with me	D. Very much in line with me	E. Extremely in line with me	C. Consistent with my moderate intensity	B. a little bit in line with me.	D. Very much in line with me	E. Extremely in line with me	B. a little bit in line with me.	B. a little bit in line with me.	A. Not at all.	C. Consistent with my moderate intensity	E. Extremely in line with me	E. Extremely in line with me	No	Yes	Yes	Yes	Yes	Yes	No	No	No	Yes	No	Yes	Yes	Yes	Yes	Extremely in line	Not sure	Extremely in line	Conform	Does not match	Extremely in line	Conform
136	2024/7/1 22:11:53	527 seconds	WeChat	N/A	112	Male	18-20	Undergraduate study	D. High-intensity but not sustained exercise with shortness of breath and a lot of sweating (such as playing badminton, basketball, tennis, football, etc.)	B. 11 to 20 minutes	B. Three to five times a week	C. Sports Dance G. Exercise Machine Activities	E. Extremely in line with me	C. Consistent with my moderate intensity	D. Very much in line with me	D. Very much in line with me	D. Very much in line with me	D. Very much in line with me	D. Very much in line with me	D. Very much in line with me	D. Very much in line with me	D. Very much in line with me	E. Extremely in line with me	E. Extremely in line with me	D. Very much in line with me	E. Extremely in line with me	D. Very much in line with me	Yes	Yes	Yes	No	Yes	Yes	No	Yes	Yes	No	Yes	No	No	Yes	Yes	Not sure	Conform	Conform	Extremely in line	Extremely in line	Does not match	Extremely in line
137	2024/7/1 22:12:02	406 seconds	WeChat	N/A	114	Male	18-20	I'm studying in a specialist	D. High-intensity but not sustained exercise with shortness of breath and a lot of sweating (such as playing badminton, basketball, tennis, football, etc.)	B. 11 to 20 minutes	D. Approximately once a day	C. Dance Sport E. Rope Skipping	D. Very much in line with me	E. Extremely in line with me	D. Very much in line with me	D. Very much in line with me	D. Very much in line with me	D. Very much in line with me	D. Very much in line with me	E. Extremely in line with me	D. Very much in line with me	C. Consistent with my moderate intensity	C. Consistent with my moderate intensity	C. Consistent with my moderate intensity	D. Very much in line with me	E. Extremely in line with me	C. Consistent with my moderate intensity	No	Yes	Yes	Yes	Yes	Yes	Yes	Yes	Yes	Yes	No	Yes	No	Yes	Yes	Conform	Conform	Conform	Not sure	Does not match	Conform	Conform
138	2024/7/1 22:12:09	468 seconds	WeChat	N/A	111	Female	27-29	The doctor is studying	B. Low-intensity and low-tension sports (such as recreational volleyball, table tennis, jogging, Tai Chi, etc.)	D. 31 to 59 minutes	D. Approximately once a day	C. Sports Dance E. Skipping F. Tai Chi and science of health preserving.	E. Extremely in line with me	D. Very much in line with me	D. Very much in line with me	E. Extremely in line with me	D. Very much in line with me	E. Extremely in line with me	D. Very much in line with me	E. Extremely in line with me	D. Very much in line with me	D. Very much in line with me	B. a little bit in line with me.	D. Very much in line with me	C. Consistent with my moderate intensity	D. Very much in line with me	D. Very much in line with me	Yes	Yes	Yes	Yes	No	Yes	Yes	Yes	No	Yes	Yes	Yes	Yes	Yes	Yes	Conform	Extremely in line	Conform	Conform	Does not match	Extremely in line	Not sure
139	2024/7/1 22:12:14	493 seconds	WeChat	N/A	116	Female	18-20	I'm studying in a specialist	B. Low-intensity and low-tension sports (such as recreational volleyball, table tennis, jogging, Tai Chi, etc.)	D. 31 to 59 minutes	D. Approximately once a day	B. Tourism, outings F. Tai Chi, science of health preserving H. Swimming	D. Very much in line with me	E. Extremely in line with me	E. Extremely in line with me	B. a little bit in line with me.	E. Extremely in line with me	D. Very much in line with me	D. Very much in line with me	E. Extremely in line with me	E. Extremely in line with me	C. Consistent with my moderate intensity	D. Very much in line with me	E. Extremely in line with me	D. Very much in line with me	C. Consistent with my moderate intensity	E. Extremely in line with me	Yes	Yes	Yes	Yes	Yes	Yes	Yes	Yes	Yes	Yes	Yes	Yes	Yes	No	No	Extremely in line	Not sure	Conform	Extremely in line	Extremely in line	Conform	Conform
140	2024/7/1 22:12:21	430 seconds	WeChat	N/A	120	Female	27-29	The doctor is studying	C. Moderate intensity and more intense and lasting exercise (such as cycling, running, playing table tennis, etc.)	B. 11 to 20 minutes	E. 1-2 times per week	A. Walking and running C. Sports dance	D. Very much in line with me	E. Extremely in line with me	D. Very much in line with me	E. Extremely in line with me	E. Extremely in line with me	E. Extremely in line with me	D. Very much in line with me	E. Extremely in line with me	D. Very much in line with me	B. a little bit in line with me.	E. Extremely in line with me	E. Extremely in line with me	C. Consistent with my moderate intensity	D. Very much in line with me	D. Very much in line with me	Yes	Yes	Yes	No	Yes	Yes	No	No	Yes	Yes	Yes	No	No	Yes	No	Extremely in line	Extremely in line	Conform	Conform	Extremely in line	Extremely in line	Conform
141	2024/7/1 22:12:27	402 seconds	WeChat	N/A	112	Male	27-29	The doctor is studying	A. Light exercise (such as walking, doing radio gymnastics, playing gateball, etc.)	B. 11 to 20 minutes	E. 1-2 times per week	A. Walking and running B. Travel and outing F. Tai Chi and science of health preserving.	C. Consistent with my moderate intensity	E. Extremely in line with me	D. Very much in line with me	C. Consistent with my moderate intensity	D. Very much in line with me	E. Extremely in line with me	C. Consistent with my moderate intensity	E. Extremely in line with me	E. Extremely in line with me	B. a little bit in line with me.	D. Very much in line with me	E. Extremely in line with me	B. a little bit in line with me.	D. Very much in line with me	D. Very much in line with me	No	Yes	Yes	Yes	Yes	Yes	No	Yes	No	No	Yes	Yes	No	Yes	Yes	Conform	Conform	Extremely in line	Extremely in line	Conform	Conform	Extremely in line
142	2024/7/1 22:12:29	468 seconds	WeChat	N/A	106	Male	18-20	Undergraduate study	B. Low-intensity and low-tension sports (such as recreational volleyball, table tennis, jogging, Tai Chi, etc.)	B. 11 to 20 minutes	C. Two to three times a month	A. Walking and running E. Skipping G. Exercise equipment activities	D. Very much in line with me	D. Very much in line with me	E. Extremely in line with me	D. Very much in line with me	E. Extremely in line with me	E. Extremely in line with me	D. Very much in line with me	E. Extremely in line with me	C. Consistent with my moderate intensity	C. Consistent with my moderate intensity	B. a little bit in line with me.	A. Not at all.	B. a little bit in line with me.	E. Extremely in line with me	D. Very much in line with me	No	No	Yes	Yes	Yes	Yes	No	Yes	Yes	Yes	Yes	Yes	No	Yes	Yes	Extremely in line	Extremely in line	Conform	Extremely in line	Conform	Conform	Conform
143	2024/7/1 22:12:40	492 seconds	WeChat	N/A	109	Female	21-23	I'm studying in a specialist	C. Moderate intensity and more intense and lasting exercise (such as cycling, running, playing table tennis, etc.)	A. Less than 10 minutes	D. Approximately once a day	E. Rope skipping G. Exercise equipment activities	D. Very much in line with me	E. Extremely in line with me	E. Extremely in line with me	E. Extremely in line with me	D. Very much in line with me	D. Very much in line with me	E. Extremely in line with me	C. Consistent with my moderate intensity	E. Extremely in line with me	C. Consistent with my moderate intensity	C. Consistent with my moderate intensity	B. a little bit in line with me.	B. a little bit in line with me.	B. a little bit in line with me.	D. Very much in line with me	Yes	Yes	Yes	Yes	No	Yes	Yes	Yes	Yes	Yes	No	Yes	No	No	No	Conform	Extremely in line	Conform	Extremely in line	Conform	Conform	Conform
144	2024/7/1 22:12:43	515 seconds	WeChat	N/A	117	Female	27-29	The doctor is studying	B. Low-intensity and low-tension sports (such as recreational volleyball, table tennis, jogging, Tai Chi, etc.)	C. 21 to 30 minutes	E. 1-2 times per week	B. Travel, outing E. Skipping G. Fitness equipment activities	D. Very much in line with me	B. a little bit in line with me.	D. Very much in line with me	C. Consistent with my moderate intensity	D. Very much in line with me	B. a little bit in line with me.	D. Very much in line with me	D. Very much in line with me	E. Extremely in line with me	B. a little bit in line with me.	A. Not at all.	E. Extremely in line with me	D. Very much in line with me	E. Extremely in line with me	C. Consistent with my moderate intensity	Yes	Yes	Yes	Yes	No	Yes	No	Yes	Yes	Yes	No	Yes	Yes	Yes	Yes	Conform	Conform	Extremely in line	Conform	Extremely in line	Extremely in line	Conform
145	2024/7/1 22:12:48	505 seconds	WeChat	N/A	109	Male	27-29	The doctor is studying	A. Light exercise (such as walking, doing radio gymnastics, playing gateball, etc.)	C. 21 to 30 minutes	D. Approximately once a day	C. Sports Dance G. Exercise Machine Activities	D. Very much in line with me	D. Very much in line with me	C. Consistent with my moderate intensity	D. Very much in line with me	D. Very much in line with me	E. Extremely in line with me	D. Very much in line with me	D. Very much in line with me	E. Extremely in line with me	D. Very much in line with me	D. Very much in line with me	E. Extremely in line with me	B. a little bit in line with me.	C. Consistent with my moderate intensity	D. Very much in line with me	Yes	Yes	Yes	Yes	No	No	Yes	Yes	Yes	Yes	Yes	Yes	No	No	No	Conform	Extremely in line	Does not match	Extremely in line	Conform	Extremely in line	Conform
146	2024/7/1 22:12:56	380 seconds	WeChat	N/A	108	Female	18-20	Undergraduate study	B. Low-intensity and low-tension sports (such as recreational volleyball, table tennis, jogging, Tai Chi, etc.)	B. 11 to 20 minutes	C. Two to three times a month	A. Walking and running E. Skipping rope	B. a little bit in line with me.	C. Consistent with my moderate intensity	E. Extremely in line with me	E. Extremely in line with me	E. Extremely in line with me	C. Consistent with my moderate intensity	E. Extremely in line with me	E. Extremely in line with me	E. Extremely in line with me	E. Extremely in line with me	D. Very much in line with me	E. Extremely in line with me	D. Very much in line with me	D. Very much in line with me	E. Extremely in line with me	Yes	Yes	No	Yes	No	Yes	Yes	Yes	No	Yes	No	Yes	No	Yes	Yes	Extremely in line	Extremely in line	Conform	Extremely in line	Does not match	Extremely in line	Not sure
147	2024/7/1 22:13:07	407 seconds	WeChat	N/A	108	Female	18-20	Undergraduate study	D. High-intensity but not sustained exercise with shortness of breath and a lot of sweating (such as playing badminton, basketball, tennis, football, etc.)	D. 31 to 59 minutes	D. Approximately once a day	C. Sports Dance D. Ball Games	C. Consistent with my moderate intensity	D. Very much in line with me	D. Very much in line with me	E. Extremely in line with me	C. Consistent with my moderate intensity	D. Very much in line with me	D. Very much in line with me	D. Very much in line with me	E. Extremely in line with me	B. a little bit in line with me.	A. Not at all.	E. Extremely in line with me	A. Not at all.	D. Very much in line with me	D. Very much in line with me	Yes	Yes	Yes	No	Yes	No	Yes	No	Yes	No	Yes	No	No	Yes	Yes	Extremely in line	Does not match	Extremely in line	Conform	Does not match	Conform	Conform
148	2024/7/1 22:13:16	476 seconds	WeChat	N/A	107	Male	21-23	Undergraduate study	B. Low-intensity and low-tension sports (such as recreational volleyball, table tennis, jogging, Tai Chi, etc.)	B. 11 to 20 minutes	B. Three to five times a week	A. Walking and running E. Skipping rope	D. Very much in line with me	D. Very much in line with me	D. Very much in line with me	E. Extremely in line with me	B. a little bit in line with me.	E. Extremely in line with me	D. Very much in line with me	D. Very much in line with me	E. Extremely in line with me	A. Not at all.	C. Consistent with my moderate intensity	A. Not at all.	C. Consistent with my moderate intensity	C. Consistent with my moderate intensity	D. Very much in line with me	Yes	Yes	Yes	No	Yes	Yes	Yes	Yes	Yes	Yes	Yes	Yes	Yes	Yes	Yes	Extremely in line	Extremely in line	Not sure	Extremely in line	Not sure	Conform	Not sure
149	2024/7/1 22:13:42	457 seconds	WeChat	N/A	112	Male	18-20	Undergraduate study	C. Moderate intensity and more intense and lasting exercise (such as cycling, running, playing table tennis, etc.)	D. 31 to 59 minutes	B. Three to five times a week	A. Walking and running E. Skipping rope	E. Extremely in line with me	D. Very much in line with me	D. Very much in line with me	B. a little bit in line with me.	E. Extremely in line with me	E. Extremely in line with me	D. Very much in line with me	D. Very much in line with me	D. Very much in line with me	B. a little bit in line with me.	A. Not at all.	D. Very much in line with me	C. Consistent with my moderate intensity	D. Very much in line with me	C. Consistent with my moderate intensity	Yes	No	Yes	Yes	No	Yes	Yes	Yes	No	Yes	Yes	Yes	Yes	Yes	Yes	Extremely in line	Conform	Extremely in line	Not sure	Extremely in line	Conform	Conform
150	2024/7/1 22:13:52	401 seconds	WeChat	N/A	107	Female	18-20	Undergraduate study	D. High-intensity but not sustained exercise with shortness of breath and a lot of sweating (such as playing badminton, basketball, tennis, football, etc.)	C. 21 to 30 minutes	B. Three to five times a week	C. Sports Dance F. Tai Chi and science of health preserving.	C. Consistent with my moderate intensity	E. Extremely in line with me	E. Extremely in line with me	D. Very much in line with me	D. Very much in line with me	E. Extremely in line with me	E. Extremely in line with me	E. Extremely in line with me	B. a little bit in line with me.	B. a little bit in line with me.	C. Consistent with my moderate intensity	D. Very much in line with me	C. Consistent with my moderate intensity	C. Consistent with my moderate intensity	D. Very much in line with me	Yes	No	Yes	Yes	No	No	Yes	No	Yes	No	Yes	Yes	No	Yes	Yes	Conform	Conform	Conform	Conform	Does not match	Conform	Extremely in line
151	2024/7/1 22:14:04	497 seconds	WeChat	N/A	109	Female	18-20	Undergraduate study	D. High-intensity but not sustained exercise with shortness of breath and a lot of sweating (such as playing badminton, basketball, tennis, football, etc.)	A. Less than 10 minutes	A. Less than once A month	A. Walking and running G. Exercise equipment activities	D. Very much in line with me	E. Extremely in line with me	B. a little bit in line with me.	E. Extremely in line with me	D. Very much in line with me	E. Extremely in line with me	C. Consistent with my moderate intensity	E. Extremely in line with me	B. a little bit in line with me.	E. Extremely in line with me	E. Extremely in line with me	D. Very much in line with me	A. Not at all.	C. Consistent with my moderate intensity	E. Extremely in line with me	Yes	Yes	No	Yes	Yes	Yes	No	Yes	Yes	Yes	No	Yes	No	Yes	Yes	Extremely in line	Extremely in line	Conform	Conform	Extremely in line	Conform	Not sure
152	2024/7/1 22:14:14	421 seconds	WeChat	N/A	109	Male	18-20	Undergraduate study	C. Moderate intensity and more intense and lasting exercise (such as cycling, running, playing table tennis, etc.)	E. More than 60 minutes	C. Two to three times a month	E. Rope skipping F. Tai Chi and science of health preserving.	D. Very much in line with me	E. Extremely in line with me	E. Extremely in line with me	D. Very much in line with me	D. Very much in line with me	D. Very much in line with me	E. Extremely in line with me	E. Extremely in line with me	D. Very much in line with me	E. Extremely in line with me	A. Not at all.	E. Extremely in line with me	C. Consistent with my moderate intensity	D. Very much in line with me	D. Very much in line with me	No	Yes	Yes	No	Yes	No	No	Yes	No	Yes	Yes	Yes	No	Yes	Yes	Not sure	Extremely in line	Extremely in line	Conform	Extremely in line	Conform	Conform
153	2024/7/1 22:14:26	409 seconds	WeChat	N/A	104	Male	21-23	Undergraduate study	C. Moderate intensity and more intense and lasting exercise (such as cycling, running, playing table tennis, etc.)	B. 11 to 20 minutes	C. 2 to 3 times a month	A. Walking and running B. Travel and outing	D. Very much in line with me	E. Extremely in line with me	E. Extremely in line with me	E. Extremely in line with me	D. Very much in line with me	E. Extremely in line with me	B. a little bit in line with me.	E. Extremely in line with me	D. Very much in line with me	A. Not at all.	C. Consistent with my moderate intensity	D. Very much in line with me	C. Consistent with my moderate intensity	D. Very much in line with me	E. Extremely in line with me	No	No	Yes	No	Yes	Yes	Yes	Yes	No	No	No	Yes	No	Yes	No	Conform	Conform	Conform	Extremely in line	Conform	Conform	Extremely in line
154	2024/7/1 22:14:34	508 seconds	WeChat	N/A	105	Male	18-20	Undergraduate study	C. Moderate intensity and more intense and lasting exercise (such as cycling, running, playing table tennis, etc.)	C. 21 to 30 minutes	A. Less than once A month	A. Walking and running E. Skipping G. Exercise equipment activities	E. Extremely in line with me	C. Consistent with my moderate intensity	D. Very much in line with me	D. Very much in line with me	D. Very much in line with me	E. Extremely in line with me	E. Extremely in line with me	E. Extremely in line with me	D. Very much in line with me	D. Very much in line with me	A. Not at all.	D. Very much in line with me	B. a little bit in line with me.	D. Very much in line with me	D. Very much in line with me	Yes	Yes	No	Yes	Yes	Yes	Yes	Yes	Yes	Yes	Yes	Yes	Yes	No	Yes	Conform	Extremely in line	Extremely in line	Conform	Not sure	Not sure	Conform
155	2024/7/1 22:14:45	504 seconds	WeChat	N/A	118	Female	18-20	Undergraduate study	B. Low-intensity and low-tension sports (such as recreational volleyball, table tennis, jogging, Tai Chi, etc.)	C. 21 to 30 minutes	C. Two to three times a month	E. Rope skipping F. Tai Chi and science of health preserving.	E. Extremely in line with me	C. Consistent with my moderate intensity	C. Consistent with my moderate intensity	E. Extremely in line with me	D. Very much in line with me	E. Extremely in line with me	E. Extremely in line with me	E. Extremely in line with me	C. Consistent with my moderate intensity	B. a little bit in line with me.	B. a little bit in line with me.	E. Extremely in line with me	D. Very much in line with me	D. Very much in line with me	E. Extremely in line with me	Yes	No	No	Yes	Yes	Yes	Yes	Yes	Yes	Yes	Yes	Yes	Yes	Yes	Yes	Extremely in line	Extremely in line	Conform	Conform	Conform	Conform	Conform
156	2024/7/1 22:14:58	507 seconds	WeChat	N/A	111	Female	18-20	Undergraduate study	C. Moderate intensity and more intense and lasting exercise (such as cycling, running, playing table tennis, etc.)	C. 21 to 30 minutes	C. 2 to 3 times a month	A. Walking and running G. Exercise equipment activities	B. a little bit in line with me.	D. Very much in line with me	E. Extremely in line with me	E. Extremely in line with me	E. Extremely in line with me	D. Very much in line with me	D. Very much in line with me	E. Extremely in line with me	E. Extremely in line with me	C. Consistent with my moderate intensity	D. Very much in line with me	E. Extremely in line with me	B. a little bit in line with me.	E. Extremely in line with me	E. Extremely in line with me	Yes	No	Yes	Yes	Yes	Yes	No	Yes	Yes	Yes	Yes	Yes	No	No	Yes	Extremely in line	Extremely in line	Does not match	Extremely in line	Does not match	Extremely in line	Conform
157	2024/7/1 22:15:07	385 seconds	WeChat	N/A	103	Male	21-23	Undergraduate study	B. Low-intensity and low-tension sports (such as recreational volleyball, table tennis, jogging, Tai Chi, etc.)	A. Less than 10 minutes	C. Two to three times a month	A. Walking and running G. Exercise equipment activities	E. Extremely in line with me	C. Consistent with my moderate intensity	E. Extremely in line with me	E. Extremely in line with me	E. Extremely in line with me	D. Very much in line with me	D. Very much in line with me	C. Consistent with my moderate intensity	C. Consistent with my moderate intensity	B. a little bit in line with me.	C. Consistent with my moderate intensity	E. Extremely in line with me	C. Consistent with my moderate intensity	D. Very much in line with me	D. Very much in line with me	No	No	Yes	Yes	Yes	No	Yes	Yes	No	Yes	No	No	No	Yes	No	Conform	Conform	Conform	Conform	Does not match	Conform	Conform
158	2024/7/1 22:15:17	540 seconds	WeChat	N/A	120	Female	18-20	Undergraduate study	B. Low-intensity and low-tension sports (such as recreational volleyball, table tennis, jogging, Tai Chi, etc.)	D. 31 to 59 minutes	E. 1-2 times per week	A. Walking and running C. Sports dance E. Skipping rope	D. Very much in line with me	E. Extremely in line with me	D. Very much in line with me	E. Extremely in line with me	D. Very much in line with me	E. Extremely in line with me	D. Very much in line with me	C. Consistent with my moderate intensity	E. Extremely in line with me	B. a little bit in line with me.	D. Very much in line with me	E. Extremely in line with me	D. Very much in line with me	D. Very much in line with me	D. Very much in line with me	No	Yes	Yes	No	Yes	Yes	Yes	Yes	Yes	Yes	Yes	Yes	No	Yes	Yes	Extremely in line	Extremely in line	Extremely in line	Extremely in line	Not sure	Conform	Not sure
159	2024/7/1 22:15:36	486 seconds	WeChat	N/A	115	Female	18-20	Undergraduate study	C. Moderate intensity and more intense and lasting exercise (such as cycling, running, playing table tennis, etc.)	D. 31 to 59 minutes	C. 2 to 3 times a month	A. Walking and running E. Skipping rope I. Others	E. Extremely in line with me	D. Very much in line with me	D. Very much in line with me	D. Very much in line with me	D. Very much in line with me	C. Consistent with my moderate intensity	E. Extremely in line with me	E. Extremely in line with me	D. Very much in line with me	C. Consistent with my moderate intensity	C. Consistent with my moderate intensity	D. Very much in line with me	C. Consistent with my moderate intensity	C. Consistent with my moderate intensity	E. Extremely in line with me	No	Yes	Yes	No	Yes	Yes	Yes	Yes	Yes	Yes	Yes	No	No	Yes	Yes	Conform	Conform	Extremely in line	Does not match	Conform	Extremely in line	Conform
160	2024/7/1 22:15:48	446 seconds	WeChat	N/A	107	Female	21-23	Undergraduate study	B. Low-intensity and low-tension sports (such as recreational volleyball, table tennis, jogging, Tai Chi, etc.)	C. 21 to 30 minutes	B. Three to five times a week	A. Walking and running G. Exercise equipment activities	B. a little bit in line with me.	D. Very much in line with me	E. Extremely in line with me	D. Very much in line with me	C. Consistent with my moderate intensity	B. a little bit in line with me.	D. Very much in line with me	D. Very much in line with me	D. Very much in line with me	E. Extremely in line with me	B. a little bit in line with me.	C. Consistent with my moderate intensity	B. a little bit in line with me.	D. Very much in line with me	D. Very much in line with me	Yes	Yes	Yes	Yes	Yes	Yes	No	Yes	Yes	Yes	Yes	Yes	No	No	Yes	Extremely in line	Extremely in line	Extremely in line	Conform	Extremely in line	Extremely in line	Conform
161	2024/7/1 23:11:34	114 seconds	WeChat	N/A	99	Female	18-20	Undergraduate study	A. Light exercise (such as walking, doing radio gymnastics, playing gateball, etc.)	E. More than 60 minutes	B. Three to five times a week	A. Walking and running B. Travel and outing E. Skipping rope	C. Consistent with my moderate intensity	B. a little bit in line with me.	B. a little bit in line with me.	B. a little bit in line with me.	B. a little bit in line with me.	C. Consistent with my moderate intensity	C. Consistent with my moderate intensity	C. Consistent with my moderate intensity	C. Consistent with my moderate intensity	D. Very much in line with me	B. a little bit in line with me.	C. Consistent with my moderate intensity	C. Consistent with my moderate intensity	C. Consistent with my moderate intensity	C. Consistent with my moderate intensity	Yes	Yes	No	Yes	Yes	Yes	Yes	Yes	Yes	Yes	Yes	Yes	Yes	Yes	Yes	Conform	Conform	Not sure	Not sure	Not sure	Conform	Conform
162	2024/7/1 23:26:51	235 seconds	WeChat	N/A	103	Female	24-26	I'm studying for a master's degree	A. Light exercise (such as walking, doing radio gymnastics, playing gateball, etc.)	B. 11 to 20 minutes	E. 1-2 times per week	B. Tourism and outing C. Sports dance	A. Not at all.	D. Very much in line with me	A. Not at all.	C. Consistent with my moderate intensity	A. Not at all.	C. Consistent with my moderate intensity	A. Not at all.	D. Very much in line with me	D. Very much in line with me	B. a little bit in line with me.	D. Very much in line with me	C. Consistent with my moderate intensity	D. Very much in line with me	D. Very much in line with me	A. Not at all.	Yes	Yes	No	Yes	Yes	Yes	Yes	Yes	Yes	No	Yes	Yes	No	No	No	Conform	Conform	Not sure	Not sure	Not sure	Conform	Conform
163	2024/7/2 8:30:53	157 seconds	Mobile submission	Direct access	107	Female	24-26	I'm studying for a master's degree	B. Low-intensity and low-tension sports (such as recreational volleyball, table tennis, jogging, Tai Chi, etc.)	B. 11 to 20 minutes	E. 1-2 times per week	A. Walking and running B. Travel and outing E. Skipping rope	A. Not at all.	B. a little bit in line with me.	C. Consistent with my moderate intensity	D. Very much in line with me	C. Consistent with my moderate intensity	B. a little bit in line with me.	A. Not at all.	C. Consistent with my moderate intensity	E. Extremely in line with me	C. Consistent with my moderate intensity	C. Consistent with my moderate intensity	D. Very much in line with me	C. Consistent with my moderate intensity	E. Extremely in line with me	B. a little bit in line with me.	Yes	Yes	No	Yes	Yes	Yes	Yes	Yes	Yes	Yes	Yes	Yes	No	No	No	Extremely in line	Conform	Conform	Not sure	Conform	Extremely in line	Conform
164	2024/7/2 8:49:44	257 seconds	WeChat	N/A	114	Male	18-20	I'm studying in a specialist	B. Low-intensity and low-tension sports (such as recreational volleyball, table tennis, jogging, Tai Chi, etc.)	B. 11 to 20 minutes	A. Less than once A month	C. Sports Dance D. Ball Games E. Skipping Rope	C. Consistent with my moderate intensity	E. Extremely in line with me	B. a little bit in line with me.	D. Very much in line with me	C. Consistent with my moderate intensity	B. a little bit in line with me.	D. Very much in line with me	E. Extremely in line with me	E. Extremely in line with me	D. Very much in line with me	E. Extremely in line with me	D. Very much in line with me	E. Extremely in line with me	E. Extremely in line with me	B. a little bit in line with me.	Yes	No	No	Yes	No	No	No	Yes	Yes	Yes	No	No	Yes	No	No	Extremely in line	Not sure	Extremely in line	Conform	Conform	Conform	Conform
165	2024/7/2 8:50:15	405 seconds	WeChat	N/A	116	Female	21-23	Undergraduate study	B. Low-intensity and low-tension sports (such as recreational volleyball, table tennis, jogging, Tai Chi, etc.)	B. 11 to 20 minutes	C. Two to three times a month	A. Walking and running D. Ball games	D. Very much in line with me	E. Extremely in line with me	B. a little bit in line with me.	E. Extremely in line with me	D. Very much in line with me	B. a little bit in line with me.	D. Very much in line with me	C. Consistent with my moderate intensity	E. Extremely in line with me	D. Very much in line with me	D. Very much in line with me	D. Very much in line with me	E. Extremely in line with me	C. Consistent with my moderate intensity	B. a little bit in line with me.	No	No	Yes	No	No	Yes	No	Yes	No	Yes	No	No	No	No	Yes	Extremely in line	Extremely in line	Conform	Extremely in line	Not sure	Conform	Extremely in line
166	2024/7/2 8:50:50	291 seconds	WeChat	N/A	65	Male	24-26	I'm studying for a master's degree	D. High-intensity but not sustained exercise with shortness of breath and a lot of sweating (such as playing badminton, basketball, tennis, football, etc.)	B. 11 to 20 minutes	E. 1-2 times per week	B. Tourism and outing C. Sports dance D. Ball games	B. a little bit in line with me.	B. a little bit in line with me.	E. Extremely in line with me	C. Consistent with my moderate intensity	B. a little bit in line with me.	D. Very much in line with me	A. Not at all.	A. Not at all.	B. a little bit in line with me.	B. a little bit in line with me.	A. Not at all.	A. Not at all.	B. a little bit in line with me.	B. a little bit in line with me.	D. Very much in line with me	Yes	No	No	Yes	No	Yes	No	Yes	Yes	No	No	Yes	Yes	Yes	No	Extremely inconsistent	Does not match	Does not match	Not sure	Extremely inconsistent	Does not match	Does not match
167	2024/7/2 8:51:16	279 seconds	WeChat	N/A	117	Female	21-23	Undergraduate study	B. Low-intensity and low-tension sports (such as recreational volleyball, table tennis, jogging, Tai Chi, etc.)	C. 21 to 30 minutes	B. Three to five times a week	A. Walking and running B. Travel and outing	C. Consistent with my moderate intensity	E. Extremely in line with me	A. Not at all.	D. Very much in line with me	C. Consistent with my moderate intensity	A. Not at all.	E. Extremely in line with me	E. Extremely in line with me	C. Consistent with my moderate intensity	C. Consistent with my moderate intensity	E. Extremely in line with me	D. Very much in line with me	D. Very much in line with me	D. Very much in line with me	A. Not at all.	No	No	No	Yes	No	No	Yes	No	No	No	No	No	Yes	No	No	Extremely in line	Extremely in line	Extremely in line	Conform	Extremely in line	Conform	Extremely in line
168	2024/7/2 8:51:58	395 seconds	WeChat	N/A	63	Male	24-26	I'm studying for a master's degree	A. Light exercise (such as walking, doing radio gymnastics, playing gateball, etc.)	C. 21 to 30 minutes	B. Three to five times a week	A. Walking and running B. Travel and outing F. Tai Chi and science of health preserving.	A. Not at all.	B. a little bit in line with me.	D. Very much in line with me	C. Consistent with my moderate intensity	A. Not at all.	D. Very much in line with me	A. Not at all.	B. a little bit in line with me.	C. Consistent with my moderate intensity	C. Consistent with my moderate intensity	B. a little bit in line with me.	B. a little bit in line with me.	A. Not at all.	A. Not at all.	D. Very much in line with me	Yes	No	Yes	No	Yes	No	Yes	No	No	Yes	Yes	Yes	Yes	No	No	Extremely inconsistent	Not sure	Not sure	Does not match	Does not match	Does not match	Does not match
169	2024/7/2 8:52:47	396 seconds	WeChat	N/A	124	Female	18-20	I'm studying in a specialist	B. Low-intensity and low-tension sports (such as recreational volleyball, table tennis, jogging, Tai Chi, etc.)	C. 21 to 30 minutes	C. Two to three times a month	C. Sports Dance D. Ball Games	D. Very much in line with me	D. Very much in line with me	A. Not at all.	D. Very much in line with me	E. Extremely in line with me	A. Not at all.	D. Very much in line with me	C. Consistent with my moderate intensity	E. Extremely in line with me	D. Very much in line with me	E. Extremely in line with me	D. Very much in line with me	D. Very much in line with me	D. Very much in line with me	A. Not at all.	No	No	Yes	Yes	Yes	Yes	Yes	No	Yes	No	Yes	Yes	Yes	No	Yes	Conform	Conform	Extremely in line	Extremely in line	Conform	Extremely in line	Not sure
170	2024/7/2 8:53:35	268 seconds	WeChat	N/A	124	Female	21-23	Undergraduate study	A. Light exercise (such as walking, doing radio gymnastics, playing gateball, etc.)	B. 11 to 20 minutes	B. Three to five times a week	A. Walking and running C. Sports dance E. Skipping rope	D. Very much in line with me	D. Very much in line with me	A. Not at all.	E. Extremely in line with me	E. Extremely in line with me	B. a little bit in line with me.	C. Consistent with my moderate intensity	E. Extremely in line with me	E. Extremely in line with me	D. Very much in line with me	D. Very much in line with me	D. Very much in line with me	E. Extremely in line with me	E. Extremely in line with me	B. a little bit in line with me.	No	No	Yes	No	Yes	Yes	No	Yes	Yes	No	No	Yes	Yes	Yes	No	Extremely in line	Not sure	Extremely in line	Extremely in line	Extremely in line	Extremely in line	Extremely in line
171	2024/7/2 8:54:17	285 seconds	WeChat	N/A	58	Male	24-26	I'm studying for a master's degree	A. Light exercise (such as walking, doing radio gymnastics, playing gateball, etc.)	A. Less than 10 minutes	D. Approximately once a day	A. Walking, running B. Travel, outing I. Others	A. Not at all.	B. a little bit in line with me.	D. Very much in line with me	B. a little bit in line with me.	B. a little bit in line with me.	D. Very much in line with me	A. Not at all.	B. a little bit in line with me.	C. Consistent with my moderate intensity	B. a little bit in line with me.	B. a little bit in line with me.	A. Not at all.	B. a little bit in line with me.	B. a little bit in line with me.	E. Extremely in line with me	No	No	No	Yes	No	Yes	No	No	Yes	Yes	No	Yes	Yes	Yes	Yes	Does not match	Not sure	Extremely inconsistent	Extremely inconsistent	Extremely inconsistent	Extremely inconsistent	Extremely inconsistent
172	2024/7/2 8:55:06	313 seconds	WeChat	N/A	113	Male	21-23	Undergraduate study	E. High-intensity and sustained exercise with shortness of breath and a lot of sweating (such as running, aerobics sets, swimming, etc.)	B. 11 to 20 minutes	C. 2 to 3 times a month	A. Walking and running C. Sports dance	C. Consistent with my moderate intensity	E. Extremely in line with me	A. Not at all.	C. Consistent with my moderate intensity	D. Very much in line with me	C. Consistent with my moderate intensity	C. Consistent with my moderate intensity	D. Very much in line with me	D. Very much in line with me	E. Extremely in line with me	D. Very much in line with me	D. Very much in line with me	C. Consistent with my moderate intensity	C. Consistent with my moderate intensity	A. Not at all.	No	Yes	Yes	No	No	Yes	No	Yes	No	No	No	No	No	Yes	No	Conform	Extremely in line	Extremely in line	Not sure	Conform	Extremely in line	Extremely in line
173	2024/7/2 8:55:51	323 seconds	WeChat	N/A	121	Male	21-23	Undergraduate study	C. Moderate intensity and more intense and lasting exercise (such as cycling, running, playing table tennis, etc.)	B. 11 to 20 minutes	A. Less than once A month	A. Walking and running B. Travel and outing F. Tai Chi and science of health preserving.	D. Very much in line with me	D. Very much in line with me	B. a little bit in line with me.	E. Extremely in line with me	E. Extremely in line with me	A. Not at all.	E. Extremely in line with me	D. Very much in line with me	C. Consistent with my moderate intensity	D. Very much in line with me	D. Very much in line with me	E. Extremely in line with me	E. Extremely in line with me	E. Extremely in line with me	A. Not at all.	No	No	Yes	Yes	No	Yes	No	No	No	Yes	Yes	No	No	Yes	Yes	Conform	Extremely in line	Conform	Conform	Conform	Extremely in line	Extremely in line
174	2024/7/2 8:56:24	282 seconds	WeChat	N/A	65	Female	24-26	I'm studying for a master's degree	C. Moderate intensity and more intense and lasting exercise (such as cycling, running, playing table tennis, etc.)	B. 11 to 20 minutes	B. Three to five times a week	A. Walking, running B. Travel, outing C. Sports dance	A. Not at all.	B. a little bit in line with me.	E. Extremely in line with me	C. Consistent with my moderate intensity	B. a little bit in line with me.	D. Very much in line with me	B. a little bit in line with me.	A. Not at all.	A. Not at all.	A. Not at all.	B. a little bit in line with me.	B. a little bit in line with me.	A. Not at all.	A. Not at all.	D. Very much in line with me	Yes	Yes	Yes	Yes	Yes	No	No	Yes	Yes	Yes	No	No	Yes	Yes	No	Does not match	Does not match	Does not match	Not sure	Does not match	Extremely inconsistent	Not sure
175	2024/7/2 8:57:08	385 seconds	WeChat	N/A	111	Male	18-20	Undergraduate study	A. Light exercise (such as walking, doing radio gymnastics, playing gateball, etc.)	B. 11 to 20 minutes	B. Three to five times a week	B. Travel and outing C. Sports dance E. Skipping rope	E. Extremely in line with me	D. Very much in line with me	A. Not at all.	C. Consistent with my moderate intensity	E. Extremely in line with me	B. a little bit in line with me.	D. Very much in line with me	D. Very much in line with me	E. Extremely in line with me	E. Extremely in line with me	D. Very much in line with me	D. Very much in line with me	E. Extremely in line with me	D. Very much in line with me	B. a little bit in line with me.	Yes	No	No	Yes	Yes	No	No	No	Yes	No	No	No	No	No	Yes	Conform	Conform	Not sure	Conform	Extremely in line	Conform	Conform
176	2024/7/2 8:57:44	331 seconds	WeChat	N/A	60	Male	24-26	I'm studying for a master's degree	C. Moderate intensity and more intense and lasting exercise (such as cycling, running, playing table tennis, etc.)	A. Less than 10 minutes	B. Three to five times a week	B. Travel, outing C. Sports dance D. Ball games G. Fitness equipment activities	C. Consistent with my moderate intensity	B. a little bit in line with me.	E. Extremely in line with me	B. a little bit in line with me.	A. Not at all.	D. Very much in line with me	B. a little bit in line with me.	A. Not at all.	B. a little bit in line with me.	C. Consistent with my moderate intensity	A. Not at all.	A. Not at all.	C. Consistent with my moderate intensity	A. Not at all.	E. Extremely in line with me	Yes	Yes	No	Yes	No	Yes	Yes	Yes	No	Yes	Yes	Yes	No	Yes	Yes	Does not match	Extremely inconsistent	Not sure	Does not match	Extremely inconsistent	Not sure	Extremely inconsistent
177	2024/7/2 8:58:26	283 seconds	WeChat	N/A	124	Male	21-23	Undergraduate study	C. Moderate intensity and more intense and lasting exercise (such as cycling, running, playing table tennis, etc.)	B. 11 to 20 minutes	D. Approximately once a day	C. Dance Sport D. Ball Games I. Others	D. Very much in line with me	E. Extremely in line with me	B. a little bit in line with me.	C. Consistent with my moderate intensity	D. Very much in line with me	A. Not at all.	E. Extremely in line with me	E. Extremely in line with me	E. Extremely in line with me	E. Extremely in line with me	D. Very much in line with me	D. Very much in line with me	E. Extremely in line with me	C. Consistent with my moderate intensity	B. a little bit in line with me.	Yes	Yes	No	Yes	Yes	Yes	Yes	No	Yes	Yes	Yes	Yes	Yes	Yes	Yes	Conform	Extremely in line	Conform	Not sure	Conform	Extremely in line	Extremely in line
178	2024/7/2 8:59:19	378 seconds	WeChat	N/A	62	Female	27-29	The doctor is studying	E. High-intensity and sustained exercise with shortness of breath and a lot of sweating (such as running, aerobics sets, swimming, etc.)	D. 31 to 59 minutes	A. Less than once A month	A. Walking, running B. Travel, outing C. Sports dance	B. a little bit in line with me.	A. Not at all.	E. Extremely in line with me	A. Not at all.	C. Consistent with my moderate intensity	D. Very much in line with me	C. Consistent with my moderate intensity	A. Not at all.	A. Not at all.	A. Not at all.	B. a little bit in line with me.	B. a little bit in line with me.	C. Consistent with my moderate intensity	B. a little bit in line with me.	E. Extremely in line with me	Yes	Yes	Yes	No	Yes	No	No	No	Yes	Yes	Yes	Yes	No	No	Yes	Does not match	Extremely inconsistent	Extremely inconsistent	Extremely inconsistent	Extremely inconsistent	Extremely inconsistent	Extremely inconsistent
179	2024/7/2 8:59:52	404 seconds	WeChat	N/A	119	Female	18-20	Undergraduate study	B. Low-intensity and low-tension sports (such as recreational volleyball, table tennis, jogging, Tai Chi, etc.)	A. Less than 10 minutes	B. Three to five times a week	A. Walking and running C. Sports dance E. Skipping rope	E. Extremely in line with me	E. Extremely in line with me	A. Not at all.	E. Extremely in line with me	E. Extremely in line with me	A. Not at all.	E. Extremely in line with me	E. Extremely in line with me	D. Very much in line with me	D. Very much in line with me	C. Consistent with my moderate intensity	D. Very much in line with me	D. Very much in line with me	E. Extremely in line with me	A. Not at all.	No	Yes	Yes	Yes	Yes	No	No	No	No	Yes	No	No	No	Yes	Yes	Not sure	Conform	Not sure	Conform	Conform	Extremely in line	Extremely in line
180	2024/7/2 9:00:33	347 seconds	WeChat	N/A	125	Male	21-23	Undergraduate study	D. High-intensity but not sustained exercise with shortness of breath and a lot of sweating (such as playing badminton, basketball, tennis, football, etc.)	C. 21 to 30 minutes	D. Approximately once a day	A. Walking and running D. Ball games	E. Extremely in line with me	E. Extremely in line with me	B. a little bit in line with me.	E. Extremely in line with me	E. Extremely in line with me	A. Not at all.	E. Extremely in line with me	E. Extremely in line with me	D. Very much in line with me	E. Extremely in line with me	D. Very much in line with me	D. Very much in line with me	E. Extremely in line with me	C. Consistent with my moderate intensity	B. a little bit in line with me.	Yes	No	Yes	No	No	No	No	No	Yes	No	No	No	Yes	No	No	Extremely in line	Conform	Conform	Conform	Conform	Extremely in line	Extremely in line
181	2024/7/2 9:01:19	304 seconds	WeChat	N/A	119	Male	21-23	Undergraduate study	A. Light exercise (such as walking, doing radio gymnastics, playing gateball, etc.)	B. 11 to 20 minutes	A. Less than once A month	D. Ball games E. Rope skipping	D. Very much in line with me	C. Consistent with my moderate intensity	B. a little bit in line with me.	E. Extremely in line with me	E. Extremely in line with me	B. a little bit in line with me.	E. Extremely in line with me	D. Very much in line with me	D. Very much in line with me	C. Consistent with my moderate intensity	D. Very much in line with me	E. Extremely in line with me	D. Very much in line with me	C. Consistent with my moderate intensity	B. a little bit in line with me.	No	Yes	No	Yes	Yes	Yes	Yes	No	Yes	Yes	No	No	No	Yes	No	Extremely in line	Extremely in line	Extremely in line	Extremely in line	Conform	Extremely in line	Extremely in line
182	2024/7/2 9:01:53	372 seconds	WeChat	N/A	116	Male	18-20	Undergraduate study	B. Low-intensity and low-tension sports (such as recreational volleyball, table tennis, jogging, Tai Chi, etc.)	C. 21 to 30 minutes	C. Two to three times a month	A. Walking and running D. Ball games	D. Very much in line with me	E. Extremely in line with me	B. a little bit in line with me.	E. Extremely in line with me	E. Extremely in line with me	B. a little bit in line with me.	D. Very much in line with me	C. Consistent with my moderate intensity	D. Very much in line with me	C. Consistent with my moderate intensity	C. Consistent with my moderate intensity	C. Consistent with my moderate intensity	C. Consistent with my moderate intensity	E. Extremely in line with me	C. Consistent with my moderate intensity	Yes	Yes	No	Yes	No	No	No	Yes	No	Yes	Yes	Yes	Yes	Yes	No	Not sure	Extremely in line	Conform	Conform	Extremely in line	Conform	Extremely in line
183	2024/7/2 9:02:41	259 seconds	WeChat	N/A	116	Male	18-20	Undergraduate study	A. Light exercise (such as walking, doing radio gymnastics, playing gateball, etc.)	D. 31 to 59 minutes	B. Three to five times a week	D. Ball games E. Skipping F. Tai Chi and science of health preserving.	D. Very much in line with me	D. Very much in line with me	B. a little bit in line with me.	E. Extremely in line with me	E. Extremely in line with me	B. a little bit in line with me.	C. Consistent with my moderate intensity	D. Very much in line with me	D. Very much in line with me	E. Extremely in line with me	D. Very much in line with me	D. Very much in line with me	E. Extremely in line with me	C. Consistent with my moderate intensity	B. a little bit in line with me.	Yes	Yes	No	Yes	Yes	No	Yes	Yes	No	Yes	No	No	Yes	No	No	Conform	Conform	Extremely in line	Not sure	Extremely in line	Extremely in line	Conform
184	2024/7/2 9:03:23	395 seconds	WeChat	N/A	126	Female	21-23	I'm studying in a specialist	C. Moderate intensity and more intense and lasting exercise (such as cycling, running, playing table tennis, etc.)	A. Less than 10 minutes	A. Less than once A month	A. Walking and running D. Ball games	D. Very much in line with me	E. Extremely in line with me	B. a little bit in line with me.	E. Extremely in line with me	E. Extremely in line with me	A. Not at all.	D. Very much in line with me	E. Extremely in line with me	E. Extremely in line with me	D. Very much in line with me	D. Very much in line with me	D. Very much in line with me	E. Extremely in line with me	D. Very much in line with me	A. Not at all.	Yes	Yes	Yes	Yes	Yes	Yes	No	Yes	No	No	No	Yes	Yes	No	No	Conform	Extremely in line	Extremely in line	Extremely in line	Extremely in line	Conform	Extremely in line
185	2024/7/2 9:04:12	333 seconds	WeChat	N/A	125	Male	21-23	I'm studying in a specialist	E. High-intensity and sustained exercise with shortness of breath and a lot of sweating (such as running, aerobics sets, swimming, etc.)	D. 31 to 59 minutes	A. Less than once A month	B. Travel and outing C. Sports dance E. Skipping rope	D. Very much in line with me	E. Extremely in line with me	B. a little bit in line with me.	E. Extremely in line with me	D. Very much in line with me	A. Not at all.	C. Consistent with my moderate intensity	E. Extremely in line with me	D. Very much in line with me	E. Extremely in line with me	E. Extremely in line with me	E. Extremely in line with me	E. Extremely in line with me	E. Extremely in line with me	C. Consistent with my moderate intensity	Yes	Yes	Yes	No	Yes	No	Yes	No	Yes	No	Yes	No	No	No	No	Extremely in line	Conform	Conform	Not sure	Conform	Extremely in line	Extremely in line
186	2024/7/2 9:04:58	307 seconds	WeChat	N/A	125	Male	18-20	Undergraduate study	B. Low-intensity and low-tension sports (such as recreational volleyball, table tennis, jogging, Tai Chi, etc.)	C. 21 to 30 minutes	E. 1-2 times per week	D. Ball games E. Rope skipping	E. Extremely in line with me	E. Extremely in line with me	B. a little bit in line with me.	D. Very much in line with me	D. Very much in line with me	A. Not at all.	E. Extremely in line with me	D. Very much in line with me	D. Very much in line with me	D. Very much in line with me	D. Very much in line with me	E. Extremely in line with me	C. Consistent with my moderate intensity	D. Very much in line with me	C. Consistent with my moderate intensity	Yes	Yes	No	Yes	Yes	No	Yes	No	Yes	Yes	Yes	Yes	Yes	Yes	No	Not sure	Conform	Conform	Extremely in line	Extremely in line	Extremely in line	Extremely in line
187	2024/7/2 9:05:34	389 seconds	WeChat	N/A	118	Female	21-23	I'm studying in a specialist	D. High-intensity but not sustained exercise with shortness of breath and a lot of sweating (such as playing badminton, basketball, tennis, football, etc.)	B. 11 to 20 minutes	A. Less than once A month	D. Ball games E. Skipping F. Tai Chi and science of health preserving.	C. Consistent with my moderate intensity	D. Very much in line with me	A. Not at all.	D. Very much in line with me	D. Very much in line with me	B. a little bit in line with me.	C. Consistent with my moderate intensity	D. Very much in line with me	C. Consistent with my moderate intensity	E. Extremely in line with me	E. Extremely in line with me	E. Extremely in line with me	D. Very much in line with me	D. Very much in line with me	B. a little bit in line with me.	Yes	Yes	Yes	No	Yes	Yes	No	Yes	Yes	Yes	Yes	No	Yes	Yes	No	Conform	Conform	Conform	Extremely in line	Not sure	Conform	Conform
188	2024/7/2 9:05:56	398 seconds	WeChat	N/A	61	Male	27-29	The doctor is studying	E. High-intensity and sustained exercise with shortness of breath and a lot of sweating (such as running, aerobics sets, swimming, etc.)	C. 21 to 30 minutes	B. Three to five times a week	A. Walking and running B. Travel and outing	B. a little bit in line with me.	B. a little bit in line with me.	C. Consistent with my moderate intensity	C. Consistent with my moderate intensity	B. a little bit in line with me.	E. Extremely in line with me	A. Not at all.	C. Consistent with my moderate intensity	B. a little bit in line with me.	B. a little bit in line with me.	B. a little bit in line with me.	B. a little bit in line with me.	B. a little bit in line with me.	B. a little bit in line with me.	E. Extremely in line with me	Yes	Yes	No	Yes	No	No	No	Yes	No	No	No	No	Yes	No	No	Extremely inconsistent	Extremely inconsistent	Does not match	Does not match	Does not match	Extremely inconsistent	Does not match
189	2024/7/2 9:06:29	395 seconds	WeChat	N/A	69	Female	24-26	I'm studying for a master's degree	E. High-intensity and sustained exercise with shortness of breath and a lot of sweating (such as running, aerobics sets, swimming, etc.)	C. 21 to 30 minutes	E. 1-2 times per week	B. Travel, outing G. Fitness equipment activities	B. a little bit in line with me.	A. Not at all.	E. Extremely in line with me	B. a little bit in line with me.	B. a little bit in line with me.	C. Consistent with my moderate intensity	C. Consistent with my moderate intensity	A. Not at all.	B. a little bit in line with me.	A. Not at all.	A. Not at all.	C. Consistent with my moderate intensity	B. a little bit in line with me.	B. a little bit in line with me.	D. Very much in line with me	No	Yes	No	Yes	Yes	No	No	No	Yes	No	Yes	No	No	No	No	Does not match	Not sure	Extremely inconsistent	Does not match	Extremely inconsistent	Not sure	Does not match
190	2024/7/2 9:07:14	303 seconds	WeChat	N/A	112	Male	21-23	Undergraduate study	A. Light exercise (such as walking, doing radio gymnastics, playing gateball, etc.)	B. 11 to 20 minutes	A. Less than once A month	A. Walking, running B. Travel, outing C. Sports dance	D. Very much in line with me	D. Very much in line with me	A. Not at all.	C. Consistent with my moderate intensity	E. Extremely in line with me	B. a little bit in line with me.	D. Very much in line with me	E. Extremely in line with me	D. Very much in line with me	E. Extremely in line with me	C. Consistent with my moderate intensity	D. Very much in line with me	C. Consistent with my moderate intensity	D. Very much in line with me	B. a little bit in line with me.	No	No	Yes	No	No	No	No	Yes	No	No	Yes	No	Yes	Yes	Yes	Conform	Extremely in line	Extremely in line	Extremely in line	Conform	Extremely in line	Conform
191	2024/7/2 9:07:39	257 seconds	WeChat	N/A	56	Male	24-26	I'm studying for a master's degree	B. Low-intensity and low-tension sports (such as recreational volleyball, table tennis, jogging, Tai Chi, etc.)	C. 21 to 30 minutes	A. Less than once A month	A. Walking, running B. Travel, outing C. Sports dance	B. a little bit in line with me.	A. Not at all.	E. Extremely in line with me	A. Not at all.	A. Not at all.	D. Very much in line with me	B. a little bit in line with me.	B. a little bit in line with me.	A. Not at all.	A. Not at all.	A. Not at all.	A. Not at all.	B. a little bit in line with me.	A. Not at all.	E. Extremely in line with me	Yes	No	Yes	Yes	Yes	No	Yes	Yes	No	No	Yes	No	No	Yes	Yes	Does not match	Does not match	Extremely inconsistent	Not sure	Does not match	Extremely inconsistent	Extremely inconsistent
192	2024/7/2 9:08:25	360 seconds	WeChat	N/A	123	Female	18-20	Undergraduate study	A. Light exercise (such as walking, doing radio gymnastics, playing gateball, etc.)	C. 21 to 30 minutes	E. 1-2 times per week	B. Travel, outings G. Fitness equipment activities I. Others	C. Consistent with my moderate intensity	E. Extremely in line with me	C. Consistent with my moderate intensity	E. Extremely in line with me	D. Very much in line with me	A. Not at all.	E. Extremely in line with me	E. Extremely in line with me	D. Very much in line with me	E. Extremely in line with me	D. Very much in line with me	D. Very much in line with me	E. Extremely in line with me	E. Extremely in line with me	B. a little bit in line with me.	Yes	No	No	Yes	Yes	Yes	Yes	No	Yes	Yes	Yes	Yes	Yes	Yes	Yes	Conform	Conform	Not sure	Conform	Conform	Conform	Conform
193	2024/7/2 9:08:58	288 seconds	WeChat	N/A	59	Female	27-29	The doctor is studying	C. Moderate intensity and more intense and lasting exercise (such as cycling, running, playing table tennis, etc.)	B. 11 to 20 minutes	A. Less than once A month	C. Sports Dance F. Tai Chi and science of health preserving.	A. Not at all.	C. Consistent with my moderate intensity	E. Extremely in line with me	B. a little bit in line with me.	B. a little bit in line with me.	E. Extremely in line with me	B. a little bit in line with me.	B. a little bit in line with me.	C. Consistent with my moderate intensity	B. a little bit in line with me.	B. a little bit in line with me.	A. Not at all.	B. a little bit in line with me.	A. Not at all.	E. Extremely in line with me	Yes	No	No	Yes	Yes	Yes	Yes	Yes	No	Yes	No	No	Yes	Yes	Yes	Extremely inconsistent	Does not match	Extremely inconsistent	Does not match	Extremely inconsistent	Does not match	Extremely inconsistent
194	2024/7/2 9:09:43	403 seconds	WeChat	N/A	117	Female	18-20	Undergraduate study	A. Light exercise (such as walking, doing radio gymnastics, playing gateball, etc.)	B. 11 to 20 minutes	A. Less than once A month	B. Tourism and outing D. Ball games	E. Extremely in line with me	D. Very much in line with me	C. Consistent with my moderate intensity	D. Very much in line with me	E. Extremely in line with me	B. a little bit in line with me.	E. Extremely in line with me	E. Extremely in line with me	E. Extremely in line with me	E. Extremely in line with me	D. Very much in line with me	E. Extremely in line with me	C. Consistent with my moderate intensity	D. Very much in line with me	B. a little bit in line with me.	No	No	Yes	Yes	Yes	No	Yes	Yes	Yes	No	Yes	Yes	No	No	No	Extremely in line	Conform	Conform	Not sure	Extremely in line	Conform	Conform
195	2024/7/2 9:10:12	295 seconds	WeChat	N/A	63	Male	27-29	The doctor is studying	C. Moderate intensity and more intense and lasting exercise (such as cycling, running, playing table tennis, etc.)	B. 11 to 20 minutes	C. Two to three times a month	A. Walking and running B. Travel and outing F. Tai Chi and science of health preserving.	A. Not at all.	A. Not at all.	D. Very much in line with me	B. a little bit in line with me.	C. Consistent with my moderate intensity	D. Very much in line with me	A. Not at all.	B. a little bit in line with me.	A. Not at all.	B. a little bit in line with me.	A. Not at all.	C. Consistent with my moderate intensity	B. a little bit in line with me.	A. Not at all.	D. Very much in line with me	Yes	No	Yes	Yes	No	Yes	No	No	Yes	No	Yes	Yes	Yes	Yes	No	Does not match	Does not match	Does not match	Extremely inconsistent	Extremely inconsistent	Not sure	Extremely inconsistent
196	2024/7/2 9:10:36	361 seconds	WeChat	N/A	116	Male	21-23	Undergraduate study	C. Moderate intensity and more intense and lasting exercise (such as cycling, running, playing table tennis, etc.)	B. 11 to 20 minutes	B. Three to five times a week	A. Walking, running B. Travel, outing C. Sports dance	E. Extremely in line with me	D. Very much in line with me	B. a little bit in line with me.	E. Extremely in line with me	E. Extremely in line with me	B. a little bit in line with me.	E. Extremely in line with me	E. Extremely in line with me	D. Very much in line with me	D. Very much in line with me	E. Extremely in line with me	D. Very much in line with me	C. Consistent with my moderate intensity	E. Extremely in line with me	C. Consistent with my moderate intensity	Yes	No	Yes	Yes	No	Yes	Yes	No	No	No	Yes	Yes	Yes	No	No	Conform	Not sure	Conform	Extremely in line	Conform	Not sure	Conform
197	2024/7/2 9:11:16	338 seconds	WeChat	N/A	119	Female	21-23	Undergraduate study	C. Moderate intensity and more intense and lasting exercise (such as cycling, running, playing table tennis, etc.)	A. Less than 10 minutes	E. 1-2 times per week	A. Walking, running B. Travel, outing D. Ball games	D. Very much in line with me	D. Very much in line with me	A. Not at all.	E. Extremely in line with me	D. Very much in line with me	C. Consistent with my moderate intensity	D. Very much in line with me	C. Consistent with my moderate intensity	D. Very much in line with me	E. Extremely in line with me	C. Consistent with my moderate intensity	D. Very much in line with me	E. Extremely in line with me	C. Consistent with my moderate intensity	C. Consistent with my moderate intensity	No	Yes	No	Yes	No	Yes	No	Yes	Yes	No	Yes	Yes	No	No	Yes	Extremely in line	Extremely in line	Extremely in line	Conform	Conform	Extremely in line	Conform
198	2024/7/2 9:11:56	272 seconds	WeChat	N/A	115	Female	18-20	I'm studying in a specialist	D. High-intensity but not sustained exercise with shortness of breath and a lot of sweating (such as playing badminton, basketball, tennis, football, etc.)	B. 11 to 20 minutes	D. Approximately once a day	B. Travel and outing C. Sports dance E. Skipping rope	C. Consistent with my moderate intensity	E. Extremely in line with me	B. a little bit in line with me.	D. Very much in line with me	D. Very much in line with me	B. a little bit in line with me.	C. Consistent with my moderate intensity	D. Very much in line with me	C. Consistent with my moderate intensity	E. Extremely in line with me	D. Very much in line with me	E. Extremely in line with me	D. Very much in line with me	E. Extremely in line with me	B. a little bit in line with me.	Yes	No	Yes	No	No	No	No	No	Yes	No	No	No	Yes	Yes	Yes	Conform	Conform	Extremely in line	Not sure	Conform	Extremely in line	Conform
199	2024/7/2 9:12:41	269 seconds	WeChat	N/A	126	Female	21-23	Undergraduate study	C. Moderate intensity and more intense and lasting exercise (such as cycling, running, playing table tennis, etc.)	C. 21 to 30 minutes	A. Less than once A month	B. Tourism and outing C. Sports dance	D. Very much in line with me	E. Extremely in line with me	A. Not at all.	E. Extremely in line with me	D. Very much in line with me	A. Not at all.	D. Very much in line with me	C. Consistent with my moderate intensity	D. Very much in line with me	E. Extremely in line with me	E. Extremely in line with me	E. Extremely in line with me	E. Extremely in line with me	E. Extremely in line with me	A. Not at all.	Yes	No	No	Yes	Yes	No	No	Yes	No	No	Yes	No	Yes	Yes	No	Conform	Extremely in line	Conform	Extremely in line	Extremely in line	Conform	Extremely in line
200	2024/7/2 9:13:09	260 seconds	WeChat	N/A	124	Female	18-20	I'm studying in a specialist	C. Moderate intensity and more intense and lasting exercise (such as cycling, running, playing table tennis, etc.)	C. 21 to 30 minutes	E. 1-2 times per week	B. Travel, outing C. Sports dance D. Ball games G. Fitness equipment activities	C. Consistent with my moderate intensity	D. Very much in line with me	B. a little bit in line with me.	D. Very much in line with me	E. Extremely in line with me	B. a little bit in line with me.	E. Extremely in line with me	E. Extremely in line with me	D. Very much in line with me	D. Very much in line with me	D. Very much in line with me	D. Very much in line with me	E. Extremely in line with me	E. Extremely in line with me	B. a little bit in line with me.	Yes	Yes	No	No	Yes	No	Yes	Yes	No	No	Yes	No	No	Yes	No	Conform	Conform	Extremely in line	Extremely in line	Extremely in line	Not sure	Extremely in line
201	2024/7/2 9:13:32	343 seconds	WeChat	N/A	120	Male	21-23	Undergraduate study	C. Moderate intensity and more intense and lasting exercise (such as cycling, running, playing table tennis, etc.)	A. Less than 10 minutes	C. 2 to 3 times a month	B. Travel and outing C. Sports dance E. Skipping rope	E. Extremely in line with me	D. Very much in line with me	A. Not at all.	D. Very much in line with me	E. Extremely in line with me	B. a little bit in line with me.	E. Extremely in line with me	D. Very much in line with me	E. Extremely in line with me	E. Extremely in line with me	E. Extremely in line with me	D. Very much in line with me	E. Extremely in line with me	E. Extremely in line with me	A. Not at all.	No	Yes	No	Yes	Yes	No	No	No	No	Yes	Yes	Yes	Yes	No	No	Conform	Conform	Conform	Not sure	Not sure	Extremely in line	Conform
202	2024/7/2 9:14:05	255 seconds	WeChat	N/A	121	Female	21-23	Undergraduate study	B. Low-intensity and low-tension sports (such as recreational volleyball, table tennis, jogging, Tai Chi, etc.)	E. More than 60 minutes	B. Three to five times a week	B. Travel and outing C. Sports dance E. Skipping rope	D. Very much in line with me	E. Extremely in line with me	A. Not at all.	E. Extremely in line with me	D. Very much in line with me	C. Consistent with my moderate intensity	D. Very much in line with me	D. Very much in line with me	E. Extremely in line with me	E. Extremely in line with me	C. Consistent with my moderate intensity	E. Extremely in line with me	D. Very much in line with me	D. Very much in line with me	B. a little bit in line with me.	Yes	No	Yes	Yes	Yes	Yes	No	No	No	No	No	Yes	No	No	Yes	Conform	Conform	Conform	Extremely in line	Extremely in line	Extremely in line	Extremely in line
203	2024/7/2 9:14:51	324 seconds	WeChat	N/A	61	Male	27-29	The doctor is studying	A. Light exercise (such as walking, doing radio gymnastics, playing gateball, etc.)	C. 21 to 30 minutes	E. 1-2 times per week	A. Walking, running B. Travel, outing C. Sports dance	A. Not at all.	B. a little bit in line with me.	D. Very much in line with me	A. Not at all.	A. Not at all.	E. Extremely in line with me	A. Not at all.	A. Not at all.	C. Consistent with my moderate intensity	B. a little bit in line with me.	B. a little bit in line with me.	B. a little bit in line with me.	B. a little bit in line with me.	B. a little bit in line with me.	D. Very much in line with me	No	Yes	No	No	Yes	No	Yes	Yes	No	No	Yes	Yes	No	Yes	No	Does not match	Does not match	Extremely inconsistent	Not sure	Does not match	Extremely inconsistent	Extremely inconsistent
204	2024/7/2 9:15:25	346 seconds	WeChat	N/A	57	Female	24-26	I'm studying for a master's degree	C. Moderate intensity and more intense and lasting exercise (such as cycling, running, playing table tennis, etc.)	D. 31 to 59 minutes	A. Less than once A month	C. Sports Dance D. Ball Games E. Skipping Rope	B. a little bit in line with me.	B. a little bit in line with me.	D. Very much in line with me	A. Not at all.	C. Consistent with my moderate intensity	D. Very much in line with me	B. a little bit in line with me.	B. a little bit in line with me.	B. a little bit in line with me.	A. Not at all.	A. Not at all.	B. a little bit in line with me.	A. Not at all.	A. Not at all.	D. Very much in line with me	No	Yes	No	No	Yes	No	Yes	No	Yes	Yes	Yes	Yes	No	No	No	Extremely inconsistent	Extremely inconsistent	Extremely inconsistent	Extremely inconsistent	Does not match	Extremely inconsistent	Extremely inconsistent
205	2024/7/2 9:16:13	343 seconds	WeChat	N/A	124	Female	18-20	Undergraduate study	A. Light exercise (such as walking, doing radio gymnastics, playing gateball, etc.)	C. 21 to 30 minutes	B. Three to five times a week	A. Walking, running B. Travel, outing D. Ball games	E. Extremely in line with me	C. Consistent with my moderate intensity	A. Not at all.	D. Very much in line with me	E. Extremely in line with me	B. a little bit in line with me.	D. Very much in line with me	E. Extremely in line with me	D. Very much in line with me	D. Very much in line with me	E. Extremely in line with me	E. Extremely in line with me	E. Extremely in line with me	E. Extremely in line with me	A. Not at all.	No	No	No	No	Yes	No	No	No	No	Yes	Yes	Yes	Yes	No	Yes	Extremely in line	Conform	Extremely in line	Not sure	Extremely in line	Extremely in line	Conform
206	2024/7/2 9:16:55	303 seconds	WeChat	N/A	58	Female	24-26	I'm studying for a master's degree	B. Low-intensity and low-tension sports (such as recreational volleyball, table tennis, jogging, Tai Chi, etc.)	C. 21 to 30 minutes	C. Two to three times a month	A. Walking and running B. Travel and outing	B. a little bit in line with me.	A. Not at all.	D. Very much in line with me	B. a little bit in line with me.	B. a little bit in line with me.	D. Very much in line with me	B. a little bit in line with me.	A. Not at all.	B. a little bit in line with me.	B. a little bit in line with me.	A. Not at all.	A. Not at all.	B. a little bit in line with me.	C. Consistent with my moderate intensity	E. Extremely in line with me	No	Yes	Yes	No	No	Yes	No	Yes	No	No	No	No	Yes	No	Yes	Does not match	Does not match	Extremely inconsistent	Extremely inconsistent	Does not match	Does not match	Does not match
207	2024/7/2 9:17:44	265 seconds	WeChat	N/A	118	Male	21-23	Undergraduate study	B. Low-intensity and low-tension sports (such as recreational volleyball, table tennis, jogging, Tai Chi, etc.)	D. 31 to 59 minutes	B. Three to five times a week	B. Tourism and outing D. Ball games	E. Extremely in line with me	C. Consistent with my moderate intensity	B. a little bit in line with me.	E. Extremely in line with me	E. Extremely in line with me	A. Not at all.	E. Extremely in line with me	E. Extremely in line with me	C. Consistent with my moderate intensity	E. Extremely in line with me	E. Extremely in line with me	C. Consistent with my moderate intensity	D. Very much in line with me	D. Very much in line with me	A. Not at all.	No	No	No	No	No	No	Yes	Yes	Yes	No	No	No	No	Yes	Yes	Conform	Conform	Extremely in line	Extremely in line	Extremely in line	Not sure	Conform
208	2024/7/2 9:18:30	334 seconds	WeChat	N/A	120	Male	18-20	Undergraduate study	D. High-intensity but not sustained exercise with shortness of breath and a lot of sweating (such as playing badminton, basketball, tennis, football, etc.)	C. 21 to 30 minutes	B. Three to five times a week	C. Sports Dance D. Ball Games E. Skipping Rope	C. Consistent with my moderate intensity	C. Consistent with my moderate intensity	B. a little bit in line with me.	E. Extremely in line with me	C. Consistent with my moderate intensity	B. a little bit in line with me.	D. Very much in line with me	E. Extremely in line with me	E. Extremely in line with me	D. Very much in line with me	E. Extremely in line with me	D. Very much in line with me	D. Very much in line with me	E. Extremely in line with me	A. Not at all.	Yes	Yes	No	Yes	Yes	Yes	No	Yes	Yes	Yes	Yes	Yes	Yes	No	No	Extremely in line	Conform	Not sure	Conform	Conform	Not sure	Conform
209	2024/7/2 9:19:04	366 seconds	WeChat	N/A	123	Male	18-20	I'm studying in a specialist	E. High-intensity and sustained exercise with shortness of breath and a lot of sweating (such as running, aerobics sets, swimming, etc.)	A. Less than 10 minutes	B. Three to five times a week	A. Walking and running B. Travel and outing F. Tai Chi and science of health preserving.	D. Very much in line with me	E. Extremely in line with me	C. Consistent with my moderate intensity	D. Very much in line with me	D. Very much in line with me	A. Not at all.	D. Very much in line with me	C. Consistent with my moderate intensity	E. Extremely in line with me	C. Consistent with my moderate intensity	E. Extremely in line with me	E. Extremely in line with me	D. Very much in line with me	C. Consistent with my moderate intensity	A. Not at all.	Yes	No	No	Yes	Yes	No	No	Yes	No	Yes	Yes	No	No	Yes	No	Extremely in line	Extremely in line	Conform	Conform	Extremely in line	Extremely in line	Extremely in line
210	2024/7/2 9:19:55	405 seconds	WeChat	N/A	115	Female	18-20	Undergraduate study	B. Low-intensity and low-tension sports (such as recreational volleyball, table tennis, jogging, Tai Chi, etc.)	A. Less than 10 minutes	C. Two to three times a month	A. Walking, running B. Travel, outing D. Ball games	E. Extremely in line with me	D. Very much in line with me	B. a little bit in line with me.	E. Extremely in line with me	D. Very much in line with me	B. a little bit in line with me.	D. Very much in line with me	E. Extremely in line with me	E. Extremely in line with me	D. Very much in line with me	D. Very much in line with me	D. Very much in line with me	C. Consistent with my moderate intensity	D. Very much in line with me	B. a little bit in line with me.	No	Yes	No	No	No	No	No	Yes	No	No	Yes	No	No	Yes	Yes	Conform	Extremely in line	Conform	Extremely in line	Extremely in line	Not sure	Conform
211	2024/7/2 9:20:21	354 seconds	WeChat	N/A	118	Female	21-23	Undergraduate study	A. Light exercise (such as walking, doing radio gymnastics, playing gateball, etc.)	A. Less than 10 minutes	A. Less than once A month	B. Tourism and outing C. Sports dance	D. Very much in line with me	E. Extremely in line with me	B. a little bit in line with me.	C. Consistent with my moderate intensity	E. Extremely in line with me	B. a little bit in line with me.	D. Very much in line with me	E. Extremely in line with me	E. Extremely in line with me	E. Extremely in line with me	E. Extremely in line with me	E. Extremely in line with me	E. Extremely in line with me	E. Extremely in line with me	B. a little bit in line with me.	No	Yes	Yes	No	No	No	No	Yes	Yes	Yes	No	Yes	Yes	Yes	Yes	Conform	Conform	Conform	Conform	Conform	Extremely in line	Not sure
212	2024/7/2 9:21:02	266 seconds	WeChat	N/A	126	Male	18-20	I'm studying in a specialist	A. Light exercise (such as walking, doing radio gymnastics, playing gateball, etc.)	D. 31 to 59 minutes	E. 1-2 times per week	A. Walking and running B. Travel and outing F. Tai Chi and science of health preserving.	C. Consistent with my moderate intensity	E. Extremely in line with me	A. Not at all.	D. Very much in line with me	E. Extremely in line with me	B. a little bit in line with me.	C. Consistent with my moderate intensity	E. Extremely in line with me	E. Extremely in line with me	E. Extremely in line with me	E. Extremely in line with me	D. Very much in line with me	D. Very much in line with me	C. Consistent with my moderate intensity	A. Not at all.	Yes	Yes	No	Yes	Yes	Yes	Yes	Yes	No	Yes	Yes	Yes	Yes	Yes	No	Conform	Conform	Conform	Conform	Extremely in line	Conform	Conform
213	2024/7/2 9:22:09	329 seconds	WeChat	N/A	65	Female	27-29	The doctor is studying	C. Moderate intensity and more intense and lasting exercise (such as cycling, running, playing table tennis, etc.)	B. 11 to 20 minutes	D. Approximately once a day	A. Walking and running B. Travel and outing	B. a little bit in line with me.	B. a little bit in line with me.	E. Extremely in line with me	C. Consistent with my moderate intensity	A. Not at all.	D. Very much in line with me	A. Not at all.	B. a little bit in line with me.	C. Consistent with my moderate intensity	A. Not at all.	A. Not at all.	B. a little bit in line with me.	A. Not at all.	B. a little bit in line with me.	E. Extremely in line with me	No	Yes	Yes	Yes	Yes	Yes	Yes	Yes	Yes	Yes	Yes	No	Yes	No	Yes	Extremely inconsistent	Does not match	Extremely inconsistent	Does not match	Does not match	Extremely inconsistent	Extremely inconsistent
214	2024/7/2 9:22:51	283 seconds	WeChat	N/A	130	Male	21-23	Undergraduate study	B. Low-intensity and low-tension sports (such as recreational volleyball, table tennis, jogging, Tai Chi, etc.)	C. 21 to 30 minutes	D. Approximately once a day	B. Travel and outing C. Sports dance E. Skipping rope	E. Extremely in line with me	E. Extremely in line with me	B. a little bit in line with me.	E. Extremely in line with me	E. Extremely in line with me	A. Not at all.	E. Extremely in line with me	E. Extremely in line with me	E. Extremely in line with me	D. Very much in line with me	E. Extremely in line with me	D. Very much in line with me	D. Very much in line with me	E. Extremely in line with me	B. a little bit in line with me.	Yes	Yes	Yes	No	Yes	Yes	No	Yes	No	No	Yes	No	Yes	No	No	Extremely in line	Conform	Extremely in line	Extremely in line	Extremely in line	Extremely in line	Not sure
215	2024/7/2 9:23:36	285 seconds	WeChat	N/A	118	Female	18-20	I'm studying in a specialist	C. Moderate intensity and more intense and lasting exercise (such as cycling, running, playing table tennis, etc.)	A. Less than 10 minutes	B. Three to five times a week	A. Walking, running B. Travel, outing C. Sports dance	E. Extremely in line with me	E. Extremely in line with me	C. Consistent with my moderate intensity	D. Very much in line with me	C. Consistent with my moderate intensity	B. a little bit in line with me.	E. Extremely in line with me	E. Extremely in line with me	D. Very much in line with me	D. Very much in line with me	D. Very much in line with me	C. Consistent with my moderate intensity	E. Extremely in line with me	D. Very much in line with me	C. Consistent with my moderate intensity	No	Yes	No	Yes	Yes	No	Yes	Yes	Yes	Yes	Yes	Yes	Yes	No	No	Conform	Extremely in line	Extremely in line	Conform	Conform	Conform	Conform
216	2024/7/2 9:24:03	341 seconds	WeChat	N/A	123	Female	21-23	I'm studying in a specialist	E. High-intensity and sustained exercise with shortness of breath and a lot of sweating (such as running, aerobics sets, swimming, etc.)	A. Less than 10 minutes	E. 1-2 times per week	C. Sports Dance D. Ball Games	D. Very much in line with me	E. Extremely in line with me	C. Consistent with my moderate intensity	D. Very much in line with me	D. Very much in line with me	B. a little bit in line with me.	D. Very much in line with me	E. Extremely in line with me	D. Very much in line with me	E. Extremely in line with me	E. Extremely in line with me	E. Extremely in line with me	E. Extremely in line with me	E. Extremely in line with me	B. a little bit in line with me.	Yes	Yes	No	No	No	No	No	Yes	No	Yes	Yes	No	Yes	Yes	No	Not sure	Conform	Conform	Conform	Extremely in line	Extremely in line	Extremely in line
217	2024/7/2 9:24:55	279 seconds	WeChat	N/A	69	Female	24-26	I'm studying for a master's degree	E. High-intensity and sustained exercise with shortness of breath and a lot of sweating (such as running, aerobics sets, swimming, etc.)	D. 31 to 59 minutes	B. Three to five times a week	C. Sports Dance D. Ball Games	A. Not at all.	B. a little bit in line with me.	E. Extremely in line with me	C. Consistent with my moderate intensity	B. a little bit in line with me.	E. Extremely in line with me	B. a little bit in line with me.	B. a little bit in line with me.	B. a little bit in line with me.	A. Not at all.	C. Consistent with my moderate intensity	B. a little bit in line with me.	C. Consistent with my moderate intensity	A. Not at all.	D. Very much in line with me	Yes	Yes	Yes	Yes	Yes	Yes	No	Yes	No	No	Yes	No	Yes	No	No	Extremely inconsistent	Not sure	Extremely inconsistent	Does not match	Does not match	Extremely inconsistent	Does not match
218	2024/7/2 9:25:24	278 seconds	WeChat	N/A	112	Male	18-20	Undergraduate study	A. Light exercise (such as walking, doing radio gymnastics, playing gateball, etc.)	B. 11 to 20 minutes	B. Three to five times a week	B. Travel and outing C. Sports dance E. Skipping rope	C. Consistent with my moderate intensity	D. Very much in line with me	B. a little bit in line with me.	E. Extremely in line with me	E. Extremely in line with me	B. a little bit in line with me.	E. Extremely in line with me	C. Consistent with my moderate intensity	E. Extremely in line with me	D. Very much in line with me	C. Consistent with my moderate intensity	D. Very much in line with me	D. Very much in line with me	E. Extremely in line with me	B. a little bit in line with me.	Yes	Yes	No	Yes	No	No	No	Yes	Yes	Yes	Yes	No	No	No	No	Not sure	Extremely in line	Conform	Conform	Extremely in line	Conform	Not sure
219	2024/7/2 9:25:49	307 seconds	WeChat	N/A	126	Female	18-20	Undergraduate study	E. High-intensity and sustained exercise with shortness of breath and a lot of sweating (such as running, aerobics sets, swimming, etc.)	D. 31 to 59 minutes	A. Less than once A month	D. Ball games E. Rope skipping	E. Extremely in line with me	D. Very much in line with me	B. a little bit in line with me.	D. Very much in line with me	D. Very much in line with me	A. Not at all.	E. Extremely in line with me	D. Very much in line with me	D. Very much in line with me	D. Very much in line with me	D. Very much in line with me	C. Consistent with my moderate intensity	E. Extremely in line with me	E. Extremely in line with me	B. a little bit in line with me.	Yes	Yes	No	Yes	No	Yes	No	Yes	No	No	No	Yes	No	No	Yes	Extremely in line	Extremely in line	Extremely in line	Not sure	Extremely in line	Extremely in line	Extremely in line
220	2024/7/2 12:58:08	160 seconds	Mobile submission	Direct access	102	Female	24-26	I'm studying for a master's degree	A. Light exercise (such as walking, doing radio gymnastics, playing gateball, etc.)	C. 21 to 30 minutes	E. 1-2 times per week	A. Walking, running B. Travel, outing C. Sports dance F. Tai Chi, science of health preserving H. Swimming	B. a little bit in line with me.	D. Very much in line with me	C. Consistent with my moderate intensity	C. Consistent with my moderate intensity	B. a little bit in line with me.	C. Consistent with my moderate intensity	B. a little bit in line with me.	E. Extremely in line with me	D. Very much in line with me	C. Consistent with my moderate intensity	B. a little bit in line with me.	C. Consistent with my moderate intensity	C. Consistent with my moderate intensity	C. Consistent with my moderate intensity	C. Consistent with my moderate intensity	Yes	Yes	No	No	Yes	Yes	Yes	Yes	Yes	Yes	Yes	Yes	Yes	Yes	Yes	Conform	Does not match	Conform	Not sure	Conform	Conform	Conform
221	2024/7/2 14:20:10	115 seconds	WeChat	N/A	83	Female	24-26	I'm studying for a master's degree	C. Moderate intensity and more intense and lasting exercise (such as cycling, running, playing table tennis, etc.)	D. 31 to 59 minutes	B. Three to five times a week	A. Walking, running B. Travel, outing C. Sports dance D. Ball games H. Swimming	A. Not at all.	A. Not at all.	D. Very much in line with me	A. Not at all.	A. Not at all.	D. Very much in line with me	A. Not at all.	B. a little bit in line with me.	B. a little bit in line with me.	D. Very much in line with me	A. Not at all.	A. Not at all.	A. Not at all.	B. a little bit in line with me.	D. Very much in line with me	Yes	Yes	No	Yes	Yes	Yes	Yes	Yes	Yes	Yes	Yes	Yes	No	No	Yes	Conform	Conform	Conform	Conform	Conform	Conform	Conform
222	2024/7/2 21:44:52	124 seconds	WeChat	N/A	131	Female	24-26	I'm studying for a master's degree	B. Low-intensity and low-tension sports (such as recreational volleyball, table tennis, jogging, Tai Chi, etc.)	C. 21 to 30 minutes	C. 2 to 3 times a month	A. Walking, running D. Ball games E. Skipping G. Fitness equipment activities H. Swimming	D. Very much in line with me	D. Very much in line with me	B. a little bit in line with me.	E. Extremely in line with me	D. Very much in line with me	B. a little bit in line with me.	D. Very much in line with me	E. Extremely in line with me	E. Extremely in line with me	C. Consistent with my moderate intensity	E. Extremely in line with me	D. Very much in line with me	E. Extremely in line with me	E. Extremely in line with me	B. a little bit in line with me.	Yes	Yes	No	Yes	Yes	Yes	Yes	Yes	Yes	Yes	Yes	Yes	Yes	Yes	Yes	Extremely in line	Conform	Not sure	Conform	Conform	Extremely in line	Extremely in line
223	2024/7/3 9:23:10	214 seconds	Mobile submission	Direct access	106	Female	18-20	Undergraduate study	B. Low-intensity and low-tension sports (such as recreational volleyball, table tennis, jogging, Tai Chi, etc.)	C. 21 to 30 minutes	C. 2 to 3 times a month	A. Walking and running B. Travel and outing	C. Consistent with my moderate intensity	D. Very much in line with me	B. a little bit in line with me.	D. Very much in line with me	C. Consistent with my moderate intensity	B. a little bit in line with me.	D. Very much in line with me	D. Very much in line with me	D. Very much in line with me	C. Consistent with my moderate intensity	C. Consistent with my moderate intensity	D. Very much in line with me	D. Very much in line with me	D. Very much in line with me	B. a little bit in line with me.	Yes	Yes	No	Yes	Yes	Yes	Yes	Yes	Yes	Yes	Yes	Yes	No	No	No	Conform	Does not match	Not sure	Not sure	Does not match	Not sure	Conform
224	2024/7/3 20:57:03	1158 seconds	Mobile submission	Direct access	104	Female	18-20	Undergraduate study	A. Light exercise (such as walking, doing radio gymnastics, playing gateball, etc.)	B. 11 to 20 minutes	A. Less than once A month	A. Walking and running B. Travel and outing E. Skipping rope F. Tai Chi and science of health preserving.	D. Very much in line with me	D. Very much in line with me	A. Not at all.	E. Extremely in line with me	D. Very much in line with me	D. Very much in line with me	B. a little bit in line with me.	E. Extremely in line with me	E. Extremely in line with me	A. Not at all.	B. a little bit in line with me.	D. Very much in line with me	D. Very much in line with me	D. Very much in line with me	A. Not at all.	No	No	Yes	No	No	No	No	No	No	No	No	No	No	No	Yes	Conform	Conform	Conform	Conform	Conform	Conform	Conform
225	2024/7/3 21:44:33	167 seconds	WeChat	N/A	107	Female	18-20	Undergraduate study	A. Light exercise (such as walking, doing radio gymnastics, playing gateball, etc.)	C. 21 to 30 minutes	C. Two to three times a month	A. Walking and running B. Travel and outing F. Tai Chi and science of health preserving.	C. Consistent with my moderate intensity	C. Consistent with my moderate intensity	A. Not at all.	E. Extremely in line with me	C. Consistent with my moderate intensity	C. Consistent with my moderate intensity	C. Consistent with my moderate intensity	E. Extremely in line with me	E. Extremely in line with me	A. Not at all.	D. Very much in line with me	C. Consistent with my moderate intensity	D. Very much in line with me	E. Extremely in line with me	A. Not at all.	Yes	Yes	No	No	Yes	No	No	Yes	Yes	No	Yes	Yes	No	No	No	Conform	Not sure	Does not match	Not sure	Not sure	Conform	Not sure
226	2024/7/4 18:17:40	256 seconds	WeChat	N/A	89	Female	18-20	Undergraduate study	B. Low-intensity and low-tension sports (such as recreational volleyball, table tennis, jogging, Tai Chi, etc.)	B. 11 to 20 minutes	E. 1-2 times per week	A. Walking, running B. Travel, outing C. Sports dance	B. a little bit in line with me.	B. a little bit in line with me.	B. a little bit in line with me.	A. Not at all.	B. a little bit in line with me.	C. Consistent with my moderate intensity	A. Not at all.	B. a little bit in line with me.	B. a little bit in line with me.	C. Consistent with my moderate intensity	B. a little bit in line with me.	B. a little bit in line with me.	A. Not at all.	A. Not at all.	B. a little bit in line with me.	Yes	Yes	No	No	Yes	Yes	No	Yes	Yes	Yes	Yes	Yes	No	No	Yes	Conform	Extremely in line	Conform	Not sure	Not sure	Conform	Conform
227	2024/7/4 18:17:58	188 seconds	WeChat	N/A	109	Female	21-23	Undergraduate study	A. Light exercise (such as walking, doing radio gymnastics, playing gateball, etc.)	C. 21 to 30 minutes	E. 1-2 times per week	A. Walking and running C. Sports dance	C. Consistent with my moderate intensity	D. Very much in line with me	A. Not at all.	E. Extremely in line with me	E. Extremely in line with me	A. Not at all.	D. Very much in line with me	E. Extremely in line with me	C. Consistent with my moderate intensity	A. Not at all.	E. Extremely in line with me	D. Very much in line with me	E. Extremely in line with me	D. Very much in line with me	A. Not at all.	Yes	Yes	No	No	No	No	No	No	No	Yes	Yes	No	Yes	Yes	Yes	Not sure	Not sure	Does not match	Not sure	Not sure	Not sure	Does not match
228	2024/7/4 22:42:04	211 seconds	Mobile submission	Direct access	69	Male	21-23	Undergraduate study	A. Light exercise (such as walking, doing radio gymnastics, playing gateball, etc.)	B. 11 to 20 minutes	C. Two to three times a month	A. Walking and running F. Tai Chi and science of health preserving.	A. Not at all.	B. a little bit in line with me.	B. a little bit in line with me.	B. a little bit in line with me.	B. a little bit in line with me.	B. a little bit in line with me.	A. Not at all.	B. a little bit in line with me.	B. a little bit in line with me.	B. a little bit in line with me.	A. Not at all.	A. Not at all.	A. Not at all.	B. a little bit in line with me.	B. a little bit in line with me.	No	No	No	No	No	No	No	No	No	No	Yes	Yes	No	No	No	Conform	Not sure	Does not match	Does not match	Does not match	Not sure	Not sure
229	2024/7/4 23:17:55	154 seconds	Mobile submission	Direct access	86	Male	24-26	Undergraduate study	C. Moderate intensity and more intense and lasting exercise (such as cycling, running, playing table tennis, etc.)	B. 11 to 20 minutes	C. 2 to 3 times a month	B. Travel and outing E. Rope skipping	B. a little bit in line with me.	D. Very much in line with me	C. Consistent with my moderate intensity	C. Consistent with my moderate intensity	C. Consistent with my moderate intensity	B. a little bit in line with me.	C. Consistent with my moderate intensity	C. Consistent with my moderate intensity	D. Very much in line with me	D. Very much in line with me	A. Not at all.	B. a little bit in line with me.	C. Consistent with my moderate intensity	D. Very much in line with me	B. a little bit in line with me.	Yes	No	No	Yes	No	Yes	No	No	No	Yes	No	No	No	Yes	No	Conform	Does not match	Does not match	Not sure	Does not match	Conform	Not sure
230	2024/7/5 10:11:47	204 seconds	WeChat	N/A	98	Female	21-23	Undergraduate study	C. Moderate intensity and more intense and lasting exercise (such as cycling, running, playing table tennis, etc.)	B. 11 to 20 minutes	A. Less than once A month	A. Walking, running B. Travel, outing D. Ball games	C. Consistent with my moderate intensity	C. Consistent with my moderate intensity	A. Not at all.	D. Very much in line with me	D. Very much in line with me	A. Not at all.	C. Consistent with my moderate intensity	D. Very much in line with me	E. Extremely in line with me	A. Not at all.	D. Very much in line with me	B. a little bit in line with me.	B. a little bit in line with me.	D. Very much in line with me	A. Not at all.	No	No	Yes	No	No	No	No	No	No	No	Yes	Yes	No	Yes	Yes	Not sure	Not sure	Extremely inconsistent	Does not match	Does not match	Conform	Conform
231	2024/7/5 10:18:09	154 seconds	WeChat	N/A	98	Female	21-23	Undergraduate study	A. Light exercise (such as walking, doing radio gymnastics, playing gateball, etc.)	A. Less than 10 minutes	A. Less than once A month	B. Tourism and outing D. Ball games	B. a little bit in line with me.	B. a little bit in line with me.	A. Not at all.	B. a little bit in line with me.	C. Consistent with my moderate intensity	A. Not at all.	B. a little bit in line with me.	C. Consistent with my moderate intensity	C. Consistent with my moderate intensity	B. a little bit in line with me.	B. a little bit in line with me.	D. Very much in line with me	D. Very much in line with me	C. Consistent with my moderate intensity	C. Consistent with my moderate intensity	Yes	Yes	No	Yes	Yes	Yes	Yes	Yes	Yes	Yes	Yes	Yes	No	No	Yes	Conform	Conform	Conform	Not sure	Conform	Conform	Not sure
232	2024/7/5 11:03:02	115 seconds	WeChat	N/A	85	Female	21-23	Undergraduate study	B. Low-intensity and low-tension sports (such as recreational volleyball, table tennis, jogging, Tai Chi, etc.)	C. 21 to 30 minutes	C. Two to three times a month	A. Walking and running	B. a little bit in line with me.	B. a little bit in line with me.	B. a little bit in line with me.	B. a little bit in line with me.	B. a little bit in line with me.	B. a little bit in line with me.	B. a little bit in line with me.	B. a little bit in line with me.	B. a little bit in line with me.	B. a little bit in line with me.	B. a little bit in line with me.	B. a little bit in line with me.	B. a little bit in line with me.	B. a little bit in line with me.	B. a little bit in line with me.	Yes	Yes	Yes	Yes	Yes	No	No	No	No	Yes	Yes	Yes	Yes	Yes	Yes	Conform	Does not match	Does not match	Conform	Does not match	Conform	Conform
233	2024/7/5 11:38:28	185 seconds	WeChat	N/A	95	Female	21-23	Undergraduate study	B. Low-intensity and low-tension sports (such as recreational volleyball, table tennis, jogging, Tai Chi, etc.)	C. 21 to 30 minutes	C. Two to three times a month	A. Walking and running D. Ball games	B. a little bit in line with me.	C. Consistent with my moderate intensity	C. Consistent with my moderate intensity	D. Very much in line with me	D. Very much in line with me	C. Consistent with my moderate intensity	D. Very much in line with me	C. Consistent with my moderate intensity	C. Consistent with my moderate intensity	D. Very much in line with me	D. Very much in line with me	E. Extremely in line with me	D. Very much in line with me	C. Consistent with my moderate intensity	D. Very much in line with me	Yes	No	No	Yes	Yes	No	No	No	No	No	Yes	Yes	No	No	No	Not sure	Does not match	Conform	Conform	Conform	Not sure	Not sure
234	2024/7/5 11:52:55	174 seconds	WeChat	N/A	85	Female	24-26	I'm studying for a master's degree	A. Light exercise (such as walking, doing radio gymnastics, playing gateball, etc.)	C. 21 to 30 minutes	A. Less than once A month	A. Walking and running D. Ball games H. Swimming	A. Not at all.	B. a little bit in line with me.	B. a little bit in line with me.	B. a little bit in line with me.	A. Not at all.	A. Not at all.	A. Not at all.	B. a little bit in line with me.	D. Very much in line with me	D. Very much in line with me	A. Not at all.	B. a little bit in line with me.	B. a little bit in line with me.	B. a little bit in line with me.	B. a little bit in line with me.	Yes	Yes	No	Yes	Yes	Yes	Yes	Yes	Yes	No	Yes	Yes	No	No	No	Conform	Conform	Conform	Not sure	Not sure	Conform	Not sure
235	2024/7/5 16:06:10	209 seconds	WeChat	N/A	100	Female	24-26	I'm studying for a master's degree	D. High-intensity but not sustained exercise with shortness of breath and a lot of sweating (such as playing badminton, basketball, tennis, football, etc.)	D. 31 to 59 minutes	C. Two to three times a month	A. Walking, running B. Travel, outing D. Ball games	A. Not at all.	B. a little bit in line with me.	C. Consistent with my moderate intensity	D. Very much in line with me	D. Very much in line with me	D. Very much in line with me	A. Not at all.	C. Consistent with my moderate intensity	D. Very much in line with me	D. Very much in line with me	D. Very much in line with me	C. Consistent with my moderate intensity	C. Consistent with my moderate intensity	D. Very much in line with me	D. Very much in line with me	Yes	Yes	No	Yes	Yes	Yes	Yes	Yes	Yes	Yes	Yes	Yes	No	Yes	No	Conform	Conform	Does not match	Not sure	Not sure	Conform	Conform
236	2024/7/5 16:08:55	153 seconds	WeChat	N/A	103	Female	18-20	I'm studying in a specialist	A. Light exercise (such as walking, doing radio gymnastics, playing gateball, etc.)	D. 31 to 59 minutes	E. 1-2 times per week	A. Walking and running D. Ball games	B. a little bit in line with me.	C. Consistent with my moderate intensity	B. a little bit in line with me.	B. a little bit in line with me.	B. a little bit in line with me.	B. a little bit in line with me.	B. a little bit in line with me.	B. a little bit in line with me.	B. a little bit in line with me.	A. Not at all.	C. Consistent with my moderate intensity	B. a little bit in line with me.	B. a little bit in line with me.	C. Consistent with my moderate intensity	A. Not at all.	Yes	Yes	Yes	Yes	Yes	Yes	Yes	Yes	Yes	Yes	Yes	Yes	No	No	No	Conform	Conform	Conform	Conform	Conform	Conform	Conform
237	2024/7/5 18:04:41	230 seconds	WeChat	N/A	105	Female	21-23	Undergraduate study	B. Low-intensity and low-tension sports (such as recreational volleyball, table tennis, jogging, Tai Chi, etc.)	C. 21 to 30 minutes	B. Three to five times a week	A. Walking, running B. Travel, outing G. Fitness equipment activities H. Swimming	C. Consistent with my moderate intensity	D. Very much in line with me	B. a little bit in line with me.	D. Very much in line with me	C. Consistent with my moderate intensity	A. Not at all.	C. Consistent with my moderate intensity	C. Consistent with my moderate intensity	C. Consistent with my moderate intensity	A. Not at all.	D. Very much in line with me	C. Consistent with my moderate intensity	B. a little bit in line with me.	B. a little bit in line with me.	A. Not at all.	Yes	Yes	No	Yes	Yes	Yes	Yes	Yes	Yes	No	Yes	Yes	No	Yes	No	Conform	Conform	Does not match	Not sure	Not sure	Conform	Conform
238	2024/7/5 20:54:02	447 seconds	WeChat	N/A	66	Male	18-20	Undergraduate study	A. Light exercise (such as walking, doing radio gymnastics, playing gateball, etc.)	E. More than 60 minutes	B. Three to five times a week	A. Walking and running B. Travel and outing	B. a little bit in line with me.	A. Not at all.	E. Extremely in line with me	A. Not at all.	A. Not at all.	B. a little bit in line with me.	A. Not at all.	C. Consistent with my moderate intensity	B. a little bit in line with me.	D. Very much in line with me	C. Consistent with my moderate intensity	A. Not at all.	A. Not at all.	A. Not at all.	C. Consistent with my moderate intensity	Yes	Yes	Yes	Yes	No	Yes	Yes	No	Yes	Yes	No	No	Yes	No	Yes	Does not match	Does not match	Not sure	Does not match	Does not match	Extremely inconsistent	Extremely inconsistent
239	2024/7/5 20:54:11	491 seconds	WeChat	N/A	77	Female	18-20	I'm studying in a specialist	C. Moderate intensity and more intense and lasting exercise (such as cycling, running, playing table tennis, etc.)	C. 21 to 30 minutes	D. Approximately once a day	A. Walking and running E. Skipping G. Exercise equipment activities	E. Extremely in line with me	A. Not at all.	D. Very much in line with me	C. Consistent with my moderate intensity	A. Not at all.	D. Very much in line with me	A. Not at all.	E. Extremely in line with me	B. a little bit in line with me.	C. Consistent with my moderate intensity	A. Not at all.	A. Not at all.	E. Extremely in line with me	A. Not at all.	C. Consistent with my moderate intensity	Yes	Yes	No	No	Yes	No	No	Yes	Yes	No	Yes	Yes	Yes	Yes	Yes	Not sure	Does not match	Extremely inconsistent	Not sure	Conform	Not sure	Extremely inconsistent
240	2024/7/5 20:54:28	547 seconds	WeChat	N/A	81	Male	18-20	I'm studying in a specialist	B. Low-intensity and low-tension sports (such as recreational volleyball, table tennis, jogging, Tai Chi, etc.)	B. 11 to 20 minutes	D. Approximately once a day	D. Ball games G. Exercise equipment activities	B. a little bit in line with me.	E. Extremely in line with me	C. Consistent with my moderate intensity	C. Consistent with my moderate intensity	B. a little bit in line with me.	D. Very much in line with me	B. a little bit in line with me.	B. a little bit in line with me.	A. Not at all.	E. Extremely in line with me	C. Consistent with my moderate intensity	A. Not at all.	C. Consistent with my moderate intensity	B. a little bit in line with me.	B. a little bit in line with me.	Yes	Yes	Yes	No	No	Yes	Yes	Yes	Yes	Yes	No	Yes	No	Yes	No	Does not match	Extremely inconsistent	Extremely inconsistent	Extremely in line	Extremely in line	Does not match	Extremely in line
241	2024/7/5 20:54:33	545 seconds	WeChat	N/A	72	Male	18-20	I'm studying in a specialist	B. Low-intensity and low-tension sports (such as recreational volleyball, table tennis, jogging, Tai Chi, etc.)	D. 31 to 59 minutes	A. Less than once A month	A. Walking, running B. Travel, outing D. Ball games	A. Not at all.	A. Not at all.	E. Extremely in line with me	C. Consistent with my moderate intensity	A. Not at all.	C. Consistent with my moderate intensity	A. Not at all.	B. a little bit in line with me.	A. Not at all.	D. Very much in line with me	B. a little bit in line with me.	D. Very much in line with me	C. Consistent with my moderate intensity	D. Very much in line with me	E. Extremely in line with me	No	Yes	Yes	Yes	No	No	No	Yes	Yes	Yes	Yes	No	No	Yes	Yes	Not sure	Does not match	Does not match	Does not match	Extremely inconsistent	Extremely in line	Not sure
242	2024/7/5 20:54:43	513 seconds	WeChat	N/A	83	Male	21-23	Undergraduate study	A. Light exercise (such as walking, doing radio gymnastics, playing gateball, etc.)	E. More than 60 minutes	B. Three to five times a week	A. Walking and running B. Travel and outing E. Skipping rope	D. Very much in line with me	B. a little bit in line with me.	C. Consistent with my moderate intensity	C. Consistent with my moderate intensity	A. Not at all.	B. a little bit in line with me.	A. Not at all.	B. a little bit in line with me.	E. Extremely in line with me	C. Consistent with my moderate intensity	C. Consistent with my moderate intensity	A. Not at all.	C. Consistent with my moderate intensity	A. Not at all.	C. Consistent with my moderate intensity	Yes	Yes	Yes	No	No	Yes	Yes	Yes	Yes	Yes	No	Yes	No	Yes	Yes	Extremely inconsistent	Does not match	Extremely in line	Extremely in line	Does not match	Extremely inconsistent	Does not match
243	2024/7/5 20:54:51	506 seconds	WeChat	N/A	72	Male	18-20	Undergraduate study	E. High-intensity and sustained exercise with shortness of breath and a lot of sweating (such as running, aerobics sets, swimming, etc.)	B. 11 to 20 minutes	A. Less than once A month	A. Walking and running B. Travel and outing E. Skipping rope	A. Not at all.	B. a little bit in line with me.	C. Consistent with my moderate intensity	B. a little bit in line with me.	A. Not at all.	C. Consistent with my moderate intensity	A. Not at all.	E. Extremely in line with me	C. Consistent with my moderate intensity	D. Very much in line with me	C. Consistent with my moderate intensity	B. a little bit in line with me.	C. Consistent with my moderate intensity	A. Not at all.	E. Extremely in line with me	No	No	No	No	No	No	Yes	Yes	Yes	No	Yes	Yes	Yes	Yes	Yes	Extremely in line	Extremely inconsistent	Not sure	Does not match	Not sure	Not sure	Extremely inconsistent
244	2024/7/5 20:55:16	422 seconds	WeChat	N/A	68	Female	21-23	I'm studying in a specialist	E. High-intensity and sustained exercise with shortness of breath and a lot of sweating (such as running, aerobics sets, swimming, etc.)	B. 11 to 20 minutes	B. Three to five times a week	B. Travel, outing D. Ball games G. Fitness equipment activities	A. Not at all.	A. Not at all.	E. Extremely in line with me	C. Consistent with my moderate intensity	C. Consistent with my moderate intensity	E. Extremely in line with me	C. Consistent with my moderate intensity	A. Not at all.	C. Consistent with my moderate intensity	C. Consistent with my moderate intensity	A. Not at all.	B. a little bit in line with me.	E. Extremely in line with me	E. Extremely in line with me	D. Very much in line with me	Yes	No	No	No	Yes	No	Yes	Yes	No	Yes	Yes	Yes	Yes	Yes	No	Extremely inconsistent	Extremely inconsistent	Extremely inconsistent	Extremely inconsistent	Extremely inconsistent	Extremely in line	Extremely inconsistent
245	2024/7/5 20:55:17	477 seconds	WeChat	N/A	63	Male	24-26	I'm studying for a master's degree	B. Low-intensity and low-tension sports (such as recreational volleyball, table tennis, jogging, Tai Chi, etc.)	A. Less than 10 minutes	D. Approximately once a day	B. Travel and outing E. Rope skipping	A. Not at all.	B. a little bit in line with me.	E. Extremely in line with me	B. a little bit in line with me.	A. Not at all.	E. Extremely in line with me	B. a little bit in line with me.	A. Not at all.	C. Consistent with my moderate intensity	E. Extremely in line with me	A. Not at all.	A. Not at all.	B. a little bit in line with me.	E. Extremely in line with me	E. Extremely in line with me	Yes	Yes	Yes	No	No	No	Yes	Yes	Yes	Yes	Yes	No	No	No	Yes	Extremely in line	Extremely inconsistent	Not sure	Does not match	Not sure	Extremely inconsistent	Does not match
246	2024/7/5 20:55:25	496 seconds	WeChat	N/A	78	Female	21-23	I'm studying in a specialist	A. Light exercise (such as walking, doing radio gymnastics, playing gateball, etc.)	C. 21 to 30 minutes	E. 1-2 times per week	A. Walking and running B. Travel and outing	D. Very much in line with me	B. a little bit in line with me.	D. Very much in line with me	B. a little bit in line with me.	A. Not at all.	A. Not at all.	B. a little bit in line with me.	A. Not at all.	C. Consistent with my moderate intensity	C. Consistent with my moderate intensity	C. Consistent with my moderate intensity	A. Not at all.	C. Consistent with my moderate intensity	C. Consistent with my moderate intensity	E. Extremely in line with me	Yes	Yes	Yes	No	No	Yes	Yes	Yes	Yes	No	Yes	Yes	Yes	No	Yes	Extremely in line	Extremely inconsistent	Not sure	Not sure	Conform	Extremely inconsistent	Extremely inconsistent
247	2024/7/5 20:55:37	514 seconds	WeChat	N/A	63	Female	21-23	Undergraduate study	D. High-intensity but not sustained exercise with shortness of breath and a lot of sweating (such as playing badminton, basketball, tennis, football, etc.)	A. Less than 10 minutes	D. Approximately once a day	A. Walking and running E. Skipping rope F. Tai Chi and science of health preserving.	A. Not at all.	A. Not at all.	E. Extremely in line with me	A. Not at all.	C. Consistent with my moderate intensity	D. Very much in line with me	A. Not at all.	A. Not at all.	C. Consistent with my moderate intensity	D. Very much in line with me	B. a little bit in line with me.	B. a little bit in line with me.	C. Consistent with my moderate intensity	B. a little bit in line with me.	E. Extremely in line with me	Yes	Yes	Yes	No	Yes	Yes	No	Yes	Yes	No	Yes	Yes	Yes	Yes	Yes	Extremely inconsistent	Extremely inconsistent	Extremely inconsistent	Not sure	Extremely inconsistent	Not sure	Does not match
248	2024/7/5 20:56:13	446 seconds	WeChat	N/A	68	Female	30-32	I'm studying for a master's degree	B. Low-intensity and low-tension sports (such as recreational volleyball, table tennis, jogging, Tai Chi, etc.)	D. 31 to 59 minutes	B. Three to five times a week	A. Walking and running D. Ball games E. Skipping rope	A. Not at all.	E. Extremely in line with me	D. Very much in line with me	A. Not at all.	A. Not at all.	E. Extremely in line with me	A. Not at all.	A. Not at all.	C. Consistent with my moderate intensity	D. Very much in line with me	B. a little bit in line with me.	C. Consistent with my moderate intensity	C. Consistent with my moderate intensity	A. Not at all.	E. Extremely in line with me	No	Yes	Yes	No	No	Yes	Yes	Yes	Yes	Yes	No	No	Yes	Yes	No	Does not match	Does not match	Not sure	Extremely inconsistent	Extremely inconsistent	Does not match	Does not match
249	2024/7/5 20:56:26	462 seconds	WeChat	N/A	73	Male	21-23	Undergraduate study	E. High-intensity and sustained exercise with shortness of breath and a lot of sweating (such as running, aerobics sets, swimming, etc.)	C. 21 to 30 minutes	A. Less than once A month	A. Walking and running B. Travel and outing E. Skipping rope	A. Not at all.	B. a little bit in line with me.	E. Extremely in line with me	B. a little bit in line with me.	C. Consistent with my moderate intensity	D. Very much in line with me	C. Consistent with my moderate intensity	A. Not at all.	A. Not at all.	E. Extremely in line with me	D. Very much in line with me	A. Not at all.	B. a little bit in line with me.	B. a little bit in line with me.	C. Consistent with my moderate intensity	Yes	Yes	Yes	No	Yes	Yes	Yes	Yes	Yes	No	Yes	No	Yes	Yes	Yes	Does not match	Extremely inconsistent	Does not match	Not sure	Conform	Extremely inconsistent	Not sure
250	2024/7/5 20:56:32	419 seconds	WeChat	N/A	75	Female	30-32	I'm studying for a master's degree	A. Light exercise (such as walking, doing radio gymnastics, playing gateball, etc.)	B. 11 to 20 minutes	B. Three to five times a week	A. Walking and running B. Travel and outing	A. Not at all.	A. Not at all.	C. Consistent with my moderate intensity	E. Extremely in line with me	E. Extremely in line with me	D. Very much in line with me	C. Consistent with my moderate intensity	A. Not at all.	B. a little bit in line with me.	E. Extremely in line with me	D. Very much in line with me	A. Not at all.	C. Consistent with my moderate intensity	D. Very much in line with me	E. Extremely in line with me	Yes	No	No	No	Yes	Yes	Yes	Yes	Yes	Yes	No	No	Yes	Yes	Yes	Does not match	Extremely in line	Extremely inconsistent	Extremely inconsistent	Extremely in line	Does not match	Extremely inconsistent
251	2024/7/5 20:56:38	438 seconds	WeChat	N/A	76	Male	18-20	I'm studying in a specialist	C. Moderate intensity and more intense and lasting exercise (such as cycling, running, playing table tennis, etc.)	B. 11 to 20 minutes	C. Two to three times a month	C. Dance Sport E. Rope Skipping	A. Not at all.	A. Not at all.	D. Very much in line with me	A. Not at all.	B. a little bit in line with me.	B. a little bit in line with me.	C. Consistent with my moderate intensity	B. a little bit in line with me.	A. Not at all.	E. Extremely in line with me	A. Not at all.	B. a little bit in line with me.	E. Extremely in line with me	E. Extremely in line with me	E. Extremely in line with me	Yes	No	Yes	No	Yes	Yes	Yes	Yes	Yes	Yes	Yes	No	Yes	No	No	Not sure	Not sure	Not sure	Does not match	Not sure	Extremely inconsistent	Does not match
252	2024/7/5 20:56:49	526 seconds	WeChat	N/A	75	Male	24-26	I'm studying for a master's degree	C. Moderate intensity and more intense and lasting exercise (such as cycling, running, playing table tennis, etc.)	A. Less than 10 minutes	C. Two to three times a month	F. Tai Chi, science of health preserving G. Exercise equipment activities	C. Consistent with my moderate intensity	B. a little bit in line with me.	D. Very much in line with me	E. Extremely in line with me	A. Not at all.	D. Very much in line with me	D. Very much in line with me	A. Not at all.	D. Very much in line with me	C. Consistent with my moderate intensity	B. a little bit in line with me.	C. Consistent with my moderate intensity	B. a little bit in line with me.	C. Consistent with my moderate intensity	E. Extremely in line with me	No	Yes	No	No	No	No	Yes	No	Yes	Yes	Yes	Yes	No	Yes	Yes	Does not match	Extremely inconsistent	Extremely inconsistent	Extremely inconsistent	Does not match	Does not match	Conform
253	2024/7/5 20:56:57	522 seconds	WeChat	N/A	69	Male	24-26	I'm studying for a master's degree	E. High-intensity and sustained exercise with shortness of breath and a lot of sweating (such as running, aerobics sets, swimming, etc.)	A. Less than 10 minutes	C. Two to three times a month	A. Walking and running B. Travel and outing	A. Not at all.	C. Consistent with my moderate intensity	E. Extremely in line with me	A. Not at all.	C. Consistent with my moderate intensity	E. Extremely in line with me	E. Extremely in line with me	B. a little bit in line with me.	A. Not at all.	C. Consistent with my moderate intensity	A. Not at all.	A. Not at all.	B. a little bit in line with me.	B. a little bit in line with me.	B. a little bit in line with me.	No	Yes	Yes	No	Yes	Yes	Yes	No	Yes	Yes	Yes	No	Yes	No	No	Does not match	Does not match	Not sure	Not sure	Extremely inconsistent	Does not match	Extremely inconsistent
254	2024/7/5 20:57:02	477 seconds	WeChat	N/A	70	Female	27-29	I'm studying for a master's degree	D. High-intensity but not sustained exercise with shortness of breath and a lot of sweating (such as playing badminton, basketball, tennis, football, etc.)	A. Less than 10 minutes	D. Approximately once a day	A. Walking and running C. Sports dance G. Fitness equipment activities	C. Consistent with my moderate intensity	A. Not at all.	E. Extremely in line with me	B. a little bit in line with me.	C. Consistent with my moderate intensity	E. Extremely in line with me	A. Not at all.	B. a little bit in line with me.	C. Consistent with my moderate intensity	D. Very much in line with me	D. Very much in line with me	B. a little bit in line with me.	A. Not at all.	A. Not at all.	E. Extremely in line with me	Yes	Yes	Yes	Yes	Yes	Yes	Yes	No	Yes	Yes	No	Yes	Yes	Yes	Yes	Extremely in line	Does not match	Does not match	Does not match	Does not match	Extremely inconsistent	Does not match
255	2024/7/5 20:57:06	531 seconds	WeChat	N/A	79	Female	18-20	Undergraduate study	C. Moderate intensity and more intense and lasting exercise (such as cycling, running, playing table tennis, etc.)	C. 21 to 30 minutes	A. Less than once A month	B. Travel, outing C. Sports dance G. Fitness equipment activities	B. a little bit in line with me.	B. a little bit in line with me.	D. Very much in line with me	B. a little bit in line with me.	B. a little bit in line with me.	E. Extremely in line with me	A. Not at all.	C. Consistent with my moderate intensity	E. Extremely in line with me	C. Consistent with my moderate intensity	C. Consistent with my moderate intensity	C. Consistent with my moderate intensity	B. a little bit in line with me.	A. Not at all.	C. Consistent with my moderate intensity	Yes	No	No	Yes	Yes	Yes	No	Yes	Yes	Yes	No	Yes	Yes	Yes	Yes	Does not match	Extremely in line	Extremely inconsistent	Extremely in line	Does not match	Not sure	Not sure
256	2024/7/5 20:57:10	553 seconds	WeChat	N/A	93	Female	27-29	I'm studying for a master's degree	C. Moderate intensity and more intense and lasting exercise (such as cycling, running, playing table tennis, etc.)	B. 11 to 20 minutes	C. Two to three times a month	A. Walking and running D. Ball games E. Skipping rope	C. Consistent with my moderate intensity	C. Consistent with my moderate intensity	D. Very much in line with me	E. Extremely in line with me	B. a little bit in line with me.	D. Very much in line with me	D. Very much in line with me	A. Not at all.	D. Very much in line with me	D. Very much in line with me	B. a little bit in line with me.	B. a little bit in line with me.	C. Consistent with my moderate intensity	D. Very much in line with me	A. Not at all.	Yes	Yes	Yes	Yes	Yes	Yes	Yes	Yes	Yes	Yes	Yes	Yes	No	Yes	Yes	Extremely inconsistent	Extremely inconsistent	Conform	Does not match	Conform	Conform	Extremely inconsistent
257	2024/7/5 20:57:17	389 seconds	WeChat	N/A	70	Female	27-29	I'm studying for a master's degree	B. Low-intensity and low-tension sports (such as recreational volleyball, table tennis, jogging, Tai Chi, etc.)	B. 11 to 20 minutes	C. 2 to 3 times a month	A. Walking and running D. Ball games H. Swimming	B. a little bit in line with me.	A. Not at all.	E. Extremely in line with me	A. Not at all.	A. Not at all.	E. Extremely in line with me	D. Very much in line with me	B. a little bit in line with me.	A. Not at all.	E. Extremely in line with me	D. Very much in line with me	C. Consistent with my moderate intensity	E. Extremely in line with me	A. Not at all.	C. Consistent with my moderate intensity	Yes	Yes	No	No	No	Yes	No	Yes	Yes	Yes	Yes	No	Yes	Yes	Yes	Does not match	Not sure	Not sure	Extremely inconsistent	Does not match	Not sure	Extremely inconsistent
258	2024/7/5 20:57:18	537 seconds	WeChat	N/A	59	Male	18-20	I'm studying in a specialist	D. High-intensity but not sustained exercise with shortness of breath and a lot of sweating (such as playing badminton, basketball, tennis, football, etc.)	B. 11 to 20 minutes	E. 1-2 times per week	A. Walking, running F. Tai Chi, science of health preserving H. Swimming	A. Not at all.	B. a little bit in line with me.	E. Extremely in line with me	A. Not at all.	A. Not at all.	D. Very much in line with me	A. Not at all.	C. Consistent with my moderate intensity	B. a little bit in line with me.	C. Consistent with my moderate intensity	B. a little bit in line with me.	B. a little bit in line with me.	A. Not at all.	A. Not at all.	E. Extremely in line with me	No	Yes	Yes	No	No	Yes	Yes	No	Yes	Yes	No	No	No	No	No	Does not match	Extremely inconsistent	Extremely inconsistent	Extremely inconsistent	Extremely inconsistent	Conform	Extremely inconsistent
259	2024/7/5 20:57:24	475 seconds	WeChat	N/A	77	Female	18-20	Undergraduate study	A. Light exercise (such as walking, doing radio gymnastics, playing gateball, etc.)	C. 21 to 30 minutes	B. Three to five times a week	B. Travel and outing E. Rope skipping	A. Not at all.	E. Extremely in line with me	E. Extremely in line with me	C. Consistent with my moderate intensity	B. a little bit in line with me.	C. Consistent with my moderate intensity	A. Not at all.	B. a little bit in line with me.	E. Extremely in line with me	D. Very much in line with me	B. a little bit in line with me.	B. a little bit in line with me.	A. Not at all.	D. Very much in line with me	D. Very much in line with me	Yes	Yes	Yes	No	Yes	Yes	Yes	Yes	Yes	Yes	No	Yes	Yes	Yes	Yes	Does not match	Extremely inconsistent	Does not match	Does not match	Extremely inconsistent	Not sure	Not sure
260	2024/7/5 20:57:31	501 seconds	WeChat	N/A	72	Male	18-20	Undergraduate study	B. Low-intensity and low-tension sports (such as recreational volleyball, table tennis, jogging, Tai Chi, etc.)	A. Less than 10 minutes	C. Two to three times a month	A. Walking and running B. Travel and outing E. Skipping rope	A. Not at all.	B. a little bit in line with me.	C. Consistent with my moderate intensity	E. Extremely in line with me	A. Not at all.	D. Very much in line with me	B. a little bit in line with me.	B. a little bit in line with me.	A. Not at all.	C. Consistent with my moderate intensity	A. Not at all.	C. Consistent with my moderate intensity	E. Extremely in line with me	B. a little bit in line with me.	E. Extremely in line with me	Yes	Yes	No	No	Yes	Yes	Yes	No	No	Yes	Yes	Yes	Yes	Yes	Yes	Not sure	Not sure	Extremely inconsistent	Not sure	Not sure	Extremely inconsistent	Extremely inconsistent
261	2024/7/5 20:57:34	503 seconds	WeChat	N/A	127	Female	24-26	I'm studying for a master's degree	B. Low-intensity and low-tension sports (such as recreational volleyball, table tennis, jogging, Tai Chi, etc.)	C. 21 to 30 minutes	A. Less than once A month	D. Ball games E. Skipping rope H. Swimming	D. Very much in line with me	E. Extremely in line with me	A. Not at all.	E. Extremely in line with me	E. Extremely in line with me	B. a little bit in line with me.	C. Consistent with my moderate intensity	D. Very much in line with me	D. Very much in line with me	C. Consistent with my moderate intensity	D. Very much in line with me	E. Extremely in line with me	D. Very much in line with me	E. Extremely in line with me	A. Not at all.	Yes	No	Yes	Yes	Yes	Yes	No	Yes	Yes	Yes	Yes	Yes	Yes	No	No	Extremely in line	Extremely in line	Extremely in line	Conform	Extremely in line	Conform	Conform
262	2024/7/5 20:57:39	482 seconds	WeChat	N/A	79	Male	18-20	I'm studying in a specialist	D. High-intensity but not sustained exercise with shortness of breath and a lot of sweating (such as playing badminton, basketball, tennis, football, etc.)	D. 31 to 59 minutes	B. Three to five times a week	A. Walking and running D. Ball games	B. a little bit in line with me.	C. Consistent with my moderate intensity	A. Not at all.	C. Consistent with my moderate intensity	B. a little bit in line with me.	E. Extremely in line with me	C. Consistent with my moderate intensity	C. Consistent with my moderate intensity	C. Consistent with my moderate intensity	E. Extremely in line with me	C. Consistent with my moderate intensity	B. a little bit in line with me.	C. Consistent with my moderate intensity	C. Consistent with my moderate intensity	D. Very much in line with me	No	No	No	No	Yes	No	Yes	Yes	Yes	Yes	No	Yes	No	Yes	No	Extremely inconsistent	Extremely in line	Not sure	Extremely inconsistent	Extremely inconsistent	Not sure	Not sure
263	2024/7/5 20:57:39	426 seconds	WeChat	N/A	132	Female	24-26	I'm studying for a master's degree	D. High-intensity but not sustained exercise with shortness of breath and a lot of sweating (such as playing badminton, basketball, tennis, football, etc.)	D. 31 to 59 minutes	C. Two to three times a month	C. Sports Dance G. Exercise Machine Activities	E. Extremely in line with me	E. Extremely in line with me	B. a little bit in line with me.	E. Extremely in line with me	E. Extremely in line with me	A. Not at all.	C. Consistent with my moderate intensity	D. Very much in line with me	D. Very much in line with me	A. Not at all.	E. Extremely in line with me	C. Consistent with my moderate intensity	E. Extremely in line with me	D. Very much in line with me	B. a little bit in line with me.	No	Yes	Yes	Yes	No	No	Yes	Yes	Yes	Yes	No	Yes	Yes	Yes	No	Extremely in line	Extremely in line	Conform	Conform	Conform	Conform	Extremely in line
264	2024/7/5 20:57:45	408 seconds	WeChat	N/A	73	Male	21-23	I'm studying in a specialist	B. Low-intensity and low-tension sports (such as recreational volleyball, table tennis, jogging, Tai Chi, etc.)	B. 11 to 20 minutes	A. Less than once A month	F. Tai Chi, science of health preserving I. Other	E. Extremely in line with me	A. Not at all.	E. Extremely in line with me	E. Extremely in line with me	D. Very much in line with me	D. Very much in line with me	C. Consistent with my moderate intensity	B. a little bit in line with me.	A. Not at all.	D. Very much in line with me	A. Not at all.	B. a little bit in line with me.	C. Consistent with my moderate intensity	B. a little bit in line with me.	E. Extremely in line with me	Yes	Yes	Yes	No	Yes	No	No	Yes	Yes	Yes	Yes	No	Yes	Yes	No	Not sure	Extremely inconsistent	Does not match	Not sure	Conform	Extremely inconsistent	Conform
265	2024/7/5 20:57:48	514 seconds	WeChat	N/A	121	Female	24-26	I'm studying for a master's degree	B. Low-intensity and low-tension sports (such as recreational volleyball, table tennis, jogging, Tai Chi, etc.)	C. 21 to 30 minutes	D. Approximately once a day	B. Travel and outing E. Rope skipping	E. Extremely in line with me	D. Very much in line with me	C. Consistent with my moderate intensity	E. Extremely in line with me	E. Extremely in line with me	B. a little bit in line with me.	D. Very much in line with me	C. Consistent with my moderate intensity	E. Extremely in line with me	C. Consistent with my moderate intensity	E. Extremely in line with me	D. Very much in line with me	D. Very much in line with me	D. Very much in line with me	B. a little bit in line with me.	No	Yes	Yes	Yes	Yes	Yes	Yes	Yes	Yes	No	Yes	Yes	No	Yes	No	Extremely in line	Conform	Conform	Not sure	Conform	Conform	Not sure
266	2024/7/5 20:57:53	496 seconds	WeChat	N/A	126	Male	18-20	Undergraduate study	B. Low-intensity and low-tension sports (such as recreational volleyball, table tennis, jogging, Tai Chi, etc.)	B. 11 to 20 minutes	C. Two to three times a month	C. Sports Dance G. Exercise Machine Activities	D. Very much in line with me	D. Very much in line with me	B. a little bit in line with me.	E. Extremely in line with me	D. Very much in line with me	A. Not at all.	D. Very much in line with me	D. Very much in line with me	C. Consistent with my moderate intensity	B. a little bit in line with me.	E. Extremely in line with me	E. Extremely in line with me	D. Very much in line with me	D. Very much in line with me	B. a little bit in line with me.	Yes	Yes	Yes	No	Yes	Yes	No	Yes	No	No	Yes	Yes	Yes	No	Yes	Extremely in line	Conform	Extremely in line	Conform	Extremely in line	Extremely in line	Conform
267	2024/7/5 20:57:53	471 seconds	WeChat	N/A	125	Female	27-29	The doctor is studying	A. Light exercise (such as walking, doing radio gymnastics, playing gateball, etc.)	B. 11 to 20 minutes	A. Less than once A month	B. Travel, outing G. Fitness equipment activities H. Swimming	E. Extremely in line with me	D. Very much in line with me	B. a little bit in line with me.	C. Consistent with my moderate intensity	E. Extremely in line with me	A. Not at all.	D. Very much in line with me	D. Very much in line with me	D. Very much in line with me	A. Not at all.	D. Very much in line with me	E. Extremely in line with me	D. Very much in line with me	D. Very much in line with me	A. Not at all.	Yes	Yes	No	No	Yes	Yes	Yes	Yes	Yes	No	Yes	Yes	Yes	Yes	Yes	Extremely in line	Conform	Conform	Not sure	Extremely in line	Conform	Extremely in line
268	2024/7/5 20:57:58	552 seconds	WeChat	N/A	129	Female	18-20	Undergraduate study	B. Low-intensity and low-tension sports (such as recreational volleyball, table tennis, jogging, Tai Chi, etc.)	D. 31 to 59 minutes	B. Three to five times a week	A. Walking and running E. Skipping rope	E. Extremely in line with me	D. Very much in line with me	B. a little bit in line with me.	E. Extremely in line with me	E. Extremely in line with me	B. a little bit in line with me.	E. Extremely in line with me	D. Very much in line with me	E. Extremely in line with me	A. Not at all.	C. Consistent with my moderate intensity	E. Extremely in line with me	D. Very much in line with me	E. Extremely in line with me	A. Not at all.	Yes	Yes	No	No	No	No	No	Yes	Yes	Yes	Yes	Yes	Yes	Yes	Yes	Conform	Extremely in line	Conform	Conform	Not sure	Conform	Extremely in line
269	2024/7/5 20:58:05	419 seconds	WeChat	N/A	127	Male	18-20	Undergraduate study	E. High-intensity and sustained exercise with shortness of breath and a lot of sweating (such as running, aerobics sets, swimming, etc.)	A. Less than 10 minutes	C. Two to three times a month	D. Ball games E. Rope skipping	E. Extremely in line with me	E. Extremely in line with me	C. Consistent with my moderate intensity	D. Very much in line with me	E. Extremely in line with me	C. Consistent with my moderate intensity	C. Consistent with my moderate intensity	D. Very much in line with me	E. Extremely in line with me	B. a little bit in line with me.	E. Extremely in line with me	D. Very much in line with me	D. Very much in line with me	E. Extremely in line with me	A. Not at all.	Yes	No	No	No	No	Yes	No	Yes	Yes	Yes	Yes	No	Yes	Yes	Yes	Conform	Extremely in line	Not sure	Extremely in line	Extremely in line	Conform	Extremely in line
270	2024/7/5 20:58:10	488 seconds	WeChat	N/A	127	Male	24-26	I'm studying for a master's degree	B. Low-intensity and low-tension sports (such as recreational volleyball, table tennis, jogging, Tai Chi, etc.)	E. More than 60 minutes	A. Less than once A month	A. Walking and running C. Sports dance E. Skipping rope	D. Very much in line with me	E. Extremely in line with me	B. a little bit in line with me.	D. Very much in line with me	D. Very much in line with me	A. Not at all.	E. Extremely in line with me	D. Very much in line with me	D. Very much in line with me	C. Consistent with my moderate intensity	E. Extremely in line with me	E. Extremely in line with me	E. Extremely in line with me	E. Extremely in line with me	B. a little bit in line with me.	Yes	Yes	Yes	No	Yes	Yes	Yes	Yes	Yes	Yes	No	Yes	Yes	Yes	Yes	Extremely in line	Not sure	Extremely in line	Extremely in line	Conform	Conform	Not sure
271	2024/7/5 20:58:16	521 seconds	WeChat	N/A	131	Male	21-23	Undergraduate study	B. Low-intensity and low-tension sports (such as recreational volleyball, table tennis, jogging, Tai Chi, etc.)	C. 21 to 30 minutes	D. Approximately once a day	A. Walking and running F. Tai Chi and science of health preserving.	D. Very much in line with me	E. Extremely in line with me	B. a little bit in line with me.	E. Extremely in line with me	E. Extremely in line with me	A. Not at all.	E. Extremely in line with me	E. Extremely in line with me	D. Very much in line with me	B. a little bit in line with me.	D. Very much in line with me	E. Extremely in line with me	D. Very much in line with me	E. Extremely in line with me	B. a little bit in line with me.	No	Yes	No	No	Yes	Yes	Yes	Yes	Yes	Yes	Yes	Yes	Yes	Yes	Yes	Extremely in line	Conform	Conform	Conform	Extremely in line	Conform	Extremely in line
272	2024/7/5 20:58:18	511 seconds	WeChat	N/A	128	Female	27-29	I'm studying for a master's degree	A. Light exercise (such as walking, doing radio gymnastics, playing gateball, etc.)	C. 21 to 30 minutes	B. Three to five times a week	D. Ball Games G. Exercise Machine Activities H. Swimming	E. Extremely in line with me	D. Very much in line with me	A. Not at all.	E. Extremely in line with me	E. Extremely in line with me	B. a little bit in line with me.	D. Very much in line with me	D. Very much in line with me	D. Very much in line with me	A. Not at all.	D. Very much in line with me	E. Extremely in line with me	E. Extremely in line with me	C. Consistent with my moderate intensity	A. Not at all.	Yes	No	No	No	Yes	Yes	Yes	Yes	Yes	Yes	Yes	Yes	Yes	Yes	Yes	Extremely in line	Extremely in line	Conform	Conform	Not sure	Extremely in line	Extremely in line
273	2024/7/5 20:58:23	494 seconds	WeChat	N/A	131	Male	24-26	I'm studying for a master's degree	E. High-intensity and sustained exercise with shortness of breath and a lot of sweating (such as running, aerobics sets, swimming, etc.)	A. Less than 10 minutes	D. Approximately once a day	B. Travel, outing E. Rope skipping F. Tai Chi, science of health preserving.	E. Extremely in line with me	C. Consistent with my moderate intensity	B. a little bit in line with me.	E. Extremely in line with me	C. Consistent with my moderate intensity	A. Not at all.	C. Consistent with my moderate intensity	C. Consistent with my moderate intensity	E. Extremely in line with me	B. a little bit in line with me.	C. Consistent with my moderate intensity	E. Extremely in line with me	D. Very much in line with me	D. Very much in line with me	A. Not at all.	Yes	Yes	No	Yes	Yes	Yes	Yes	Yes	Yes	Yes	Yes	Yes	Yes	Yes	Yes	Extremely in line	Conform	Extremely in line	Extremely in line	Conform	Conform	Extremely in line
274	2024/7/5 20:58:24	550 seconds	WeChat	N/A	128	Male	21-23	I'm studying in a specialist	A. Light exercise (such as walking, doing radio gymnastics, playing gateball, etc.)	B. 11 to 20 minutes	B. Three to five times a week	B. Travel and outing C. Sports dance E. Skipping rope	E. Extremely in line with me	D. Very much in line with me	B. a little bit in line with me.	D. Very much in line with me	E. Extremely in line with me	A. Not at all.	D. Very much in line with me	D. Very much in line with me	E. Extremely in line with me	A. Not at all.	D. Very much in line with me	D. Very much in line with me	D. Very much in line with me	E. Extremely in line with me	A. Not at all.	Yes	No	No	Yes	No	Yes	Yes	Yes	Yes	Yes	Yes	Yes	No	Yes	Yes	Extremely in line	Not sure	Conform	Conform	Extremely in line	Extremely in line	Extremely in line
275	2024/7/5 20:58:31	555 seconds	WeChat	N/A	133	Male	18-20	I'm studying in a specialist	B. Low-intensity and low-tension sports (such as recreational volleyball, table tennis, jogging, Tai Chi, etc.)	C. 21 to 30 minutes	C. Two to three times a month	A. Walking and running B. Travel and outing	E. Extremely in line with me	C. Consistent with my moderate intensity	A. Not at all.	D. Very much in line with me	E. Extremely in line with me	B. a little bit in line with me.	E. Extremely in line with me	D. Very much in line with me	C. Consistent with my moderate intensity	A. Not at all.	E. Extremely in line with me	E. Extremely in line with me	D. Very much in line with me	E. Extremely in line with me	A. Not at all.	Yes	Yes	Yes	No	Yes	Yes	Yes	Yes	Yes	Yes	Yes	Yes	Yes	No	Yes	Not sure	Extremely in line	Extremely in line	Extremely in line	Extremely in line	Conform	Extremely in line
276	2024/7/5 20:58:33	421 seconds	WeChat	N/A	129	Female	24-26	I'm studying for a master's degree	A. Light exercise (such as walking, doing radio gymnastics, playing gateball, etc.)	B. 11 to 20 minutes	D. Approximately once a day	C. Sports Dance F. Tai Chi and science of health preserving.	E. Extremely in line with me	D. Very much in line with me	B. a little bit in line with me.	D. Very much in line with me	E. Extremely in line with me	C. Consistent with my moderate intensity	E. Extremely in line with me	D. Very much in line with me	E. Extremely in line with me	C. Consistent with my moderate intensity	E. Extremely in line with me	E. Extremely in line with me	D. Very much in line with me	E. Extremely in line with me	C. Consistent with my moderate intensity	Yes	Yes	Yes	Yes	Yes	Yes	Yes	No	Yes	Yes	No	Yes	Yes	Yes	Yes	Conform	Extremely in line	Conform	Not sure	Extremely in line	Extremely in line	Conform
277	2024/7/5 20:58:37	466 seconds	WeChat	N/A	131	Female	18-20	Undergraduate study	C. Moderate intensity and more intense and lasting exercise (such as cycling, running, playing table tennis, etc.)	B. 11 to 20 minutes	C. Two to three times a month	B. Travel and outing E. Rope skipping	E. Extremely in line with me	E. Extremely in line with me	B. a little bit in line with me.	D. Very much in line with me	E. Extremely in line with me	A. Not at all.	C. Consistent with my moderate intensity	D. Very much in line with me	D. Very much in line with me	B. a little bit in line with me.	D. Very much in line with me	E. Extremely in line with me	D. Very much in line with me	D. Very much in line with me	A. Not at all.	No	Yes	Yes	No	Yes	No	Yes	Yes	Yes	Yes	Yes	Yes	No	Yes	Yes	Extremely in line	Conform	Extremely in line	Extremely in line	Extremely in line	Extremely in line	Extremely in line
278	2024/7/5 20:58:39	517 seconds	WeChat	N/A	128	Male	33 and above	I'm studying for a master's degree	C. Moderate intensity and more intense and lasting exercise (such as cycling, running, playing table tennis, etc.)	E. More than 60 minutes	D. Approximately once a day	B. Travel, outing E. Rope skipping F. Tai Chi, science of health preserving.	E. Extremely in line with me	E. Extremely in line with me	B. a little bit in line with me.	E. Extremely in line with me	E. Extremely in line with me	A. Not at all.	D. Very much in line with me	D. Very much in line with me	E. Extremely in line with me	C. Consistent with my moderate intensity	D. Very much in line with me	E. Extremely in line with me	C. Consistent with my moderate intensity	D. Very much in line with me	A. Not at all.	No	No	No	No	Yes	Yes	Yes	Yes	Yes	No	Yes	No	Yes	Yes	Yes	Conform	Conform	Extremely in line	Conform	Extremely in line	Conform	Conform
279	2024/7/5 20:58:46	500 seconds	WeChat	N/A	125	Male	24-26	I'm studying for a master's degree	C. Moderate intensity and more intense and lasting exercise (such as cycling, running, playing table tennis, etc.)	A. Less than 10 minutes	C. 2 to 3 times a month	B. Travel, outings H. Swimming	C. Consistent with my moderate intensity	C. Consistent with my moderate intensity	A. Not at all.	E. Extremely in line with me	C. Consistent with my moderate intensity	A. Not at all.	E. Extremely in line with me	D. Very much in line with me	D. Very much in line with me	B. a little bit in line with me.	E. Extremely in line with me	E. Extremely in line with me	D. Very much in line with me	E. Extremely in line with me	C. Consistent with my moderate intensity	No	Yes	No	Yes	Yes	No	Yes	Yes	Yes	Yes	No	Yes	Yes	No	No	Extremely in line	Extremely in line	Conform	Conform	Extremely in line	Extremely in line	Extremely in line
280	2024/7/5 20:58:47	523 seconds	WeChat	N/A	130	Female	21-23	I'm studying in a specialist	B. Low-intensity and low-tension sports (such as recreational volleyball, table tennis, jogging, Tai Chi, etc.)	E. More than 60 minutes	E. 1-2 times per week	D. Ball games G. Exercise equipment activities	D. Very much in line with me	D. Very much in line with me	A. Not at all.	D. Very much in line with me	E. Extremely in line with me	A. Not at all.	C. Consistent with my moderate intensity	D. Very much in line with me	E. Extremely in line with me	B. a little bit in line with me.	E. Extremely in line with me	D. Very much in line with me	E. Extremely in line with me	D. Very much in line with me	B. a little bit in line with me.	Yes	Yes	Yes	No	Yes	Yes	No	Yes	Yes	Yes	No	Yes	Yes	Yes	Yes	Conform	Not sure	Not sure	Not sure	Conform	Extremely in line	Extremely in line
281	2024/7/5 20:58:52	537 seconds	WeChat	N/A	126	Female	27-29	I'm studying for a master's degree	C. Moderate intensity and more intense and lasting exercise (such as cycling, running, playing table tennis, etc.)	C. 21 to 30 minutes	C. Two to three times a month	A. Walking, running B. Travel, outing G. Fitness equipment activities	D. Very much in line with me	D. Very much in line with me	A. Not at all.	D. Very much in line with me	D. Very much in line with me	A. Not at all.	E. Extremely in line with me	D. Very much in line with me	E. Extremely in line with me	B. a little bit in line with me.	D. Very much in line with me	D. Very much in line with me	E. Extremely in line with me	C. Consistent with my moderate intensity	B. a little bit in line with me.	No	Yes	Yes	No	Yes	Yes	Yes	No	Yes	Yes	Yes	Yes	Yes	Yes	Yes	Conform	Conform	Extremely in line	Conform	Not sure	Not sure	Not sure
282	2024/7/5 20:58:59	540 seconds	WeChat	N/A	128	Female	18-20	Undergraduate study	E. High-intensity and sustained exercise with shortness of breath and a lot of sweating (such as running, aerobics sets, swimming, etc.)	D. 31 to 59 minutes	D. Approximately once a day	A. Walking, running F. Tai Chi, science of health preserving H. Swimming	E. Extremely in line with me	E. Extremely in line with me	B. a little bit in line with me.	D. Very much in line with me	E. Extremely in line with me	B. a little bit in line with me.	D. Very much in line with me	D. Very much in line with me	C. Consistent with my moderate intensity	A. Not at all.	C. Consistent with my moderate intensity	D. Very much in line with me	D. Very much in line with me	E. Extremely in line with me	A. Not at all.	Yes	Yes	No	No	No	Yes	Yes	Yes	Yes	No	Yes	No	Yes	Yes	Yes	Conform	Conform	Extremely in line	Conform	Extremely in line	Conform	Not sure
283	2024/7/5 20:59:01	520 seconds	WeChat	N/A	125	Male	24-26	I'm studying for a master's degree	B. Low-intensity and low-tension sports (such as recreational volleyball, table tennis, jogging, Tai Chi, etc.)	D. 31 to 59 minutes	A. Less than once A month	A. Walking, running B. Travel, outing C. Sports dance	D. Very much in line with me	E. Extremely in line with me	B. a little bit in line with me.	E. Extremely in line with me	C. Consistent with my moderate intensity	B. a little bit in line with me.	E. Extremely in line with me	D. Very much in line with me	D. Very much in line with me	C. Consistent with my moderate intensity	E. Extremely in line with me	D. Very much in line with me	D. Very much in line with me	E. Extremely in line with me	B. a little bit in line with me.	Yes	Yes	Yes	No	No	Yes	Yes	Yes	Yes	Yes	Yes	Yes	Yes	Yes	Yes	Extremely in line	Extremely in line	Conform	Conform	Extremely in line	Conform	Conform
284	2024/7/5 20:59:11	393 seconds	WeChat	N/A	125	Male	24-26	The doctor is studying	B. Low-intensity and low-tension sports (such as recreational volleyball, table tennis, jogging, Tai Chi, etc.)	D. 31 to 59 minutes	C. Two to three times a month	D. Ball games F. Tai Chi and science of health preserving.	D. Very much in line with me	D. Very much in line with me	B. a little bit in line with me.	C. Consistent with my moderate intensity	D. Very much in line with me	A. Not at all.	E. Extremely in line with me	E. Extremely in line with me	D. Very much in line with me	C. Consistent with my moderate intensity	E. Extremely in line with me	D. Very much in line with me	C. Consistent with my moderate intensity	E. Extremely in line with me	C. Consistent with my moderate intensity	No	Yes	No	Yes	No	Yes	Yes	No	Yes	Yes	Yes	Yes	Yes	Yes	No	Extremely in line	Conform	Conform	Conform	Extremely in line	Extremely in line	Conform
285	2024/7/5 20:59:15	402 seconds	WeChat	N/A	129	Female	21-23	I'm studying in a specialist	C. Moderate intensity and more intense and lasting exercise (such as cycling, running, playing table tennis, etc.)	D. 31 to 59 minutes	C. 2 to 3 times a month	A. Walking, running B. Travel, outing C. Sports dance	D. Very much in line with me	E. Extremely in line with me	B. a little bit in line with me.	D. Very much in line with me	E. Extremely in line with me	A. Not at all.	E. Extremely in line with me	C. Consistent with my moderate intensity	E. Extremely in line with me	A. Not at all.	E. Extremely in line with me	E. Extremely in line with me	D. Very much in line with me	E. Extremely in line with me	A. Not at all.	Yes	No	Yes	No	No	No	Yes	Yes	Yes	Yes	Yes	Yes	Yes	No	Yes	Conform	Not sure	Conform	Conform	Extremely in line	Conform	Conform
286	2024/7/5 20:59:20	486 seconds	WeChat	N/A	127	Female	30-32	I'm studying for a master's degree	C. Moderate intensity and more intense and lasting exercise (such as cycling, running, playing table tennis, etc.)	C. 21 to 30 minutes	C. 2 to 3 times a month	A. Walking and running H. Swimming	E. Extremely in line with me	E. Extremely in line with me	A. Not at all.	E. Extremely in line with me	D. Very much in line with me	A. Not at all.	E. Extremely in line with me	D. Very much in line with me	E. Extremely in line with me	B. a little bit in line with me.	D. Very much in line with me	E. Extremely in line with me	D. Very much in line with me	D. Very much in line with me	B. a little bit in line with me.	No	Yes	Yes	No	No	No	Yes	No	Yes	Yes	Yes	Yes	No	Yes	Yes	Conform	Conform	Conform	Not sure	Conform	Conform	Conform
287	2024/7/5 20:59:26	540 seconds	WeChat	N/A	121	Female	18-20	Undergraduate study	C. Moderate intensity and more intense and lasting exercise (such as cycling, running, playing table tennis, etc.)	C. 21 to 30 minutes	D. Approximately once a day	B. Travel, outing D. Ball games H. Swimming	E. Extremely in line with me	E. Extremely in line with me	B. a little bit in line with me.	D. Very much in line with me	E. Extremely in line with me	B. a little bit in line with me.	C. Consistent with my moderate intensity	D. Very much in line with me	E. Extremely in line with me	B. a little bit in line with me.	D. Very much in line with me	D. Very much in line with me	C. Consistent with my moderate intensity	D. Very much in line with me	B. a little bit in line with me.	Yes	Yes	Yes	No	Yes	No	Yes	No	No	Yes	No	Yes	No	Yes	No	Extremely in line	Conform	Conform	Conform	Conform	Not sure	Conform
288	2024/7/5 20:59:29	458 seconds	WeChat	N/A	135	Male	24-26	I'm studying for a master's degree	C. Moderate intensity and more intense and lasting exercise (such as cycling, running, playing table tennis, etc.)	C. 21 to 30 minutes	D. Approximately once a day	A. Walking and running H. Swimming	D. Very much in line with me	D. Very much in line with me	A. Not at all.	E. Extremely in line with me	E. Extremely in line with me	A. Not at all.	E. Extremely in line with me	D. Very much in line with me	D. Very much in line with me	B. a little bit in line with me.	E. Extremely in line with me	E. Extremely in line with me	C. Consistent with my moderate intensity	D. Very much in line with me	A. Not at all.	Yes	Yes	Yes	No	No	Yes	Yes	Yes	Yes	No	No	Yes	Yes	Yes	No	Extremely in line	Conform	Extremely in line	Extremely in line	Extremely in line	Extremely in line	Conform
289	2024/7/5 20:59:33	497 seconds	WeChat	N/A	129	Female	21-23	Undergraduate study	B. Low-intensity and low-tension sports (such as recreational volleyball, table tennis, jogging, Tai Chi, etc.)	E. More than 60 minutes	E. 1-2 times per week	A. Walking and running E. Skipping rope	E. Extremely in line with me	E. Extremely in line with me	A. Not at all.	D. Very much in line with me	D. Very much in line with me	A. Not at all.	D. Very much in line with me	D. Very much in line with me	D. Very much in line with me	B. a little bit in line with me.	E. Extremely in line with me	E. Extremely in line with me	D. Very much in line with me	E. Extremely in line with me	A. Not at all.	Yes	Yes	No	Yes	Yes	Yes	Yes	No	Yes	No	Yes	Yes	Yes	Yes	Yes	Not sure	Conform	Extremely in line	Conform	Conform	Not sure	Not sure
290	2024/7/5 20:59:37	437 seconds	WeChat	N/A	130	Female	24-26	I'm studying for a master's degree	D. High-intensity but not sustained exercise with shortness of breath and a lot of sweating (such as playing badminton, basketball, tennis, football, etc.)	C. 21 to 30 minutes	B. Three to five times a week	A. Walking and running F. Tai Chi and science of health preserving.	C. Consistent with my moderate intensity	E. Extremely in line with me	B. a little bit in line with me.	E. Extremely in line with me	E. Extremely in line with me	A. Not at all.	E. Extremely in line with me	D. Very much in line with me	E. Extremely in line with me	B. a little bit in line with me.	E. Extremely in line with me	E. Extremely in line with me	D. Very much in line with me	D. Very much in line with me	A. Not at all.	No	Yes	No	No	Yes	No	Yes	Yes	Yes	Yes	Yes	Yes	Yes	Yes	No	Conform	Conform	Conform	Extremely in line	Conform	Not sure	Extremely in line
291	2024/7/5 20:59:39	506 seconds	WeChat	N/A	124	Male	18-20	Undergraduate study	B. Low-intensity and low-tension sports (such as recreational volleyball, table tennis, jogging, Tai Chi, etc.)	D. 31 to 59 minutes	C. 2 to 3 times a month	F. Tai Chi, science of health preserving H. Swimming I. Other	E. Extremely in line with me	C. Consistent with my moderate intensity	B. a little bit in line with me.	E. Extremely in line with me	E. Extremely in line with me	C. Consistent with my moderate intensity	E. Extremely in line with me	E. Extremely in line with me	C. Consistent with my moderate intensity	B. a little bit in line with me.	D. Very much in line with me	D. Very much in line with me	D. Very much in line with me	C. Consistent with my moderate intensity	A. Not at all.	Yes	Yes	Yes	Yes	No	Yes	No	Yes	Yes	Yes	No	Yes	No	Yes	Yes	Not sure	Extremely in line	Extremely in line	Conform	Extremely in line	Conform	Conform
292	2024/7/5 20:59:45	539 seconds	WeChat	N/A	130	Female	21-23	Undergraduate study	C. Moderate intensity and more intense and lasting exercise (such as cycling, running, playing table tennis, etc.)	C. 21 to 30 minutes	C. Two to three times a month	B. Travel, outings H. Swimming	E. Extremely in line with me	C. Consistent with my moderate intensity	B. a little bit in line with me.	E. Extremely in line with me	E. Extremely in line with me	A. Not at all.	E. Extremely in line with me	D. Very much in line with me	E. Extremely in line with me	A. Not at all.	E. Extremely in line with me	D. Very much in line with me	D. Very much in line with me	D. Very much in line with me	B. a little bit in line with me.	Yes	Yes	No	No	No	Yes	Yes	Yes	No	Yes	No	Yes	Yes	No	Yes	Extremely in line	Conform	Extremely in line	Conform	Extremely in line	Extremely in line	Not sure
293	2024/7/5 20:59:47	524 seconds	WeChat	N/A	132	Male	27-29	I'm studying for a master's degree	D. High-intensity but not sustained exercise with shortness of breath and a lot of sweating (such as playing badminton, basketball, tennis, football, etc.)	A. Less than 10 minutes	C. Two to three times a month	B. Travel, outing C. Sports dance G. Fitness equipment activities	E. Extremely in line with me	D. Very much in line with me	B. a little bit in line with me.	D. Very much in line with me	E. Extremely in line with me	A. Not at all.	E. Extremely in line with me	D. Very much in line with me	E. Extremely in line with me	A. Not at all.	E. Extremely in line with me	E. Extremely in line with me	E. Extremely in line with me	E. Extremely in line with me	B. a little bit in line with me.	No	Yes	No	No	Yes	Yes	Yes	Yes	Yes	Yes	Yes	Yes	Yes	Yes	No	Conform	Conform	Extremely in line	Extremely in line	Conform	Extremely in line	Extremely in line
294	2024/7/5 20:59:53	495 seconds	WeChat	N/A	130	Male	24-26	I'm studying for a master's degree	B. Low-intensity and low-tension sports (such as recreational volleyball, table tennis, jogging, Tai Chi, etc.)	B. 11 to 20 minutes	C. 2 to 3 times a month	A. Walking and running D. Ball games E. Skipping rope	E. Extremely in line with me	D. Very much in line with me	B. a little bit in line with me.	C. Consistent with my moderate intensity	E. Extremely in line with me	A. Not at all.	E. Extremely in line with me	D. Very much in line with me	D. Very much in line with me	B. a little bit in line with me.	E. Extremely in line with me	D. Very much in line with me	D. Very much in line with me	E. Extremely in line with me	A. Not at all.	Yes	Yes	Yes	No	No	Yes	No	Yes	Yes	Yes	Yes	Yes	Yes	No	Yes	Extremely in line	Conform	Conform	Extremely in line	Conform	Extremely in line	Extremely in line
295	2024/7/5 20:59:54	442 seconds	WeChat	N/A	129	Male	18-20	Undergraduate study	D. High-intensity but not sustained exercise with shortness of breath and a lot of sweating (such as playing badminton, basketball, tennis, football, etc.)	C. 21 to 30 minutes	D. Approximately once a day	A. Walking, running B. Travel, outing C. Sports dance	D. Very much in line with me	E. Extremely in line with me	B. a little bit in line with me.	D. Very much in line with me	E. Extremely in line with me	B. a little bit in line with me.	D. Very much in line with me	D. Very much in line with me	E. Extremely in line with me	A. Not at all.	D. Very much in line with me	D. Very much in line with me	E. Extremely in line with me	E. Extremely in line with me	A. Not at all.	Yes	Yes	Yes	No	Yes	Yes	No	Yes	Yes	Yes	No	No	Yes	No	Yes	Conform	Not sure	Extremely in line	Conform	Extremely in line	Conform	Not sure
296	2024/7/5 21:00:01	453 seconds	WeChat	N/A	122	Male	27-29	I'm studying for a master's degree	B. Low-intensity and low-tension sports (such as recreational volleyball, table tennis, jogging, Tai Chi, etc.)	D. 31 to 59 minutes	D. Approximately once a day	C. Sports Dance D. Ball Games	E. Extremely in line with me	C. Consistent with my moderate intensity	C. Consistent with my moderate intensity	E. Extremely in line with me	C. Consistent with my moderate intensity	C. Consistent with my moderate intensity	D. Very much in line with me	D. Very much in line with me	C. Consistent with my moderate intensity	B. a little bit in line with me.	D. Very much in line with me	E. Extremely in line with me	E. Extremely in line with me	C. Consistent with my moderate intensity	A. Not at all.	Yes	Yes	Yes	No	Yes	No	No	No	Yes	Yes	Yes	No	Yes	Yes	Yes	Conform	Extremely in line	Conform	Conform	Extremely in line	Conform	Extremely in line
297	2024/7/5 21:00:05	443 seconds	WeChat	N/A	129	Female	18-20	Undergraduate study	C. Moderate intensity and more intense and lasting exercise (such as cycling, running, playing table tennis, etc.)	D. 31 to 59 minutes	C. Two to three times a month	D. Balls I. Others	E. Extremely in line with me	D. Very much in line with me	B. a little bit in line with me.	D. Very much in line with me	C. Consistent with my moderate intensity	A. Not at all.	E. Extremely in line with me	D. Very much in line with me	D. Very much in line with me	C. Consistent with my moderate intensity	D. Very much in line with me	E. Extremely in line with me	E. Extremely in line with me	E. Extremely in line with me	A. Not at all.	Yes	No	No	Yes	Yes	No	Yes	Yes	Yes	No	Yes	Yes	Yes	No	Yes	Conform	Conform	Extremely in line	Conform	Conform	Extremely in line	Conform
298	2024/7/5 21:00:20	549 seconds	WeChat	N/A	128	Male	18-20	I'm studying in a specialist	C. Moderate intensity and more intense and lasting exercise (such as cycling, running, playing table tennis, etc.)	D. 31 to 59 minutes	B. Three to five times a week	B. Tourism and outing D. Ball games	D. Very much in line with me	E. Extremely in line with me	B. a little bit in line with me.	C. Consistent with my moderate intensity	E. Extremely in line with me	B. a little bit in line with me.	E. Extremely in line with me	D. Very much in line with me	E. Extremely in line with me	A. Not at all.	C. Consistent with my moderate intensity	E. Extremely in line with me	D. Very much in line with me	D. Very much in line with me	B. a little bit in line with me.	Yes	Yes	No	Yes	Yes	No	No	Yes	Yes	No	Yes	Yes	Yes	Yes	No	Extremely in line	Extremely in line	Conform	Extremely in line	Extremely in line	Conform	Conform
299	2024/7/5 21:00:30	455 seconds	WeChat	N/A	130	Female	21-23	I'm studying in a specialist	B. Low-intensity and low-tension sports (such as recreational volleyball, table tennis, jogging, Tai Chi, etc.)	C. 21 to 30 minutes	B. Three to five times a week	A. Walking and running F. Tai Chi and science of health preserving.	E. Extremely in line with me	D. Very much in line with me	B. a little bit in line with me.	D. Very much in line with me	E. Extremely in line with me	A. Not at all.	E. Extremely in line with me	D. Very much in line with me	E. Extremely in line with me	A. Not at all.	D. Very much in line with me	D. Very much in line with me	E. Extremely in line with me	E. Extremely in line with me	A. Not at all.	Yes	Yes	No	Yes	Yes	Yes	Yes	Yes	Yes	No	Yes	No	Yes	Yes	Yes	Conform	Extremely in line	Extremely in line	Extremely in line	Conform	Extremely in line	Extremely in line
300	2024/7/5 21:00:38	475 seconds	WeChat	N/A	125	Female	21-23	Undergraduate study	D. High-intensity but not sustained exercise with shortness of breath and a lot of sweating (such as playing badminton, basketball, tennis, football, etc.)	B. 11 to 20 minutes	B. Three to five times a week	B. Tourism and outing D. Ball games	E. Extremely in line with me	E. Extremely in line with me	A. Not at all.	C. Consistent with my moderate intensity	E. Extremely in line with me	C. Consistent with my moderate intensity	C. Consistent with my moderate intensity	D. Very much in line with me	D. Very much in line with me	B. a little bit in line with me.	E. Extremely in line with me	D. Very much in line with me	E. Extremely in line with me	C. Consistent with my moderate intensity	C. Consistent with my moderate intensity	Yes	Yes	Yes	No	Yes	No	No	Yes	Yes	Yes	Yes	Yes	Yes	Yes	Yes	Conform	Extremely in line	Conform	Extremely in line	Extremely in line	Conform	Conform
301	2024/7/5 21:00:44	443 seconds	WeChat	N/A	120	Female	18-20	Undergraduate study	A. Light exercise (such as walking, doing radio gymnastics, playing gateball, etc.)	C. 21 to 30 minutes	C. Two to three times a month	A. Walking and running G. Exercise equipment activities	D. Very much in line with me	D. Very much in line with me	B. a little bit in line with me.	C. Consistent with my moderate intensity	D. Very much in line with me	A. Not at all.	D. Very much in line with me	D. Very much in line with me	D. Very much in line with me	B. a little bit in line with me.	C. Consistent with my moderate intensity	D. Very much in line with me	E. Extremely in line with me	E. Extremely in line with me	B. a little bit in line with me.	Yes	Yes	Yes	Yes	No	Yes	Yes	No	Yes	No	Yes	No	Yes	Yes	Yes	Conform	Not sure	Conform	Conform	Extremely in line	Conform	Not sure
302	2024/7/5 21:01:00	520 seconds	WeChat	N/A	122	Male	21-23	Undergraduate study	C. Moderate intensity and more intense and lasting exercise (such as cycling, running, playing table tennis, etc.)	B. 11 to 20 minutes	A. Less than once A month	A. Walking and running E. Skipping rope F. Tai Chi and science of health preserving.	C. Consistent with my moderate intensity	E. Extremely in line with me	A. Not at all.	D. Very much in line with me	D. Very much in line with me	A. Not at all.	D. Very much in line with me	D. Very much in line with me	E. Extremely in line with me	B. a little bit in line with me.	D. Very much in line with me	E. Extremely in line with me	D. Very much in line with me	E. Extremely in line with me	B. a little bit in line with me.	No	Yes	Yes	No	Yes	Yes	No	Yes	Yes	Yes	Yes	No	Yes	Yes	Yes	Not sure	Conform	Conform	Conform	Conform	Conform	Extremely in line
303	2024/7/5 21:01:34	500 seconds	WeChat	N/A	118	Male	18-20	Undergraduate study	A. Light exercise (such as walking, doing radio gymnastics, playing gateball, etc.)	D. 31 to 59 minutes	C. Two to three times a month	B. Travel and outing D. Ball games E. Skipping rope	E. Extremely in line with me	D. Very much in line with me	B. a little bit in line with me.	D. Very much in line with me	C. Consistent with my moderate intensity	A. Not at all.	D. Very much in line with me	D. Very much in line with me	C. Consistent with my moderate intensity	A. Not at all.	C. Consistent with my moderate intensity	E. Extremely in line with me	D. Very much in line with me	C. Consistent with my moderate intensity	B. a little bit in line with me.	No	Yes	No	No	Yes	Yes	Yes	No	Yes	No	No	No	No	Yes	Yes	Conform	Conform	Extremely in line	Conform	Conform	Extremely in line	Conform
304	2024/7/5 21:02:03	494 seconds	WeChat	N/A	126	Male	21-23	I'm studying in a specialist	D. High-intensity but not sustained exercise with shortness of breath and a lot of sweating (such as playing badminton, basketball, tennis, football, etc.)	C. 21 to 30 minutes	E. 1-2 times per week	B. Travel, outing C. Sports dance G. Fitness equipment activities	D. Very much in line with me	D. Very much in line with me	B. a little bit in line with me.	C. Consistent with my moderate intensity	E. Extremely in line with me	B. a little bit in line with me.	E. Extremely in line with me	D. Very much in line with me	E. Extremely in line with me	B. a little bit in line with me.	D. Very much in line with me	C. Consistent with my moderate intensity	D. Very much in line with me	D. Very much in line with me	B. a little bit in line with me.	No	Yes	Yes	No	Yes	Yes	Yes	Yes	No	No	No	Yes	Yes	Yes	Yes	Extremely in line	Not sure	Extremely in line	Conform	Not sure	Conform	Conform
305	2024/7/5 21:02:08	509 seconds	WeChat	N/A	131	Male	18-20	I'm studying in a specialist	B. Low-intensity and low-tension sports (such as recreational volleyball, table tennis, jogging, Tai Chi, etc.)	C. 21 to 30 minutes	B. Three to five times a week	D. Ball games H. Swimming	D. Very much in line with me	E. Extremely in line with me	A. Not at all.	D. Very much in line with me	C. Consistent with my moderate intensity	B. a little bit in line with me.	E. Extremely in line with me	D. Very much in line with me	D. Very much in line with me	B. a little bit in line with me.	E. Extremely in line with me	E. Extremely in line with me	E. Extremely in line with me	D. Very much in line with me	B. a little bit in line with me.	No	No	Yes	Yes	Yes	Yes	Yes	Yes	Yes	No	Yes	Yes	Yes	Yes	Yes	Conform	Extremely in line	Conform	Extremely in line	Extremely in line	Extremely in line	Extremely in line
306	2024/7/5 21:02:17	440 seconds	WeChat	N/A	121	Male	18-20	I'm studying in a specialist	B. Low-intensity and low-tension sports (such as recreational volleyball, table tennis, jogging, Tai Chi, etc.)	D. 31 to 59 minutes	B. Three to five times a week	A. Walking, running B. Travel, outing H. Swimming	D. Very much in line with me	D. Very much in line with me	C. Consistent with my moderate intensity	C. Consistent with my moderate intensity	C. Consistent with my moderate intensity	B. a little bit in line with me.	E. Extremely in line with me	E. Extremely in line with me	D. Very much in line with me	C. Consistent with my moderate intensity	E. Extremely in line with me	E. Extremely in line with me	D. Very much in line with me	E. Extremely in line with me	A. Not at all.	Yes	No	Yes	No	Yes	Yes	Yes	No	Yes	Yes	No	Yes	No	Yes	No	Conform	Not sure	Extremely in line	Extremely in line	Extremely in line	Conform	Not sure
307	2024/7/5 21:02:26	544 seconds	WeChat	N/A	129	Male	18-20	I'm studying in a specialist	C. Moderate intensity and more intense and lasting exercise (such as cycling, running, playing table tennis, etc.)	A. Less than 10 minutes	B. Three to five times a week	D. Ball games G. Exercise equipment activities	D. Very much in line with me	E. Extremely in line with me	A. Not at all.	E. Extremely in line with me	E. Extremely in line with me	B. a little bit in line with me.	D. Very much in line with me	D. Very much in line with me	E. Extremely in line with me	A. Not at all.	E. Extremely in line with me	E. Extremely in line with me	E. Extremely in line with me	E. Extremely in line with me	B. a little bit in line with me.	No	No	Yes	Yes	Yes	Yes	No	Yes	Yes	Yes	Yes	Yes	Yes	No	Yes	Extremely in line	Conform	Conform	Conform	Conform	Extremely in line	Not sure
308	2024/7/5 21:02:34	430 seconds	WeChat	N/A	127	Male	18-20	I'm studying in a specialist	D. High-intensity but not sustained exercise with shortness of breath and a lot of sweating (such as playing badminton, basketball, tennis, football, etc.)	D. 31 to 59 minutes	B. Three to five times a week	A. Walking and running H. Swimming	E. Extremely in line with me	E. Extremely in line with me	B. a little bit in line with me.	D. Very much in line with me	C. Consistent with my moderate intensity	C. Consistent with my moderate intensity	C. Consistent with my moderate intensity	D. Very much in line with me	D. Very much in line with me	A. Not at all.	E. Extremely in line with me	E. Extremely in line with me	C. Consistent with my moderate intensity	D. Very much in line with me	A. Not at all.	Yes	No	No	Yes	Yes	Yes	Yes	No	Yes	No	Yes	Yes	No	Yes	No	Extremely in line	Extremely in line	Extremely in line	Extremely in line	Conform	Extremely in line	Extremely in line
309	2024/7/5 21:02:42	487 seconds	WeChat	N/A	120	Male	21-23	I'm studying in a specialist	B. Low-intensity and low-tension sports (such as recreational volleyball, table tennis, jogging, Tai Chi, etc.)	A. Less than 10 minutes	A. Less than once A month	B. Travel and outing E. Skipping rope H. Swimming	D. Very much in line with me	D. Very much in line with me	B. a little bit in line with me.	E. Extremely in line with me	C. Consistent with my moderate intensity	B. a little bit in line with me.	E. Extremely in line with me	D. Very much in line with me	D. Very much in line with me	C. Consistent with my moderate intensity	E. Extremely in line with me	D. Very much in line with me	D. Very much in line with me	E. Extremely in line with me	B. a little bit in line with me.	Yes	Yes	No	No	Yes	Yes	Yes	Yes	Yes	Yes	Yes	Yes	Yes	Yes	Yes	Conform	Extremely in line	Conform	Extremely in line	Not sure	Conform	Not sure
310	2024/7/5 21:02:49	429 seconds	WeChat	N/A	132	Male	21-23	Undergraduate study	D. High-intensity but not sustained exercise with shortness of breath and a lot of sweating (such as playing badminton, basketball, tennis, football, etc.)	E. More than 60 minutes	B. Three to five times a week	A. Walking and running C. Sports dance	C. Consistent with my moderate intensity	E. Extremely in line with me	B. a little bit in line with me.	C. Consistent with my moderate intensity	D. Very much in line with me	A. Not at all.	E. Extremely in line with me	D. Very much in line with me	D. Very much in line with me	B. a little bit in line with me.	E. Extremely in line with me	E. Extremely in line with me	C. Consistent with my moderate intensity	E. Extremely in line with me	A. Not at all.	Yes	No	Yes	Yes	Yes	Yes	Yes	Yes	Yes	Yes	No	Yes	No	Yes	Yes	Conform	Conform	Extremely in line	Conform	Conform	Conform	Extremely in line
311	2024/7/5 21:02:58	466 seconds	WeChat	N/A	119	Female	18-20	I'm studying in a specialist	C. Moderate intensity and more intense and lasting exercise (such as cycling, running, playing table tennis, etc.)	B. 11 to 20 minutes	B. Three to five times a week	B. Travel, outings H. Swimming	E. Extremely in line with me	D. Very much in line with me	B. a little bit in line with me.	D. Very much in line with me	D. Very much in line with me	C. Consistent with my moderate intensity	C. Consistent with my moderate intensity	D. Very much in line with me	D. Very much in line with me	A. Not at all.	D. Very much in line with me	E. Extremely in line with me	E. Extremely in line with me	E. Extremely in line with me	A. Not at all.	Yes	Yes	No	No	No	No	No	Yes	Yes	Yes	No	Yes	Yes	Yes	Yes	Conform	Not sure	Extremely in line	Conform	Conform	Conform	Conform
312	2024/7/5 21:03:19	438 seconds	WeChat	N/A	125	Male	18-20	I'm studying in a specialist	B. Low-intensity and low-tension sports (such as recreational volleyball, table tennis, jogging, Tai Chi, etc.)	B. 11 to 20 minutes	B. Three to five times a week	A. Walking and running D. Ball games G. Fitness equipment activities	D. Very much in line with me	D. Very much in line with me	B. a little bit in line with me.	D. Very much in line with me	E. Extremely in line with me	A. Not at all.	D. Very much in line with me	C. Consistent with my moderate intensity	E. Extremely in line with me	B. a little bit in line with me.	E. Extremely in line with me	E. Extremely in line with me	D. Very much in line with me	D. Very much in line with me	A. Not at all.	No	No	Yes	Yes	No	Yes	No	No	Yes	No	Yes	Yes	No	No	No	Extremely in line	Extremely in line	Extremely in line	Conform	Conform	Extremely in line	Extremely in line
313	2024/7/5 21:03:30	514 seconds	WeChat	N/A	124	Male	21-23	Undergraduate study	B. Low-intensity and low-tension sports (such as recreational volleyball, table tennis, jogging, Tai Chi, etc.)	D. 31 to 59 minutes	B. Three to five times a week	B. Travel and outing E. Rope skipping	E. Extremely in line with me	E. Extremely in line with me	B. a little bit in line with me.	D. Very much in line with me	E. Extremely in line with me	B. a little bit in line with me.	E. Extremely in line with me	C. Consistent with my moderate intensity	E. Extremely in line with me	B. a little bit in line with me.	C. Consistent with my moderate intensity	E. Extremely in line with me	D. Very much in line with me	E. Extremely in line with me	C. Consistent with my moderate intensity	Yes	No	Yes	Yes	No	Yes	Yes	Yes	Yes	No	Yes	Yes	Yes	No	Yes	Conform	Conform	Conform	Conform	Not sure	Extremely in line	Conform
314	2024/7/5 21:03:43	418 seconds	WeChat	N/A	123	Male	18-20	I'm studying in a specialist	C. Moderate intensity and more intense and lasting exercise (such as cycling, running, playing table tennis, etc.)	B. 11 to 20 minutes	C. Two to three times a month	A. Walking, running B. Travel, outing H. Swimming	C. Consistent with my moderate intensity	E. Extremely in line with me	A. Not at all.	D. Very much in line with me	D. Very much in line with me	B. a little bit in line with me.	E. Extremely in line with me	D. Very much in line with me	D. Very much in line with me	B. a little bit in line with me.	C. Consistent with my moderate intensity	D. Very much in line with me	E. Extremely in line with me	D. Very much in line with me	A. Not at all.	Yes	Yes	Yes	No	No	Yes	Yes	No	Yes	No	Yes	No	Yes	Yes	Yes	Conform	Extremely in line	Extremely in line	Conform	Conform	Conform	Conform
315	2024/7/5 21:03:59	412 seconds	WeChat	N/A	121	Female	18-20	Undergraduate study	B. Low-intensity and low-tension sports (such as recreational volleyball, table tennis, jogging, Tai Chi, etc.)	A. Less than 10 minutes	A. Less than once A month	B. Travel and outing C. Sports dance E. Skipping rope	C. Consistent with my moderate intensity	C. Consistent with my moderate intensity	A. Not at all.	E. Extremely in line with me	D. Very much in line with me	A. Not at all.	E. Extremely in line with me	D. Very much in line with me	E. Extremely in line with me	B. a little bit in line with me.	D. Very much in line with me	E. Extremely in line with me	E. Extremely in line with me	E. Extremely in line with me	C. Consistent with my moderate intensity	No	Yes	No	Yes	Yes	Yes	No	Yes	Yes	Yes	Yes	Yes	Yes	No	Yes	Conform	Conform	Conform	Extremely in line	Extremely in line	Conform	Conform
316	2024/7/5 21:04:10	481 seconds	WeChat	N/A	118	Male	21-23	Undergraduate study	A. Light exercise (such as walking, doing radio gymnastics, playing gateball, etc.)	B. 11 to 20 minutes	A. Less than once A month	A. Walking and running D. Ball games	E. Extremely in line with me	D. Very much in line with me	A. Not at all.	D. Very much in line with me	D. Very much in line with me	B. a little bit in line with me.	D. Very much in line with me	D. Very much in line with me	E. Extremely in line with me	B. a little bit in line with me.	D. Very much in line with me	D. Very much in line with me	E. Extremely in line with me	E. Extremely in line with me	B. a little bit in line with me.	Yes	No	No	Yes	Yes	No	Yes	No	Yes	Yes	No	Yes	No	Yes	No	Extremely in line	Conform	Conform	Extremely in line	Conform	Not sure	Not sure
317	2024/7/5 21:04:18	505 seconds	WeChat	N/A	137	Male	18-20	I'm studying in a specialist	D. High-intensity but not sustained exercise with shortness of breath and a lot of sweating (such as playing badminton, basketball, tennis, football, etc.)	E. More than 60 minutes	C. Two to three times a month	F. Tai Chi, science of health preserving G. Exercise equipment activities	E. Extremely in line with me	E. Extremely in line with me	A. Not at all.	D. Very much in line with me	E. Extremely in line with me	A. Not at all.	D. Very much in line with me	D. Very much in line with me	E. Extremely in line with me	A. Not at all.	E. Extremely in line with me	E. Extremely in line with me	E. Extremely in line with me	E. Extremely in line with me	A. Not at all.	No	Yes	Yes	Yes	Yes	No	Yes	Yes	Yes	Yes	Yes	Yes	Yes	Yes	Yes	Conform	Not sure	Extremely in line	Conform	Conform	Extremely in line	Conform
318	2024/7/5 21:04:26	543 seconds	WeChat	N/A	126	Female	21-23	Undergraduate study	D. High-intensity but not sustained exercise with shortness of breath and a lot of sweating (such as playing badminton, basketball, tennis, football, etc.)	D. 31 to 59 minutes	B. Three to five times a week	A. Walking, running B. Travel, outing C. Sports dance	C. Consistent with my moderate intensity	D. Very much in line with me	A. Not at all.	D. Very much in line with me	D. Very much in line with me	A. Not at all.	D. Very much in line with me	C. Consistent with my moderate intensity	E. Extremely in line with me	B. a little bit in line with me.	E. Extremely in line with me	D. Very much in line with me	D. Very much in line with me	E. Extremely in line with me	A. Not at all.	Yes	Yes	Yes	Yes	No	No	Yes	Yes	Yes	Yes	Yes	Yes	Yes	Yes	Yes	Conform	Extremely in line	Not sure	Extremely in line	Conform	Not sure	Conform
319	2024/7/5 21:04:35	399 seconds	WeChat	N/A	129	Male	18-20	I'm studying in a specialist	B. Low-intensity and low-tension sports (such as recreational volleyball, table tennis, jogging, Tai Chi, etc.)	D. 31 to 59 minutes	D. Approximately once a day	B. Tourism, outings F. Tai Chi, science of health preserving.	E. Extremely in line with me	D. Very much in line with me	B. a little bit in line with me.	D. Very much in line with me	E. Extremely in line with me	A. Not at all.	D. Very much in line with me	D. Very much in line with me	D. Very much in line with me	B. a little bit in line with me.	E. Extremely in line with me	E. Extremely in line with me	E. Extremely in line with me	D. Very much in line with me	B. a little bit in line with me.	Yes	Yes	Yes	No	Yes	No	Yes	Yes	Yes	No	Yes	Yes	Yes	No	No	Conform	Conform	Not sure	Conform	Conform	Extremely in line	Extremely in line
320	2024/7/5 21:04:41	547 seconds	WeChat	N/A	128	Female	18-20	I'm studying in a specialist	C. Moderate intensity and more intense and lasting exercise (such as cycling, running, playing table tennis, etc.)	D. 31 to 59 minutes	B. Three to five times a week	A. Walking and running B. Travel and outing E. Skipping rope	E. Extremely in line with me	E. Extremely in line with me	B. a little bit in line with me.	E. Extremely in line with me	C. Consistent with my moderate intensity	A. Not at all.	D. Very much in line with me	D. Very much in line with me	D. Very much in line with me	A. Not at all.	E. Extremely in line with me	C. Consistent with my moderate intensity	C. Consistent with my moderate intensity	E. Extremely in line with me	A. Not at all.	Yes	Yes	Yes	No	No	No	Yes	Yes	Yes	Yes	Yes	Yes	Yes	Yes	Yes	Conform	Conform	Conform	Conform	Extremely in line	Conform	Conform
321	2024/7/5 21:04:47	512 seconds	WeChat	N/A	120	Male	18-20	Undergraduate study	B. Low-intensity and low-tension sports (such as recreational volleyball, table tennis, jogging, Tai Chi, etc.)	C. 21 to 30 minutes	D. Approximately once a day	B. Travel and outing E. Skipping rope H. Swimming	C. Consistent with my moderate intensity	D. Very much in line with me	C. Consistent with my moderate intensity	D. Very much in line with me	C. Consistent with my moderate intensity	C. Consistent with my moderate intensity	D. Very much in line with me	E. Extremely in line with me	E. Extremely in line with me	A. Not at all.	C. Consistent with my moderate intensity	E. Extremely in line with me	C. Consistent with my moderate intensity	D. Very much in line with me	B. a little bit in line with me.	No	No	Yes	No	Yes	No	Yes	No	Yes	Yes	Yes	Yes	Yes	No	No	Conform	Extremely in line	Extremely in line	Conform	Not sure	Extremely in line	Extremely in line
322	2024/7/5 21:04:56	477 seconds	WeChat	N/A	127	Female	18-20	Undergraduate study	D. High-intensity but not sustained exercise with shortness of breath and a lot of sweating (such as playing badminton, basketball, tennis, football, etc.)	B. 11 to 20 minutes	C. Two to three times a month	A. Walking and running D. Ball games E. Skipping rope	E. Extremely in line with me	E. Extremely in line with me	B. a little bit in line with me.	D. Very much in line with me	C. Consistent with my moderate intensity	A. Not at all.	C. Consistent with my moderate intensity	D. Very much in line with me	E. Extremely in line with me	A. Not at all.	D. Very much in line with me	E. Extremely in line with me	D. Very much in line with me	E. Extremely in line with me	B. a little bit in line with me.	No	Yes	Yes	Yes	Yes	Yes	No	No	Yes	No	No	No	Yes	No	Yes	Extremely in line	Conform	Conform	Extremely in line	Conform	Conform	Extremely in line
323	2024/7/5 21:05:04	505 seconds	WeChat	N/A	130	Male	18-20	I'm studying in a specialist	B. Low-intensity and low-tension sports (such as recreational volleyball, table tennis, jogging, Tai Chi, etc.)	C. 21 to 30 minutes	E. 1-2 times per week	A. Walking and running D. Ball games H. Swimming	E. Extremely in line with me	E. Extremely in line with me	A. Not at all.	E. Extremely in line with me	D. Very much in line with me	A. Not at all.	D. Very much in line with me	D. Very much in line with me	D. Very much in line with me	A. Not at all.	D. Very much in line with me	E. Extremely in line with me	E. Extremely in line with me	C. Consistent with my moderate intensity	B. a little bit in line with me.	Yes	Yes	Yes	Yes	Yes	Yes	Yes	No	Yes	No	Yes	Yes	Yes	Yes	No	Extremely in line	Conform	Conform	Not sure	Conform	Not sure	Conform
324	2024/7/5 21:47:49	419 seconds	WeChat	N/A	79	Male	21-23	Undergraduate study	B. Low-intensity and low-tension sports (such as recreational volleyball, table tennis, jogging, Tai Chi, etc.)	E. More than 60 minutes	A. Less than once A month	A. Walking and running E. Skipping rope	C. Consistent with my moderate intensity	B. a little bit in line with me.	D. Very much in line with me	A. Not at all.	B. a little bit in line with me.	E. Extremely in line with me	A. Not at all.	C. Consistent with my moderate intensity	B. a little bit in line with me.	C. Consistent with my moderate intensity	D. Very much in line with me	C. Consistent with my moderate intensity	C. Consistent with my moderate intensity	B. a little bit in line with me.	A. Not at all.	No	Yes	No	No	Yes	Yes	Yes	Yes	Yes	Yes	No	Yes	Yes	Yes	No	Extremely inconsistent	Extremely inconsistent	Not sure	Extremely inconsistent	Extremely inconsistent	Does not match	Extremely in line
325	2024/7/5 21:48:16	488 seconds	WeChat	N/A	75	Male	21-23	Undergraduate study	C. Moderate intensity and more intense and lasting exercise (such as cycling, running, playing table tennis, etc.)	D. 31 to 59 minutes	C. Two to three times a month	B. Tourism and outing D. Ball games	A. Not at all.	A. Not at all.	C. Consistent with my moderate intensity	A. Not at all.	A. Not at all.	C. Consistent with my moderate intensity	D. Very much in line with me	C. Consistent with my moderate intensity	A. Not at all.	A. Not at all.	A. Not at all.	B. a little bit in line with me.	B. a little bit in line with me.	B. a little bit in line with me.	D. Very much in line with me	Yes	Yes	Yes	No	No	Yes	No	No	Yes	No	Yes	No	Yes	No	Yes	Extremely inconsistent	Extremely inconsistent	Extremely in line	Extremely inconsistent	Does not match	Not sure	Not sure
326	2024/7/5 21:48:27	407 seconds	WeChat	N/A	68	Male	21-23	Undergraduate study	A. Light exercise (such as walking, doing radio gymnastics, playing gateball, etc.)	A. Less than 10 minutes	B. Three to five times a week	A. Walking and running E. Skipping rope	C. Consistent with my moderate intensity	A. Not at all.	C. Consistent with my moderate intensity	B. a little bit in line with me.	C. Consistent with my moderate intensity	E. Extremely in line with me	D. Very much in line with me	B. a little bit in line with me.	A. Not at all.	D. Very much in line with me	D. Very much in line with me	B. a little bit in line with me.	A. Not at all.	A. Not at all.	E. Extremely in line with me	Yes	Yes	No	Yes	Yes	Yes	Yes	Yes	Yes	Yes	Yes	No	No	Yes	Yes	Not sure	Does not match	Does not match	Does not match	Does not match	Does not match	Extremely inconsistent
327	2024/7/5 21:48:37	510 seconds	WeChat	N/A	72	Female	24-26	Undergraduate study	B. Low-intensity and low-tension sports (such as recreational volleyball, table tennis, jogging, Tai Chi, etc.)	C. 21 to 30 minutes	C. 2 to 3 times a month	A. Walking and running D. Ball games	A. Not at all.	A. Not at all.	E. Extremely in line with me	B. a little bit in line with me.	A. Not at all.	B. a little bit in line with me.	C. Consistent with my moderate intensity	C. Consistent with my moderate intensity	C. Consistent with my moderate intensity	A. Not at all.	D. Very much in line with me	A. Not at all.	C. Consistent with my moderate intensity	B. a little bit in line with me.	C. Consistent with my moderate intensity	No	Yes	Yes	No	Yes	Yes	Yes	Yes	Yes	Yes	No	Yes	Yes	No	No	Extremely inconsistent	Not sure	Extremely inconsistent	Not sure	Not sure	Extremely inconsistent	Extremely inconsistent
328	2024/7/5 21:49:23	508 seconds	WeChat	N/A	81	Male	21-23	Undergraduate study	A. Light exercise (such as walking, doing radio gymnastics, playing gateball, etc.)	D. 31 to 59 minutes	D. Approximately once a day	A. Walking and running E. Skipping rope	A. Not at all.	B. a little bit in line with me.	C. Consistent with my moderate intensity	E. Extremely in line with me	D. Very much in line with me	A. Not at all.	B. a little bit in line with me.	C. Consistent with my moderate intensity	C. Consistent with my moderate intensity	C. Consistent with my moderate intensity	C. Consistent with my moderate intensity	C. Consistent with my moderate intensity	C. Consistent with my moderate intensity	C. Consistent with my moderate intensity	D. Very much in line with me	Yes	No	No	No	Yes	Yes	Yes	No	Yes	No	Yes	No	Yes	No	Yes	Not sure	Not sure	Extremely inconsistent	Extremely inconsistent	Does not match	Conform	Extremely inconsistent
329	2024/7/5 21:49:34	551 seconds	WeChat	N/A	70	Female	21-23	Undergraduate study	D. High-intensity but not sustained exercise with shortness of breath and a lot of sweating (such as playing badminton, basketball, tennis, football, etc.)	D. 31 to 59 minutes	A. Less than once A month	A. Walking and running H. Swimming	D. Very much in line with me	A. Not at all.	E. Extremely in line with me	C. Consistent with my moderate intensity	A. Not at all.	E. Extremely in line with me	C. Consistent with my moderate intensity	C. Consistent with my moderate intensity	D. Very much in line with me	D. Very much in line with me	D. Very much in line with me	B. a little bit in line with me.	A. Not at all.	B. a little bit in line with me.	E. Extremely in line with me	Yes	Yes	Yes	Yes	Yes	Yes	Yes	No	No	No	Yes	No	No	Yes	Yes	Not sure	Does not match	Extremely inconsistent	Does not match	Extremely inconsistent	Does not match	Does not match
330	2024/7/5 21:49:42	489 seconds	WeChat	N/A	87	Male	21-23	I'm studying in a specialist	E. High-intensity and sustained exercise with shortness of breath and a lot of sweating (such as running, aerobics sets, swimming, etc.)	A. Less than 10 minutes	D. Approximately once a day	B. Travel, outings H. Swimming	D. Very much in line with me	B. a little bit in line with me.	D. Very much in line with me	B. a little bit in line with me.	C. Consistent with my moderate intensity	C. Consistent with my moderate intensity	D. Very much in line with me	E. Extremely in line with me	C. Consistent with my moderate intensity	D. Very much in line with me	A. Not at all.	A. Not at all.	A. Not at all.	D. Very much in line with me	E. Extremely in line with me	Yes	Yes	No	No	Yes	Yes	No	Yes	Yes	Yes	Yes	Yes	No	No	Yes	Does not match	Not sure	Not sure	Does not match	Does not match	Does not match	Extremely in line
331	2024/7/5 21:49:52	431 seconds	WeChat	N/A	79	Male	21-23	Undergraduate study	E. High-intensity and sustained exercise with shortness of breath and a lot of sweating (such as running, aerobics sets, swimming, etc.)	A. Less than 10 minutes	D. Approximately once a day	B. Tourism and outings D. Ball games F. Tai Chi and science of health preserving.	C. Consistent with my moderate intensity	C. Consistent with my moderate intensity	D. Very much in line with me	C. Consistent with my moderate intensity	C. Consistent with my moderate intensity	D. Very much in line with me	A. Not at all.	A. Not at all.	B. a little bit in line with me.	D. Very much in line with me	A. Not at all.	B. a little bit in line with me.	E. Extremely in line with me	A. Not at all.	E. Extremely in line with me	Yes	Yes	Yes	Yes	Yes	Yes	Yes	Yes	Yes	Yes	No	Yes	Yes	Yes	Yes	Extremely inconsistent	Not sure	Not sure	Not sure	Extremely inconsistent	Not sure	Does not match
332	2024/7/5 21:50:03	550 seconds	WeChat	N/A	73	Male	24-26	Undergraduate study	B. Low-intensity and low-tension sports (such as recreational volleyball, table tennis, jogging, Tai Chi, etc.)	B. 11 to 20 minutes	B. Three to five times a week	A. Walking and running C. Sports dance D. Ball games	B. a little bit in line with me.	B. a little bit in line with me.	E. Extremely in line with me	B. a little bit in line with me.	B. a little bit in line with me.	E. Extremely in line with me	B. a little bit in line with me.	E. Extremely in line with me	B. a little bit in line with me.	A. Not at all.	C. Consistent with my moderate intensity	D. Very much in line with me	B. a little bit in line with me.	A. Not at all.	E. Extremely in line with me	Yes	Yes	Yes	No	Yes	Yes	No	Yes	Yes	Yes	Yes	No	No	Yes	Yes	Does not match	Extremely inconsistent	Does not match	Extremely in line	Extremely inconsistent	Does not match	Not sure
333	2024/7/5 21:50:10	472 seconds	WeChat	N/A	74	Male	21-23	Undergraduate study	D. High-intensity but not sustained exercise with shortness of breath and a lot of sweating (such as playing badminton, basketball, tennis, football, etc.)	B. 11 to 20 minutes	D. Approximately once a day	A. Walking and running B. Travel and outing	C. Consistent with my moderate intensity	B. a little bit in line with me.	A. Not at all.	A. Not at all.	D. Very much in line with me	D. Very much in line with me	B. a little bit in line with me.	B. a little bit in line with me.	C. Consistent with my moderate intensity	C. Consistent with my moderate intensity	A. Not at all.	C. Consistent with my moderate intensity	B. a little bit in line with me.	A. Not at all.	D. Very much in line with me	Yes	No	Yes	No	No	Yes	Yes	Yes	Yes	Yes	Yes	Yes	Yes	Yes	Yes	Extremely inconsistent	Not sure	Extremely inconsistent	Not sure	Extremely inconsistent	Extremely inconsistent	Not sure
334	2024/7/5 21:50:33	455 seconds	WeChat	N/A	71	Female	21-23	I'm studying in a specialist	C. Moderate intensity and more intense and lasting exercise (such as cycling, running, playing table tennis, etc.)	A. Less than 10 minutes	C. Two to three times a month	A. Walking, running B. Travel, outing G. Fitness equipment activities	E. Extremely in line with me	A. Not at all.	C. Consistent with my moderate intensity	A. Not at all.	C. Consistent with my moderate intensity	D. Very much in line with me	C. Consistent with my moderate intensity	B. a little bit in line with me.	B. a little bit in line with me.	E. Extremely in line with me	B. a little bit in line with me.	B. a little bit in line with me.	A. Not at all.	A. Not at all.	C. Consistent with my moderate intensity	Yes	Yes	Yes	Yes	Yes	Yes	Yes	Yes	Yes	Yes	No	No	Yes	No	Yes	Not sure	Does not match	Does not match	Extremely inconsistent	Does not match	Does not match	Does not match
335	2024/7/5 21:50:44	425 seconds	WeChat	N/A	70	Male	24-26	Undergraduate study	C. Moderate intensity and more intense and lasting exercise (such as cycling, running, playing table tennis, etc.)	E. More than 60 minutes	C. Two to three times a month	A. Walking and running C. Sports dance E. Skipping rope	C. Consistent with my moderate intensity	B. a little bit in line with me.	E. Extremely in line with me	C. Consistent with my moderate intensity	A. Not at all.	D. Very much in line with me	D. Very much in line with me	C. Consistent with my moderate intensity	B. a little bit in line with me.	E. Extremely in line with me	B. a little bit in line with me.	A. Not at all.	A. Not at all.	B. a little bit in line with me.	D. Very much in line with me	Yes	Yes	No	No	No	Yes	No	Yes	Yes	Yes	No	No	Yes	Yes	No	Does not match	Extremely inconsistent	Does not match	Extremely inconsistent	Extremely inconsistent	Not sure	Conform
336	2024/7/5 21:50:55	509 seconds	WeChat	N/A	79	Male	21-23	I'm studying in a specialist	B. Low-intensity and low-tension sports (such as recreational volleyball, table tennis, jogging, Tai Chi, etc.)	E. More than 60 minutes	A. Less than once A month	B. Tourism and outing D. Ball games I. Others	C. Consistent with my moderate intensity	A. Not at all.	E. Extremely in line with me	E. Extremely in line with me	B. a little bit in line with me.	B. a little bit in line with me.	A. Not at all.	E. Extremely in line with me	B. a little bit in line with me.	E. Extremely in line with me	A. Not at all.	C. Consistent with my moderate intensity	A. Not at all.	C. Consistent with my moderate intensity	E. Extremely in line with me	Yes	Yes	Yes	Yes	No	Yes	No	Yes	Yes	Yes	Yes	No	Yes	Yes	Yes	Extremely inconsistent	Extremely inconsistent	Extremely in line	Not sure	Does not match	Extremely inconsistent	Not sure
337	2024/7/5 21:51:03	474 seconds	WeChat	N/A	80	Male	21-23	Undergraduate study	C. Moderate intensity and more intense and lasting exercise (such as cycling, running, playing table tennis, etc.)	C. 21 to 30 minutes	D. Approximately once a day	E. Rope skipping F. Tai Chi, science of health preserving G. Exercise equipment	A. Not at all.	E. Extremely in line with me	E. Extremely in line with me	A. Not at all.	B. a little bit in line with me.	D. Very much in line with me	E. Extremely in line with me	E. Extremely in line with me	E. Extremely in line with me	D. Very much in line with me	D. Very much in line with me	A. Not at all.	B. a little bit in line with me.	A. Not at all.	D. Very much in line with me	Yes	Yes	Yes	Yes	No	Yes	No	Yes	No	Yes	Yes	Yes	Yes	Yes	Yes	Extremely inconsistent	Does not match	Not sure	Extremely inconsistent	Does not match	Does not match	Does not match
338	2024/7/5 21:51:20	460 seconds	WeChat	N/A	75	Male	21-23	Undergraduate study	A. Light exercise (such as walking, doing radio gymnastics, playing gateball, etc.)	D. 31 to 59 minutes	B. Three to five times a week	B. Travel and outing E. Rope skipping	B. a little bit in line with me.	C. Consistent with my moderate intensity	E. Extremely in line with me	A. Not at all.	B. a little bit in line with me.	D. Very much in line with me	A. Not at all.	E. Extremely in line with me	A. Not at all.	E. Extremely in line with me	D. Very much in line with me	B. a little bit in line with me.	C. Consistent with my moderate intensity	A. Not at all.	C. Consistent with my moderate intensity	Yes	No	No	Yes	Yes	Yes	Yes	Yes	Yes	Yes	Yes	Yes	Yes	No	Yes	Extremely in line	Not sure	Extremely inconsistent	Extremely inconsistent	Conform	Not sure	Extremely inconsistent
339	2024/7/5 21:51:31	504 seconds	WeChat	N/A	82	Male	21-23	Undergraduate study	B. Low-intensity and low-tension sports (such as recreational volleyball, table tennis, jogging, Tai Chi, etc.)	D. 31 to 59 minutes	B. Three to five times a week	B. Tourism and outings D. Ball games F. Tai Chi and science of health preserving.	A. Not at all.	A. Not at all.	C. Consistent with my moderate intensity	B. a little bit in line with me.	C. Consistent with my moderate intensity	D. Very much in line with me	E. Extremely in line with me	E. Extremely in line with me	B. a little bit in line with me.	E. Extremely in line with me	A. Not at all.	A. Not at all.	B. a little bit in line with me.	A. Not at all.	D. Very much in line with me	Yes	Yes	No	Yes	Yes	No	No	No	No	Yes	Yes	Yes	Yes	Yes	Yes	Not sure	Not sure	Not sure	Extremely in line	Conform	Conform	Extremely inconsistent
340	2024/7/5 21:51:38	508 seconds	WeChat	N/A	134	Male	21-23	Undergraduate study	C. Moderate intensity and more intense and lasting exercise (such as cycling, running, playing table tennis, etc.)	D. 31 to 59 minutes	C. Two to three times a month	D. Ball games E. Rope skipping	E. Extremely in line with me	D. Very much in line with me	C. Consistent with my moderate intensity	E. Extremely in line with me	E. Extremely in line with me	A. Not at all.	E. Extremely in line with me	D. Very much in line with me	D. Very much in line with me	B. a little bit in line with me.	E. Extremely in line with me	C. Consistent with my moderate intensity	E. Extremely in line with me	E. Extremely in line with me	A. Not at all.	Yes	Yes	No	Yes	No	Yes	Yes	Yes	Yes	Yes	No	Yes	Yes	Yes	Yes	Extremely in line	Conform	Extremely in line	Conform	Not sure	Extremely in line	Extremely in line
341	2024/7/5 21:51:48	394 seconds	WeChat	N/A	126	Female	21-23	Undergraduate study	D. High-intensity but not sustained exercise with shortness of breath and a lot of sweating (such as playing badminton, basketball, tennis, football, etc.)	D. 31 to 59 minutes	C. Two to three times a month	B. Travel and outing E. Rope skipping	D. Very much in line with me	D. Very much in line with me	C. Consistent with my moderate intensity	E. Extremely in line with me	D. Very much in line with me	A. Not at all.	C. Consistent with my moderate intensity	C. Consistent with my moderate intensity	C. Consistent with my moderate intensity	A. Not at all.	E. Extremely in line with me	E. Extremely in line with me	C. Consistent with my moderate intensity	D. Very much in line with me	B. a little bit in line with me.	Yes	No	Yes	No	Yes	Yes	No	No	Yes	No	Yes	Yes	Yes	Yes	Yes	Conform	Conform	Extremely in line	Extremely in line	Extremely in line	Conform	Conform
342	2024/7/5 21:52:09	503 seconds	WeChat	N/A	130	Male	21-23	Undergraduate study	D. High-intensity but not sustained exercise with shortness of breath and a lot of sweating (such as playing badminton, basketball, tennis, football, etc.)	C. 21 to 30 minutes	D. Approximately once a day	B. Tourism, outings F. Tai Chi, science of health preserving.	E. Extremely in line with me	E. Extremely in line with me	C. Consistent with my moderate intensity	E. Extremely in line with me	E. Extremely in line with me	A. Not at all.	D. Very much in line with me	D. Very much in line with me	D. Very much in line with me	A. Not at all.	E. Extremely in line with me	D. Very much in line with me	E. Extremely in line with me	D. Very much in line with me	A. Not at all.	No	No	Yes	No	No	Yes	No	Yes	Yes	Yes	Yes	No	Yes	No	Yes	Extremely in line	Not sure	Conform	Conform	Extremely in line	Extremely in line	Conform
343	2024/7/5 21:52:45	455 seconds	WeChat	N/A	122	Male	21-23	Undergraduate study	A. Light exercise (such as walking, doing radio gymnastics, playing gateball, etc.)	C. 21 to 30 minutes	B. Three to five times a week	A. Walking and running B. Travel and outing F. Tai Chi and science of health preserving.	E. Extremely in line with me	E. Extremely in line with me	A. Not at all.	D. Very much in line with me	D. Very much in line with me	B. a little bit in line with me.	E. Extremely in line with me	C. Consistent with my moderate intensity	E. Extremely in line with me	A. Not at all.	D. Very much in line with me	D. Very much in line with me	C. Consistent with my moderate intensity	E. Extremely in line with me	A. Not at all.	Yes	No	No	No	No	Yes	No	No	Yes	Yes	Yes	Yes	Yes	No	Yes	Extremely in line	Extremely in line	Conform	Extremely in line	Not sure	Conform	Conform
344	2024/7/5 21:52:49	436 seconds	WeChat	N/A	122	Male	21-23	Undergraduate study	A. Light exercise (such as walking, doing radio gymnastics, playing gateball, etc.)	C. 21 to 30 minutes	B. Three to five times a week	A. Walking and running B. Travel and outing F. Tai Chi and science of health preserving.	E. Extremely in line with me	E. Extremely in line with me	A. Not at all.	D. Very much in line with me	D. Very much in line with me	B. a little bit in line with me.	E. Extremely in line with me	C. Consistent with my moderate intensity	E. Extremely in line with me	A. Not at all.	D. Very much in line with me	D. Very much in line with me	C. Consistent with my moderate intensity	E. Extremely in line with me	A. Not at all.	Yes	No	No	No	No	Yes	No	No	Yes	Yes	Yes	Yes	Yes	No	Yes	Extremely in line	Extremely in line	Conform	Extremely in line	Not sure	Conform	Conform
345	2024/7/5 21:53:00	389 seconds	WeChat	N/A	126	Male	21-23	Undergraduate study	D. High-intensity but not sustained exercise with shortness of breath and a lot of sweating (such as playing badminton, basketball, tennis, football, etc.)	C. 21 to 30 minutes	A. Less than once A month	F. Tai Chi, science of health preserving G. Exercise equipment activities I. Others	E. Extremely in line with me	E. Extremely in line with me	B. a little bit in line with me.	D. Very much in line with me	D. Very much in line with me	A. Not at all.	D. Very much in line with me	D. Very much in line with me	D. Very much in line with me	B. a little bit in line with me.	D. Very much in line with me	E. Extremely in line with me	E. Extremely in line with me	E. Extremely in line with me	A. Not at all.	No	Yes	Yes	No	No	Yes	Yes	No	Yes	Yes	No	Yes	Yes	No	Yes	Conform	Conform	Conform	Conform	Conform	Conform	Conform
346	2024/7/5 21:53:17	449 seconds	WeChat	N/A	131	Male	24-26	Undergraduate study	C. Moderate intensity and more intense and lasting exercise (such as cycling, running, playing table tennis, etc.)	D. 31 to 59 minutes	E. 1-2 times per week	D. Ball games E. Rope skipping	E. Extremely in line with me	D. Very much in line with me	B. a little bit in line with me.	D. Very much in line with me	D. Very much in line with me	C. Consistent with my moderate intensity	D. Very much in line with me	E. Extremely in line with me	D. Very much in line with me	A. Not at all.	C. Consistent with my moderate intensity	D. Very much in line with me	E. Extremely in line with me	E. Extremely in line with me	A. Not at all.	Yes	Yes	Yes	No	Yes	Yes	Yes	Yes	Yes	No	Yes	No	Yes	Yes	Yes	Not sure	Conform	Extremely in line	Conform	Extremely in line	Conform	Conform
347	2024/7/5 21:53:27	546 seconds	WeChat	N/A	129	Female	21-23	Undergraduate study	C. Moderate intensity and more intense and lasting exercise (such as cycling, running, playing table tennis, etc.)	E. More than 60 minutes	C. 2 to 3 times a month	B. Travel and outing D. Ball games E. Skipping rope	D. Very much in line with me	D. Very much in line with me	B. a little bit in line with me.	D. Very much in line with me	E. Extremely in line with me	A. Not at all.	E. Extremely in line with me	D. Very much in line with me	D. Very much in line with me	A. Not at all.	E. Extremely in line with me	E. Extremely in line with me	D. Very much in line with me	E. Extremely in line with me	B. a little bit in line with me.	Yes	Yes	No	No	Yes	No	Yes	No	No	Yes	No	Yes	Yes	Yes	Yes	Extremely in line	Conform	Extremely in line	Conform	Extremely in line	Conform	Not sure
348	2024/7/5 21:53:36	429 seconds	WeChat	N/A	122	Male	21-23	Undergraduate study	B. Low-intensity and low-tension sports (such as recreational volleyball, table tennis, jogging, Tai Chi, etc.)	E. More than 60 minutes	C. 2 to 3 times a month	A. Walking and running D. Ball games E. Skipping rope	D. Very much in line with me	E. Extremely in line with me	B. a little bit in line with me.	E. Extremely in line with me	D. Very much in line with me	C. Consistent with my moderate intensity	E. Extremely in line with me	C. Consistent with my moderate intensity	E. Extremely in line with me	A. Not at all.	E. Extremely in line with me	D. Very much in line with me	C. Consistent with my moderate intensity	C. Consistent with my moderate intensity	C. Consistent with my moderate intensity	Yes	Yes	Yes	No	Yes	Yes	Yes	No	Yes	Yes	Yes	No	Yes	Yes	Yes	Conform	Conform	Not sure	Conform	Conform	Conform	Extremely in line
349	2024/7/5 21:53:48	476 seconds	WeChat	N/A	129	Female	21-23	Undergraduate study	C. Moderate intensity and more intense and lasting exercise (such as cycling, running, playing table tennis, etc.)	D. 31 to 59 minutes	A. Less than once A month	A. Walking and running E. Skipping rope H. Swimming	D. Very much in line with me	D. Very much in line with me	B. a little bit in line with me.	D. Very much in line with me	E. Extremely in line with me	B. a little bit in line with me.	D. Very much in line with me	E. Extremely in line with me	D. Very much in line with me	A. Not at all.	D. Very much in line with me	D. Very much in line with me	D. Very much in line with me	E. Extremely in line with me	A. Not at all.	Yes	Yes	Yes	Yes	Yes	Yes	No	Yes	Yes	Yes	Yes	No	Yes	Yes	Yes	Conform	Extremely in line	Conform	Extremely in line	Conform	Conform	Conform
350	2024/7/5 21:54:01	486 seconds	WeChat	N/A	124	Male	21-23	Undergraduate study	D. High-intensity but not sustained exercise with shortness of breath and a lot of sweating (such as playing badminton, basketball, tennis, football, etc.)	A. Less than 10 minutes	B. Three to five times a week	B. Travel, outing D. Ball games H. Swimming	E. Extremely in line with me	E. Extremely in line with me	C. Consistent with my moderate intensity	E. Extremely in line with me	E. Extremely in line with me	C. Consistent with my moderate intensity	E. Extremely in line with me	D. Very much in line with me	E. Extremely in line with me	A. Not at all.	C. Consistent with my moderate intensity	D. Very much in line with me	D. Very much in line with me	E. Extremely in line with me	B. a little bit in line with me.	Yes	Yes	Yes	No	Yes	Yes	Yes	Yes	Yes	No	Yes	No	Yes	Yes	No	Conform	Conform	Not sure	Conform	Conform	Conform	Not sure
351	2024/7/5 21:54:29	386 seconds	WeChat	N/A	117	Female	21-23	Undergraduate study	A. Light exercise (such as walking, doing radio gymnastics, playing gateball, etc.)	B. 11 to 20 minutes	B. Three to five times a week	E. Rope skipping F. Tai Chi and science of health preserving.	C. Consistent with my moderate intensity	D. Very much in line with me	B. a little bit in line with me.	D. Very much in line with me	E. Extremely in line with me	B. a little bit in line with me.	D. Very much in line with me	E. Extremely in line with me	E. Extremely in line with me	A. Not at all.	D. Very much in line with me	E. Extremely in line with me	D. Very much in line with me	C. Consistent with my moderate intensity	B. a little bit in line with me.	Yes	Yes	No	No	No	No	Yes	Yes	Yes	Yes	No	Yes	No	No	Yes	Conform	Not sure	Not sure	Extremely in line	Conform	Extremely in line	Conform
352	2024/7/5 21:54:39	431 seconds	WeChat	N/A	123	Male	21-23	I'm studying in a specialist	B. Low-intensity and low-tension sports (such as recreational volleyball, table tennis, jogging, Tai Chi, etc.)	B. 11 to 20 minutes	B. Three to five times a week	B. Travel, outing E. Rope skipping F. Tai Chi, science of health preserving.	D. Very much in line with me	E. Extremely in line with me	C. Consistent with my moderate intensity	D. Very much in line with me	D. Very much in line with me	C. Consistent with my moderate intensity	D. Very much in line with me	D. Very much in line with me	E. Extremely in line with me	A. Not at all.	C. Consistent with my moderate intensity	E. Extremely in line with me	D. Very much in line with me	E. Extremely in line with me	A. Not at all.	Yes	Yes	No	Yes	Yes	Yes	No	Yes	No	No	Yes	Yes	No	Yes	Yes	Extremely in line	Conform	Conform	Conform	Extremely in line	Not sure	Extremely in line
353	2024/7/5 21:54:47	387 seconds	WeChat	N/A	126	Female	24-26	Undergraduate study	A. Light exercise (such as walking, doing radio gymnastics, playing gateball, etc.)	E. More than 60 minutes	B. Three to five times a week	A. Walking and running E. Skipping rope	E. Extremely in line with me	C. Consistent with my moderate intensity	B. a little bit in line with me.	D. Very much in line with me	D. Very much in line with me	A. Not at all.	D. Very much in line with me	D. Very much in line with me	E. Extremely in line with me	B. a little bit in line with me.	D. Very much in line with me	D. Very much in line with me	E. Extremely in line with me	D. Very much in line with me	B. a little bit in line with me.	Yes	No	Yes	No	Yes	Yes	Yes	No	No	Yes	No	No	Yes	Yes	Yes	Extremely in line	Extremely in line	Conform	Extremely in line	Not sure	Extremely in line	Extremely in line
354	2024/7/5 21:54:57	427 seconds	WeChat	N/A	124	Male	21-23	I'm studying in a specialist	B. Low-intensity and low-tension sports (such as recreational volleyball, table tennis, jogging, Tai Chi, etc.)	E. More than 60 minutes	C. Two to three times a month	A. Walking and running E. Skipping rope	D. Very much in line with me	E. Extremely in line with me	B. a little bit in line with me.	D. Very much in line with me	E. Extremely in line with me	B. a little bit in line with me.	D. Very much in line with me	C. Consistent with my moderate intensity	C. Consistent with my moderate intensity	B. a little bit in line with me.	D. Very much in line with me	D. Very much in line with me	D. Very much in line with me	E. Extremely in line with me	A. Not at all.	No	Yes	No	No	No	Yes	No	Yes	Yes	Yes	Yes	Yes	Yes	Yes	Yes	Conform	Conform	Extremely in line	Not sure	Not sure	Extremely in line	Extremely in line
355	2024/7/5 21:55:05	476 seconds	WeChat	N/A	124	Female	21-23	Undergraduate study	A. Light exercise (such as walking, doing radio gymnastics, playing gateball, etc.)	B. 11 to 20 minutes	D. Approximately once a day	B. Tourism and outings I. Others	E. Extremely in line with me	D. Very much in line with me	B. a little bit in line with me.	E. Extremely in line with me	E. Extremely in line with me	B. a little bit in line with me.	D. Very much in line with me	D. Very much in line with me	E. Extremely in line with me	C. Consistent with my moderate intensity	D. Very much in line with me	E. Extremely in line with me	D. Very much in line with me	D. Very much in line with me	B. a little bit in line with me.	Yes	Yes	Yes	No	Yes	No	Yes	Yes	Yes	Yes	No	Yes	Yes	No	Yes	Conform	Conform	Extremely in line	Conform	Not sure	Extremely in line	Extremely in line
356	2024/7/5 21:55:15	503 seconds	WeChat	N/A	121	Male	21-23	Undergraduate study	B. Low-intensity and low-tension sports (such as recreational volleyball, table tennis, jogging, Tai Chi, etc.)	C. 21 to 30 minutes	A. Less than once A month	A. Walking and running D. Ball games	E. Extremely in line with me	E. Extremely in line with me	B. a little bit in line with me.	D. Very much in line with me	E. Extremely in line with me	C. Consistent with my moderate intensity	D. Very much in line with me	E. Extremely in line with me	E. Extremely in line with me	C. Consistent with my moderate intensity	D. Very much in line with me	D. Very much in line with me	D. Very much in line with me	D. Very much in line with me	B. a little bit in line with me.	Yes	Yes	Yes	No	Yes	Yes	Yes	Yes	Yes	No	Yes	Yes	Yes	No	Yes	Not sure	Conform	Extremely in line	Conform	Extremely in line	Not sure	Extremely in line
357	2024/7/5 21:55:34	519 seconds	WeChat	N/A	134	Female	24-26	Undergraduate study	D. High-intensity but not sustained exercise with shortness of breath and a lot of sweating (such as playing badminton, basketball, tennis, football, etc.)	E. More than 60 minutes	C. Two to three times a month	D. Ball games G. Exercise equipment activities	E. Extremely in line with me	D. Very much in line with me	B. a little bit in line with me.	D. Very much in line with me	E. Extremely in line with me	A. Not at all.	E. Extremely in line with me	D. Very much in line with me	C. Consistent with my moderate intensity	B. a little bit in line with me.	E. Extremely in line with me	C. Consistent with my moderate intensity	E. Extremely in line with me	E. Extremely in line with me	A. Not at all.	Yes	Yes	Yes	Yes	Yes	Yes	Yes	No	Yes	Yes	No	Yes	Yes	Yes	Yes	Conform	Conform	Extremely in line	Not sure	Extremely in line	Conform	Extremely in line
358	2024/7/5 21:55:42	392 seconds	WeChat	N/A	123	Female	21-23	I'm studying in a specialist	C. Moderate intensity and more intense and lasting exercise (such as cycling, running, playing table tennis, etc.)	C. 21 to 30 minutes	B. Three to five times a week	A. Walking and running F. Tai Chi and science of health preserving.	D. Very much in line with me	E. Extremely in line with me	C. Consistent with my moderate intensity	D. Very much in line with me	C. Consistent with my moderate intensity	B. a little bit in line with me.	D. Very much in line with me	E. Extremely in line with me	E. Extremely in line with me	A. Not at all.	C. Consistent with my moderate intensity	E. Extremely in line with me	D. Very much in line with me	C. Consistent with my moderate intensity	B. a little bit in line with me.	Yes	No	Yes	Yes	Yes	No	Yes	No	Yes	Yes	No	Yes	Yes	Yes	Yes	Conform	Extremely in line	Extremely in line	Not sure	Conform	Conform	Extremely in line
359	2024/7/5 21:55:50	476 seconds	WeChat	N/A	124	Female	21-23	Undergraduate study	B. Low-intensity and low-tension sports (such as recreational volleyball, table tennis, jogging, Tai Chi, etc.)	A. Less than 10 minutes	A. Less than once A month	A. Walking, running B. Travel, outing I. Others	D. Very much in line with me	C. Consistent with my moderate intensity	B. a little bit in line with me.	C. Consistent with my moderate intensity	C. Consistent with my moderate intensity	B. a little bit in line with me.	D. Very much in line with me	C. Consistent with my moderate intensity	E. Extremely in line with me	A. Not at all.	E. Extremely in line with me	D. Very much in line with me	D. Very much in line with me	E. Extremely in line with me	A. Not at all.	Yes	Yes	Yes	Yes	Yes	Yes	Yes	No	Yes	Yes	No	Yes	Yes	Yes	Yes	Conform	Extremely in line	Conform	Extremely in line	Extremely in line	Extremely in line	Extremely in line
360	2024/7/5 21:56:00	386 seconds	WeChat	N/A	121	Male	21-23	Undergraduate study	D. High-intensity but not sustained exercise with shortness of breath and a lot of sweating (such as playing badminton, basketball, tennis, football, etc.)	C. 21 to 30 minutes	B. Three to five times a week	A. Walking and running D. Ball games	D. Very much in line with me	E. Extremely in line with me	A. Not at all.	D. Very much in line with me	C. Consistent with my moderate intensity	B. a little bit in line with me.	E. Extremely in line with me	D. Very much in line with me	C. Consistent with my moderate intensity	B. a little bit in line with me.	C. Consistent with my moderate intensity	E. Extremely in line with me	D. Very much in line with me	C. Consistent with my moderate intensity	C. Consistent with my moderate intensity	No	Yes	Yes	No	Yes	Yes	Yes	Yes	No	Yes	No	No	Yes	Yes	Yes	Conform	Extremely in line	Extremely in line	Not sure	Conform	Extremely in line	Extremely in line
361	2024/7/5 21:56:24	419 seconds	WeChat	N/A	127	Female	21-23	Undergraduate study	C. Moderate intensity and more intense and lasting exercise (such as cycling, running, playing table tennis, etc.)	C. 21 to 30 minutes	C. Two to three times a month	A. Walking and running C. Sports dance H. Swimming	E. Extremely in line with me	E. Extremely in line with me	A. Not at all.	D. Very much in line with me	D. Very much in line with me	B. a little bit in line with me.	E. Extremely in line with me	E. Extremely in line with me	C. Consistent with my moderate intensity	A. Not at all.	D. Very much in line with me	D. Very much in line with me	E. Extremely in line with me	D. Very much in line with me	B. a little bit in line with me.	Yes	No	Yes	No	Yes	Yes	No	No	Yes	Yes	Yes	Yes	No	Yes	Yes	Extremely in line	Conform	Conform	Conform	Conform	Extremely in line	Not sure
362	2024/7/5 21:56:33	527 seconds	WeChat	N/A	124	Male	21-23	Undergraduate study	C. Moderate intensity and more intense and lasting exercise (such as cycling, running, playing table tennis, etc.)	A. Less than 10 minutes	E. 1-2 times per week	B. Travel and outing C. Sports dance E. Skipping rope	E. Extremely in line with me	E. Extremely in line with me	A. Not at all.	D. Very much in line with me	E. Extremely in line with me	C. Consistent with my moderate intensity	E. Extremely in line with me	D. Very much in line with me	C. Consistent with my moderate intensity	A. Not at all.	D. Very much in line with me	D. Very much in line with me	C. Consistent with my moderate intensity	D. Very much in line with me	B. a little bit in line with me.	Yes	No	Yes	No	No	Yes	Yes	Yes	Yes	Yes	Yes	Yes	Yes	Yes	No	Extremely in line	Conform	Extremely in line	Not sure	Extremely in line	Not sure	Conform
363	2024/7/5 21:56:40	459 seconds	WeChat	N/A	132	Male	21-23	Undergraduate study	C. Moderate intensity and more intense and lasting exercise (such as cycling, running, playing table tennis, etc.)	C. 21 to 30 minutes	A. Less than once A month	B. Tourism, outings F. Tai Chi, science of health preserving H. Swimming	E. Extremely in line with me	E. Extremely in line with me	A. Not at all.	E. Extremely in line with me	D. Very much in line with me	A. Not at all.	E. Extremely in line with me	E. Extremely in line with me	E. Extremely in line with me	B. a little bit in line with me.	E. Extremely in line with me	E. Extremely in line with me	D. Very much in line with me	E. Extremely in line with me	A. Not at all.	Yes	Yes	Yes	Yes	No	Yes	No	No	Yes	Yes	Yes	Yes	Yes	No	Yes	Extremely in line	Conform	Conform	Extremely in line	Conform	Not sure	Conform
364	2024/7/5 21:56:51	550 seconds	WeChat	N/A	128	Female	21-23	Undergraduate study	D. High-intensity but not sustained exercise with shortness of breath and a lot of sweating (such as playing badminton, basketball, tennis, football, etc.)	C. 21 to 30 minutes	C. 2 to 3 times a month	E. Skipping rope H. Swimming	D. Very much in line with me	D. Very much in line with me	B. a little bit in line with me.	E. Extremely in line with me	E. Extremely in line with me	B. a little bit in line with me.	C. Consistent with my moderate intensity	C. Consistent with my moderate intensity	D. Very much in line with me	A. Not at all.	D. Very much in line with me	E. Extremely in line with me	E. Extremely in line with me	C. Consistent with my moderate intensity	A. Not at all.	No	Yes	No	Yes	Yes	Yes	No	Yes	Yes	Yes	Yes	Yes	Yes	Yes	Yes	Conform	Extremely in line	Conform	Not sure	Extremely in line	Conform	Extremely in line
365	2024/7/5 21:57:08	461 seconds	WeChat	N/A	127	Female	21-23	Undergraduate study	C. Moderate intensity and more intense and lasting exercise (such as cycling, running, playing table tennis, etc.)	D. 31 to 59 minutes	B. Three to five times a week	B. Travel, outings H. Swimming	E. Extremely in line with me	E. Extremely in line with me	B. a little bit in line with me.	D. Very much in line with me	E. Extremely in line with me	B. a little bit in line with me.	E. Extremely in line with me	D. Very much in line with me	D. Very much in line with me	B. a little bit in line with me.	D. Very much in line with me	E. Extremely in line with me	D. Very much in line with me	D. Very much in line with me	A. Not at all.	No	Yes	Yes	No	Yes	Yes	Yes	Yes	Yes	No	No	No	Yes	Yes	Yes	Conform	Not sure	Conform	Extremely in line	Extremely in line	Conform	Not sure
366	2024/7/5 21:57:19	422 seconds	WeChat	N/A	129	Female	21-23	Undergraduate study	E. High-intensity and sustained exercise with shortness of breath and a lot of sweating (such as running, aerobics sets, swimming, etc.)	C. 21 to 30 minutes	B. Three to five times a week	A. Walking, running B. Travel, outing I. Others	D. Very much in line with me	C. Consistent with my moderate intensity	A. Not at all.	E. Extremely in line with me	D. Very much in line with me	B. a little bit in line with me.	E. Extremely in line with me	D. Very much in line with me	E. Extremely in line with me	B. a little bit in line with me.	D. Very much in line with me	D. Very much in line with me	D. Very much in line with me	D. Very much in line with me	B. a little bit in line with me.	No	No	Yes	Yes	No	Yes	No	Yes	Yes	Yes	Yes	No	Yes	Yes	Yes	Extremely in line	Extremely in line	Extremely in line	Conform	Conform	Extremely in line	Extremely in line
367	2024/7/5 21:57:27	485 seconds	WeChat	N/A	130	Female	21-23	Undergraduate study	C. Moderate intensity and more intense and lasting exercise (such as cycling, running, playing table tennis, etc.)	E. More than 60 minutes	A. Less than once A month	B. Travel, outing G. Fitness equipment activities H. Swimming	D. Very much in line with me	D. Very much in line with me	C. Consistent with my moderate intensity	D. Very much in line with me	D. Very much in line with me	B. a little bit in line with me.	E. Extremely in line with me	E. Extremely in line with me	E. Extremely in line with me	C. Consistent with my moderate intensity	E. Extremely in line with me	E. Extremely in line with me	E. Extremely in line with me	D. Very much in line with me	A. Not at all.	Yes	Yes	Yes	No	No	Yes	Yes	Yes	Yes	No	Yes	Yes	Yes	Yes	Yes	Extremely in line	Extremely in line	Not sure	Conform	Extremely in line	Extremely in line	Conform
368	2024/7/5 21:57:37	417 seconds	WeChat	N/A	131	Female	21-23	Undergraduate study	C. Moderate intensity and more intense and lasting exercise (such as cycling, running, playing table tennis, etc.)	E. More than 60 minutes	D. Approximately once a day	B. Tourism, outings F. Tai Chi, science of health preserving.	D. Very much in line with me	E. Extremely in line with me	B. a little bit in line with me.	C. Consistent with my moderate intensity	E. Extremely in line with me	A. Not at all.	E. Extremely in line with me	D. Very much in line with me	E. Extremely in line with me	A. Not at all.	E. Extremely in line with me	D. Very much in line with me	D. Very much in line with me	C. Consistent with my moderate intensity	A. Not at all.	Yes	Yes	Yes	No	No	No	Yes	Yes	No	Yes	Yes	Yes	No	No	No	Conform	Extremely in line	Extremely in line	Conform	Conform	Conform	Extremely in line
369	2024/7/5 21:57:46	498 seconds	WeChat	N/A	123	Female	21-23	I'm studying in a specialist	A. Light exercise (such as walking, doing radio gymnastics, playing gateball, etc.)	D. 31 to 59 minutes	B. Three to five times a week	E. Skipping rope H. Swimming	D. Very much in line with me	D. Very much in line with me	B. a little bit in line with me.	D. Very much in line with me	E. Extremely in line with me	B. a little bit in line with me.	C. Consistent with my moderate intensity	D. Very much in line with me	E. Extremely in line with me	B. a little bit in line with me.	D. Very much in line with me	E. Extremely in line with me	C. Consistent with my moderate intensity	D. Very much in line with me	A. Not at all.	Yes	Yes	Yes	No	No	No	No	Yes	Yes	Yes	Yes	Yes	Yes	Yes	Yes	Conform	Conform	Extremely in line	Not sure	Extremely in line	Conform	Conform
370	2024/7/5 21:57:57	445 seconds	WeChat	N/A	131	Male	24-26	Undergraduate study	D. High-intensity but not sustained exercise with shortness of breath and a lot of sweating (such as playing badminton, basketball, tennis, football, etc.)	D. 31 to 59 minutes	E. 1-2 times per week	F. Tai Chi, science of health preserving G. Exercise equipment activities	E. Extremely in line with me	C. Consistent with my moderate intensity	B. a little bit in line with me.	D. Very much in line with me	E. Extremely in line with me	A. Not at all.	E. Extremely in line with me	D. Very much in line with me	D. Very much in line with me	A. Not at all.	E. Extremely in line with me	D. Very much in line with me	D. Very much in line with me	E. Extremely in line with me	B. a little bit in line with me.	Yes	Yes	Yes	No	Yes	Yes	No	No	Yes	Yes	Yes	Yes	Yes	Yes	Yes	Conform	Not sure	Conform	Extremely in line	Extremely in line	Extremely in line	Conform
371	2024/7/5 21:58:12	516 seconds	WeChat	N/A	132	Male	21-23	Undergraduate study	B. Low-intensity and low-tension sports (such as recreational volleyball, table tennis, jogging, Tai Chi, etc.)	E. More than 60 minutes	D. Approximately once a day	E. Skipping rope H. Swimming	D. Very much in line with me	D. Very much in line with me	B. a little bit in line with me.	E. Extremely in line with me	D. Very much in line with me	A. Not at all.	E. Extremely in line with me	D. Very much in line with me	E. Extremely in line with me	B. a little bit in line with me.	E. Extremely in line with me	E. Extremely in line with me	E. Extremely in line with me	E. Extremely in line with me	B. a little bit in line with me.	Yes	Yes	No	No	No	No	No	No	Yes	Yes	Yes	Yes	Yes	Yes	Yes	Not sure	Conform	Extremely in line	Extremely in line	Extremely in line	Conform	Conform
372	2024/7/5 21:58:20	460 seconds	WeChat	N/A	132	Female	21-23	I'm studying in a specialist	C. Moderate intensity and more intense and lasting exercise (such as cycling, running, playing table tennis, etc.)	E. More than 60 minutes	D. Approximately once a day	A. Walking, running F. Tai Chi, science of health preserving H. Swimming	D. Very much in line with me	D. Very much in line with me	C. Consistent with my moderate intensity	E. Extremely in line with me	E. Extremely in line with me	B. a little bit in line with me.	E. Extremely in line with me	E. Extremely in line with me	E. Extremely in line with me	A. Not at all.	D. Very much in line with me	D. Very much in line with me	D. Very much in line with me	E. Extremely in line with me	A. Not at all.	Yes	No	Yes	No	No	Yes	Yes	No	Yes	Yes	Yes	Yes	No	Yes	Yes	Conform	Extremely in line	Extremely in line	Conform	Not sure	Not sure	Extremely in line
373	2024/7/5 21:58:33	468 seconds	WeChat	N/A	135	Male	21-23	Undergraduate study	C. Moderate intensity and more intense and lasting exercise (such as cycling, running, playing table tennis, etc.)	B. 11 to 20 minutes	C. Two to three times a month	A. Walking and running E. Skipping rope F. Tai Chi and science of health preserving.	E. Extremely in line with me	E. Extremely in line with me	A. Not at all.	E. Extremely in line with me	E. Extremely in line with me	A. Not at all.	E. Extremely in line with me	D. Very much in line with me	D. Very much in line with me	A. Not at all.	E. Extremely in line with me	E. Extremely in line with me	E. Extremely in line with me	D. Very much in line with me	A. Not at all.	Yes	Yes	Yes	Yes	Yes	Yes	Yes	No	No	Yes	Yes	Yes	No	Yes	Yes	Not sure	Extremely in line	Extremely in line	Conform	Extremely in line	Conform	Not sure
374	2024/7/5 21:58:45	553 seconds	WeChat	N/A	125	Male	24-26	Undergraduate study	C. Moderate intensity and more intense and lasting exercise (such as cycling, running, playing table tennis, etc.)	C. 21 to 30 minutes	A. Less than once A month	A. Walking and running F. Tai Chi and science of health preserving.	E. Extremely in line with me	D. Very much in line with me	A. Not at all.	D. Very much in line with me	E. Extremely in line with me	A. Not at all.	E. Extremely in line with me	E. Extremely in line with me	D. Very much in line with me	B. a little bit in line with me.	E. Extremely in line with me	E. Extremely in line with me	E. Extremely in line with me	D. Very much in line with me	A. Not at all.	No	Yes	No	Yes	No	Yes	No	Yes	Yes	No	Yes	Yes	Yes	No	Yes	Not sure	Conform	Conform	Not sure	Conform	Conform	Not sure
375	2024/7/5 21:59:21	484 seconds	WeChat	N/A	120	Female	21-23	I'm studying in a specialist	C. Moderate intensity and more intense and lasting exercise (such as cycling, running, playing table tennis, etc.)	B. 11 to 20 minutes	B. Three to five times a week	D. Ball games H. Swimming	C. Consistent with my moderate intensity	D. Very much in line with me	C. Consistent with my moderate intensity	E. Extremely in line with me	D. Very much in line with me	A. Not at all.	D. Very much in line with me	E. Extremely in line with me	D. Very much in line with me	B. a little bit in line with me.	E. Extremely in line with me	D. Very much in line with me	C. Consistent with my moderate intensity	D. Very much in line with me	B. a little bit in line with me.	No	No	Yes	No	No	No	Yes	No	Yes	Yes	Yes	No	Yes	Yes	Yes	Conform	Extremely in line	Extremely in line	Conform	Conform	Not sure	Extremely in line
376	2024/7/5 21:59:30	492 seconds	WeChat	N/A	123	Female	21-23	Undergraduate study	D. High-intensity but not sustained exercise with shortness of breath and a lot of sweating (such as playing badminton, basketball, tennis, football, etc.)	B. 11 to 20 minutes	B. Three to five times a week	A. Walking and running B. Travel and outing E. Skipping rope	E. Extremely in line with me	D. Very much in line with me	A. Not at all.	C. Consistent with my moderate intensity	E. Extremely in line with me	A. Not at all.	D. Very much in line with me	D. Very much in line with me	D. Very much in line with me	A. Not at all.	E. Extremely in line with me	C. Consistent with my moderate intensity	D. Very much in line with me	D. Very much in line with me	A. Not at all.	Yes	Yes	Yes	No	Yes	No	Yes	Yes	Yes	Yes	Yes	Yes	No	No	Yes	Conform	Conform	Conform	Conform	Extremely in line	Not sure	Conform
377	2024/7/5 21:59:56	479 seconds	WeChat	N/A	127	Female	21-23	Undergraduate study	D. High-intensity but not sustained exercise with shortness of breath and a lot of sweating (such as playing badminton, basketball, tennis, football, etc.)	B. 11 to 20 minutes	E. 1-2 times per week	B. Travel, outing E. Skipping G. Fitness equipment activities	D. Very much in line with me	E. Extremely in line with me	A. Not at all.	D. Very much in line with me	C. Consistent with my moderate intensity	A. Not at all.	C. Consistent with my moderate intensity	D. Very much in line with me	D. Very much in line with me	C. Consistent with my moderate intensity	E. Extremely in line with me	E. Extremely in line with me	D. Very much in line with me	D. Very much in line with me	A. Not at all.	Yes	Yes	No	No	Yes	Yes	Yes	Yes	Yes	Yes	Yes	No	Yes	Yes	No	Conform	Not sure	Conform	Conform	Conform	Conform	Extremely in line
378	2024/7/5 22:00:12	536 seconds	WeChat	N/A	126	Male	21-23	Undergraduate study	D. High-intensity but not sustained exercise with shortness of breath and a lot of sweating (such as playing badminton, basketball, tennis, football, etc.)	C. 21 to 30 minutes	A. Less than once A month	A. Walking and running H. Swimming	D. Very much in line with me	D. Very much in line with me	B. a little bit in line with me.	D. Very much in line with me	C. Consistent with my moderate intensity	A. Not at all.	D. Very much in line with me	D. Very much in line with me	D. Very much in line with me	B. a little bit in line with me.	D. Very much in line with me	E. Extremely in line with me	E. Extremely in line with me	D. Very much in line with me	A. Not at all.	No	Yes	Yes	Yes	Yes	Yes	Yes	Yes	Yes	Yes	No	Yes	No	Yes	Yes	Not sure	Conform	Extremely in line	Conform	Extremely in line	Not sure	Extremely in line
379	2024/7/5 22:50:49	283 seconds	WeChat	N/A	86	Male	21-23	Undergraduate study	D. High-intensity but not sustained exercise with shortness of breath and a lot of sweating (such as playing badminton, basketball, tennis, football, etc.)	E. More than 60 minutes	B. Three to five times a week	D. Ball games	A. Not at all.	A. Not at all.	A. Not at all.	B. a little bit in line with me.	A. Not at all.	B. a little bit in line with me.	A. Not at all.	A. Not at all.	B. a little bit in line with me.	C. Consistent with my moderate intensity	B. a little bit in line with me.	A. Not at all.	A. Not at all.	A. Not at all.	C. Consistent with my moderate intensity	Yes	Yes	No	Yes	Yes	Yes	Yes	Yes	Yes	No	Yes	Yes	No	No	No	Conform	Conform	Does not match	Not sure	Not sure	Conform	Conform
380	2024/7/5 23:53:33	91 seconds	WeChat	N/A	67	Male	24-26	I'm studying for a master's degree	C. Moderate intensity and more intense and lasting exercise (such as cycling, running, playing table tennis, etc.)	C. 21 to 30 minutes	E. 1-2 times per week	A. Walking, running F. Tai Chi, science of health preserving G. Exercise machine activities H. Swimming I. Others	A. Not at all.	A. Not at all.	A. Not at all.	A. Not at all.	A. Not at all.	A. Not at all.	A. Not at all.	A. Not at all.	A. Not at all.	A. Not at all.	A. Not at all.	A. Not at all.	A. Not at all.	A. Not at all.	A. Not at all.	Yes	Yes	Yes	Yes	Yes	Yes	Yes	Yes	Yes	Yes	Yes	Yes	Yes	Yes	Yes	Extremely inconsistent	Extremely inconsistent	Extremely inconsistent	Extremely inconsistent	Extremely inconsistent	Extremely inconsistent	Extremely inconsistent
381	2024/7/6 0:10:58	216 seconds	WeChat	N/A	87	Male	24-26	I'm studying for a master's degree	B. Low-intensity and low-tension sports (such as recreational volleyball, table tennis, jogging, Tai Chi, etc.)	E. More than 60 minutes	C. Two to three times a month	A. Walking and running D. Ball games E. Skipping rope H. Swimming	A. Not at all.	B. a little bit in line with me.	A. Not at all.	C. Consistent with my moderate intensity	A. Not at all.	C. Consistent with my moderate intensity	A. Not at all.	B. a little bit in line with me.	C. Consistent with my moderate intensity	C. Consistent with my moderate intensity	C. Consistent with my moderate intensity	B. a little bit in line with me.	B. a little bit in line with me.	B. a little bit in line with me.	B. a little bit in line with me.	No	No	No	Yes	No	No	No	Yes	No	No	Yes	Yes	No	No	Yes	Conform	Conform	Not sure	Not sure	Not sure	Conform	Conform
382	2024/7/7 1:19:11	113 seconds	WeChat	N/A	93	Female	18-20	I'm studying in a specialist	A. Light exercise (such as walking, doing radio gymnastics, playing gateball, etc.)	E. More than 60 minutes	E. 1-2 times per week	A. Walking and running C. Sports dance D. Ball games	A. Not at all.	B. a little bit in line with me.	B. a little bit in line with me.	B. a little bit in line with me.	B. a little bit in line with me.	B. a little bit in line with me.	B. a little bit in line with me.	B. a little bit in line with me.	B. a little bit in line with me.	B. a little bit in line with me.	B. a little bit in line with me.	A. Not at all.	B. a little bit in line with me.	B. a little bit in line with me.	B. a little bit in line with me.	Yes	Yes	No	No	No	Yes	Yes	Yes	Yes	Yes	Yes	Yes	No	No	No	Conform	Not sure	Conform	Conform	Conform	Conform	Not sure
383	2024/7/8 16:40:33	110 seconds	WeChat	N/A	114	Female	21-23	Undergraduate study	B. Low-intensity and low-tension sports (such as recreational volleyball, table tennis, jogging, Tai Chi, etc.)	C. 21 to 30 minutes	C. Two to three times a month	C. Sports Dance F. Tai Chi and science of health preserving.	B. a little bit in line with me.	B. a little bit in line with me.	C. Consistent with my moderate intensity	C. Consistent with my moderate intensity	B. a little bit in line with me.	C. Consistent with my moderate intensity	D. Very much in line with me	D. Very much in line with me	E. Extremely in line with me	C. Consistent with my moderate intensity	D. Very much in line with me	E. Extremely in line with me	D. Very much in line with me	E. Extremely in line with me	C. Consistent with my moderate intensity	Yes	Yes	No	Yes	Yes	Yes	Yes	Yes	Yes	Yes	Yes	Yes	No	Yes	Yes	Conform	Conform	Not sure	Conform	Conform	Extremely in line	Conform
384	2024/7/8 16:51:05	157 seconds	Mobile submission	Direct access	80	Female	24-26	I'm studying for a master's degree	B. Low-intensity and low-tension sports (such as recreational volleyball, table tennis, jogging, Tai Chi, etc.)	D. 31 to 59 minutes	B. Three to five times a week	B. Travel, outings H. Swimming	A. Not at all.	B. a little bit in line with me.	B. a little bit in line with me.	B. a little bit in line with me.	B. a little bit in line with me.	D. Very much in line with me	B. a little bit in line with me.	B. a little bit in line with me.	A. Not at all.	D. Very much in line with me	B. a little bit in line with me.	B. a little bit in line with me.	A. Not at all.	B. a little bit in line with me.	C. Consistent with my moderate intensity	Yes	No	Yes	Yes	No	No	No	No	No	No	Yes	Yes	Yes	No	Yes	Conform	Not sure	Does not match	Not sure	Conform	Conform	Conform
385	2024/7/9 10:16:40	238 seconds	WeChat	N/A	101	Female	27-29	I'm studying for a master's degree	B. Low-intensity and low-tension sports (such as recreational volleyball, table tennis, jogging, Tai Chi, etc.)	C. 21 to 30 minutes	E. 1-2 times per week	B. Tourism, outings F. Tai Chi, science of health preserving.	B. a little bit in line with me.	C. Consistent with my moderate intensity	B. a little bit in line with me.	B. a little bit in line with me.	A. Not at all.	A. Not at all.	A. Not at all.	D. Very much in line with me	D. Very much in line with me	B. a little bit in line with me.	D. Very much in line with me	A. Not at all.	B. a little bit in line with me.	B. a little bit in line with me.	A. Not at all.	Yes	Yes	No	No	Yes	Yes	Yes	Yes	Yes	No	Yes	Yes	No	No	No	Conform	Conform	Conform	Conform	Not sure	Conform	Conform
386	2024/7/9 10:18:09	137 seconds	WeChat	N/A	107	Female	21-23	I'm studying for a master's degree	B. Low-intensity and low-tension sports (such as recreational volleyball, table tennis, jogging, Tai Chi, etc.)	D. 31 to 59 minutes	B. Three to five times a week	A. Walking and running D. Ball games	B. a little bit in line with me.	D. Very much in line with me	B. a little bit in line with me.	C. Consistent with my moderate intensity	D. Very much in line with me	D. Very much in line with me	D. Very much in line with me	E. Extremely in line with me	E. Extremely in line with me	B. a little bit in line with me.	C. Consistent with my moderate intensity	E. Extremely in line with me	D. Very much in line with me	D. Very much in line with me	B. a little bit in line with me.	No	No	No	Yes	Yes	No	Yes	Yes	Yes	No	Yes	Yes	No	No	No	Conform	Not sure	Conform	Not sure	Not sure	Conform	Conform
387	2024/7/9 20:52:55	193 seconds	WeChat	N/A	96	Female	21-23	Undergraduate study	A. Light exercise (such as walking, doing radio gymnastics, playing gateball, etc.)	E. More than 60 minutes	A. Less than once A month	A. Walking and running C. Sports dance E. Skipping rope G. Fitness equipment activities	A. Not at all.	B. a little bit in line with me.	A. Not at all.	E. Extremely in line with me	C. Consistent with my moderate intensity	B. a little bit in line with me.	A. Not at all.	E. Extremely in line with me	E. Extremely in line with me	C. Consistent with my moderate intensity	C. Consistent with my moderate intensity	A. Not at all.	A. Not at all.	D. Very much in line with me	D. Very much in line with me	Yes	Yes	Yes	Yes	Yes	Yes	No	Yes	Yes	No	Yes	Yes	No	No	Yes	Conform	Conform	Does not match	Conform	Does not match	Conform	Conform
388	2024/7/11 16:41:00	201 seconds	WeChat	N/A	111	Female	21-23	I'm studying for a master's degree	A. Light exercise (such as walking, doing radio gymnastics, playing gateball, etc.)	D. 31 to 59 minutes	D. Approximately once a day	B. Tourism and outings D. Ball games F. Tai Chi and science of health preserving.	B. a little bit in line with me.	A. Not at all.	A. Not at all.	B. a little bit in line with me.	B. a little bit in line with me.	B. a little bit in line with me.	A. Not at all.	D. Very much in line with me	E. Extremely in line with me	B. a little bit in line with me.	B. a little bit in line with me.	E. Extremely in line with me	D. Very much in line with me	E. Extremely in line with me	D. Very much in line with me	Yes	Yes	No	Yes	Yes	Yes	Yes	Yes	Yes	Yes	Yes	Yes	No	No	No	Conform	Conform	Does not match	Conform	Extremely in line	Extremely in line	Conform
389	2024/7/11 16:42:11	267 seconds	WeChat	N/A	101	Female	18-20	Undergraduate study	B. Low-intensity and low-tension sports (such as recreational volleyball, table tennis, jogging, Tai Chi, etc.)	C. 21 to 30 minutes	B. Three to five times a week	A. Walking, running B. Travel, outing C. Sports dance	A. Not at all.	B. a little bit in line with me.	C. Consistent with my moderate intensity	D. Very much in line with me	B. a little bit in line with me.	B. a little bit in line with me.	C. Consistent with my moderate intensity	B. a little bit in line with me.	E. Extremely in line with me	B. a little bit in line with me.	B. a little bit in line with me.	E. Extremely in line with me	A. Not at all.	E. Extremely in line with me	D. Very much in line with me	Yes	Yes	No	Yes	Yes	Yes	Yes	Yes	Yes	Yes	Yes	Yes	No	No	No	Extremely inconsistent	Conform	Conform	Conform	Conform	Extremely in line	Extremely in line
390	2024/7/14 9:27:36	288 seconds	WeChat	N/A	90	Female	21-23	I'm studying for a master's degree	A. Light exercise (such as walking, doing radio gymnastics, playing gateball, etc.)	C. 21 to 30 minutes	D. Approximately once a day	A. Walking, running B. Travel, outing C. Sports dance F. Tai Chi, science of health preserving.	A. Not at all.	B. a little bit in line with me.	D. Very much in line with me	B. a little bit in line with me.	A. Not at all.	C. Consistent with my moderate intensity	B. a little bit in line with me.	A. Not at all.	D. Very much in line with me	E. Extremely in line with me	A. Not at all.	B. a little bit in line with me.	D. Very much in line with me	E. Extremely in line with me	D. Very much in line with me	Yes	Yes	Yes	Yes	Yes	No	No	Yes	Yes	Yes	Yes	No	Yes	No	No	Not sure	Not sure	Not sure	Conform	Conform	Extremely in line	Extremely in line
391	2024/7/14 18:26:14	183 seconds	Mobile submission	Direct access	93	Male	24-26	Undergraduate study	B. Low-intensity and low-tension sports (such as recreational volleyball, table tennis, jogging, Tai Chi, etc.)	D. 31 to 59 minutes	B. Three to five times a week	A. Walking, running B. Travel, outing D. Ball games H. Swimming I. Others	C. Consistent with my moderate intensity	C. Consistent with my moderate intensity	D. Very much in line with me	B. a little bit in line with me.	C. Consistent with my moderate intensity	D. Very much in line with me	C. Consistent with my moderate intensity	C. Consistent with my moderate intensity	C. Consistent with my moderate intensity	D. Very much in line with me	D. Very much in line with me	D. Very much in line with me	C. Consistent with my moderate intensity	C. Consistent with my moderate intensity	C. Consistent with my moderate intensity	Yes	Yes	No	Yes	Yes	Yes	Yes	Yes	Yes	No	Yes	Yes	No	Yes	Yes	Not sure	Not sure	Not sure	Not sure	Not sure	Not sure	Not sure
392	2024/7/14 20:10:53	138 seconds	Mobile submission	Direct access	108	Female	18-20	Undergraduate study	D. High-intensity but not sustained exercise with shortness of breath and a lot of sweating (such as playing badminton, basketball, tennis, football, etc.)	D. 31 to 59 minutes	E. 1-2 times per week	D. Ball games H. Swimming	B. a little bit in line with me.	C. Consistent with my moderate intensity	B. a little bit in line with me.	C. Consistent with my moderate intensity	C. Consistent with my moderate intensity	A. Not at all.	A. Not at all.	B. a little bit in line with me.	E. Extremely in line with me	B. a little bit in line with me.	A. Not at all.	E. Extremely in line with me	C. Consistent with my moderate intensity	E. Extremely in line with me	A. Not at all.	Yes	Yes	No	Yes	Yes	Yes	Yes	Yes	No	Yes	Yes	Yes	No	Yes	No	Not sure	Conform	Not sure	Extremely inconsistent	Does not match	Extremely in line	Conform
393	2024/7/16 17:01:56	166 seconds	Mobile submission	Direct access	107	Female	21-23	Undergraduate study	B. Low-intensity and low-tension sports (such as recreational volleyball, table tennis, jogging, Tai Chi, etc.)	C. 21 to 30 minutes	B. Three to five times a week	A. Walking and running B. Travel and outing E. Skipping rope	C. Consistent with my moderate intensity	D. Very much in line with me	A. Not at all.	D. Very much in line with me	D. Very much in line with me	A. Not at all.	C. Consistent with my moderate intensity	D. Very much in line with me	D. Very much in line with me	A. Not at all.	D. Very much in line with me	D. Very much in line with me	D. Very much in line with me	D. Very much in line with me	A. Not at all.	No	No	Yes	Yes	No	No	No	No	No	No	No	No	Yes	Yes	Yes	Does not match	Does not match	Does not match	Not sure	Conform	Conform	Conform
394	2024/7/16 21:06:58	185 seconds	Mobile submission	Direct access	102	Female	18-20	Undergraduate study	B. Low-intensity and low-tension sports (such as recreational volleyball, table tennis, jogging, Tai Chi, etc.)	C. 21 to 30 minutes	C. 2 to 3 times a month	A. Walking and running	B. a little bit in line with me.	C. Consistent with my moderate intensity	A. Not at all.	C. Consistent with my moderate intensity	C. Consistent with my moderate intensity	B. a little bit in line with me.	B. a little bit in line with me.	D. Very much in line with me	E. Extremely in line with me	B. a little bit in line with me.	B. a little bit in line with me.	A. Not at all.	B. a little bit in line with me.	C. Consistent with my moderate intensity	B. a little bit in line with me.	Yes	Yes	No	No	Yes	Yes	Yes	Yes	Yes	Yes	Yes	Yes	Yes	Yes	Yes	Conform	Conform	Not sure	Not sure	Not sure	Conform	Conform
395	2024/7/20 14:05:40	145 seconds	Mobile submission	Direct access	98	Female	18-20	Undergraduate study	A. Light exercise (such as walking, doing radio gymnastics, playing gateball, etc.)	B. 11 to 20 minutes	E. 1-2 times per week	A. Walking and running E. Skipping rope	D. Very much in line with me	E. Extremely in line with me	A. Not at all.	D. Very much in line with me	D. Very much in line with me	A. Not at all.	D. Very much in line with me	D. Very much in line with me	C. Consistent with my moderate intensity	A. Not at all.	E. Extremely in line with me	C. Consistent with my moderate intensity	D. Very much in line with me	D. Very much in line with me	A. Not at all.	Yes	No	No	Yes	Yes	Yes	Yes	No	No	No	No	Yes	Yes	No	Yes	Not sure	Not sure	Does not match	Does not match	Extremely inconsistent	Does not match	Does not match
396	2024/7/23 17:21:10	165 seconds	WeChat	N/A	114	Female	24-26	I'm studying for a master's degree	D. High-intensity but not sustained exercise with shortness of breath and a lot of sweating (such as playing badminton, basketball, tennis, football, etc.)	D. 31 to 59 minutes	A. Less than once A month	A. Walking and running D. Ball games	C. Consistent with my moderate intensity	D. Very much in line with me	B. a little bit in line with me.	D. Very much in line with me	D. Very much in line with me	A. Not at all.	D. Very much in line with me	D. Very much in line with me	E. Extremely in line with me	A. Not at all.	D. Very much in line with me	D. Very much in line with me	E. Extremely in line with me	D. Very much in line with me	A. Not at all.	Yes	No	No	Yes	Yes	Yes	Yes	Yes	Yes	Yes	Yes	Yes	No	No	Yes	Conform	Not sure	Not sure	Does not match	Does not match	Conform	Does not match
397	2024/7/29 20:03:00	83 seconds	WeChat	N/A	109	Female	24-26	I'm studying for a master's degree	A. Light exercise (such as walking, doing radio gymnastics, playing gateball, etc.)	C. 21 to 30 minutes	C. Two to three times a month	A. Walking and running B. Travel and outing	D. Very much in line with me	D. Very much in line with me	C. Consistent with my moderate intensity	D. Very much in line with me	D. Very much in line with me	B. a little bit in line with me.	D. Very much in line with me	D. Very much in line with me	D. Very much in line with me	B. a little bit in line with me.	D. Very much in line with me	D. Very much in line with me	D. Very much in line with me	D. Very much in line with me	B. a little bit in line with me.	Yes	Yes	No	No	Yes	Yes	Yes	Yes	Yes	No	Yes	Yes	No	No	No	Conform	Conform	Not sure	Not sure	Not sure	Conform	Conform
398	2024/7/30 4:00:57	123 seconds	Link	Direct access	102	Male	21-23	I'm studying for a master's degree	D. High-intensity but not sustained exercise with shortness of breath and a lot of sweating (such as playing badminton, basketball, tennis, football, etc.)	E. More than 60 minutes	B. Three to five times a week	D. Ball games G. Exercise equipment activities	A. Not at all.	B. a little bit in line with me.	C. Consistent with my moderate intensity	B. a little bit in line with me.	B. a little bit in line with me.	A. Not at all.	A. Not at all.	B. a little bit in line with me.	E. Extremely in line with me	C. Consistent with my moderate intensity	B. a little bit in line with me.	B. a little bit in line with me.	A. Not at all.	C. Consistent with my moderate intensity	C. Consistent with my moderate intensity	Yes	Yes	No	Yes	Yes	Yes	Yes	Yes	Yes	No	Yes	Yes	No	No	No	Extremely in line	Conform	Conform	Extremely in line	Conform	Extremely in line	Conform
399	2024/7/31 23:55:10	166 seconds	WeChat	N/A	102	Male	24-26	I'm studying for a master's degree	D. High-intensity but not sustained exercise with shortness of breath and a lot of sweating (such as playing badminton, basketball, tennis, football, etc.)	E. More than 60 minutes	B. Three to five times a week	B. Tourism and outing C. Sports dance D. Ball games F. Tai Chi and science of health preserving.	B. a little bit in line with me.	C. Consistent with my moderate intensity	C. Consistent with my moderate intensity	C. Consistent with my moderate intensity	C. Consistent with my moderate intensity	C. Consistent with my moderate intensity	B. a little bit in line with me.	B. a little bit in line with me.	D. Very much in line with me	D. Very much in line with me	D. Very much in line with me	A. Not at all.	B. a little bit in line with me.	B. a little bit in line with me.	A. Not at all.	Yes	Yes	No	No	Yes	Yes	No	Yes	Yes	Yes	Yes	Yes	Yes	No	No	Conform	Conform	Conform	Extremely in line	Conform	Not sure	Conform
[truncated: 3 more columns]
