# Supplementary material for: The impact of physical activity on social anxiety among college students: an analysis of the chain mediation effect of family support and self-efficacy
Source: PeerJ journal article supplement (doi:10.7717/peerj.20511), 2026-01-05
Supplement: raw_data.zip [file Valid Questionnaire Responses.xlsx]

## Sheet: Sheet1
YD1	YD2	YD3	SJ1	SJ2	SJ3（R）	SJ4	SJ5	SJ6(R)	SJ7	SJ8	SJ9	SJ10(R)	SJ11	SJ12	SJ13	SJ14	SJ15(R)	JT1	JT2	JT3(R)	JT4	JT5	JT6	JT7	JT8	JT9	JT10	JT11	JT12	JT13(R)	JT14(R)	JT15(R)	ZW1	ZW2	ZW3	ZW4	ZW5	ZW6	ZW7	ZW8	ZW9	ZW10	SEX	AGE	DEGREE
2	5	2	4	5	3	4	4	3	3	4	4	3	3	4	4	4	3	1	1	1	1	1	1	1	1	1	0	1	1	1	1	0	4	4	4	4	3	4	3	4	4	3	1	2	1
5	3	3	1	1	4	2	1	4	2	2	2	4	2	2	2	2	4	1	1	1	0	1	1	1	1	1	0	1	1	1	1	1	4	4	2	4	3	3	4	4	4	3	1	3	2
1	1	1	4	5	5	4	4	1	2	5	5	4	4	5	1	4	5	0	0	0	1	0	0	0	0	0	0	0	0	1	1	0	3	3	3	1	3	4	3	4	4	2	2	3	1
2	5	5	1	2	4	3	1	4	1	3	4	4	3	4	4	4	2	1	1	1	0	1	1	1	1	1	0	1	1	1	1	0	3	4	3	2	2	4	2	2	2	2	2	3	2
3	4	5	1	2	5	2	1	2	1	3	2	5	2	3	1	3	4	1	1	1	0	1	1	1	1	1	0	1	1	1	1	1	4	3	2	3	3	3	3	3	4	3	2	3	2
2	2	5	4	5	5	4	4	3	3	3	3	5	2	2	4	4	5	0	0	1	1	0	0	0	0	0	1	1	0	1	1	1	4	4	3	3	3	4	4	3	4	3	2	1	1
1	3	1	1	2	4	2	1	4	2	2	2	4	2	2	2	2	4	1	0	1	0	1	0	1	0	1	0	1	1	1	1	1	4	4	3	3	4	4	4	3	4	4	1	1	1
1	2	3	4	4	3	4	4	5	3	3	3	5	4	3	4	4	3	1	1	1	0	1	0	0	1	1	0	1	1	0	0	1	4	4	3	3	3	4	3	3	4	3	2	1	1
2	5	5	2	3	5	4	2	5	2	4	4	3	2	2	2	4	5	1	0	0	1	1	0	0	0	1	0	1	0	1	1	0	3	3	2	2	2	3	2	4	4	3	2	2	1
2	5	5	2	1	4	2	1	4	1	2	3	3	5	2	2	2	4	1	1	1	1	1	1	1	1	1	0	1	1	1	1	1	4	4	3	3	3	4	4	4	4	3	1	1	1
2	3	5	2	4	4	3	2	5	2	3	3	5	2	3	2	3	4	1	1	1	0	1	1	1	1	1	1	1	1	1	1	1	4	4	3	3	3	4	3	3	4	3	2	1	1
4	5	2	2	2	4	4	2	4	2	4	4	4	2	3	3	3	4	1	1	1	1	1	1	1	1	1	1	1	1	1	1	1	4	4	3	4	3	4	4	3	4	3	1	1	1
3	4	3	2	2	4	2	3	2	3	4	5	3	4	4	3	3	4	1	1	0	1	1	1	1	1	1	1	1	1	0	0	0	4	4	3	4	4	4	4	3	3	2	1	1	1
1	3	2	2	2	4	3	3	3	2	2	5	2	2	1	2	3	4	1	1	1	0	1	1	0	1	1	0	1	1	1	1	1	4	4	3	3	3	5	5	4	5	5	1	1	1
2	4	5	1	2	3	2	2	2	2	3	2	2	2	3	2	3	2	1	1	1	0	1	1	1	1	1	0	1	1	1	1	1	4	3	3	3	3	4	3	3	3	3	2	1	1
1	1	2	1	2	2	1	3	3	3	3	3	3	5	5	4	3	3	0	0	0	0	1	0	0	0	1	1	1	0	1	1	0	3	3	3	3	3	3	3	3	3	3	1	1	1
4	3	3	2	2	5	2	3	5	2	2	5	4	2	2	3	4	4	1	1	1	1	1	1	1	1	1	1	1	1	1	1	1	4	4	3	4	3	4	4	3	4	3	2	1	1
3	4	4	2	3	3	3	1	5	1	2	3	3	2	2	2	2	4	1	1	1	1	1	1	1	1	1	1	1	1	0	0	0	5	4	3	3	3	4	4	4	4	4	1	1	1
2	3	3	2	2	4	2	2	4	2	2	2	4	2	2	2	2	4	1	1	0	1	1	1	1	1	1	1	1	1	0	0	0	4	4	4	3	3	3	3	3	3	3	2	1	1
2	2	2	3	3	3	3	3	3	3	3	3	3	3	3	3	3	3	0	0	0	0	0	0	0	0	0	1	0	0	1	1	0	4	3	3	3	3	3	3	3	3	3	1	1	1
3	3	5	3	4	4	4	3	3	4	4	5	4	2	5	3	5	3	1	1	0	1	1	0	0	0	0	0	1	1	1	1	0	4	3	3	2	3	4	4	4	4	3	1	1	1
3	4	4	2	2	2	2	2	4	2	4	4	3	3	3	2	2	4	1	1	0	0	1	1	1	1	1	1	1	1	0	0	0	4	3	3	3	3	4	3	3	3	3	1	1	1
3	3	5	3	3	5	2	3	5	2	2	3	4	3	3	1	2	4	1	1	1	0	1	0	1	1	1	1	1	1	0	0	0	3	3	2	3	3	3	3	3	4	3	1	1	1
4	5	5	1	2	2	2	2	4	2	2	2	4	2	2	2	2	4	1	1	1	1	0	0	1	1	1	0	1	1	1	1	1	3	3	3	3	3	3	4	4	4	3	1	3	2
4	5	3	2	2	5	4	2	4	1	4	4	5	3	3	2	4	1	1	1	0	0	1	1	1	1	1	0	1	1	0	0	0	4	3	4	3	3	4	4	4	4	2	2	3	2
2	5	5	4	4	4	4	4	1	4	5	5	5	5	4	4	4	5	1	1	1	1	1	1	1	1	1	1	1	1	1	1	0	4	4	3	3	3	4	4	3	3	3	2	2	2
4	5	5	1	2	2	3	3	4	1	5	5	4	4	4	5	5	3	1	1	1	0	0	0	0	0	1	0	1	1	1	1	1	4	3	3	2	3	3	3	4	3	2	1	2	1
2	3	3	2	2	4	3	4	3	3	2	2	2	4	4	2	2	5	1	1	0	1	1	1	1	1	1	1	1	1	0	0	0	3	3	3	3	1	3	4	2	4	3	1	3	2
1	2	5	2	4	5	4	4	4	3	4	4	3	3	2	3	3	4	1	1	1	0	1	1	1	1	1	0	1	1	1	1	1	4	4	4	3	3	4	4	4	4	3	2	1	1
4	5	4	1	1	5	1	1	5	1	2	5	1	1	1	1	2	1	0	0	0	0	0	0	0	0	0	1	0	0	1	1	0	4	4	3	2	2	4	4	4	4	2	1	2	2
1	3	3	4	2	4	2	2	4	2	3	5	3	5	2	2	2	3	1	1	1	1	1	1	1	1	1	1	1	1	0	0	0	5	5	5	5	5	5	5	5	5	5	2	3	2
4	4	4	2	1	4	4	4	3	2	4	4	3	4	3	3	3	3	1	1	1	0	1	1	1	1	1	1	1	1	0	0	0	2	3	3	4	4	4	4	4	4	4	2	3	2
1	3	3	1	1	3	2	1	5	1	2	1	3	1	2	1	2	4	1	1	1	1	1	1	1	1	1	1	1	1	0	0	0	5	5	5	5	5	5	5	5	5	5	2	1	1
4	5	4	1	3	3	2	1	4	3	2	5	3	1	4	3	4	4	1	0	1	0	1	0	0	0	1	0	1	1	0	0	0	4	3	2	4	3	4	4	3	4	4	1	2	1
1	2	3	3	3	5	3	3	5	2	4	4	3	2	2	4	3	4	1	1	1	0	1	1	1	1	1	1	1	1	1	1	1	4	4	3	3	3	3	4	4	4	3	2	1	1
4	4	3	2	5	5	4	4	3	1	4	4	4	1	3	2	4	5	1	1	1	0	1	1	1	1	1	1	1	1	1	1	1	4	4	3	2	3	4	3	4	4	3	2	2	2
5	5	2	2	2	4	2	4	4	2	2	2	3	3	2	3	2	4	1	0	0	0	0	0	1	1	1	1	1	1	0	0	0	3	3	1	2	1	1	2	2	2	3	1	3	2
2	5	5	5	3	3	5	4	4	2	1	1	5	5	4	2	3	4	1	1	0	0	1	0	0	1	1	0	1	1	1	1	1	1	3	3	4	4	4	2	5	5	1	1	3	2
2	4	5	2	3	4	3	3	3	3	3	3	3	3	3	3	3	3	1	1	0	1	1	1	1	1	1	1	1	1	0	0	0	4	4	3	4	4	4	4	4	4	4	2	2	2
4	3	5	2	3	3	3	3	4	2	3	4	3	3	3	1	4	3	1	1	1	0	1	1	1	1	1	1	1	1	0	0	1	4	4	4	4	4	4	4	4	4	4	2	1	1
1	4	5	3	4	3	2	3	4	2	3	5	5	4	2	2	2	4	1	0	0	1	0	0	0	1	0	0	0	1	0	0	0	4	3	2	3	2	4	4	3	4	3	2	2	1
1	3	3	1	2	3	3	2	2	3	2	4	4	2	2	3	3	4	1	1	1	1	1	1	1	1	1	0	1	1	1	1	1	4	4	3	4	4	4	4	3	4	3	1	1	1
2	3	3	3	3	5	3	2	2	3	4	4	5	3	3	3	3	5	1	1	1	0	1	1	1	1	1	0	1	1	1	1	1	3	3	3	3	3	3	3	4	4	3	1	2	1
5	4	3	2	2	5	3	2	4	5	5	5	5	5	5	5	5	5	1	1	1	1	1	0	0	1	1	0	1	1	1	1	0	3	3	1	1	1	3	2	2	3	1	2	2	2
2	3	3	2	2	3	4	2	2	4	5	5	4	3	2	2	4	5	0	0	1	0	1	1	0	0	1	1	0	0	1	1	0	4	4	3	3	3	4	2	2	3	3	2	2	1
2	2	1	3	2	4	2	3	3	2	4	5	3	2	4	5	5	3	1	1	1	1	1	1	1	1	1	1	1	1	1	1	0	3	3	1	4	5	5	2	2	5	3	2	2	1
1	1	5	1	3	3	2	2	3	4	3	3	4	3	2	3	4	3	0	0	0	0	0	0	0	0	0	0	0	0	1	1	0	4	4	4	4	4	5	5	4	5	5	1	2	2
1	4	2	2	2	4	2	2	4	2	2	2	4	2	2	2	2	4	1	1	1	0	1	1	1	1	1	0	1	1	0	0	0	4	4	4	4	4	4	4	4	4	3	1	3	2
2	3	5	3	4	3	2	2	4	1	5	5	4	2	5	2	5	5	1	1	1	0	1	1	1	1	1	1	1	1	1	1	1	4	4	4	4	4	3	3	2	4	3	2	2	1
4	5	5	2	3	2	3	3	3	3	4	4	4	1	2	3	4	4	1	1	1	1	1	1	1	1	0	0	1	1	1	1	1	5	5	3	3	2	5	5	4	4	3	1	3	2
5	5	5	1	1	3	5	2	3	3	5	5	5	3	3	1	4	5	1	1	1	1	1	1	1	1	1	1	1	1	0	0	1	4	3	2	2	2	3	2	4	3	3	2	2	1
1	3	3	3	4	4	4	3	3	2	4	3	3	2	2	3	3	4	1	1	1	0	1	1	1	1	1	1	1	1	1	1	1	4	3	3	2	3	4	3	3	4	3	2	2	2
5	4	2	3	4	3	3	3	3	3	3	3	3	3	4	3	4	4	1	1	1	0	1	0	1	1	1	1	1	1	1	1	0	5	4	4	4	5	5	5	5	5	4	2	3	2
2	3	3	2	3	4	3	3	3	3	3	4	4	2	3	2	4	5	1	0	1	1	1	1	0	1	1	0	1	1	1	1	0	4	4	3	3	3	4	3	3	3	3	2	1	1
3	3	1	1	1	4	2	1	4	1	3	4	4	2	1	1	5	4	1	1	1	1	1	1	0	1	1	0	1	1	1	1	1	3	3	3	2	3	2	3	4	4	3	2	3	2
3	4	3	4	4	4	3	3	3	3	4	4	4	4	4	4	4	5	0	1	1	0	0	0	0	0	1	1	1	1	1	1	0	4	3	3	3	4	4	4	4	4	4	1	2	1
2	3	3	2	2	5	3	1	4	1	2	3	3	3	2	2	3	3	0	0	1	0	0	0	0	1	1	0	1	1	1	1	0	4	4	2	3	3	4	4	3	4	3	1	3	2
1	2	2	3	3	5	4	5	1	5	4	1	2	5	4	5	4	3	1	0	1	1	1	1	0	0	0	1	0	1	0	0	0	3	2	4	3	3	4	3	3	4	3	2	2	2
3	5	2	1	1	2	1	1	5	1	3	2	2	1	1	1	1	2	1	1	1	1	1	1	0	0	1	1	1	1	1	1	1	4	3	4	3	3	3	3	3	4	3	2	3	2
2	3	1	2	4	2	2	2	4	1	4	2	4	3	3	2	2	4	1	0	1	0	1	1	1	1	0	1	1	1	0	0	1	4	3	2	2	2	2	3	3	3	3	1	3	1
2	3	3	2	2	3	2	2	4	1	2	3	4	2	2	3	3	5	0	1	1	1	1	1	1	1	1	0	1	1	1	1	1	4	4	3	4	4	4	4	4	4	4	2	2	1
1	4	3	1	2	2	1	2	4	2	2	1	5	3	1	2	2	4	0	0	0	0	1	0	0	0	0	0	1	0	1	1	0	4	4	3	4	4	4	4	3	4	4	2	1	1
4	3	3	2	2	1	5	2	4	1	4	5	5	2	4	3	4	3	1	1	1	0	1	1	1	1	1	1	1	1	1	1	0	4	5	3	2	3	4	3	4	4	3	1	2	1
2	4	5	2	3	4	4	3	4	2	4	4	4	4	5	3	5	4	1	1	1	1	1	1	1	1	1	0	1	1	1	1	1	4	4	1	1	2	4	3	3	3	2	1	2	1
1	4	2	2	2	2	4	3	2	3	3	5	3	2	3	2	3	4	1	1	0	0	1	1	1	1	1	0	1	1	1	1	1	4	4	4	4	4	4	4	4	4	4	2	2	2
4	3	2	1	3	4	5	3	3	3	5	4	4	4	4	4	5	4	1	0	1	0	0	0	1	1	0	0	1	1	1	1	1	4	3	2	2	4	4	3	4	4	3	2	1	1
1	3	5	3	3	4	2	3	4	2	2	3	4	2	3	3	2	5	1	0	1	0	1	0	0	0	0	1	1	1	1	1	1	4	4	3	4	4	4	4	3	4	4	1	2	1
1	3	3	3	3	4	1	1	5	1	2	4	3	3	3	3	3	3	1	1	1	1	1	1	1	1	1	1	1	1	1	1	1	4	4	4	4	4	4	4	4	4	4	2	2	1
2	2	3	4	4	3	2	2	3	2	4	5	4	2	3	3	2	4	1	1	1	0	1	1	0	1	0	1	1	1	1	1	1	4	4	3	4	5	5	5	5	4	4	1	2	1
1	3	5	2	2	3	2	2	3	1	3	4	2	2	2	2	3	4	1	1	1	1	1	1	1	1	1	1	1	1	1	1	1	4	4	4	4	4	3	4	3	4	3	2	2	1
2	2	3	1	3	4	3	3	3	3	3	5	1	5	5	3	5	3	1	1	1	1	1	1	0	1	1	1	1	1	1	1	0	4	3	3	3	3	3	3	3	3	3	1	1	1
1	2	2	5	5	4	5	5	1	5	5	5	1	5	4	4	5	3	0	0	1	1	1	1	0	1	1	1	0	1	0	0	0	4	4	3	3	4	4	5	4	4	4	1	2	1
2	5	5	2	3	3	2	2	2	1	3	4	3	3	2	3	3	4	1	1	1	0	1	1	1	1	1	1	1	1	1	1	0	4	4	3	4	4	4	4	4	4	3	2	1	1
3	4	3	2	2	2	2	2	4	2	4	2	4	2	2	2	3	4	1	1	1	1	1	1	1	1	1	0	1	1	1	1	1	5	5	5	4	3	4	4	5	4	3	1	2	1
1	1	2	2	2	4	2	2	3	2	2	3	4	2	2	2	2	4	1	1	1	0	1	0	0	1	1	0	1	1	0	0	1	3	3	3	3	3	3	3	3	3	3	1	1	1
2	2	3	5	5	5	5	5	5	2	5	5	5	5	5	5	5	5	0	0	0	0	0	0	0	0	0	1	0	0	1	1	0	3	2	1	3	1	2	1	1	3	3	2	1	1
2	4	3	3	2	4	2	2	4	2	2	2	4	2	2	2	2	4	1	1	0	0	1	0	1	1	1	0	1	1	1	1	0	3	4	3	4	4	4	3	3	3	3	2	1	1
3	3	5	2	2	2	3	2	5	3	2	5	3	1	2	2	2	3	1	1	1	1	1	1	1	1	1	0	1	1	1	1	1	4	4	4	4	4	4	4	4	4	3	2	1	1
2	2	5	2	5	5	3	5	1	5	5	5	1	5	5	5	5	1	1	1	0	1	1	1	1	1	1	1	1	1	1	1	0	5	5	4	4	4	4	4	3	3	4	1	1	1
2	3	3	2	3	4	4	4	3	3	3	3	3	3	3	4	4	3	1	1	1	0	1	1	0	1	1	1	1	1	1	1	1	4	4	4	4	4	4	4	4	4	4	2	1	1
2	3	5	2	2	2	5	2	2	2	5	5	3	3	4	3	4	3	1	1	0	0	0	0	0	0	0	1	1	0	1	1	0	4	4	2	3	3	4	4	4	4	3	1	1	1
2	3	3	2	2	4	3	1	4	3	4	4	3	2	3	2	4	4	1	1	1	1	1	1	1	1	1	0	1	1	1	1	1	3	3	2	3	2	4	3	4	4	3	2	1	1
5	3	2	2	2	5	2	3	4	2	5	5	5	2	5	2	5	5	1	1	1	1	1	0	1	0	1	1	1	1	1	1	1	3	2	1	2	1	3	2	3	3	3	2	2	1
1	1	1	2	4	5	3	3	3	3	4	4	5	3	4	3	4	5	1	1	1	1	1	1	1	1	1	1	1	1	0	0	1	4	4	4	4	4	4	4	4	4	4	2	1	1
3	4	3	3	3	4	4	3	4	1	4	4	4	4	4	2	4	5	1	0	1	1	1	0	0	0	0	0	1	0	1	1	0	4	3	2	3	3	3	2	3	4	2	2	2	1
1	3	2	2	4	4	4	4	5	2	4	3	3	3	3	2	3	4	0	0	0	0	1	0	0	0	0	1	0	0	1	1	0	4	3	3	3	3	3	3	3	3	3	2	2	2
2	3	2	2	2	4	2	2	4	3	3	4	3	3	3	3	4	3	1	1	1	1	0	0	1	1	1	1	1	1	0	0	1	3	3	2	2	2	3	3	3	3	2	2	3	2
2	3	1	2	3	5	3	2	5	2	3	4	5	2	2	3	4	5	0	0	0	0	0	1	0	0	0	1	0	1	1	1	0	4	3	2	3	3	4	2	3	3	3	2	1	1
5	4	2	2	4	5	2	1	5	1	4	4	5	4	1	4	4	5	0	0	0	0	0	0	0	0	0	1	0	1	0	0	0	4	4	2	2	2	4	2	2	4	2	2	3	2
1	2	3	2	2	4	2	2	3	3	2	2	3	2	2	2	2	3	1	1	0	1	1	1	1	1	1	1	1	1	1	1	1	4	4	3	4	4	4	5	4	4	4	2	3	2
1	4	2	3	3	3	4	5	2	4	5	4	1	5	4	4	3	2	1	1	0	1	1	1	1	1	1	1	1	1	0	0	0	4	5	4	4	5	4	4	5	5	4	1	3	1
1	3	1	4	5	5	5	4	1	4	5	4	5	5	5	4	5	2	1	0	0	0	0	0	1	0	0	1	1	1	1	1	0	4	4	5	4	5	4	5	3	4	3	2	2	2
2	3	2	2	2	3	3	2	2	2	3	3	4	1	3	1	3	3	1	1	1	1	1	1	1	1	1	0	1	1	1	1	1	4	4	4	5	4	4	4	5	5	4	2	3	2
1	3	3	2	4	3	4	2	4	3	3	3	4	3	1	2	4	4	1	1	0	1	1	1	0	1	1	1	1	1	1	1	1	4	4	3	4	4	4	4	4	4	3	2	2	1
1	2	2	4	2	4	3	2	4	2	3	2	5	3	2	2	2	5	1	1	0	1	1	1	0	0	1	1	1	1	0	0	0	1	1	1	1	1	1	1	1	1	1	2	1	1
2	3	5	3	4	3	4	4	3	2	5	4	4	3	4	3	4	4	1	1	1	1	1	1	1	1	1	1	1	0	1	1	1	4	3	3	3	2	4	3	4	4	3	2	3	2
4	5	5	2	3	3	2	3	3	2	3	3	4	3	3	3	4	3	1	1	1	1	1	1	1	1	1	1	1	1	1	1	1	4	3	3	4	4	4	4	4	4	3	1	1	1
4	4	2	3	3	3	3	3	3	3	4	2	3	3	3	3	3	3	1	1	1	1	1	1	1	1	1	0	1	1	1	1	1	4	3	3	4	3	3	4	4	4	3	1	1	1
2	3	3	1	1	1	2	1	2	2	3	2	2	2	3	1	4	3	1	1	1	0	1	1	0	1	1	0	1	1	1	1	0	3	3	2	3	3	4	4	2	3	2	2	3	2
1	2	1	1	2	4	1	2	4	2	4	4	5	4	2	4	4	2	1	1	1	0	1	1	1	1	1	1	1	1	0	0	0	4	4	4	5	5	5	5	4	4	5	2	2	1
5	2	3	3	5	2	4	4	2	5	5	5	2	2	5	2	4	1	1	1	0	0	1	0	1	1	1	1	1	1	0	0	0	4	2	4	2	5	3	5	4	4	2	1	2	1
4	3	3	4	5	2	4	5	1	4	4	4	2	3	5	2	4	2	1	1	0	1	1	1	1	1	1	1	1	0	0	0	0	4	4	3	5	3	5	4	5	3	4	2	1	1
3	2	3	4	4	2	5	4	1	5	3	3	4	1	4	3	4	2	1	1	0	1	1	1	0	1	0	1	0	1	0	0	1	4	2	4	4	4	4	5	4	5	4	1	2	1
2	2	3	4	3	1	3	5	1	4	4	5	2	3	4	3	4	4	1	1	0	1	1	1	0	1	1	0	0	1	1	1	1	4	5	4	5	5	5	3	2	2	2	2	2	1
3	1	4	4	5	1	5	4	2	4	2	5	2	4	5	2	4	2	0	0	0	0	1	0	0	1	0	1	0	0	0	0	1	5	5	4	4	4	5	4	4	4	2	1	3	2
2	3	4	4	5	3	5	4	2	5	5	5	2	4	3	2	4	1	1	1	1	1	1	1	0	1	1	1	1	1	0	0	0	3	3	5	4	5	5	5	4	5	5	2	1	2
4	2	1	5	3	2	4	5	1	5	2	5	3	4	4	5	5	1	1	0	1	0	1	1	0	1	1	1	1	1	1	1	1	5	5	4	5	5	4	3	4	4	2	1	3	2
2	3	2	4	5	2	5	4	1	3	2	3	5	4	2	3	5	1	0	1	0	1	1	1	1	1	1	1	1	1	0	0	0	4	4	5	3	3	4	3	5	4	5	2	3	2
1	3	3	4	5	2	4	5	1	4	5	5	4	1	5	2	4	1	1	1	0	1	0	0	1	1	0	1	0	1	0	0	0	5	4	4	4	3	5	4	5	5	5	2	1	1
1	1	1	3	5	1	2	4	3	5	5	5	2	4	4	2	3	2	1	1	0	1	1	1	1	1	1	0	1	1	0	0	0	5	4	2	4	5	4	4	4	4	3	1	3	2
4	2	3	4	5	2	5	3	2	4	4	5	5	2	3	3	4	2	0	1	0	1	1	1	1	1	0	1	1	1	0	0	0	5	5	5	4	4	5	5	5	5	2	2	3	2
3	4	3	3	5	2	4	5	2	4	4	4	3	3	5	3	4	2	1	0	1	1	1	1	0	1	1	1	1	1	0	0	0	4	5	4	4	5	4	3	4	5	4	2	3	2
3	5	4	4	5	1	2	3	4	4	4	5	3	4	5	2	4	2	0	1	0	0	1	1	0	1	0	0	1	1	0	0	0	4	5	5	4	4	5	5	4	4	3	2	1	1
4	2	4	3	5	2	5	3	1	4	5	5	3	5	4	1	5	1	0	1	0	1	0	1	1	1	0	0	1	1	1	1	0	5	5	5	4	4	5	4	5	4	4	2	3	2
3	2	4	4	4	1	2	4	3	5	5	2	2	3	1	5	4	2	1	1	0	0	0	0	0	0	0	1	1	1	0	0	1	5	5	5	4	5	4	4	5	4	4	2	1	1
3	4	3	4	5	2	5	2	1	5	5	3	4	5	2	2	4	4	1	0	0	0	1	1	0	0	1	1	1	1	0	0	0	4	4	4	5	4	3	4	4	4	2	1	3	2
3	3	4	4	2	1	5	4	2	3	2	5	5	3	5	4	4	1	1	0	0	1	1	1	1	1	1	1	1	1	0	0	0	4	4	5	4	5	5	4	4	4	2	2	2	1
2	3	1	2	4	4	2	4	3	4	5	5	5	5	4	2	4	2	1	0	0	1	1	0	0	0	1	0	0	1	0	0	1	5	5	5	4	4	5	3	1	4	2	2	2	1
1	3	3	3	3	1	4	4	3	4	5	5	3	2	5	2	4	3	1	1	0	0	1	1	1	1	1	1	0	1	0	0	0	4	5	4	4	5	4	4	3	5	3	1	3	2
4	2	4	4	4	2	4	5	1	5	5	3	4	3	2	2	2	4	0	1	0	1	1	1	1	0	1	1	1	1	1	1	0	2	4	2	4	4	5	4	4	4	3	2	1	1
4	3	2	4	5	2	4	4	3	4	4	4	3	2	5	4	5	2	0	1	1	1	0	1	1	1	1	0	0	1	0	0	0	2	3	3	2	2	5	4	5	2	2	1	3	2
3	3	1	4	3	1	5	4	2	4	5	2	1	4	3	3	3	3	1	1	0	1	0	0	1	1	1	0	0	1	0	0	1	4	5	5	4	5	4	5	4	4	3	2	1	1
1	4	4	3	3	1	5	4	1	4	2	5	2	1	4	2	3	2	1	1	0	1	1	0	1	1	1	1	1	1	0	0	0	4	5	4	5	4	4	4	4	4	1	1	2	1
4	3	4	5	4	1	4	4	2	4	4	5	2	3	5	4	2	3	1	1	0	0	1	1	1	1	0	1	1	1	0	0	1	5	2	3	5	4	4	5	3	4	3	2	1	1
3	4	4	2	4	2	4	4	1	4	4	5	4	2	1	2	5	1	1	0	0	0	0	1	1	1	0	0	1	1	1	1	0	4	5	3	4	5	4	5	5	4	4	1	1	1
3	4	2	4	5	2	5	4	1	4	5	3	3	4	3	1	4	2	1	1	0	1	1	1	0	1	1	1	0	0	0	0	0	4	3	5	4	3	4	2	5	4	5	1	1	1
3	4	3	4	5	4	4	4	1	4	5	5	3	4	4	2	4	1	1	1	0	1	0	1	1	1	1	1	0	1	0	0	1	5	5	4	3	5	4	4	4	5	1	1	1	2
4	4	1	5	5	2	5	4	1	5	5	5	5	4	4	4	4	2	1	0	0	1	0	1	1	0	1	1	1	1	1	1	0	4	3	2	4	5	5	3	5	2	2	1	1	2
1	2	5	2	4	2	4	4	1	4	5	2	2	1	2	2	5	2	1	1	1	0	1	1	0	1	0	1	1	1	0	0	0	5	5	4	4	5	5	4	4	4	4	2	1	1
1	4	3	5	5	1	4	5	3	2	4	5	4	2	1	3	5	1	0	1	0	1	1	1	0	0	0	1	0	1	0	0	0	5	3	5	4	2	5	4	4	4	3	2	1	2
4	2	2	5	3	2	4	4	2	4	4	4	2	5	5	4	5	2	1	1	0	0	1	1	0	1	1	0	1	0	0	0	0	3	4	4	5	5	2	5	4	4	3	1	1	1
4	2	4	4	5	2	4	4	2	4	5	4	3	3	3	4	5	3	0	1	0	1	1	1	1	1	1	1	0	1	0	0	0	4	4	4	3	2	4	4	5	5	2	1	1	2
2	4	4	5	4	2	5	4	1	4	5	4	2	2	4	3	4	2	1	1	0	1	0	1	1	1	0	1	1	1	0	0	0	4	5	4	4	2	5	3	4	4	2	2	3	2
2	4	4	4	5	1	2	5	2	4	5	5	3	4	5	4	3	1	1	1	0	1	1	1	1	1	1	1	1	1	1	1	1	5	3	4	5	5	4	4	4	3	3	2	1	2
3	2	5	4	5	2	5	5	1	4	5	4	4	5	5	3	4	2	1	1	0	0	1	1	0	0	1	1	1	0	0	0	1	5	5	4	4	5	5	4	3	5	3	2	3	2
1	2	5	3	5	2	3	4	1	3	5	5	4	4	5	2	4	2	0	1	0	1	1	1	0	1	0	0	1	1	0	0	0	4	4	5	5	4	4	5	5	4	2	1	3	2
2	2	3	4	4	1	4	5	1	4	5	3	3	2	1	2	5	2	0	0	0	1	1	1	0	1	1	1	1	1	0	0	0	5	5	4	5	4	4	4	4	4	3	1	1	1
3	1	4	4	5	1	5	4	2	5	3	5	3	3	2	2	2	2	1	1	0	1	0	1	1	1	1	1	0	1	1	1	1	4	5	4	5	4	4	4	5	4	4	2	2	2
2	3	5	4	2	2	3	4	4	4	4	5	4	1	5	4	5	3	1	1	0	1	0	1	0	1	1	1	0	1	0	0	0	4	4	5	4	5	5	4	4	4	2	2	3	2
1	3	4	4	4	3	4	4	1	4	4	5	2	4	5	2	3	2	1	1	0	1	0	0	1	1	1	1	1	1	1	1	1	4	5	2	5	4	5	4	4	4	3	1	3	2
2	2	3	2	3	1	5	5	3	5	5	5	1	4	5	4	4	1	1	1	1	1	0	1	1	1	0	1	0	1	0	0	0	5	5	4	5	2	5	3	3	4	2	2	1	1
4	4	4	3	4	2	5	3	2	4	4	5	4	1	5	1	4	2	1	1	0	0	1	0	1	0	1	0	1	0	0	0	0	5	2	5	4	2	4	4	4	5	3	2	1	1
2	2	2	4	4	2	5	2	1	4	4	5	5	3	1	3	3	2	1	1	0	0	1	1	1	1	1	1	1	1	0	0	0	5	5	3	5	3	4	3	5	4	2	1	2	1
3	4	2	5	4	2	2	5	1	4	4	4	4	1	4	3	4	3	1	0	0	1	0	1	1	1	0	1	1	1	0	0	0	5	4	5	3	5	4	4	5	4	2	1	1	1
4	3	2	3	5	1	4	4	1	5	5	2	4	3	4	3	3	2	1	0	0	1	0	0	1	0	1	0	1	1	0	0	0	4	4	4	4	2	4	5	4	4	5	2	1	1
4	1	1	4	5	4	5	4	1	3	5	2	1	5	4	1	3	1	1	1	1	1	1	1	0	1	1	1	0	1	0	0	0	5	5	4	4	5	4	3	5	4	5	2	1	1
3	5	3	4	5	1	4	4	2	5	5	4	1	1	5	3	4	2	0	1	0	0	1	0	0	1	0	1	1	1	0	0	0	3	5	5	4	5	4	4	4	4	1	1	1	1
3	2	3	4	5	1	5	4	1	2	5	4	5	3	4	3	4	1	0	0	0	0	1	1	1	1	0	0	0	1	0	0	1	4	4	4	5	4	4	5	4	2	2	1	2	1
3	3	1	5	3	2	4	4	1	5	5	4	2	1	4	2	4	2	1	1	1	1	1	1	1	1	1	1	1	1	1	1	0	4	5	5	4	3	3	4	4	4	1	1	1	1
2	3	3	5	3	3	5	4	1	5	5	3	4	2	5	4	4	1	1	0	1	1	1	1	1	1	1	1	1	1	0	0	0	5	5	4	4	4	4	4	4	4	5	2	1	1
3	3	3	2	4	1	5	5	2	4	5	5	3	4	5	2	5	1	1	0	0	1	1	1	0	1	1	1	1	1	1	1	0	5	5	2	5	2	5	4	5	3	2	2	1	1
2	1	3	5	3	1	5	5	2	4	3	3	4	3	5	3	4	2	0	0	0	1	1	0	1	1	0	1	0	0	0	0	1	4	4	4	4	2	4	4	5	4	3	1	2	1
2	4	5	4	5	2	5	4	1	4	3	5	4	4	5	4	4	2	0	1	0	0	1	1	1	1	1	1	1	1	0	0	0	5	5	5	5	3	4	3	5	4	2	2	1	1
3	4	3	5	4	2	4	4	3	5	5	4	3	3	4	3	3	1	0	1	0	0	1	1	1	1	1	1	1	0	0	0	0	4	4	5	2	4	5	4	5	4	4	2	1	1
2	3	2	2	4	1	4	3	4	4	4	4	1	2	3	2	4	2	1	1	0	1	1	1	0	1	1	1	1	1	1	1	0	5	5	5	4	5	5	4	5	3	3	2	2	1
1	5	2	3	2	4	2	2	3	3	3	3	2	2	3	3	3	3	1	1	1	1	1	1	1	1	1	1	1	1	0	0	0	4	4	3	3	3	4	4	3	4	4	2	1	1
1	2	5	1	4	5	3	1	3	1	4	4	4	4	3	4	4	5	1	1	1	1	1	1	1	1	1	0	1	1	1	1	1	4	4	3	3	3	4	4	3	4	3	2	3	2
2	2	5	1	2	3	4	3	4	1	3	5	3	3	4	3	5	4	1	1	1	1	1	1	1	1	1	1	1	1	1	1	1	5	4	4	3	4	5	4	3	4	3	2	3	2
2	2	1	3	5	4	4	3	4	4	5	5	2	5	4	5	5	4	1	0	1	1	0	0	0	1	1	1	0	0	1	1	1	5	3	5	4	4	4	4	5	4	3	1	1	2
2	2	3	4	5	4	5	4	4	4	3	5	2	4	4	5	3	4	0	0	0	0	0	1	0	1	0	1	0	0	1	1	0	5	5	4	5	3	4	5	5	5	3	2	2	1
4	2	5	2	2	1	3	2	2	1	1	2	4	1	1	2	2	2	1	0	1	1	0	1	0	1	1	0	0	1	0	0	1	1	2	2	3	1	2	2	2	2	1	1	3	2
2	3	2	3	5	5	4	3	5	5	5	3	3	5	4	4	4	5	0	0	1	1	0	0	1	0	0	0	0	0	1	1	1	5	5	5	4	5	4	5	3	4	4	2	2	1
1	3	2	1	2	2	3	1	2	1	2	3	3	2	2	1	1	2	1	0	0	0	1	0	1	0	0	1	1	1	1	1	1	1	3	3	2	2	2	2	1	2	3	1	3	2
2	3	3	4	4	5	4	5	5	4	3	5	2	5	4	4	4	5	0	0	0	1	1	1	1	0	1	0	1	1	1	1	0	4	4	5	5	4	5	3	4	5	4	2	1	2
1	2	2	4	4	5	5	5	4	3	5	5	2	4	4	5	5	4	0	0	0	0	1	1	0	1	1	0	0	1	0	0	1	5	3	5	5	5	5	5	4	5	5	2	2	1
1	1	4	1	2	2	2	2	2	1	2	3	4	2	1	2	2	1	0	0	1	1	0	1	0	0	1	1	0	1	0	0	0	2	3	1	1	1	1	1	1	1	3	1	3	2
5	2	3	3	5	5	3	4	3	3	4	4	1	4	4	3	3	5	0	1	0	0	0	1	0	1	0	0	0	0	0	0	1	4	5	5	3	4	5	5	4	5	4	1	2	1
3	2	1	4	4	4	5	5	5	5	4	3	2	4	5	5	5	5	0	0	0	1	0	1	0	0	0	1	1	0	0	0	0	4	5	4	4	4	5	5	4	4	4	1	2	1
3	2	2	1	2	1	3	2	2	2	1	1	5	2	2	1	1	2	1	1	0	1	1	0	0	1	1	1	0	0	0	0	1	2	2	2	3	2	1	3	3	1	1	2	3	2
1	2	2	5	4	5	3	5	4	4	4	5	1	4	4	5	4	4	1	0	1	1	1	0	0	0	1	0	0	0	1	1	0	4	4	3	4	5	4	4	4	4	4	1	1	1
3	1	2	3	2	1	2	1	2	2	1	2	3	1	1	3	1	1	1	1	1	1	0	1	1	1	0	1	1	1	0	0	0	2	1	3	2	1	3	1	1	2	1	1	3	2
3	2	4	4	5	4	3	4	5	5	5	5	1	4	4	5	3	4	1	1	1	1	1	1	1	0	1	1	1	1	0	0	0	4	5	4	3	4	5	5	3	4	4	1	2	1
5	4	1	2	1	1	1	3	2	3	1	1	5	2	2	3	2	1	1	1	0	0	1	0	0	0	1	1	1	1	1	1	0	2	1	1	1	1	1	1	1	2	2	2	3	2
2	1	2	5	5	5	5	5	5	5	5	4	2	3	4	4	5	5	0	1	0	1	1	0	0	0	0	1	0	0	0	0	0	3	4	3	4	4	5	5	4	4	4	2	1	1
4	3	4	5	5	4	5	5	5	5	5	4	1	4	4	5	3	4	1	0	0	0	0	0	0	0	1	0	0	0	1	1	1	5	4	4	4	4	5	5	5	5	5	1	2	1
1	2	1	4	3	4	5	5	4	5	4	4	3	4	5	4	3	4	0	1	1	1	1	1	1	0	1	1	0	0	0	0	1	5	5	5	5	4	5	5	4	4	4	1	2	1
2	3	3	4	5	4	5	5	4	4	3	4	3	3	3	3	5	3	1	1	1	1	0	0	0	1	0	1	1	1	0	0	1	3	5	4	4	5	4	5	4	3	4	1	1	1
1	4	2	4	4	4	5	5	4	3	4	4	1	4	4	5	3	4	1	1	1	1	1	0	1	1	0	1	0	0	1	1	1	4	4	5	3	5	5	4	5	4	4	1	1	1
3	1	1	4	5	4	5	5	5	4	5	5	2	4	4	5	4	5	1	1	0	1	1	1	0	1	0	0	0	1	1	1	1	4	5	5	5	5	4	5	3	5	5	2	2	2
5	4	1	4	5	4	5	4	5	3	5	4	1	5	5	5	5	3	1	1	0	0	1	0	1	0	1	0	1	0	1	1	1	5	4	4	3	4	5	5	5	5	5	1	2	2
2	3	5	5	5	4	4	4	5	5	4	4	2	4	5	3	4	3	1	1	1	1	1	0	1	0	1	1	1	1	0	0	1	3	4	4	5	5	5	5	3	5	4	1	1	1
4	2	1	3	4	5	4	4	4	3	4	3	1	5	5	4	4	4	1	1	0	0	1	1	0	1	1	1	1	0	0	0	1	4	4	4	5	3	4	4	5	5	5	2	2	2
5	3	2	2	2	3	3	2	1	1	3	2	4	2	2	2	2	1	1	1	1	1	0	0	0	1	0	0	0	0	1	1	1	1	1	2	2	2	1	2	1	1	1	1	3	2
5	3	5	2	1	1	2	2	3	3	1	2	5	1	3	2	2	2	0	1	1	1	1	0	0	0	1	0	1	0	1	1	1	2	3	1	2	1	3	2	2	1	2	2	3	2
1	2	1	4	4	5	3	5	4	4	5	4	1	3	4	3	4	4	0	0	0	0	0	0	0	1	0	0	1	0	0	0	0	4	5	5	5	4	5	4	4	5	4	1	2	1
1	3	5	3	5	3	5	4	5	5	5	4	1	4	4	5	5	4	1	0	1	1	1	1	1	0	1	1	1	1	0	0	0	4	4	3	4	4	4	4	3	5	5	2	1	1
3	2	1	1	3	1	2	2	1	2	2	3	4	2	1	2	1	1	1	0	1	1	1	1	1	1	0	1	0	0	0	0	0	1	2	1	2	1	2	1	2	2	1	2	3	2
1	2	1	5	4	3	4	5	4	5	5	5	1	4	5	3	4	4	0	0	0	1	1	0	1	1	1	0	1	1	1	1	1	5	4	4	3	5	4	4	5	5	5	2	1	1
3	2	3	1	1	2	2	3	2	1	2	1	4	1	3	2	1	2	1	0	0	1	0	1	0	0	1	0	1	1	0	0	1	2	2	2	1	1	3	1	3	2	1	1	3	2
3	2	2	5	4	4	5	5	4	5	5	4	2	5	4	3	5	3	1	0	0	1	0	1	1	0	0	0	1	1	1	1	1	4	3	4	5	4	3	4	3	3	5	1	2	1
3	1	5	4	4	5	5	4	3	4	3	4	1	3	4	5	3	3	0	1	1	1	0	1	0	1	1	0	1	1	1	1	0	5	5	5	4	4	5	4	5	5	5	2	2	1
4	2	4	3	5	4	4	4	4	3	4	3	1	4	5	4	5	4	1	0	0	0	0	0	0	0	1	0	0	0	0	0	0	4	4	5	3	4	5	4	5	4	4	2	1	2
3	3	1	4	5	5	5	4	5	4	3	4	1	5	5	5	5	5	1	0	1	1	1	0	0	1	0	0	1	0	0	0	1	4	5	4	5	5	4	5	5	5	5	2	2	1
3	3	5	3	4	4	4	5	4	5	5	4	2	4	4	5	5	4	1	1	1	0	1	0	1	1	0	0	1	0	0	0	1	4	4	5	5	5	3	5	3	5	5	2	1	2
3	1	3	5	4	5	4	5	4	5	4	5	1	5	4	5	5	5	0	1	1	1	1	0	0	0	0	1	1	1	1	1	1	4	4	4	3	3	5	4	4	4	5	1	2	1
2	5	2	4	5	5	5	4	3	4	4	5	1	3	5	4	4	4	1	0	0	1	1	1	0	0	0	0	0	1	1	1	0	4	4	4	5	5	5	5	5	5	3	2	2	1
1	3	5	1	2	2	1	1	1	1	1	3	4	2	2	2	2	2	0	1	1	0	1	0	1	1	0	0	1	1	0	0	1	2	2	1	3	2	1	1	2	2	2	1	3	2
1	3	2	5	3	5	4	5	4	4	5	4	2	5	5	5	5	5	0	0	1	0	1	0	0	0	0	1	1	1	1	1	0	5	4	5	3	5	5	4	5	5	5	2	1	1
2	4	2	5	3	4	5	5	5	5	5	3	1	5	3	4	4	5	0	0	1	0	0	0	1	1	1	0	0	0	0	0	0	4	4	5	5	5	3	4	5	3	5	1	2	1
4	3	2	3	3	4	5	3	4	4	5	5	2	5	4	4	5	5	1	1	1	1	1	1	0	1	1	1	1	1	1	1	1	5	4	3	4	4	3	4	5	4	3	1	1	1
5	1	2	4	5	3	4	4	5	4	3	5	3	5	5	4	3	5	1	0	1	1	1	0	0	1	0	1	1	0	0	0	1	5	5	4	4	5	5	5	3	5	5	1	1	2
2	1	3	5	4	4	5	4	4	4	5	5	2	4	4	3	4	4	0	1	1	0	0	0	0	1	0	0	1	0	0	0	0	4	5	4	5	5	3	4	5	4	4	2	1	1
1	1	1	4	5	4	3	5	4	4	5	5	1	5	5	5	5	4	0	1	0	0	0	0	0	1	1	1	0	1	0	0	0	4	4	4	4	4	5	3	5	4	5	2	2	1
1	4	5	3	5	5	4	5	4	3	5	5	1	5	4	4	3	5	1	1	1	1	1	1	1	1	0	1	1	1	0	0	1	4	4	4	4	5	4	4	4	5	5	1	1	2
3	2	4	2	2	1	3	1	2	1	2	3	5	1	2	1	2	1	0	1	0	1	1	1	1	1	1	1	1	0	1	1	0	1	2	1	2	2	1	1	2	2	1	2	3	2
2	3	4	5	5	4	5	5	5	5	5	5	2	5	4	4	5	4	1	1	0	0	1	1	0	1	0	0	1	0	1	1	1	5	4	5	5	5	5	3	4	5	4	1	2	1
3	1	2	5	5	3	4	3	4	5	5	4	2	4	3	5	4	3	0	1	1	1	1	0	1	1	1	1	1	1	1	1	1	4	5	5	4	4	4	4	4	4	5	2	1	2
5	1	5	4	5	3	4	4	4	4	5	4	1	5	5	5	5	4	1	1	1	0	0	0	0	1	0	1	1	0	0	0	1	3	4	4	4	5	5	5	5	3	5	2	2	2
5	4	2	1	2	1	3	2	1	2	2	2	5	3	2	3	1	2	1	1	0	1	1	1	0	1	0	0	1	0	1	1	1	1	3	1	2	2	1	2	1	2	2	2	3	2
1	2	2	3	4	4	5	5	4	5	3	5	2	3	4	4	5	4	1	1	1	1	0	0	0	1	1	1	1	0	1	1	1	3	5	4	4	5	4	3	3	4	5	1	1	1
5	4	1	5	4	4	4	4	5	5	4	4	2	4	3	5	5	4	1	1	1	1	0	1	0	1	0	0	0	1	1	1	0	5	5	5	3	5	5	5	4	5	5	2	1	1
1	3	5	2	4	3	3	2	3	2	5	4	3	2	3	3	3	3	1	1	1	0	1	1	1	1	1	1	1	1	0	0	0	4	2	4	3	4	4	4	3	4	3	2	3	2
3	4	2	1	1	2	1	1	2	1	2	2	2	1	1	1	2	2	1	1	1	1	1	1	1	1	1	1	1	1	1	1	0	4	4	4	4	4	4	4	4	4	4	2	3	2
2	3	3	4	4	4	5	4	4	4	5	5	3	5	4	5	5	4	1	1	1	1	1	1	1	1	1	1	1	1	0	0	0	5	4	3	4	4	5	5	5	4	5	2	3	2
2	3	3	3	4	4	4	3	4	4	4	4	3	3	4	4	4	4	1	1	1	1	1	1	1	1	1	1	1	1	1	1	1	4	2	3	3	2	3	4	4	4	2	2	1	1
1	2	1	4	4	5	5	4	2	2	5	5	5	2	4	4	4	5	0	0	0	0	0	0	0	0	0	0	0	0	1	1	0	4	4	4	4	4	4	4	4	4	2	2	1	1
1	3	3	3	3	5	5	3	3	3	5	5	5	4	3	4	5	5	1	1	1	0	1	0	0	1	1	0	1	1	1	1	1	4	3	2	3	3	4	3	3	4	3	2	1	1
2	2	5	2	2	4	1	2	3	1	2	2	3	2	2	1	1	4	1	1	1	0	1	1	0	1	1	1	1	1	1	1	0	4	5	4	3	3	4	4	4	4	3	2	1	1
1	3	5	3	4	5	5	5	5	4	5	3	5	5	4	5	4	5	1	1	1	0	0	0	0	0	0	1	1	0	0	0	0	3	3	2	3	3	3	2	3	2	2	2	2	1
1	2	3	1	2	4	2	2	4	1	2	2	4	1	1	1	2	4	0	0	1	0	0	0	0	0	0	0	1	1	1	1	1	4	3	2	2	2	3	3	3	3	3	1	2	1
3	2	3	2	4	3	3	3	4	3	3	4	2	1	2	3	4	4	1	0	1	1	0	1	0	0	0	1	0	0	0	0	1	4	2	2	3	2	4	3	2	4	2	1	3	1
3	2	1	3	3	5	4	4	5	3	4	5	5	4	2	2	4	5	0	0	0	0	0	0	0	0	0	0	1	1	0	0	0	3	3	1	2	2	4	4	4	4	2	2	2	1
1	1	1	2	2	5	2	3	5	2	3	3	4	2	4	4	3	3	1	1	1	1	1	1	1	1	1	1	1	1	1	1	0	4	4	4	3	4	4	3	3	4	3	2	2	1
2	3	3	2	2	4	2	2	4	2	2	2	4	2	2	2	2	4	1	1	0	1	1	0	0	0	0	1	1	1	0	0	0	4	2	2	4	2	4	4	2	2	2	2	2	1
2	3	3	2	3	3	4	4	3	4	3	3	2	4	5	4	3	2	1	0	1	1	1	0	0	0	0	0	1	1	1	1	1	3	2	4	4	4	3	3	3	3	4	2	2	1
1	3	1	1	2	4	2	1	5	1	2	4	2	1	2	2	2	4	1	1	1	1	1	1	1	1	1	0	1	1	1	1	1	4	4	4	3	3	4	3	3	4	3	2	3	2
4	4	3	1	2	3	4	4	2	1	3	4	2	4	3	3	4	2	1	1	1	1	1	1	1	1	1	1	1	1	0	0	1	4	4	2	3	3	4	4	4	4	3	2	3	2
1	4	5	2	3	4	2	2	4	2	2	2	5	3	2	2	3	5	1	1	0	1	1	1	1	1	1	1	1	1	1	1	1	4	4	4	4	4	4	4	4	4	2	2	1	2
2	3	2	3	4	4	4	3	5	3	3	3	5	4	3	2	2	5	1	1	1	1	1	1	1	1	1	0	1	1	0	0	1	4	4	2	3	3	4	4	3	4	3	2	2	1
1	5	2	2	1	1	1	1	4	1	3	2	2	3	1	1	1	3	1	1	0	1	0	1	1	0	1	1	0	0	1	1	0	2	2	3	2	2	1	1	1	3	4	1	1	1
3	3	4	5	1	2	3	1	2	1	5	2	3	1	1	5	1	3	1	1	1	0	1	0	0	1	1	0	1	1	0	0	0	3	2	1	3	4	3	1	2	1	1	2	1	2
2	2	4	2	5	3	3	2	2	2	2	1	1	3	1	3	2	4	1	1	0	0	0	1	1	1	1	1	0	1	0	0	1	2	1	1	5	5	2	5	2	1	3	1	1	2
2	4	1	1	1	1	3	1	3	1	2	1	2	2	4	3	4	1	0	1	0	1	0	0	0	1	1	1	1	0	0	0	0	3	2	2	2	1	5	3	4	2	2	1	1	2
1	5	2	4	2	3	3	1	4	1	2	5	3	3	1	3	1	3	1	1	0	0	0	1	1	1	1	1	0	1	0	0	0	1	2	5	5	2	1	2	2	3	2	1	2	1
5	2	1	1	2	3	2	1	3	1	5	3	2	3	2	3	1	1	0	0	1	0	0	0	1	1	1	0	1	1	0	0	0	5	1	3	2	3	3	1	1	1	3	1	1	1
5	2	2	1	1	1	3	3	1	3	1	3	3	1	2	5	5	2	1	0	1	0	1	0	1	1	0	1	1	1	0	0	1	1	1	1	1	1	5	1	2	1	1	2	2	2
2	1	4	1	2	1	2	1	1	2	1	3	1	1	1	2	5	1	1	1	0	0	0	0	1	1	1	1	1	0	1	1	0	5	1	3	2	3	1	2	3	1	1	1	3	2
1	3	5	4	2	2	2	1	5	2	1	3	3	3	1	3	3	1	1	1	0	0	0	1	1	1	1	0	1	1	1	1	0	5	1	3	3	4	1	1	1	2	1	2	2	2
4	1	4	1	1	1	1	3	2	1	1	3	2	2	2	3	2	1	1	1	0	0	1	1	0	1	1	0	1	1	0	0	0	1	1	1	3	1	3	2	2	1	1	2	2	1
2	4	2	1	5	2	1	1	1	1	1	3	2	2	3	3	1	1	0	1	0	0	0	1	1	1	1	1	0	0	0	0	1	2	2	3	1	1	2	2	3	2	5	2	3	2
5	3	1	1	2	1	2	3	2	3	1	1	1	4	1	2	2	3	1	1	0	0	1	1	1	1	1	0	1	0	0	0	0	2	1	2	3	4	1	3	2	3	2	1	2	1
1	2	2	1	1	3	5	5	2	3	1	2	1	4	1	3	4	1	1	0	1	0	1	1	1	1	1	1	0	0	0	0	0	2	5	1	1	5	2	1	2	2	2	2	3	2
3	2	3	1	1	2	1	2	4	3	2	1	1	1	2	5	5	1	1	0	0	0	1	1	1	1	1	1	1	0	1	1	1	3	3	3	2	3	1	2	1	5	3	1	1	2
3	1	3	3	2	2	5	1	2	4	1	4	3	2	3	2	3	1	0	1	1	0	0	0	1	0	1	1	1	1	0	0	0	2	1	1	1	2	2	4	4	3	2	1	3	2
5	1	3	1	3	1	1	3	1	5	2	1	3	1	1	2	2	4	0	1	0	0	1	1	1	0	1	1	1	0	1	1	1	2	2	3	3	1	2	1	1	1	4	1	3	2
4	1	4	3	1	1	2	3	1	1	2	3	2	4	2	1	1	1	1	1	0	1	1	1	1	0	1	1	0	1	0	0	0	5	2	2	2	2	1	2	1	1	2	2	3	2
3	3	1	2	2	2	2	2	1	1	3	5	3	3	3	2	1	3	1	0	1	1	1	1	0	1	1	1	0	1	0	0	0	2	5	1	5	2	3	3	1	3	1	2	1	1
3	2	3	3	3	2	5	2	2	4	1	4	2	2	2	3	4	5	1	1	0	1	1	1	1	1	1	1	1	1	0	0	0	1	1	4	2	4	4	1	3	5	2	2	3	2
2	2	3	2	1	1	1	1	1	4	2	1	1	4	3	5	1	3	1	1	1	0	0	1	0	1	1	1	1	0	0	0	0	2	3	3	1	2	3	1	3	3	1	2	3	2
4	2	5	1	2	1	1	1	2	1	3	2	3	2	2	1	1	1	0	1	0	0	0	1	1	0	1	1	0	0	1	1	1	2	1	1	1	1	4	1	4	1	2	1	1	2
1	3	2	1	5	1	3	2	3	1	2	5	2	2	2	1	4	2	1	1	0	0	1	1	1	1	1	1	0	1	0	0	0	2	1	2	2	1	3	3	4	2	2	2	1	1
2	1	3	1	2	3	5	1	2	2	2	1	3	1	3	5	2	1	1	1	1	0	1	1	1	0	0	1	1	1	0	0	0	3	3	1	3	3	1	1	2	1	3	1	1	1
2	3	1	4	5	5	5	5	4	3	4	4	3	4	5	4	5	5	1	0	0	1	1	1	0	1	1	1	1	1	1	1	1	5	5	5	4	5	4	4	4	4	5	2	3	2
4	4	2	2	3	5	3	2	1	3	3	3	1	3	2	3	3	2	0	0	1	0	1	0	1	1	1	1	0	1	0	0	1	1	5	3	1	1	3	3	1	2	3	1	1	2
4	4	3	5	5	4	5	5	5	3	4	4	5	5	3	5	4	4	0	1	0	1	0	0	1	1	1	1	0	1	0	0	1	5	5	4	4	4	4	5	5	4	5	2	3	2
2	2	1	5	1	1	5	4	2	3	2	1	2	1	2	3	2	1	1	1	0	0	1	0	0	1	1	1	1	0	0	0	1	3	1	2	3	4	1	4	2	2	1	1	2	2
2	3	4	5	4	3	5	5	4	4	3	5	3	5	4	4	4	4	0	1	0	1	1	1	1	1	1	0	1	1	0	0	1	5	4	4	3	4	4	3	4	3	5	2	3	2
2	2	3	4	4	4	5	4	5	4	4	3	4	5	5	4	4	4	1	1	0	0	1	1	0	1	0	0	1	1	1	1	0	5	4	5	4	5	5	4	5	4	5	1	1	1
1	2	1	5	4	4	3	5	5	4	4	4	5	4	5	4	4	5	1	1	1	0	1	1	1	1	1	0	1	1	0	0	0	5	4	4	3	5	4	5	5	4	5	2	3	2
2	4	2	5	4	4	5	5	4	5	4	5	5	3	5	4	5	5	1	1	1	0	0	0	0	1	1	1	1	1	0	0	0	4	5	4	4	3	4	5	5	5	4	2	1	1
5	1	3	5	5	3	4	5	3	3	4	5	4	5	4	4	5	5	1	0	1	0	0	1	0	1	1	1	1	0	0	0	0	4	5	3	5	5	4	5	5	4	5	1	1	1
2	5	1	4	5	4	4	4	5	5	4	4	3	5	5	5	5	4	1	1	0	0	1	1	1	1	1	1	0	1	0	0	0	5	3	5	5	4	4	3	4	3	4	1	3	2
2	3	4	4	5	4	5	5	5	5	5	4	4	4	5	4	5	4	0	1	1	0	1	1	1	1	1	1	1	1	0	0	0	5	4	4	4	5	4	5	3	4	4	1	2	1
1	3	2	5	4	5	5	5	4	4	4	4	5	4	5	5	3	5	1	0	1	0	1	1	1	1	1	1	1	1	0	0	0	5	5	4	4	3	5	5	5	3	4	2	3	2
5	1	4	5	3	4	5	3	5	3	3	5	4	3	5	4	4	5	1	1	1	1	1	1	1	1	1	1	1	1	0	0	0	5	4	5	5	4	4	5	5	4	5	1	3	2
1	2	2	5	4	4	4	5	5	4	4	5	5	4	4	4	5	5	1	0	1	1	0	1	1	1	1	1	1	1	0	0	0	5	3	4	4	5	5	5	4	5	5	1	2	2
2	3	3	5	3	5	4	5	4	5	4	3	5	5	5	4	5	5	1	1	0	0	1	1	1	1	1	1	1	1	1	1	0	3	5	5	5	5	4	5	4	5	4	1	1	2
1	2	4	5	4	4	4	5	3	5	4	5	3	5	5	4	5	3	1	1	0	1	1	1	1	0	1	1	0	1	0	0	0	4	5	4	3	5	5	4	5	5	5	2	3	2
3	2	3	5	5	4	4	5	5	3	4	4	4	4	5	4	4	5	0	1	0	0	1	0	1	1	1	1	1	1	0	0	0	5	4	5	5	5	5	5	4	4	5	2	1	1
3	5	4	5	5	4	5	5	5	4	4	5	3	4	5	3	4	5	0	0	1	0	1	1	1	1	1	0	1	0	0	0	0	4	4	5	4	5	4	4	3	4	4	1	3	2
3	1	3	3	3	5	5	3	5	5	4	4	4	5	5	4	5	3	0	1	1	1	1	0	1	1	1	1	0	1	1	1	1	5	5	4	4	5	5	5	4	4	5	1	3	2
2	5	5	4	4	5	4	5	5	3	4	5	4	5	4	5	4	4	1	1	0	0	1	1	0	1	1	1	0	1	0	0	0	4	3	3	3	4	5	5	5	5	4	2	2	2
3	3	3	4	4	5	4	4	5	5	4	5	4	4	4	5	3	4	0	1	0	0	1	1	1	0	1	1	1	1	0	0	0	4	4	5	4	3	3	3	5	5	5	2	3	2
5	4	4	5	5	4	4	5	4	4	4	3	5	3	4	4	5	5	1	1	1	0	0	1	1	1	1	0	1	0	0	0	0	4	4	5	4	5	4	3	5	3	4	2	1	1
2	4	1	4	5	4	5	3	4	5	4	4	3	5	4	4	5	4	1	1	0	0	0	1	1	1	1	1	1	1	0	0	0	5	5	4	4	5	4	4	3	5	3	1	3	2
2	4	3	4	4	4	3	4	5	5	5	4	3	5	4	3	5	3	0	1	1	1	0	1	1	0	1	1	1	1	0	0	1	5	4	4	4	5	5	4	5	4	5	1	3	2
3	4	3	4	5	4	4	5	5	5	3	5	5	5	5	4	5	5	1	0	0	0	0	0	1	1	1	1	1	1	1	1	0	4	3	4	4	5	4	4	3	4	5	2	2	2
3	3	3	5	5	5	5	4	5	5	4	5	4	4	5	4	4	4	0	1	0	0	0	0	1	0	1	1	1	1	0	0	0	4	4	4	3	4	4	4	5	4	5	2	3	2
3	3	4	5	5	4	4	5	4	3	4	5	4	4	4	3	4	4	1	1	0	0	1	0	1	0	0	1	0	1	0	0	1	5	4	4	4	4	3	4	4	4	5	2	1	1
3	3	4	4	4	5	5	5	5	5	4	4	4	5	5	3	4	5	1	1	0	0	0	1	1	1	1	0	0	1	0	0	1	5	4	5	5	5	5	4	5	5	5	1	3	2
2	5	5	5	5	5	4	4	5	4	4	4	4	5	5	4	5	5	1	1	1	1	1	1	1	0	1	0	1	1	0	0	0	3	4	5	4	4	3	3	3	4	4	2	2	1
4	3	2	3	5	4	5	5	5	5	4	5	4	5	5	4	4	5	0	1	1	0	1	0	1	1	1	1	1	1	0	0	1	4	4	4	5	4	3	5	5	5	4	2	3	2
2	4	3	5	3	4	5	5	3	5	5	3	4	4	4	4	3	5	1	1	0	1	0	1	0	1	1	1	0	1	0	0	0	3	5	5	4	5	4	4	5	3	4	1	1	1
3	3	3	5	3	4	5	5	5	5	4	5	5	5	4	4	4	4	1	1	1	0	0	1	1	1	0	1	0	1	1	1	0	5	4	5	4	5	5	3	5	4	5	2	2	1
4	1	3	5	4	4	4	5	5	5	4	5	5	5	5	5	5	4	0	1	1	0	1	1	1	1	1	1	1	1	0	0	1	4	4	5	5	4	5	5	4	3	4	1	3	2
2	2	3	5	4	4	3	5	5	5	4	4	4	5	4	4	5	5	1	1	0	0	0	1	0	1	1	1	1	1	1	1	0	5	4	4	5	4	5	5	5	4	5	1	3	2
4	3	4	4	5	4	4	5	4	4	4	5	5	4	4	5	5	5	1	1	0	0	1	1	0	1	1	1	0	0	1	1	0	4	3	5	4	5	4	3	4	5	4	1	1	1
2	4	4	5	3	3	5	3	3	4	4	3	4	4	5	5	3	5	1	1	0	0	1	0	0	0	1	1	1	0	0	0	0	4	5	4	4	5	4	5	4	4	4	1	3	2
3	4	3	5	4	4	4	3	5	5	4	4	3	4	5	5	5	5	1	0	1	1	1	0	1	1	1	0	1	1	1	1	0	4	4	5	4	4	5	4	5	5	4	2	1	1
3	4	2	4	5	4	3	5	4	5	4	5	5	3	5	4	4	4	1	1	1	1	1	0	0	1	1	0	1	1	0	0	1	5	5	4	5	5	4	4	4	4	5	1	1	2
2	3	2	5	4	4	4	5	5	5	4	5	5	4	4	5	5	5	1	1	1	1	1	1	1	1	1	0	1	0	0	0	0	4	5	5	5	4	5	5	3	3	3	2	2	2
4	2	2	5	5	5	3	5	3	3	4	4	4	5	4	5	3	3	1	1	0	0	1	0	0	1	1	1	1	1	0	0	0	4	5	4	5	5	4	4	5	4	4	2	2	1
1	3	3	4	4	4	3	4	5	4	4	4	4	3	4	5	5	4	1	1	0	1	0	1	1	0	1	0	1	0	0	0	0	4	3	4	4	5	4	3	5	4	5	2	1	1
3	2	1	3	5	5	4	4	5	4	4	5	4	4	5	4	5	4	0	1	0	0	1	1	0	1	1	1	1	0	0	0	0	3	4	4	4	4	4	5	4	5	3	1	2	1
1	4	3	5	4	4	4	3	5	4	4	3	5	3	5	4	3	4	0	1	1	0	1	1	1	0	1	0	0	0	0	0	0	4	4	5	4	4	5	4	4	4	5	1	1	1
4	3	5	4	4	4	3	5	4	5	4	5	4	4	3	4	4	4	0	1	0	0	1	1	1	1	0	0	0	1	0	0	0	5	3	5	4	3	4	4	5	5	5	1	2	2
2	3	2	4	5	5	4	3	4	5	4	4	4	5	5	5	4	4	0	0	0	1	1	1	1	1	1	0	1	1	0	0	0	4	5	4	5	5	5	5	5	4	5	1	1	2
2	4	2	4	4	3	3	3	4	5	5	4	3	5	5	4	5	5	1	0	0	0	1	1	1	0	1	1	0	1	0	0	1	4	3	5	5	5	4	3	4	5	4	1	1	2
3	1	2	4	5	5	5	5	4	4	4	5	5	5	5	5	5	4	0	0	0	1	1	1	0	1	1	1	1	1	1	1	0	5	4	4	4	4	5	3	4	4	5	1	1	2
4	4	2	5	5	4	4	3	3	3	4	4	5	5	5	3	4	5	1	0	1	1	1	1	1	0	1	0	1	1	0	0	1	5	5	5	5	4	5	5	5	4	3	1	1	2
2	1	1	4	4	4	5	3	4	5	4	4	3	5	4	4	5	4	1	1	1	0	1	1	1	1	1	1	1	1	0	0	0	4	5	4	5	3	4	3	5	3	5	1	2	2
4	5	2	3	5	4	3	4	5	5	4	4	4	5	5	3	5	5	1	0	0	1	1	1	1	1	1	1	0	1	0	0	0	4	4	5	4	4	4	5	5	5	5	1	2	1
3	2	2	5	4	4	4	4	3	3	4	4	5	4	5	5	5	5	1	1	1	0	0	0	0	1	1	1	0	1	0	0	0	4	3	5	4	4	4	4	3	3	5	2	1	2
2	2	2	4	4	4	4	5	5	4	3	5	4	5	5	4	4	5	0	0	0	1	0	1	0	0	1	0	1	1	1	1	1	5	5	5	4	4	5	5	5	5	5	1	1	2
2	4	2	5	5	4	4	5	4	5	3	5	4	3	5	4	5	3	1	0	0	1	0	1	1	1	1	0	1	1	1	1	0	4	4	4	4	3	5	4	5	4	4	1	2	1
3	2	3	3	5	5	4	4	4	5	4	4	4	3	4	5	4	5	1	1	0	0	0	1	1	0	1	0	1	0	0	0	0	4	5	5	4	4	4	4	5	3	4	1	1	2
2	1	1	3	3	5	5	4	5	5	4	5	4	4	5	5	5	3	0	1	1	1	1	1	0	1	1	1	1	1	1	1	0	4	4	4	5	5	4	4	4	4	3	2	1	1
1	2	1	5	4	5	4	4	4	4	4	5	4	4	4	5	5	4	1	0	1	1	1	0	1	0	1	1	0	1	0	0	1	5	4	4	5	4	3	3	5	4	4	1	2	1
4	5	3	5	5	5	4	5	5	4	4	5	5	5	5	5	5	5	0	1	0	1	1	0	1	1	1	1	1	1	0	0	0	4	3	5	4	4	5	4	4	4	3	1	1	2
4	4	2	3	4	5	4	4	5	4	3	5	4	5	4	4	5	5	1	1	0	1	0	0	1	1	1	1	1	1	0	0	0	4	5	3	5	4	3	4	3	4	4	2	2	1
2	4	4	5	4	4	4	5	5	4	4	4	4	5	5	5	4	4	1	1	0	0	1	0	1	1	1	0	1	1	1	1	1	4	4	3	4	4	5	5	4	5	5	1	1	2
3	4	2	5	5	4	5	3	5	4	4	4	5	5	3	3	5	5	1	1	0	0	0	0	1	1	1	1	1	1	0	0	0	4	4	4	4	5	4	4	5	4	4	2	1	2
2	3	4	3	4	3	4	3	3	4	5	5	5	3	5	3	4	4	0	0	0	0	1	0	1	0	1	1	1	1	1	1	1	4	5	5	4	3	5	5	5	4	5	1	1	1
4	2	3	5	5	4	4	3	5	3	4	5	5	4	5	4	5	4	0	1	0	1	1	1	0	0	1	0	0	0	1	1	0	5	4	4	5	4	4	5	5	4	5	2	1	1
2	3	5	5	5	5	5	4	5	4	4	4	5	4	5	5	3	4	1	1	0	1	1	1	1	0	1	0	1	1	0	0	1	5	4	4	3	4	3	4	5	4	5	1	1	2
2	5	1	3	2	2	1	2	1	1	3	2	3	4	3	3	2	5	0	1	1	0	1	1	1	1	1	1	0	1	0	0	1	1	1	3	1	1	2	5	4	3	3	1	2	1
3	4	3	1	1	3	1	1	3	4	3	1	5	1	2	2	2	2	1	1	0	0	0	1	0	0	1	0	1	0	1	1	0	1	1	5	1	2	3	3	3	3	3	1	2	1
1	1	2	3	1	3	2	3	1	4	2	1	2	4	2	1	1	1	1	1	1	1	1	1	1	1	1	1	1	0	0	0	0	3	2	2	2	2	2	1	4	2	1	1	2	1
2	3	3	1	1	1	2	1	4	3	3	3	5	4	1	3	2	3	0	1	0	0	1	1	1	1	1	1	0	1	1	1	1	1	3	1	3	3	1	1	1	1	2	2	3	1
1	4	4	1	2	3	5	4	5	2	3	3	3	3	3	3	3	2	1	0	1	0	1	1	1	0	1	0	1	0	1	1	0	3	3	1	1	2	4	1	2	1	1	1	2	1
4	4	1	4	1	1	3	1	1	3	3	4	2	4	2	1	2	1	1	1	0	1	1	1	1	0	0	0	1	0	0	0	0	3	2	1	2	1	2	2	1	1	3	2	2	1
5	1	4	4	2	2	2	3	3	4	5	3	2	1	1	1	4	1	1	1	1	0	1	1	0	1	1	1	1	1	1	1	0	2	3	3	2	2	2	5	2	3	5	1	2	2
5	1	4	3	3	2	3	3	2	1	1	2	2	1	2	5	1	1	1	1	0	1	1	1	1	1	1	1	0	1	0	0	0	1	3	3	3	1	3	2	2	1	4	1	2	1
2	2	2	2	2	1	2	2	1	2	5	2	5	3	4	2	1	1	1	1	0	0	1	1	0	1	1	1	1	0	0	0	0	2	1	2	5	1	2	3	1	3	1	1	3	1
4	2	4	3	2	5	1	4	2	2	2	3	3	1	3	2	1	2	1	0	0	0	0	1	1	1	1	1	1	1	0	0	0	1	3	1	3	1	1	3	1	1	1	1	2	1
3	1	3	5	1	3	1	3	2	3	2	2	1	2	2	1	1	3	1	1	0	1	1	1	1	1	1	1	0	0	1	1	0	3	2	2	1	2	2	2	1	3	2	2	2	2
3	5	3	3	2	1	3	1	2	4	3	2	1	2	1	1	2	2	1	1	1	0	0	1	0	1	1	1	0	0	0	0	1	2	1	2	1	1	3	4	2	2	3	1	3	1
2	5	1	3	1	1	5	2	4	1	5	2	1	1	3	1	3	1	1	1	0	1	0	1	0	1	1	1	1	0	0	0	0	1	1	5	3	2	1	3	2	5	2	1	2	2
3	3	4	1	5	1	1	2	2	5	5	5	2	4	1	2	1	2	1	1	0	1	0	1	0	1	0	1	1	1	0	0	0	1	2	3	1	2	2	2	1	3	2	1	2	1
1	4	2	2	3	1	1	2	2	1	5	1	1	4	2	3	1	3	1	0	1	1	1	1	1	1	1	1	1	1	1	1	0	5	3	1	1	4	3	1	3	1	2	1	2	1
2	4	2	1	1	3	2	3	2	5	5	2	1	1	1	2	1	2	1	1	1	1	1	0	0	0	0	1	1	1	0	0	0	3	3	3	5	4	4	1	4	2	3	1	2	1
3	4	3	5	4	3	5	5	5	5	4	4	4	5	3	5	5	5	1	1	1	1	0	1	1	1	1	1	0	1	0	0	0	5	4	5	4	3	5	5	5	4	5	1	2	1
4	4	3	4	4	3	5	4	5	3	3	3	5	5	5	3	4	4	1	0	0	0	1	1	0	0	1	0	1	1	0	0	0	4	4	5	5	5	4	4	5	4	5	2	2	1
4	3	4	5	5	3	5	5	5	4	4	4	5	5	4	5	4	5	0	0	0	0	0	1	0	1	1	1	1	0	1	1	0	5	3	4	4	5	5	4	4	5	4	1	2	1
1	3	2	5	5	5	4	4	4	5	3	5	5	4	4	3	5	5	1	0	1	0	0	1	0	0	1	1	1	1	1	1	0	5	5	4	5	3	4	4	3	5	4	1	2	1
1	3	2	5	5	5	4	4	4	5	3	5	5	4	4	3	5	5	1	0	1	0	0	1	0	0	1	1	1	1	1	1	0	5	5	4	5	3	4	4	3	5	4	1	2	1
4	3	1	5	5	4	4	4	5	4	4	4	4	4	5	5	5	5	0	1	0	0	0	1	1	0	1	1	0	1	1	1	0	4	4	4	4	4	4	4	5	4	5	1	2	1
3	4	5	5	4	4	4	4	3	4	5	4	5	3	4	5	5	5	1	1	0	0	1	1	1	1	1	0	1	0	0	0	0	3	4	5	4	5	4	4	5	4	5	1	3	1
3	5	3	4	4	4	4	5	5	5	4	4	5	5	5	4	5	4	1	1	1	0	1	0	1	0	0	1	0	1	0	0	0	5	4	5	4	5	4	3	4	4	4	2	2	1
2	5	3	4	5	4	5	4	3	5	3	5	5	5	4	3	3	3	1	1	0	0	1	1	1	0	1	1	1	0	0	0	0	4	4	3	4	4	4	5	4	4	3	1	2	1
3	4	1	4	4	4	4	5	4	4	5	4	5	4	4	4	5	5	1	1	0	1	1	1	0	1	1	1	1	0	0	0	0	4	5	4	5	4	4	4	5	4	4	2	2	1
4	1	2	5	5	3	5	5	3	5	4	5	5	3	4	4	5	4	1	1	0	0	1	1	1	1	1	0	1	0	0	0	1	4	4	3	4	4	4	3	5	5	5	1	2	1
1	2	2	3	4	4	4	5	4	4	5	5	5	4	5	4	3	4	1	1	1	0	0	0	1	1	1	1	0	1	1	1	0	4	3	3	5	4	5	4	4	5	4	2	2	1
2	2	2	4	5	3	4	4	3	4	4	5	5	3	5	4	5	5	1	1	1	1	1	1	0	1	0	0	1	1	0	0	0	5	4	4	4	5	3	5	5	4	5	1	2	2
1	5	2	5	3	4	4	4	5	4	4	5	4	4	4	5	4	4	1	0	0	0	1	1	1	0	0	1	0	0	0	0	0	5	5	4	5	3	5	5	5	5	4	2	3	1
2	5	3	4	5	4	4	5	4	4	3	3	4	4	4	4	5	5	0	1	1	0	0	1	0	1	1	1	1	1	0	0	0	4	4	5	3	3	5	5	4	4	5	1	2	2
1	2	4	5	4	4	5	5	4	4	4	5	3	4	5	4	4	4	1	1	0	0	1	0	1	1	1	1	0	1	1	1	0	4	4	5	4	3	5	5	5	3	4	2	2	1
2	3	1	5	5	4	4	5	3	4	5	5	3	4	4	4	4	4	1	1	0	0	1	1	1	1	1	0	1	1	1	1	0	3	4	5	4	5	3	5	5	3	3	1	2	1
4	5	3	5	4	4	4	5	5	5	4	3	4	5	3	5	5	5	1	1	0	1	1	1	1	0	1	1	0	1	0	0	0	4	4	5	3	5	4	5	4	5	4	2	3	1
3	3	2	4	5	3	4	3	4	4	5	5	5	3	5	4	3	4	1	0	0	1	1	0	1	0	1	1	0	1	0	0	0	4	5	5	3	4	4	5	4	4	5	2	2	2
2	1	1	4	3	4	3	3	4	4	3	5	5	5	4	4	5	5	1	1	0	1	1	1	1	0	1	1	0	1	0	0	0	4	5	4	5	5	5	5	5	4	4	2	2	1
4	3	2	4	5	5	4	3	4	5	4	3	4	3	5	4	3	3	0	1	0	0	1	1	1	1	0	1	0	0	0	0	0	4	5	5	3	4	5	5	5	3	4	1	2	1
3	3	3	5	5	5	4	4	4	5	5	3	5	4	4	5	4	4	1	0	0	0	1	1	0	0	1	1	1	1	0	0	0	5	4	4	4	4	5	3	4	4	5	2	2	1
3	1	5	5	5	5	4	5	3	5	4	3	5	4	4	3	4	4	1	0	0	0	0	1	1	1	1	1	1	1	0	0	1	5	4	5	3	5	3	4	4	4	4	1	2	1
3	3	1	5	5	5	5	4	5	5	5	5	4	5	5	4	5	5	1	1	0	1	0	1	0	0	1	1	1	1	1	1	0	5	4	4	5	4	3	4	5	3	5	1	2	1
4	3	3	4	4	4	5	5	4	3	3	4	5	4	5	5	3	5	0	1	1	1	1	1	0	1	1	1	1	1	0	0	0	4	5	4	3	5	4	5	5	4	4	2	2	1
3	4	2	5	5	4	4	5	4	5	4	4	4	4	5	4	4	5	0	1	0	0	1	1	1	1	1	0	0	0	0	0	0	4	3	4	5	5	4	3	5	5	4	2	2	1
5	3	2	4	3	5	5	4	4	5	4	5	4	4	4	4	4	4	0	0	0	1	0	1	0	1	1	1	1	0	0	0	0	5	5	5	4	4	5	5	4	5	4	2	2	1
3	5	1	4	4	3	4	4	4	5	5	5	3	5	5	5	4	5	1	1	0	0	0	1	1	1	1	0	1	1	0	0	0	5	5	3	4	5	5	4	4	5	4	2	2	1
3	5	4	4	5	4	3	5	5	5	4	5	5	5	4	4	3	5	1	1	0	0	0	0	1	1	0	1	1	1	1	1	1	4	5	5	4	4	4	5	5	5	4	2	2	1
1	4	2	4	4	4	4	5	4	3	4	5	4	4	5	3	4	5	1	1	0	0	0	0	0	1	1	1	1	1	0	0	0	4	4	5	3	5	4	4	5	5	4	2	2	2
4	4	5	5	3	4	4	5	5	5	4	4	5	5	4	4	5	4	1	1	0	0	1	1	0	0	1	1	1	1	0	0	0	4	3	4	5	5	5	4	4	3	3	1	3	1
2	5	4	4	4	4	5	4	5	5	4	5	4	5	5	5	5	4	1	1	1	0	0	0	0	0	1	1	1	1	0	0	0	3	4	5	5	5	4	4	4	5	5	1	2	1
3	5	4	4	4	3	5	5	4	5	5	5	5	4	4	4	5	5	1	0	0	0	0	1	1	0	1	1	1	1	0	0	0	4	5	5	4	3	3	5	5	5	4	2	2	2
3	2	3	5	5	5	5	5	5	5	4	4	5	5	5	5	4	5	1	1	0	1	1	1	1	0	0	1	1	1	0	0	0	3	5	5	4	5	4	3	5	4	5	1	2	1
3	3	1	5	4	5	4	5	5	5	5	4	4	5	5	5	4	5	0	1	1	1	0	1	0	1	1	0	1	1	1	1	0	3	4	4	3	4	4	3	5	4	5	1	3	1
3	2	2	3	4	3	5	4	5	4	5	4	4	5	4	3	4	4	0	0	0	0	0	0	1	0	1	1	1	0	0	0	0	4	5	5	4	4	3	5	5	4	5	2	2	2
4	2	2	5	4	5	3	5	5	4	4	4	5	5	3	4	4	5	1	1	0	0	1	0	1	1	1	1	1	1	1	1	0	4	4	4	4	5	3	4	3	3	5	2	2	1
4	2	5	4	5	5	4	3	5	3	4	4	3	5	5	4	4	5	1	1	1	0	1	1	1	1	1	1	1	0	0	0	1	4	3	4	4	4	4	5	5	4	5	2	2	1
4	3	1	4	4	4	4	3	5	4	4	4	4	4	5	5	4	5	0	1	0	1	1	1	1	1	1	1	0	1	0	0	0	3	4	5	4	5	3	5	5	4	5	1	2	1
4	5	2	1	1	5	2	1	4	1	1	2	3	2	1	1	1	3	1	1	1	1	1	1	1	1	1	0	1	1	1	1	1	4	4	2	3	3	4	4	4	4	4	1	2	1
3	3	5	1	1	5	1	1	5	1	1	1	5	1	1	1	1	5	1	1	0	1	1	1	1	1	1	1	1	1	0	0	0	1	1	1	1	1	1	1	1	1	1	1	3	2
2	5	3	1	2	5	3	1	3	1	2	3	3	3	2	2	2	4	0	0	1	1	0	0	0	1	0	0	1	1	1	1	0	4	4	3	3	3	4	4	3	4	3	1	3	2
1	5	5	1	2	4	2	2	4	2	2	2	4	2	1	2	2	4	1	1	1	0	0	1	1	1	1	1	1	1	1	1	1	4	3	4	4	4	4	3	4	3	4	2	1	2
2	3	3	2	2	3	3	2	3	4	4	5	3	4	5	4	5	3	1	1	1	1	1	1	1	1	1	1	1	1	0	0	0	4	4	3	4	4	5	4	4	5	4	2	2	1
2	4	2	1	2	4	2	2	2	2	2	1	2	2	2	1	2	3	1	0	0	1	0	0	0	0	0	0	1	1	1	1	0	4	3	2	3	4	4	4	4	4	3	2	3	2
2	3	5	2	3	4	2	1	5	1	4	4	4	4	1	2	2	5	1	1	1	0	1	1	1	1	1	0	1	1	1	1	1	4	4	4	4	3	4	4	3	4	4	2	3	2
2	4	2	2	4	4	3	4	2	4	5	5	4	3	5	4	4	4	0	0	1	1	1	0	1	1	1	0	1	1	1	1	1	4	3	4	3	3	4	4	3	4	3	2	2	2
1	5	1	1	2	5	5	3	4	1	5	5	3	3	1	1	4	2	1	1	0	1	1	1	0	1	1	0	1	1	1	1	0	4	4	2	4	2	4	4	3	4	2	2	2	1
1	4	4	2	1	5	2	2	4	1	4	5	4	2	5	4	5	2	1	1	1	1	1	1	1	1	1	1	1	1	1	1	1	4	4	2	4	5	5	4	5	5	5	2	2	2
2	3	2	1	2	3	4	2	4	3	2	5	4	2	5	1	5	2	1	1	1	1	1	1	1	1	1	1	1	1	1	1	1	1	4	4	4	4	5	5	3	4	4	2	1	1
1	3	4	1	2	2	2	1	3	2	1	4	1	1	2	4	5	2	1	1	0	1	1	0	0	1	1	1	1	0	1	1	1	3	3	3	4	4	5	5	5	4	3	2	2	2
2	4	2	3	3	2	2	3	2	3	3	3	2	4	4	3	3	3	1	1	1	1	1	1	1	1	1	0	1	1	0	0	0	3	3	3	3	3	3	3	3	3	3	1	3	1
4	4	5	2	3	4	3	3	5	1	2	5	4	1	5	3	5	5	1	1	1	1	1	1	1	1	0	1	1	1	0	0	1	3	4	3	1	2	5	4	3	4	4	2	1	1
2	3	2	3	4	5	4	4	5	3	4	4	5	4	4	4	4	5	0	0	0	1	0	0	0	0	0	0	0	0	0	0	0	2	2	2	3	4	4	4	4	4	4	2	2	1
2	3	3	2	3	5	3	3	4	2	4	5	4	2	1	2	3	4	1	1	1	0	1	1	1	1	1	1	1	1	0	0	0	4	4	3	3	3	4	4	3	3	3	2	1	1
1	2	5	4	5	5	4	4	5	4	4	3	5	5	3	4	4	5	1	0	1	1	1	1	1	0	0	0	0	1	1	1	0	3	3	2	2	1	2	2	1	1	1	2	1	1
4	4	1	3	4	4	4	4	5	4	4	5	5	4	4	5	4	5	1	0	1	1	1	1	1	1	1	1	1	1	1	1	0	4	3	3	2	2	4	2	3	4	3	2	3	2
1	3	3	4	4	3	4	4	4	4	4	4	4	4	4	4	4	4	1	1	1	0	1	1	1	1	1	0	1	1	1	1	1	4	4	3	3	3	4	4	3	3	3	2	3	2
4	5	2	1	2	3	2	2	5	1	2	5	3	2	2	1	3	3	1	1	1	1	1	1	1	1	1	0	1	1	1	1	1	5	4	4	5	4	5	4	4	5	4	1	2	2
4	5	2	2	3	3	3	3	3	2	2	4	2	4	1	2	2	5	1	1	1	0	1	1	0	1	1	1	1	1	1	1	1	4	4	4	5	4	3	4	3	5	4	1	3	2
